# Supplementary material for: Exploring neurodevelopment via spatiotemporal collation of anatomical networks with NeuroSC
Source: eLife. 2025 Oct 21;13:RP103977. doi: 10.7554/eLife.103977 (PMC12539806; doi:10.7554/eLife.103977)
Supplement: Supplementary file 8. — Type the name of a ‘Neuron of Interest’ (NOI) in the indicated cell to filter for the summed adjacency counts for each contact partner. For each partner, there are two columns: Total number of contacts (number of EM sections NOI and partner are in contact) and Total Weights (summed number of pixels NOI and partner contacts). [file elife-103977-supp8.xlsx]

## Sheet: L1_0hr
Neuron1	Neuron2	Section	Weight				Partner	# of contacts	Total Weights			Partner	# of contacts for XXX-L	Total Weights for XXX-L	# of contacts for XXX-R	Total Weights for XXX-R
ADAR	ADAL	SEM_L1_3_4nm_slices18to283_EM 80	105		AIBL		ADAL	0	0	Write your NOI here		ADAL	0	0	0	0
ADAR	ADAL	SEM_L1_3_4nm_slices18to283_EM 81	225				ADAR	14	1533			ADAR	0	0	0	0
ADAR	ADAL	SEM_L1_3_4nm_slices18to283_EM 82	300				ADEL	0	0			ADEL	0	0	0	0
ADAR	ADAL	SEM_L1_3_4nm_slices18to283_EM 82	225				ADER	0	0			ADER	0	0	0	0
ADAR	ADAL	SEM_L1_3_4nm_slices18to283_EM 83	467				ADFL	6	417	Write your NOI hereL		ADFL	0	0	0	0
ADAR	ADAL	SEM_L1_3_4nm_slices18to283_EM 84	199				ADFR	8	876	Write your NOI hereR		ADFR	0	0	0	0
AVBL	ADAL	SEM_L1_3_4nm_slices18to283_EM 117	30				ADLL	39	3071			ADLL	0	0	0	0
AVBL	ADAL	SEM_L1_3_4nm_slices18to283_EM 118	48				ADLR	0	0			ADLR	0	0	0	0
AVBL	ADAL	SEM_L1_3_4nm_slices18to283_EM 119	71				AFDL	29	4156			AFDL	0	0	0	0
AVBL	ADAL	SEM_L1_3_4nm_slices18to283_EM 120	74				AFDR	0	0			AFDR	0	0	0	0
AVBL	ADAL	SEM_L1_3_4nm_slices18to283_EM 122	35				AIAL	95	19102			AIAL	0	0	0	0
AVBL	ADAL	SEM_L1_3_4nm_slices18to283_EM 123	123				AIAR	0	0			AIAR	0	0	0	0
AVBL	ADAL	SEM_L1_3_4nm_slices18to283_EM 124	144				AIBL	0	0			AIBL	0	0	0	0
AVBL	ADAL	SEM_L1_3_4nm_slices18to283_EM 125	117				AIBR	24	3450			AIBR	0	0	0	0
AVBL	ADAL	SEM_L1_3_4nm_slices18to283_EM 147	59				AIML	0	0			AIML	0	0	0	0
AVBL	ADAL	SEM_L1_3_4nm_slices18to283_EM 148	34				AIMR	0	0			AIMR	0	0	0	0
AVBL	ADAL	SEM_L1_3_4nm_slices18to283_EM 154	20				AINL	22	7154			AINL	0	0	0	0
AVBL	ADAL	SEM_L1_3_4nm_slices18to283_EM 155	185				AINR	14	1446			AINR	0	0	0	0
AVBL	ADAL	SEM_L1_3_4nm_slices18to283_EM 156	264				AIYL	22	1068			AIYL	0	0	0	0
AVBL	ADAL	SEM_L1_3_4nm_slices18to283_EM 157	328				AIYR	0	0			AIYR	0	0	0	0
AVBL	ADAL	SEM_L1_3_4nm_slices18to283_EM 158	427				AIZL	5	222			AIZL	0	0	0	0
AVBL	ADAL	SEM_L1_3_4nm_slices18to283_EM 159	213				AIZR	53	6643			AIZR	0	0	0	0
AVBL	ADAL	SEM_L1_3_4nm_slices18to283_EM 159	206				ALA	0	0			ALA	0	0	0	0
AVBL	ADAL	SEM_L1_3_4nm_slices18to283_EM 160	106				ALML	0	0			ALML	0	0	0	0
AVBL	ADAL	SEM_L1_3_4nm_slices18to283_EM 160	116				ALMR	0	0			ALMR	0	0	0	0
AVBL	ADAL	SEM_L1_3_4nm_slices18to283_EM 161	68				ALNL	0	0			ALNL	0	0	0	0
AVBL	ADAL	SEM_L1_3_4nm_slices18to283_EM 161	115				ALNR	0	0			ALNR	0	0	0	0
AVBL	ADAL	SEM_L1_3_4nm_slices18to283_EM 162	37				AQR	0	0			AQR	0	0	0	0
AVBL	ADAL	SEM_L1_3_4nm_slices18to283_EM 162	96				ASEL	94	17878			ASEL	0	0	0	0
AVBL	ADAL	SEM_L1_3_4nm_slices18to283_EM 163	116				ASER	18	5570			ASER	0	0	0	0
AVBL	ADAL	SEM_L1_3_4nm_slices18to283_EM 164	123				ASGL	23	4313			ASGL	0	0	0	0
AVBL	ADAL	SEM_L1_3_4nm_slices18to283_EM 165	96				ASGR	0	0			ASGR	0	0	0	0
AVBL	ADAL	SEM_L1_3_4nm_slices18to283_EM 166	27				ASHL	34	6416			ASHL	0	0	0	0
AVBL	ADAL	SEM_L1_3_4nm_slices18to283_EM 201	63				ASHR	0	0			ASHR	0	0	0	0
AVBL	ADAL	SEM_L1_3_4nm_slices18to283_EM 202	87				ASIL	24	1867			ASIL	0	0	0	0
AVBL	ADAL	SEM_L1_3_4nm_slices18to283_EM 206	144				ASIR	0	0			ASIR	0	0	0	0
AVBL	ADAL	SEM_L1_3_4nm_slices18to283_EM 207	156				ASJL	0	0			ASJL	0	0	0	0
AVBL	ADAL	SEM_L1_3_4nm_slices18to283_EM 208	115				ASJR	0	0			ASJR	0	0	0	0
AVBL	ADAL	SEM_L1_3_4nm_slices18to283_EM 209	96				ASKL	47	5206			ASKL	0	0	0	0
SAADL	ADAL	SEM_L1_3_4nm_slices18to283_EM 152	48				ASKR	0	0			ASKR	0	0	0	0
SAADL	ADAL	SEM_L1_3_4nm_slices18to283_EM 153	31				AUAL	5	603			AUAL	0	0	0	0
SAADL	ADAL	SEM_L1_3_4nm_slices18to283_EM 154	31				AUAR	9	643			AUAR	0	0	0	0
SAADL	ADAL	SEM_L1_3_4nm_slices18to283_EM 156	41				AVAL	74	7397			AVAL	0	0	0	0
SAADL	ADAL	SEM_L1_3_4nm_slices18to283_EM 157	64				AVAR	0	0			AVAR	0	0	0	0
SAADL	ADAL	SEM_L1_3_4nm_slices18to283_EM 158	51				AVBL	30	4011			AVBL	0	0	0	0
SAADL	ADAL	SEM_L1_3_4nm_slices18to283_EM 159	69				AVBR	0	0			AVBR	0	0	0	0
SAADL	ADAL	SEM_L1_3_4nm_slices18to283_EM 160	45				AVDL	13	1009			AVDL	0	0	0	0
SAADL	ADAL	SEM_L1_3_4nm_slices18to283_EM 161	78				AVDR	8	557			AVDR	0	0	0	0
SAADL	ADAL	SEM_L1_3_4nm_slices18to283_EM 162	54				AVEL	45	4197			AVEL	0	0	0	0
SAADL	ADAL	SEM_L1_3_4nm_slices18to283_EM 163	63				AVER	12	1807			AVER	0	0	0	0
SAADL	ADAL	SEM_L1_3_4nm_slices18to283_EM 164	78				AVFL	0	0			AVFL	0	0	0	0
SAADL	ADAL	SEM_L1_3_4nm_slices18to283_EM 165	70				AVFR	0	0			AVFR	0	0	0	0
SAADL	ADAL	SEM_L1_3_4nm_slices18to283_EM 166	35				AVHL	0	0			AVHL	0	0	0	0
SAADL	ADAL	SEM_L1_3_4nm_slices18to283_EM 167	55				AVHR	0	0			AVHR	0	0	0	0
SAADL	ADAL	SEM_L1_3_4nm_slices18to283_EM 168	48				AVJL	0	0			AVJL	0	0	0	0
SAADL	ADAL	SEM_L1_3_4nm_slices18to283_EM 169	45				AVJR	0	0			AVJR	0	0	0	0
SAADL	ADAL	SEM_L1_3_4nm_slices18to283_EM 170	65				AVKL	41	3506			AVKL	0	0	0	0
SAADL	ADAL	SEM_L1_3_4nm_slices18to283_EM 171	70				AVKR	44	4637			AVKR	0	0	0	0
SAADL	ADAL	SEM_L1_3_4nm_slices18to283_EM 172	55				AVL	18	903			AVL	0	0	0	0
SAADL	ADAL	SEM_L1_3_4nm_slices18to283_EM 173	68				AVM	0	0			AVM	0	0	0	0
SAADL	ADAL	SEM_L1_3_4nm_slices18to283_EM 174	81				AWAL	8	581			AWAL	0	0	0	0
SAADL	ADAL	SEM_L1_3_4nm_slices18to283_EM 175	69				AWAR	0	0			AWAR	0	0	0	0
SAADL	ADAL	SEM_L1_3_4nm_slices18to283_EM 176	67				AWBL	18	1710			AWBL	0	0	0	0
SAADL	ADAL	SEM_L1_3_4nm_slices18to283_EM 177	81				AWBR	6	781			AWBR	0	0	0	0
SAADL	ADAL	SEM_L1_3_4nm_slices18to283_EM 178	68				AWCL	95	11676			AWCL	0	0	0	0
SAADL	ADAL	SEM_L1_3_4nm_slices18to283_EM 179	47				AWCR	13	1494			AWCR	0	0	0	0
SAADL	ADAL	SEM_L1_3_4nm_slices18to283_EM 180	73				BAGL	6	1964			BAGL	0	0	0	0
SAADL	ADAL	SEM_L1_3_4nm_slices18to283_EM 181	76				BAGR	9	506			BAGR	0	0	0	0
SAADL	ADAL	SEM_L1_3_4nm_slices18to283_EM 182	67				BDUL	0	0			BDUL	0	0	0	0
SAADL	ADAL	SEM_L1_3_4nm_slices18to283_EM 183	74				BDUR	0	0			BDUR	0	0	0	0
SAADL	ADAL	SEM_L1_3_4nm_slices18to283_EM 184	71				CEPDL	0	0			CEPDL	0	0	0	0
SAADL	ADAL	SEM_L1_3_4nm_slices18to283_EM 185	88				CEPDR	0	0			CEPDR	0	0	0	0
SAADL	ADAL	SEM_L1_3_4nm_slices18to283_EM 186	101				CEPVL	0	0			CEPVL	0	0	0	0
SAADL	ADAL	SEM_L1_3_4nm_slices18to283_EM 187	126				CEPVR	3	179			CEPVR	0	0	0	0
SAADL	ADAL	SEM_L1_3_4nm_slices18to283_EM 189	135				DVA	13	1157			DVA	0	0	0	0
SAADL	ADAL	SEM_L1_3_4nm_slices18to283_EM 190	130				DVC	22	4478			DVC	0	0	0	0
SAADL	ADAL	SEM_L1_3_4nm_slices18to283_EM 191	124				FLPL	0	0			FLPL	0	0	0	0
SAADL	ADAL	SEM_L1_3_4nm_slices18to283_EM 192	120				FLPR	0	0			FLPR	0	0	0	0
SAADL	ADAL	SEM_L1_3_4nm_slices18to283_EM 193	99				HSNL	0	0			HSNL	0	0	0	0
SAADL	ADAL	SEM_L1_3_4nm_slices18to283_EM 194	94				HSNR	0	0			HSNR	0	0	0	0
SAADL	ADAL	SEM_L1_3_4nm_slices18to283_EM 195	62				IL1DL	3	108			IL1DL	0	0	0	0
SAADL	ADAL	SEM_L1_3_4nm_slices18to283_EM 196	73				IL1DR	0	0			IL1DR	0	0	0	0
SIBVL	ADAL	SEM_L1_3_4nm_slices18to283_EM 85	33				IL1L	3	12			IL1L	0	0	0	0
SIBVL	ADAL	SEM_L1_3_4nm_slices18to283_EM 86	41				IL1R	0	0			IL1R	0	0	0	0
SIBVL	ADAL	SEM_L1_3_4nm_slices18to283_EM 148	76				IL1VL	0	0			IL1VL	0	0	0	0
SIBVL	ADAL	SEM_L1_3_4nm_slices18to283_EM 149	215				IL1VR	0	0			IL1VR	0	0	0	0
SIBVL	ADAL	SEM_L1_3_4nm_slices18to283_EM 160	91				IL2DL	0	0			IL2DL	0	0	0	0
SIBVL	ADAL	SEM_L1_3_4nm_slices18to283_EM 161	120				IL2DR	3	312			IL2DR	0	0	0	0
SIBVL	ADAL	SEM_L1_3_4nm_slices18to283_EM 162	142				IL2L	2	63			IL2L	0	0	0	0
SIBVL	ADAL	SEM_L1_3_4nm_slices18to283_EM 163	124				IL2R	3	268			IL2R	0	0	0	0
SIBVL	ADAL	SEM_L1_3_4nm_slices18to283_EM 164	113				IL2VL	0	0			IL2VL	0	0	0	0
SIBVL	ADAL	SEM_L1_3_4nm_slices18to283_EM 165	123				IL2VR	7	619			IL2VR	0	0	0	0
SIBVL	ADAL	SEM_L1_3_4nm_slices18to283_EM 166	103				OLLL	0	0			OLLL	0	0	0	0
SIBVL	ADAL	SEM_L1_3_4nm_slices18to283_EM 167	88				OLLR	6	525			OLLR	0	0	0	0
SIBVL	ADAL	SEM_L1_3_4nm_slices18to283_EM 168	60				OLQDL	0	0			OLQDL	0	0	0	0
SIBVL	ADAL	SEM_L1_3_4nm_slices18to283_EM 169	68				OLQDR	0	0			OLQDR	0	0	0	0
SIBVL	ADAL	SEM_L1_3_4nm_slices18to283_EM 170	63				OLQVL	0	0			OLQVL	0	0	0	0
SIBVL	ADAL	SEM_L1_3_4nm_slices18to283_EM 171	48				OLQVR	0	0			OLQVR	0	0	0	0
SIBVL	ADAL	SEM_L1_3_4nm_slices18to283_EM 172	70				PLNL	0	0			PLNL	0	0	0	0
SIBVL	ADAL	SEM_L1_3_4nm_slices18to283_EM 173	83				PLNR	0	0			PLNR	0	0	0	0
SIBVL	ADAL	SEM_L1_3_4nm_slices18to283_EM 174	75				PVCL	0	0			PVCL	0	0	0	0
SIBVL	ADAL	SEM_L1_3_4nm_slices18to283_EM 175	60				PVCR	0	0			PVCR	0	0	0	0
SIBVL	ADAL	SEM_L1_3_4nm_slices18to283_EM 176	67				PVNL	0	0			PVNL	0	0	0	0
SIBVL	ADAL	SEM_L1_3_4nm_slices18to283_EM 177	71				PVNR	0	0			PVNR	0	0	0	0
SIBVL	ADAL	SEM_L1_3_4nm_slices18to283_EM 178	66				PVPL	0	0			PVPL	0	0	0	0
SIBVL	ADAL	SEM_L1_3_4nm_slices18to283_EM 179	75				PVPR	3	86			PVPR	0	0	0	0
SIBVL	ADAL	SEM_L1_3_4nm_slices18to283_EM 180	93				PVQL	6	1190			PVQL	0	0	0	0
SIBVL	ADAL	SEM_L1_3_4nm_slices18to283_EM 181	86				PVQR	0	0			PVQR	0	0	0	0
SIBVL	ADAL	SEM_L1_3_4nm_slices18to283_EM 182	84				PVR	0	0			PVR	0	0	0	0
SIBVL	ADAL	SEM_L1_3_4nm_slices18to283_EM 183	91				PVT	16	1870			PVT	0	0	0	0
SIBVL	ADAL	SEM_L1_3_4nm_slices18to283_EM 184	87				RIAL	2	78			RIAL	0	0	0	0
SIBVL	ADAL	SEM_L1_3_4nm_slices18to283_EM 185	95				RIAR	10	1412			RIAR	0	0	0	0
SIBVL	ADAL	SEM_L1_3_4nm_slices18to283_EM 186	97				RIBL	0	0			RIBL	0	0	0	0
SIBVL	ADAL	SEM_L1_3_4nm_slices18to283_EM 187	113				RIBR	10	1143			RIBR	0	0	0	0
SIBVL	ADAL	SEM_L1_3_4nm_slices18to283_EM 189	110				RICL	4	258			RICL	0	0	0	0
SIBVL	ADAL	SEM_L1_3_4nm_slices18to283_EM 190	107				RICR	12	1599			RICR	0	0	0	0
SIBVL	ADAL	SEM_L1_3_4nm_slices18to283_EM 191	28				RID	0	0			RID	0	0	0	0
SIBVL	ADAL	SEM_L1_3_4nm_slices18to283_EM 195	51				RIFL	5	46			RIFL	0	0	0	0
SIBVL	ADAL	SEM_L1_3_4nm_slices18to283_EM 196	59				RIFR	0	0			RIFR	0	0	0	0
SIBVL	ADAL	SEM_L1_3_4nm_slices18to283_EM 197	77				RIGL	4	110			RIGL	0	0	0	0
SIBVL	ADAL	SEM_L1_3_4nm_slices18to283_EM 198	82				RIGR	49	6588			RIGR	0	0	0	0
SIBVL	ADAL	SEM_L1_3_4nm_slices18to283_EM 199	79				RIH	0	0			RIH	0	0	0	0
SIBVL	ADAL	SEM_L1_3_4nm_slices18to283_EM 200	63				RIML	16	1798			RIML	0	0	0	0
URYDL	ADAL	SEM_L1_3_4nm_slices18to283_EM 103	77				RIMR	95	10846			RIMR	0	0	0	0
URYDL	ADAL	SEM_L1_3_4nm_slices18to283_EM 104	101				RIPL	0	0			RIPL	0	0	0	0
URYDL	ADAL	SEM_L1_3_4nm_slices18to283_EM 105	108				RIPR	0	0			RIPR	0	0	0	0
URYDL	ADAL	SEM_L1_3_4nm_slices18to283_EM 106	80				RIR	0	0			RIR	0	0	0	0
URYDL	ADAL	SEM_L1_3_4nm_slices18to283_EM 107	35				RIS	0	0			RIS	0	0	0	0
URYDL	ADAL	SEM_L1_3_4nm_slices18to283_EM 110	73				RIVL	64	8850			RIVL	0	0	0	0
URYDL	ADAL	SEM_L1_3_4nm_slices18to283_EM 111	64				RIVR	10	759			RIVR	0	0	0	0
URYDL	ADAL	SEM_L1_3_4nm_slices18to283_EM 112	54				RMDDL	0	0			RMDDL	0	0	0	0
URYDL	ADAL	SEM_L1_3_4nm_slices18to283_EM 113	61				RMDDR	0	0			RMDDR	0	0	0	0
URYDL	ADAL	SEM_L1_3_4nm_slices18to283_EM 114	79				RMDL	0	0			RMDL	0	0	0	0
URYDL	ADAL	SEM_L1_3_4nm_slices18to283_EM 115	108				RMDR	0	0			RMDR	0	0	0	0
URYDL	ADAL	SEM_L1_3_4nm_slices18to283_EM 116	112				RMDVL	0	0			RMDVL	0	0	0	0
URYDL	ADAL	SEM_L1_3_4nm_slices18to283_EM 117	141				RMDVR	0	0			RMDVR	0	0	0	0
URYDL	ADAL	SEM_L1_3_4nm_slices18to283_EM 118	140				RMED	0	0			RMED	0	0	0	0
URYDL	ADAL	SEM_L1_3_4nm_slices18to283_EM 119	130				RMEL	0	0			RMEL	0	0	0	0
URYDL	ADAL	SEM_L1_3_4nm_slices18to283_EM 120	77				RMER	0	0			RMER	0	0	0	0
AVBL	ADAR	SEM_L1_3_4nm_slices18to283_EM 182	40				RMEV	3	274			RMEV	0	0	0	0
AVBL	ADAR	SEM_L1_3_4nm_slices18to283_EM 183	139				RMFL	0	0			RMFL	0	0	0	0
AVBL	ADAR	SEM_L1_3_4nm_slices18to283_EM 184	177				RMFR	0	0			RMFR	0	0	0	0
AVBL	ADAR	SEM_L1_3_4nm_slices18to283_EM 185	182				RMGL	0	0			RMGL	0	0	0	0
AVBL	ADAR	SEM_L1_3_4nm_slices18to283_EM 186	184				RMGR	6	432			RMGR	0	0	0	0
AVBL	ADAR	SEM_L1_3_4nm_slices18to283_EM 187	197				RMHL	0	0			RMHL	0	0	0	0
AVBL	ADAR	SEM_L1_3_4nm_slices18to283_EM 188	134				RMHR	0	0			RMHR	0	0	0	0
AVBL	ADAR	SEM_L1_3_4nm_slices18to283_EM 189	104				SAADL	17	2134			SAADL	0	0	0	0
AVBL	ADAR	SEM_L1_3_4nm_slices18to283_EM 190	126				SAADR	34	2805			SAADR	0	0	0	0
AVBL	ADAR	SEM_L1_3_4nm_slices18to283_EM 201	52				SAAVL	11	787			SAAVL	0	0	0	0
AVBL	ADAR	SEM_L1_3_4nm_slices18to283_EM 202	68				SAAVR	7	562			SAAVR	0	0	0	0
AVBL	ADAR	SEM_L1_3_4nm_slices18to283_EM 203	64				SDQL	0	0			SDQL	0	0	0	0
AVBL	ADAR	SEM_L1_3_4nm_slices18to283_EM 204	59				SDQR	0	0			SDQR	0	0	0	0
AVBL	ADAR	SEM_L1_3_4nm_slices18to283_EM 205	69				SIADL	0	0			SIADL	0	0	0	0
AVBL	ADAR	SEM_L1_3_4nm_slices18to283_EM 206	68				SIADR	34	3163			SIADR	0	0	0	0
AVBL	ADAR	SEM_L1_3_4nm_slices18to283_EM 207	54				SIAVL	0	0			SIAVL	0	0	0	0
AVBL	ADAR	SEM_L1_3_4nm_slices18to283_EM 208	34				SIAVR	0	0			SIAVR	0	0	0	0
AWAR	ADAR	SEM_L1_3_4nm_slices18to283_EM 133	51				SIBDL	7	479			SIBDL	0	0	0	0
AWAR	ADAR	SEM_L1_3_4nm_slices18to283_EM 134	94				SIBDR	1	10			SIBDR	0	0	0	0
AWAR	ADAR	SEM_L1_3_4nm_slices18to283_EM 135	202				SIBVL	9	840			SIBVL	0	0	0	0
AWAR	ADAR	SEM_L1_3_4nm_slices18to283_EM 135	96				SIBVR	12	1422			SIBVR	0	0	0	0
AWAR	ADAR	SEM_L1_3_4nm_slices18to283_EM 136	215				SMBDL	0	0			SMBDL	0	0	0	0
AWAR	ADAR	SEM_L1_3_4nm_slices18to283_EM 136	183				SMBDR	36	4986			SMBDR	0	0	0	0
AWAR	ADAR	SEM_L1_3_4nm_slices18to283_EM 137	190				SMBVL	0	0			SMBVL	0	0	0	0
IL1VR	ADAR	SEM_L1_3_4nm_slices18to283_EM 138	68				SMBVR	5	520			SMBVR	0	0	0	0
IL1VR	ADAR	SEM_L1_3_4nm_slices18to283_EM 138	45				SMDDL	1	5			SMDDL	0	0	0	0
IL1VR	ADAR	SEM_L1_3_4nm_slices18to283_EM 139	67				SMDDR	60	7884			SMDDR	0	0	0	0
IL1VR	ADAR	SEM_L1_3_4nm_slices18to283_EM 140	17				SMDVL	0	0			SMDVL	0	0	0	0
IL2VR	ADAR	SEM_L1_3_4nm_slices18to283_EM 137	46				SMDVR	4	323			SMDVR	0	0	0	0
PVPR	ADAR	SEM_L1_3_4nm_slices18to283_EM 191	31				URADL	0	0			URADL	0	0	0	0
PVPR	ADAR	SEM_L1_3_4nm_slices18to283_EM 192	72				URADR	0	0			URADR	0	0	0	0
PVPR	ADAR	SEM_L1_3_4nm_slices18to283_EM 193	87				URAVL	0	0			URAVL	0	0	0	0
PVPR	ADAR	SEM_L1_3_4nm_slices18to283_EM 194	94				URAVR	7	1024			URAVR	0	0	0	0
PVPR	ADAR	SEM_L1_3_4nm_slices18to283_EM 195	97				URBL	0	0			URBL	0	0	0	0
PVPR	ADAR	SEM_L1_3_4nm_slices18to283_EM 196	110				URBR	0	0			URBR	0	0	0	0
PVPR	ADAR	SEM_L1_3_4nm_slices18to283_EM 197	114				URXL	3	280			URXL	0	0	0	0
PVPR	ADAR	SEM_L1_3_4nm_slices18to283_EM 198	124				URXR	0	0			URXR	0	0	0	0
PVPR	ADAR	SEM_L1_3_4nm_slices18to283_EM 199	120				URYDL	0	0			URYDL	0	0	0	0
PVPR	ADAR	SEM_L1_3_4nm_slices18to283_EM 200	99				URYDR	7	891			URYDR	0	0	0	0
PVPR	ADAR	SEM_L1_3_4nm_slices18to283_EM 201	90				URYVL	0	0			URYVL	0	0	0	0
PVPR	ADAR	SEM_L1_3_4nm_slices18to283_EM 202	63				URYVR	11	1442			URYVR	0	0	0	0
PVPR	ADAR	SEM_L1_3_4nm_slices18to283_EM 210	30				VB01	0	0			VB01	0	0	0	0
PVPR	ADAR	SEM_L1_3_4nm_slices18to283_EM 211	84
PVPR	ADAR	SEM_L1_3_4nm_slices18to283_EM 212	104
PVPR	ADAR	SEM_L1_3_4nm_slices18to283_EM 213	124
PVPR	ADAR	SEM_L1_3_4nm_slices18to283_EM 214	113
PVPR	ADAR	SEM_L1_3_4nm_slices18to283_EM 215	77
PVPR	ADAR	SEM_L1_3_4nm_slices18to283_EM 216	58
PVPR	ADAR	SEM_L1_3_4nm_slices18to283_EM 217	79
PVPR	ADAR	SEM_L1_3_4nm_slices18to283_EM 218	73
PVPR	ADAR	SEM_L1_3_4nm_slices18to283_EM 219	89
PVPR	ADAR	SEM_L1_3_4nm_slices18to283_EM 220	114
PVPR	ADAR	SEM_L1_3_4nm_slices18to283_EM 221	118
PVPR	ADAR	SEM_L1_3_4nm_slices18to283_EM 222	98
RMDVL	ADAR	SEM_L1_3_4nm_slices18to283_EM 176	26
RMDVL	ADAR	SEM_L1_3_4nm_slices18to283_EM 177	44
RMDVL	ADAR	SEM_L1_3_4nm_slices18to283_EM 178	82
RMDVL	ADAR	SEM_L1_3_4nm_slices18to283_EM 179	72
RMDVL	ADAR	SEM_L1_3_4nm_slices18to283_EM 180	75
RMDVL	ADAR	SEM_L1_3_4nm_slices18to283_EM 181	83
RMDVL	ADAR	SEM_L1_3_4nm_slices18to283_EM 182	86
RMDVL	ADAR	SEM_L1_3_4nm_slices18to283_EM 183	81
RMDVL	ADAR	SEM_L1_3_4nm_slices18to283_EM 184	78
RMDVL	ADAR	SEM_L1_3_4nm_slices18to283_EM 185	80
RMDVL	ADAR	SEM_L1_3_4nm_slices18to283_EM 186	65
RMDVL	ADAR	SEM_L1_3_4nm_slices18to283_EM 187	63
RMDVL	ADAR	SEM_L1_3_4nm_slices18to283_EM 188	62
RMDVL	ADAR	SEM_L1_3_4nm_slices18to283_EM 189	30
RMDVL	ADAR	SEM_L1_3_4nm_slices18to283_EM 190	1
SAADL	ADAR	SEM_L1_3_4nm_slices18to283_EM 104	17
SAADL	ADAR	SEM_L1_3_4nm_slices18to283_EM 105	51
SAADL	ADAR	SEM_L1_3_4nm_slices18to283_EM 106	78
SAADL	ADAR	SEM_L1_3_4nm_slices18to283_EM 107	148
SAADL	ADAR	SEM_L1_3_4nm_slices18to283_EM 109	77
SAADL	ADAR	SEM_L1_3_4nm_slices18to283_EM 110	39
ADER	ADEL	SEM_L1_3_4nm_slices18to283_EM 219	34
ADER	ADEL	SEM_L1_3_4nm_slices18to283_EM 220	58
ADER	ADEL	SEM_L1_3_4nm_slices18to283_EM 221	60
ADER	ADEL	SEM_L1_3_4nm_slices18to283_EM 222	96
AVAL	ADEL	SEM_L1_3_4nm_slices18to283_EM 221	101
AVAL	ADEL	SEM_L1_3_4nm_slices18to283_EM 222	95
AVAR	ADEL	SEM_L1_3_4nm_slices18to283_EM 216	113
AVAR	ADEL	SEM_L1_3_4nm_slices18to283_EM 217	146
AVAR	ADEL	SEM_L1_3_4nm_slices18to283_EM 218	143
AVAR	ADEL	SEM_L1_3_4nm_slices18to283_EM 219	29
AVDR	ADEL	SEM_L1_3_4nm_slices18to283_EM 219	47
AVDR	ADEL	SEM_L1_3_4nm_slices18to283_EM 220	98
AVDR	ADEL	SEM_L1_3_4nm_slices18to283_EM 221	202
AVDR	ADEL	SEM_L1_3_4nm_slices18to283_EM 222	173
AVKL	ADEL	SEM_L1_3_4nm_slices18to283_EM 217	50
AVKL	ADEL	SEM_L1_3_4nm_slices18to283_EM 218	109
AVKL	ADEL	SEM_L1_3_4nm_slices18to283_EM 219	131
AVKL	ADEL	SEM_L1_3_4nm_slices18to283_EM 220	141
AVKL	ADEL	SEM_L1_3_4nm_slices18to283_EM 221	110
AVKL	ADEL	SEM_L1_3_4nm_slices18to283_EM 222	82
DVC	ADEL	SEM_L1_3_4nm_slices18to283_EM 216	164
DVC	ADEL	SEM_L1_3_4nm_slices18to283_EM 217	198
DVC	ADEL	SEM_L1_3_4nm_slices18to283_EM 218	191
DVC	ADEL	SEM_L1_3_4nm_slices18to283_EM 219	155
DVC	ADEL	SEM_L1_3_4nm_slices18to283_EM 220	123
DVC	ADEL	SEM_L1_3_4nm_slices18to283_EM 221	116
DVC	ADEL	SEM_L1_3_4nm_slices18to283_EM 222	80
FLPL	ADEL	SEM_L1_3_4nm_slices18to283_EM 219	52
FLPL	ADEL	SEM_L1_3_4nm_slices18to283_EM 220	103
FLPL	ADEL	SEM_L1_3_4nm_slices18to283_EM 221	135
FLPL	ADEL	SEM_L1_3_4nm_slices18to283_EM 222	119
FLPR	ADEL	SEM_L1_3_4nm_slices18to283_EM 218	32
FLPR	ADEL	SEM_L1_3_4nm_slices18to283_EM 219	84
FLPR	ADEL	SEM_L1_3_4nm_slices18to283_EM 220	80
FLPR	ADEL	SEM_L1_3_4nm_slices18to283_EM 221	114
FLPR	ADEL	SEM_L1_3_4nm_slices18to283_EM 222	131
PVPL	ADEL	SEM_L1_3_4nm_slices18to283_EM 218	73
PVPL	ADEL	SEM_L1_3_4nm_slices18to283_EM 219	97
PVPL	ADEL	SEM_L1_3_4nm_slices18to283_EM 220	90
PVPL	ADEL	SEM_L1_3_4nm_slices18to283_EM 221	56
RIGL	ADEL	SEM_L1_3_4nm_slices18to283_EM 217	28
RIGL	ADEL	SEM_L1_3_4nm_slices18to283_EM 218	32
RIGL	ADEL	SEM_L1_3_4nm_slices18to283_EM 219	46
RIGL	ADEL	SEM_L1_3_4nm_slices18to283_EM 220	20
DVC	ADER	SEM_L1_3_4nm_slices18to283_EM 221	26
RIGL	ADER	SEM_L1_3_4nm_slices18to283_EM 219	44
RIGL	ADER	SEM_L1_3_4nm_slices18to283_EM 220	116
RIGL	ADER	SEM_L1_3_4nm_slices18to283_EM 221	152
RIGL	ADER	SEM_L1_3_4nm_slices18to283_EM 222	153
RIGR	ADER	SEM_L1_3_4nm_slices18to283_EM 220	89
RIGR	ADER	SEM_L1_3_4nm_slices18to283_EM 221	119
RIGR	ADER	SEM_L1_3_4nm_slices18to283_EM 222	149
AFDL	ADFL	SEM_L1_3_4nm_slices18to283_EM 92	34
AFDL	ADFL	SEM_L1_3_4nm_slices18to283_EM 93	124
AFDL	ADFL	SEM_L1_3_4nm_slices18to283_EM 94	159
AFDL	ADFL	SEM_L1_3_4nm_slices18to283_EM 95	164
AFDL	ADFL	SEM_L1_3_4nm_slices18to283_EM 96	162
AFDL	ADFL	SEM_L1_3_4nm_slices18to283_EM 97	155
AFDL	ADFL	SEM_L1_3_4nm_slices18to283_EM 98	137
AFDL	ADFL	SEM_L1_3_4nm_slices18to283_EM 99	84
AFDL	ADFL	SEM_L1_3_4nm_slices18to283_EM 124	61
AFDL	ADFL	SEM_L1_3_4nm_slices18to283_EM 125	122
AFDL	ADFL	SEM_L1_3_4nm_slices18to283_EM 126	120
AFDL	ADFL	SEM_L1_3_4nm_slices18to283_EM 127	100
AFDL	ADFL	SEM_L1_3_4nm_slices18to283_EM 128	100
AFDL	ADFL	SEM_L1_3_4nm_slices18to283_EM 129	73
AFDL	ADFL	SEM_L1_3_4nm_slices18to283_EM 130	36
AFDL	ADFL	SEM_L1_3_4nm_slices18to283_EM 152	127
AFDL	ADFL	SEM_L1_3_4nm_slices18to283_EM 153	162
AFDL	ADFL	SEM_L1_3_4nm_slices18to283_EM 154	192
AFDL	ADFL	SEM_L1_3_4nm_slices18to283_EM 155	74
AFDL	ADFL	SEM_L1_3_4nm_slices18to283_EM 159	12
AFDL	ADFL	SEM_L1_3_4nm_slices18to283_EM 160	221
AFDL	ADFL	SEM_L1_3_4nm_slices18to283_EM 161	51
AFDL	ADFL	SEM_L1_3_4nm_slices18to283_EM 169	30
AFDL	ADFL	SEM_L1_3_4nm_slices18to283_EM 170	118
AFDL	ADFL	SEM_L1_3_4nm_slices18to283_EM 171	154
AFDL	ADFL	SEM_L1_3_4nm_slices18to283_EM 172	163
AFDL	ADFL	SEM_L1_3_4nm_slices18to283_EM 173	150
AFDL	ADFL	SEM_L1_3_4nm_slices18to283_EM 174	139
AFDL	ADFL	SEM_L1_3_4nm_slices18to283_EM 175	76
AIBR	ADFL	SEM_L1_3_4nm_slices18to283_EM 85	110
AIBR	ADFL	SEM_L1_3_4nm_slices18to283_EM 89	61
AIBR	ADFL	SEM_L1_3_4nm_slices18to283_EM 90	48
ASEL	ADFL	SEM_L1_3_4nm_slices18to283_EM 96	37
ASEL	ADFL	SEM_L1_3_4nm_slices18to283_EM 97	84
ASEL	ADFL	SEM_L1_3_4nm_slices18to283_EM 98	116
ASEL	ADFL	SEM_L1_3_4nm_slices18to283_EM 99	137
ASEL	ADFL	SEM_L1_3_4nm_slices18to283_EM 100	153
ASEL	ADFL	SEM_L1_3_4nm_slices18to283_EM 101	176
ASEL	ADFL	SEM_L1_3_4nm_slices18to283_EM 102	138
ASEL	ADFL	SEM_L1_3_4nm_slices18to283_EM 103	166
ASEL	ADFL	SEM_L1_3_4nm_slices18to283_EM 104	137
ASEL	ADFL	SEM_L1_3_4nm_slices18to283_EM 105	108
ASEL	ADFL	SEM_L1_3_4nm_slices18to283_EM 106	84
ASEL	ADFL	SEM_L1_3_4nm_slices18to283_EM 107	34
ASEL	ADFL	SEM_L1_3_4nm_slices18to283_EM 154	225
ASEL	ADFL	SEM_L1_3_4nm_slices18to283_EM 178	6
ASEL	ADFL	SEM_L1_3_4nm_slices18to283_EM 179	52
ASEL	ADFL	SEM_L1_3_4nm_slices18to283_EM 180	111
ASEL	ADFL	SEM_L1_3_4nm_slices18to283_EM 181	106
ASEL	ADFL	SEM_L1_3_4nm_slices18to283_EM 182	89
AWBL	ADFL	SEM_L1_3_4nm_slices18to283_EM 93	45
AWBL	ADFL	SEM_L1_3_4nm_slices18to283_EM 94	164
AWBL	ADFL	SEM_L1_3_4nm_slices18to283_EM 95	216
AWBL	ADFL	SEM_L1_3_4nm_slices18to283_EM 96	207
AWBL	ADFL	SEM_L1_3_4nm_slices18to283_EM 97	161
AWBL	ADFL	SEM_L1_3_4nm_slices18to283_EM 98	132
AWBL	ADFL	SEM_L1_3_4nm_slices18to283_EM 99	105
AWBL	ADFL	SEM_L1_3_4nm_slices18to283_EM 100	55
AWBL	ADFL	SEM_L1_3_4nm_slices18to283_EM 101	91
AWBL	ADFL	SEM_L1_3_4nm_slices18to283_EM 102	80
AWBL	ADFL	SEM_L1_3_4nm_slices18to283_EM 109	38
AWBL	ADFL	SEM_L1_3_4nm_slices18to283_EM 110	120
AWBL	ADFL	SEM_L1_3_4nm_slices18to283_EM 111	80
AWBL	ADFL	SEM_L1_3_4nm_slices18to283_EM 113	18
AWBL	ADFL	SEM_L1_3_4nm_slices18to283_EM 141	27
AWBL	ADFL	SEM_L1_3_4nm_slices18to283_EM 142	42
AWBL	ADFL	SEM_L1_3_4nm_slices18to283_EM 143	20
AWBL	ADFL	SEM_L1_3_4nm_slices18to283_EM 144	49
AWBL	ADFL	SEM_L1_3_4nm_slices18to283_EM 145	45
AWBL	ADFL	SEM_L1_3_4nm_slices18to283_EM 146	64
AWBL	ADFL	SEM_L1_3_4nm_slices18to283_EM 147	58
AWBL	ADFL	SEM_L1_3_4nm_slices18to283_EM 148	122
AWBL	ADFL	SEM_L1_3_4nm_slices18to283_EM 149	120
AWBL	ADFL	SEM_L1_3_4nm_slices18to283_EM 166	36
AWBL	ADFL	SEM_L1_3_4nm_slices18to283_EM 167	113
AWBL	ADFL	SEM_L1_3_4nm_slices18to283_EM 168	129
AWBL	ADFL	SEM_L1_3_4nm_slices18to283_EM 169	149
AWBL	ADFL	SEM_L1_3_4nm_slices18to283_EM 170	140
AWBL	ADFL	SEM_L1_3_4nm_slices18to283_EM 171	130
AWBL	ADFL	SEM_L1_3_4nm_slices18to283_EM 172	162
AWBL	ADFL	SEM_L1_3_4nm_slices18to283_EM 173	88
AWBL	ADFL	SEM_L1_3_4nm_slices18to283_EM 174	78
AWBL	ADFL	SEM_L1_3_4nm_slices18to283_EM 175	71
AWBL	ADFL	SEM_L1_3_4nm_slices18to283_EM 176	76
AWBL	ADFL	SEM_L1_3_4nm_slices18to283_EM 177	64
AWBL	ADFL	SEM_L1_3_4nm_slices18to283_EM 178	80
AWBL	ADFL	SEM_L1_3_4nm_slices18to283_EM 179	30
AWBL	ADFL	SEM_L1_3_4nm_slices18to283_EM 180	31
AWBL	ADFL	SEM_L1_3_4nm_slices18to283_EM 181	59
AWBL	ADFL	SEM_L1_3_4nm_slices18to283_EM 182	73
AWBL	ADFL	SEM_L1_3_4nm_slices18to283_EM 183	36
AWBL	ADFL	SEM_L1_3_4nm_slices18to283_EM 184	71
AWBL	ADFL	SEM_L1_3_4nm_slices18to283_EM 185	58
AWBL	ADFL	SEM_L1_3_4nm_slices18to283_EM 186	103
AWBL	ADFL	SEM_L1_3_4nm_slices18to283_EM 187	84
AWBL	ADFL	SEM_L1_3_4nm_slices18to283_EM 188	88
AWBL	ADFL	SEM_L1_3_4nm_slices18to283_EM 189	99
AWBL	ADFL	SEM_L1_3_4nm_slices18to283_EM 190	114
AWBL	ADFL	SEM_L1_3_4nm_slices18to283_EM 191	124
AWBL	ADFL	SEM_L1_3_4nm_slices18to283_EM 192	115
AWBL	ADFL	SEM_L1_3_4nm_slices18to283_EM 193	107
AWBL	ADFL	SEM_L1_3_4nm_slices18to283_EM 194	88
AWBL	ADFL	SEM_L1_3_4nm_slices18to283_EM 195	89
AWBL	ADFL	SEM_L1_3_4nm_slices18to283_EM 196	82
AWBL	ADFL	SEM_L1_3_4nm_slices18to283_EM 197	87
AWBL	ADFL	SEM_L1_3_4nm_slices18to283_EM 198	83
AWBL	ADFL	SEM_L1_3_4nm_slices18to283_EM 199	104
AWBL	ADFL	SEM_L1_3_4nm_slices18to283_EM 200	112
AWBL	ADFL	SEM_L1_3_4nm_slices18to283_EM 201	124
AWBL	ADFL	SEM_L1_3_4nm_slices18to283_EM 202	140
AWBL	ADFL	SEM_L1_3_4nm_slices18to283_EM 203	140
AWBL	ADFL	SEM_L1_3_4nm_slices18to283_EM 204	141
AWBL	ADFL	SEM_L1_3_4nm_slices18to283_EM 205	155
AWBL	ADFL	SEM_L1_3_4nm_slices18to283_EM 206	163
AWBL	ADFL	SEM_L1_3_4nm_slices18to283_EM 207	160
AWBL	ADFL	SEM_L1_3_4nm_slices18to283_EM 208	159
AWBL	ADFL	SEM_L1_3_4nm_slices18to283_EM 209	158
AWBL	ADFL	SEM_L1_3_4nm_slices18to283_EM 210	165
AWBL	ADFL	SEM_L1_3_4nm_slices18to283_EM 211	151
AWBL	ADFL	SEM_L1_3_4nm_slices18to283_EM 212	136
AWBL	ADFL	SEM_L1_3_4nm_slices18to283_EM 213	120
AWBL	ADFL	SEM_L1_3_4nm_slices18to283_EM 214	124
AWBL	ADFL	SEM_L1_3_4nm_slices18to283_EM 215	109
AWBL	ADFL	SEM_L1_3_4nm_slices18to283_EM 216	123
AWBL	ADFL	SEM_L1_3_4nm_slices18to283_EM 217	118
AWBL	ADFL	SEM_L1_3_4nm_slices18to283_EM 218	110
AWBL	ADFL	SEM_L1_3_4nm_slices18to283_EM 219	69
AWBL	ADFL	SEM_L1_3_4nm_slices18to283_EM 220	79
AWBL	ADFL	SEM_L1_3_4nm_slices18to283_EM 221	67
AWBL	ADFL	SEM_L1_3_4nm_slices18to283_EM 222	44
AWCL	ADFL	SEM_L1_3_4nm_slices18to283_EM 206	8
AWCL	ADFL	SEM_L1_3_4nm_slices18to283_EM 207	49
AWCL	ADFL	SEM_L1_3_4nm_slices18to283_EM 208	54
AWCL	ADFL	SEM_L1_3_4nm_slices18to283_EM 209	59
AWCL	ADFL	SEM_L1_3_4nm_slices18to283_EM 210	40
AWCL	ADFL	SEM_L1_3_4nm_slices18to283_EM 211	8
DVA	ADFL	SEM_L1_3_4nm_slices18to283_EM 88	18
DVA	ADFL	SEM_L1_3_4nm_slices18to283_EM 89	26
PVPL	ADFL	SEM_L1_3_4nm_slices18to283_EM 109	46
PVPL	ADFL	SEM_L1_3_4nm_slices18to283_EM 110	72
PVPL	ADFL	SEM_L1_3_4nm_slices18to283_EM 111	85
PVPL	ADFL	SEM_L1_3_4nm_slices18to283_EM 112	92
PVPL	ADFL	SEM_L1_3_4nm_slices18to283_EM 113	142
PVPL	ADFL	SEM_L1_3_4nm_slices18to283_EM 114	351
PVPL	ADFL	SEM_L1_3_4nm_slices18to283_EM 115	376
PVPL	ADFL	SEM_L1_3_4nm_slices18to283_EM 116	235
PVPL	ADFL	SEM_L1_3_4nm_slices18to283_EM 117	144
RIBL	ADFL	SEM_L1_3_4nm_slices18to283_EM 85	53
RIBL	ADFL	SEM_L1_3_4nm_slices18to283_EM 193	34
RIBL	ADFL	SEM_L1_3_4nm_slices18to283_EM 194	36
RIBL	ADFL	SEM_L1_3_4nm_slices18to283_EM 195	58
RIBL	ADFL	SEM_L1_3_4nm_slices18to283_EM 196	61
RIBL	ADFL	SEM_L1_3_4nm_slices18to283_EM 197	62
RIBL	ADFL	SEM_L1_3_4nm_slices18to283_EM 198	66
RIBL	ADFL	SEM_L1_3_4nm_slices18to283_EM 199	60
RIBL	ADFL	SEM_L1_3_4nm_slices18to283_EM 200	45
RIBL	ADFL	SEM_L1_3_4nm_slices18to283_EM 201	42
RIBL	ADFL	SEM_L1_3_4nm_slices18to283_EM 202	37
RIBL	ADFL	SEM_L1_3_4nm_slices18to283_EM 215	25
RIBL	ADFL	SEM_L1_3_4nm_slices18to283_EM 216	38
RIBL	ADFL	SEM_L1_3_4nm_slices18to283_EM 217	69
RIBL	ADFL	SEM_L1_3_4nm_slices18to283_EM 218	82
RIBL	ADFL	SEM_L1_3_4nm_slices18to283_EM 219	67
RIBL	ADFL	SEM_L1_3_4nm_slices18to283_EM 220	86
RIBL	ADFL	SEM_L1_3_4nm_slices18to283_EM 221	101
RIBL	ADFL	SEM_L1_3_4nm_slices18to283_EM 222	86
RIH	ADFL	SEM_L1_3_4nm_slices18to283_EM 163	44
RIH	ADFL	SEM_L1_3_4nm_slices18to283_EM 164	77
RIH	ADFL	SEM_L1_3_4nm_slices18to283_EM 165	52
ADAR	ADFR	SEM_L1_3_4nm_slices18to283_EM 85	66
ADAR	ADFR	SEM_L1_3_4nm_slices18to283_EM 86	105
ADFL	ADFR	SEM_L1_3_4nm_slices18to283_EM 83	77
ADFL	ADFR	SEM_L1_3_4nm_slices18to283_EM 85	71
ADFL	ADFR	SEM_L1_3_4nm_slices18to283_EM 86	72
ADFL	ADFR	SEM_L1_3_4nm_slices18to283_EM 86	141
ADFL	ADFR	SEM_L1_3_4nm_slices18to283_EM 87	291
ADFL	ADFR	SEM_L1_3_4nm_slices18to283_EM 87	70
ADFL	ADFR	SEM_L1_3_4nm_slices18to283_EM 88	276
ADFL	ADFR	SEM_L1_3_4nm_slices18to283_EM 89	245
ADFL	ADFR	SEM_L1_3_4nm_slices18to283_EM 90	294
ADFL	ADFR	SEM_L1_3_4nm_slices18to283_EM 92	263
ADFL	ADFR	SEM_L1_3_4nm_slices18to283_EM 93	107
AFDR	ADFR	SEM_L1_3_4nm_slices18to283_EM 132	67
AFDR	ADFR	SEM_L1_3_4nm_slices18to283_EM 133	85
AFDR	ADFR	SEM_L1_3_4nm_slices18to283_EM 134	111
AFDR	ADFR	SEM_L1_3_4nm_slices18to283_EM 135	121
AFDR	ADFR	SEM_L1_3_4nm_slices18to283_EM 136	115
AFDR	ADFR	SEM_L1_3_4nm_slices18to283_EM 137	124
AFDR	ADFR	SEM_L1_3_4nm_slices18to283_EM 138	137
AFDR	ADFR	SEM_L1_3_4nm_slices18to283_EM 139	139
AFDR	ADFR	SEM_L1_3_4nm_slices18to283_EM 140	116
AFDR	ADFR	SEM_L1_3_4nm_slices18to283_EM 143	151
AIBR	ADFR	SEM_L1_3_4nm_slices18to283_EM 85	193
AIBR	ADFR	SEM_L1_3_4nm_slices18to283_EM 89	116
AIBR	ADFR	SEM_L1_3_4nm_slices18to283_EM 90	96
AIBR	ADFR	SEM_L1_3_4nm_slices18to283_EM 92	32
AIZR	ADFR	SEM_L1_3_4nm_slices18to283_EM 81	148
AIZR	ADFR	SEM_L1_3_4nm_slices18to283_EM 82	184
AIZR	ADFR	SEM_L1_3_4nm_slices18to283_EM 83	137
AIZR	ADFR	SEM_L1_3_4nm_slices18to283_EM 84	116
AIZR	ADFR	SEM_L1_3_4nm_slices18to283_EM 85	171
AIZR	ADFR	SEM_L1_3_4nm_slices18to283_EM 86	181
AIZR	ADFR	SEM_L1_3_4nm_slices18to283_EM 87	35
AIZR	ADFR	SEM_L1_3_4nm_slices18to283_EM 87	167
AIZR	ADFR	SEM_L1_3_4nm_slices18to283_EM 88	160
AIZR	ADFR	SEM_L1_3_4nm_slices18to283_EM 89	72
AIZR	ADFR	SEM_L1_3_4nm_slices18to283_EM 89	118
AIZR	ADFR	SEM_L1_3_4nm_slices18to283_EM 93	103
AIZR	ADFR	SEM_L1_3_4nm_slices18to283_EM 94	148
AIZR	ADFR	SEM_L1_3_4nm_slices18to283_EM 95	186
AIZR	ADFR	SEM_L1_3_4nm_slices18to283_EM 96	234
AIZR	ADFR	SEM_L1_3_4nm_slices18to283_EM 97	138
AIZR	ADFR	SEM_L1_3_4nm_slices18to283_EM 98	121
AIZR	ADFR	SEM_L1_3_4nm_slices18to283_EM 99	121
AIZR	ADFR	SEM_L1_3_4nm_slices18to283_EM 100	148
AIZR	ADFR	SEM_L1_3_4nm_slices18to283_EM 101	75
AIZR	ADFR	SEM_L1_3_4nm_slices18to283_EM 102	101
AIZR	ADFR	SEM_L1_3_4nm_slices18to283_EM 103	133
AIZR	ADFR	SEM_L1_3_4nm_slices18to283_EM 104	257
AIZR	ADFR	SEM_L1_3_4nm_slices18to283_EM 105	285
AIZR	ADFR	SEM_L1_3_4nm_slices18to283_EM 106	242
AIZR	ADFR	SEM_L1_3_4nm_slices18to283_EM 107	250
AIZR	ADFR	SEM_L1_3_4nm_slices18to283_EM 109	156
AIZR	ADFR	SEM_L1_3_4nm_slices18to283_EM 110	232
AIZR	ADFR	SEM_L1_3_4nm_slices18to283_EM 112	336
AIZR	ADFR	SEM_L1_3_4nm_slices18to283_EM 113	372
AIZR	ADFR	SEM_L1_3_4nm_slices18to283_EM 114	545
AIZR	ADFR	SEM_L1_3_4nm_slices18to283_EM 115	569
AIZR	ADFR	SEM_L1_3_4nm_slices18to283_EM 116	620
AIZR	ADFR	SEM_L1_3_4nm_slices18to283_EM 117	734
AIZR	ADFR	SEM_L1_3_4nm_slices18to283_EM 118	698
AIZR	ADFR	SEM_L1_3_4nm_slices18to283_EM 119	75
AIZR	ADFR	SEM_L1_3_4nm_slices18to283_EM 119	403
AIZR	ADFR	SEM_L1_3_4nm_slices18to283_EM 120	365
AIZR	ADFR	SEM_L1_3_4nm_slices18to283_EM 121	312
AIZR	ADFR	SEM_L1_3_4nm_slices18to283_EM 122	353
AIZR	ADFR	SEM_L1_3_4nm_slices18to283_EM 122	44
AIZR	ADFR	SEM_L1_3_4nm_slices18to283_EM 123	605
AIZR	ADFR	SEM_L1_3_4nm_slices18to283_EM 124	781
AIZR	ADFR	SEM_L1_3_4nm_slices18to283_EM 125	579
AIZR	ADFR	SEM_L1_3_4nm_slices18to283_EM 125	125
AIZR	ADFR	SEM_L1_3_4nm_slices18to283_EM 126	451
AIZR	ADFR	SEM_L1_3_4nm_slices18to283_EM 126	188
AIZR	ADFR	SEM_L1_3_4nm_slices18to283_EM 127	251
AIZR	ADFR	SEM_L1_3_4nm_slices18to283_EM 127	201
AIZR	ADFR	SEM_L1_3_4nm_slices18to283_EM 127	125
AIZR	ADFR	SEM_L1_3_4nm_slices18to283_EM 128	156
AIZR	ADFR	SEM_L1_3_4nm_slices18to283_EM 128	131
AIZR	ADFR	SEM_L1_3_4nm_slices18to283_EM 129	53
AIZR	ADFR	SEM_L1_3_4nm_slices18to283_EM 129	143
AIZR	ADFR	SEM_L1_3_4nm_slices18to283_EM 130	148
AIZR	ADFR	SEM_L1_3_4nm_slices18to283_EM 131	169
AIZR	ADFR	SEM_L1_3_4nm_slices18to283_EM 132	154
AIZR	ADFR	SEM_L1_3_4nm_slices18to283_EM 133	139
AIZR	ADFR	SEM_L1_3_4nm_slices18to283_EM 134	138
AIZR	ADFR	SEM_L1_3_4nm_slices18to283_EM 135	127
AIZR	ADFR	SEM_L1_3_4nm_slices18to283_EM 136	118
AIZR	ADFR	SEM_L1_3_4nm_slices18to283_EM 137	88
AIZR	ADFR	SEM_L1_3_4nm_slices18to283_EM 138	113
AIZR	ADFR	SEM_L1_3_4nm_slices18to283_EM 139	111
AIZR	ADFR	SEM_L1_3_4nm_slices18to283_EM 140	163
AIZR	ADFR	SEM_L1_3_4nm_slices18to283_EM 141	329
AIZR	ADFR	SEM_L1_3_4nm_slices18to283_EM 142	311
AIZR	ADFR	SEM_L1_3_4nm_slices18to283_EM 143	277
AIZR	ADFR	SEM_L1_3_4nm_slices18to283_EM 144	74
AIZR	ADFR	SEM_L1_3_4nm_slices18to283_EM 145	40
AIZR	ADFR	SEM_L1_3_4nm_slices18to283_EM 146	93
AIZR	ADFR	SEM_L1_3_4nm_slices18to283_EM 146	163
AIZR	ADFR	SEM_L1_3_4nm_slices18to283_EM 147	403
AIZR	ADFR	SEM_L1_3_4nm_slices18to283_EM 148	514
AIZR	ADFR	SEM_L1_3_4nm_slices18to283_EM 149	536
AIZR	ADFR	SEM_L1_3_4nm_slices18to283_EM 150	559
AIZR	ADFR	SEM_L1_3_4nm_slices18to283_EM 151	626
AIZR	ADFR	SEM_L1_3_4nm_slices18to283_EM 152	40
AIZR	ADFR	SEM_L1_3_4nm_slices18to283_EM 152	504
AIZR	ADFR	SEM_L1_3_4nm_slices18to283_EM 153	472
AIZR	ADFR	SEM_L1_3_4nm_slices18to283_EM 154	445
AIZR	ADFR	SEM_L1_3_4nm_slices18to283_EM 155	441
AIZR	ADFR	SEM_L1_3_4nm_slices18to283_EM 156	423
AIZR	ADFR	SEM_L1_3_4nm_slices18to283_EM 157	398
AIZR	ADFR	SEM_L1_3_4nm_slices18to283_EM 158	404
AIZR	ADFR	SEM_L1_3_4nm_slices18to283_EM 159	389
AIZR	ADFR	SEM_L1_3_4nm_slices18to283_EM 160	381
AIZR	ADFR	SEM_L1_3_4nm_slices18to283_EM 161	380
AIZR	ADFR	SEM_L1_3_4nm_slices18to283_EM 162	349
AIZR	ADFR	SEM_L1_3_4nm_slices18to283_EM 163	365
AIZR	ADFR	SEM_L1_3_4nm_slices18to283_EM 164	360
AIZR	ADFR	SEM_L1_3_4nm_slices18to283_EM 165	333
AIZR	ADFR	SEM_L1_3_4nm_slices18to283_EM 166	321
AIZR	ADFR	SEM_L1_3_4nm_slices18to283_EM 167	321
AIZR	ADFR	SEM_L1_3_4nm_slices18to283_EM 168	310
AIZR	ADFR	SEM_L1_3_4nm_slices18to283_EM 169	307
AIZR	ADFR	SEM_L1_3_4nm_slices18to283_EM 170	299
AIZR	ADFR	SEM_L1_3_4nm_slices18to283_EM 171	249
AIZR	ADFR	SEM_L1_3_4nm_slices18to283_EM 172	243
AIZR	ADFR	SEM_L1_3_4nm_slices18to283_EM 173	238
AIZR	ADFR	SEM_L1_3_4nm_slices18to283_EM 174	199
AIZR	ADFR	SEM_L1_3_4nm_slices18to283_EM 175	211
AIZR	ADFR	SEM_L1_3_4nm_slices18to283_EM 176	181
AIZR	ADFR	SEM_L1_3_4nm_slices18to283_EM 177	175
AIZR	ADFR	SEM_L1_3_4nm_slices18to283_EM 178	152
AIZR	ADFR	SEM_L1_3_4nm_slices18to283_EM 179	129
AIZR	ADFR	SEM_L1_3_4nm_slices18to283_EM 180	124
AIZR	ADFR	SEM_L1_3_4nm_slices18to283_EM 181	127
AIZR	ADFR	SEM_L1_3_4nm_slices18to283_EM 182	107
AIZR	ADFR	SEM_L1_3_4nm_slices18to283_EM 183	104
AIZR	ADFR	SEM_L1_3_4nm_slices18to283_EM 184	93
AIZR	ADFR	SEM_L1_3_4nm_slices18to283_EM 185	98
AIZR	ADFR	SEM_L1_3_4nm_slices18to283_EM 186	115
AIZR	ADFR	SEM_L1_3_4nm_slices18to283_EM 187	99
AIZR	ADFR	SEM_L1_3_4nm_slices18to283_EM 188	109
AIZR	ADFR	SEM_L1_3_4nm_slices18to283_EM 189	102
AIZR	ADFR	SEM_L1_3_4nm_slices18to283_EM 190	113
AIZR	ADFR	SEM_L1_3_4nm_slices18to283_EM 191	101
AIZR	ADFR	SEM_L1_3_4nm_slices18to283_EM 192	112
AIZR	ADFR	SEM_L1_3_4nm_slices18to283_EM 193	104
AIZR	ADFR	SEM_L1_3_4nm_slices18to283_EM 194	109
AIZR	ADFR	SEM_L1_3_4nm_slices18to283_EM 195	103
AIZR	ADFR	SEM_L1_3_4nm_slices18to283_EM 196	105
AIZR	ADFR	SEM_L1_3_4nm_slices18to283_EM 197	113
AIZR	ADFR	SEM_L1_3_4nm_slices18to283_EM 198	115
AIZR	ADFR	SEM_L1_3_4nm_slices18to283_EM 199	120
AIZR	ADFR	SEM_L1_3_4nm_slices18to283_EM 200	125
AIZR	ADFR	SEM_L1_3_4nm_slices18to283_EM 201	118
AIZR	ADFR	SEM_L1_3_4nm_slices18to283_EM 202	121
AIZR	ADFR	SEM_L1_3_4nm_slices18to283_EM 203	101
AIZR	ADFR	SEM_L1_3_4nm_slices18to283_EM 204	97
AIZR	ADFR	SEM_L1_3_4nm_slices18to283_EM 205	95
AIZR	ADFR	SEM_L1_3_4nm_slices18to283_EM 206	94
AIZR	ADFR	SEM_L1_3_4nm_slices18to283_EM 207	99
AIZR	ADFR	SEM_L1_3_4nm_slices18to283_EM 208	84
AIZR	ADFR	SEM_L1_3_4nm_slices18to283_EM 209	97
AIZR	ADFR	SEM_L1_3_4nm_slices18to283_EM 210	88
AIZR	ADFR	SEM_L1_3_4nm_slices18to283_EM 211	126
AIZR	ADFR	SEM_L1_3_4nm_slices18to283_EM 212	90
AIZR	ADFR	SEM_L1_3_4nm_slices18to283_EM 213	88
AIZR	ADFR	SEM_L1_3_4nm_slices18to283_EM 214	85
AIZR	ADFR	SEM_L1_3_4nm_slices18to283_EM 215	97
AIZR	ADFR	SEM_L1_3_4nm_slices18to283_EM 216	74
AIZR	ADFR	SEM_L1_3_4nm_slices18to283_EM 217	77
AIZR	ADFR	SEM_L1_3_4nm_slices18to283_EM 218	66
AIZR	ADFR	SEM_L1_3_4nm_slices18to283_EM 219	61
AIZR	ADFR	SEM_L1_3_4nm_slices18to283_EM 220	53
AIZR	ADFR	SEM_L1_3_4nm_slices18to283_EM 221	72
AIZR	ADFR	SEM_L1_3_4nm_slices18to283_EM 222	68
ASER	ADFR	SEM_L1_3_4nm_slices18to283_EM 90	97
ASER	ADFR	SEM_L1_3_4nm_slices18to283_EM 92	373
ASER	ADFR	SEM_L1_3_4nm_slices18to283_EM 93	270
ASER	ADFR	SEM_L1_3_4nm_slices18to283_EM 94	122
ASER	ADFR	SEM_L1_3_4nm_slices18to283_EM 94	94
ASER	ADFR	SEM_L1_3_4nm_slices18to283_EM 95	70
ASER	ADFR	SEM_L1_3_4nm_slices18to283_EM 96	50
ASER	ADFR	SEM_L1_3_4nm_slices18to283_EM 109	34
ASER	ADFR	SEM_L1_3_4nm_slices18to283_EM 110	63
ASER	ADFR	SEM_L1_3_4nm_slices18to283_EM 119	137
ASER	ADFR	SEM_L1_3_4nm_slices18to283_EM 120	232
ASER	ADFR	SEM_L1_3_4nm_slices18to283_EM 121	137
ASER	ADFR	SEM_L1_3_4nm_slices18to283_EM 122	153
ASER	ADFR	SEM_L1_3_4nm_slices18to283_EM 123	187
ASER	ADFR	SEM_L1_3_4nm_slices18to283_EM 124	192
ASER	ADFR	SEM_L1_3_4nm_slices18to283_EM 125	163
ASER	ADFR	SEM_L1_3_4nm_slices18to283_EM 125	111
ASER	ADFR	SEM_L1_3_4nm_slices18to283_EM 126	197
ASER	ADFR	SEM_L1_3_4nm_slices18to283_EM 126	82
ASER	ADFR	SEM_L1_3_4nm_slices18to283_EM 126	119
ASER	ADFR	SEM_L1_3_4nm_slices18to283_EM 127	166
ASER	ADFR	SEM_L1_3_4nm_slices18to283_EM 127	119
ASER	ADFR	SEM_L1_3_4nm_slices18to283_EM 128	140
ASER	ADFR	SEM_L1_3_4nm_slices18to283_EM 128	34
ASER	ADFR	SEM_L1_3_4nm_slices18to283_EM 129	111
ASER	ADFR	SEM_L1_3_4nm_slices18to283_EM 130	82
ASER	ADFR	SEM_L1_3_4nm_slices18to283_EM 130	57
ASER	ADFR	SEM_L1_3_4nm_slices18to283_EM 131	62
ASER	ADFR	SEM_L1_3_4nm_slices18to283_EM 132	88
ASER	ADFR	SEM_L1_3_4nm_slices18to283_EM 133	71
ASER	ADFR	SEM_L1_3_4nm_slices18to283_EM 134	102
ASER	ADFR	SEM_L1_3_4nm_slices18to283_EM 135	49
ASER	ADFR	SEM_L1_3_4nm_slices18to283_EM 210	46
ASER	ADFR	SEM_L1_3_4nm_slices18to283_EM 211	70
ASER	ADFR	SEM_L1_3_4nm_slices18to283_EM 212	78
ASER	ADFR	SEM_L1_3_4nm_slices18to283_EM 213	85
ASER	ADFR	SEM_L1_3_4nm_slices18to283_EM 214	19
ASER	ADFR	SEM_L1_3_4nm_slices18to283_EM 220	63
ASER	ADFR	SEM_L1_3_4nm_slices18to283_EM 221	101
ASER	ADFR	SEM_L1_3_4nm_slices18to283_EM 222	93
ASHR	ADFR	SEM_L1_3_4nm_slices18to283_EM 112	160
ASHR	ADFR	SEM_L1_3_4nm_slices18to283_EM 113	233
ASHR	ADFR	SEM_L1_3_4nm_slices18to283_EM 114	278
ASHR	ADFR	SEM_L1_3_4nm_slices18to283_EM 115	243
ASHR	ADFR	SEM_L1_3_4nm_slices18to283_EM 123	23
ASHR	ADFR	SEM_L1_3_4nm_slices18to283_EM 124	40
ASHR	ADFR	SEM_L1_3_4nm_slices18to283_EM 162	71
ASHR	ADFR	SEM_L1_3_4nm_slices18to283_EM 163	69
ASHR	ADFR	SEM_L1_3_4nm_slices18to283_EM 164	70
ASHR	ADFR	SEM_L1_3_4nm_slices18to283_EM 165	46
ASHR	ADFR	SEM_L1_3_4nm_slices18to283_EM 166	15
AVHL	ADFR	SEM_L1_3_4nm_slices18to283_EM 93	75
AVHL	ADFR	SEM_L1_3_4nm_slices18to283_EM 94	109
AVHL	ADFR	SEM_L1_3_4nm_slices18to283_EM 96	321
AVHL	ADFR	SEM_L1_3_4nm_slices18to283_EM 97	335
AVHL	ADFR	SEM_L1_3_4nm_slices18to283_EM 98	329
AVHL	ADFR	SEM_L1_3_4nm_slices18to283_EM 99	290
AVHL	ADFR	SEM_L1_3_4nm_slices18to283_EM 100	200
AVHL	ADFR	SEM_L1_3_4nm_slices18to283_EM 101	111
AVHL	ADFR	SEM_L1_3_4nm_slices18to283_EM 102	79
AVHL	ADFR	SEM_L1_3_4nm_slices18to283_EM 104	130
AVHL	ADFR	SEM_L1_3_4nm_slices18to283_EM 105	194
AVHL	ADFR	SEM_L1_3_4nm_slices18to283_EM 106	110
AVHL	ADFR	SEM_L1_3_4nm_slices18to283_EM 107	112
AVHL	ADFR	SEM_L1_3_4nm_slices18to283_EM 109	107
AVHL	ADFR	SEM_L1_3_4nm_slices18to283_EM 110	116
AVHL	ADFR	SEM_L1_3_4nm_slices18to283_EM 112	10
AVHL	ADFR	SEM_L1_3_4nm_slices18to283_EM 115	288
AVHL	ADFR	SEM_L1_3_4nm_slices18to283_EM 116	354
AVHL	ADFR	SEM_L1_3_4nm_slices18to283_EM 117	280
AVHL	ADFR	SEM_L1_3_4nm_slices18to283_EM 118	112
AVHL	ADFR	SEM_L1_3_4nm_slices18to283_EM 120	22
AVHL	ADFR	SEM_L1_3_4nm_slices18to283_EM 121	260
AVHL	ADFR	SEM_L1_3_4nm_slices18to283_EM 122	434
AVHL	ADFR	SEM_L1_3_4nm_slices18to283_EM 123	473
AVHL	ADFR	SEM_L1_3_4nm_slices18to283_EM 124	512
AVHL	ADFR	SEM_L1_3_4nm_slices18to283_EM 125	442
AVHL	ADFR	SEM_L1_3_4nm_slices18to283_EM 126	254
AVHL	ADFR	SEM_L1_3_4nm_slices18to283_EM 127	92
AWAR	ADFR	SEM_L1_3_4nm_slices18to283_EM 128	134
AWAR	ADFR	SEM_L1_3_4nm_slices18to283_EM 129	47
AWAR	ADFR	SEM_L1_3_4nm_slices18to283_EM 130	49
AWAR	ADFR	SEM_L1_3_4nm_slices18to283_EM 131	51
AWAR	ADFR	SEM_L1_3_4nm_slices18to283_EM 132	45
AWAR	ADFR	SEM_L1_3_4nm_slices18to283_EM 133	48
AWAR	ADFR	SEM_L1_3_4nm_slices18to283_EM 134	45
AWAR	ADFR	SEM_L1_3_4nm_slices18to283_EM 156	190
AWAR	ADFR	SEM_L1_3_4nm_slices18to283_EM 157	145
AWAR	ADFR	SEM_L1_3_4nm_slices18to283_EM 158	159
AWAR	ADFR	SEM_L1_3_4nm_slices18to283_EM 159	166
AWAR	ADFR	SEM_L1_3_4nm_slices18to283_EM 160	181
AWAR	ADFR	SEM_L1_3_4nm_slices18to283_EM 161	191
AWAR	ADFR	SEM_L1_3_4nm_slices18to283_EM 162	199
AWAR	ADFR	SEM_L1_3_4nm_slices18to283_EM 163	170
AWAR	ADFR	SEM_L1_3_4nm_slices18to283_EM 164	187
AWAR	ADFR	SEM_L1_3_4nm_slices18to283_EM 165	184
AWAR	ADFR	SEM_L1_3_4nm_slices18to283_EM 166	172
AWAR	ADFR	SEM_L1_3_4nm_slices18to283_EM 167	184
AWAR	ADFR	SEM_L1_3_4nm_slices18to283_EM 168	166
AWAR	ADFR	SEM_L1_3_4nm_slices18to283_EM 169	173
AWAR	ADFR	SEM_L1_3_4nm_slices18to283_EM 170	143
AWAR	ADFR	SEM_L1_3_4nm_slices18to283_EM 171	127
AWAR	ADFR	SEM_L1_3_4nm_slices18to283_EM 172	119
AWAR	ADFR	SEM_L1_3_4nm_slices18to283_EM 173	107
AWAR	ADFR	SEM_L1_3_4nm_slices18to283_EM 174	90
AWAR	ADFR	SEM_L1_3_4nm_slices18to283_EM 175	85
AWAR	ADFR	SEM_L1_3_4nm_slices18to283_EM 176	64
AWAR	ADFR	SEM_L1_3_4nm_slices18to283_EM 177	59
AWAR	ADFR	SEM_L1_3_4nm_slices18to283_EM 178	63
AWAR	ADFR	SEM_L1_3_4nm_slices18to283_EM 179	57
AWAR	ADFR	SEM_L1_3_4nm_slices18to283_EM 180	55
AWAR	ADFR	SEM_L1_3_4nm_slices18to283_EM 181	34
AWAR	ADFR	SEM_L1_3_4nm_slices18to283_EM 182	75
AWAR	ADFR	SEM_L1_3_4nm_slices18to283_EM 183	45
AWAR	ADFR	SEM_L1_3_4nm_slices18to283_EM 184	57
AWAR	ADFR	SEM_L1_3_4nm_slices18to283_EM 185	51
AWAR	ADFR	SEM_L1_3_4nm_slices18to283_EM 186	64
AWAR	ADFR	SEM_L1_3_4nm_slices18to283_EM 187	75
AWAR	ADFR	SEM_L1_3_4nm_slices18to283_EM 188	64
AWAR	ADFR	SEM_L1_3_4nm_slices18to283_EM 189	62
AWAR	ADFR	SEM_L1_3_4nm_slices18to283_EM 190	74
AWAR	ADFR	SEM_L1_3_4nm_slices18to283_EM 191	76
AWAR	ADFR	SEM_L1_3_4nm_slices18to283_EM 192	78
AWAR	ADFR	SEM_L1_3_4nm_slices18to283_EM 193	77
AWAR	ADFR	SEM_L1_3_4nm_slices18to283_EM 194	91
AWAR	ADFR	SEM_L1_3_4nm_slices18to283_EM 195	85
AWAR	ADFR	SEM_L1_3_4nm_slices18to283_EM 196	87
AWAR	ADFR	SEM_L1_3_4nm_slices18to283_EM 197	101
AWAR	ADFR	SEM_L1_3_4nm_slices18to283_EM 198	99
AWAR	ADFR	SEM_L1_3_4nm_slices18to283_EM 199	94
AWAR	ADFR	SEM_L1_3_4nm_slices18to283_EM 200	99
AWAR	ADFR	SEM_L1_3_4nm_slices18to283_EM 201	95
AWAR	ADFR	SEM_L1_3_4nm_slices18to283_EM 202	102
AWAR	ADFR	SEM_L1_3_4nm_slices18to283_EM 203	88
AWAR	ADFR	SEM_L1_3_4nm_slices18to283_EM 204	101
AWAR	ADFR	SEM_L1_3_4nm_slices18to283_EM 205	85
AWAR	ADFR	SEM_L1_3_4nm_slices18to283_EM 206	79
AWAR	ADFR	SEM_L1_3_4nm_slices18to283_EM 207	87
AWAR	ADFR	SEM_L1_3_4nm_slices18to283_EM 208	87
AWAR	ADFR	SEM_L1_3_4nm_slices18to283_EM 209	86
AWAR	ADFR	SEM_L1_3_4nm_slices18to283_EM 210	88
AWAR	ADFR	SEM_L1_3_4nm_slices18to283_EM 211	83
AWAR	ADFR	SEM_L1_3_4nm_slices18to283_EM 212	95
AWAR	ADFR	SEM_L1_3_4nm_slices18to283_EM 213	102
AWAR	ADFR	SEM_L1_3_4nm_slices18to283_EM 214	100
AWAR	ADFR	SEM_L1_3_4nm_slices18to283_EM 215	92
AWAR	ADFR	SEM_L1_3_4nm_slices18to283_EM 216	97
AWAR	ADFR	SEM_L1_3_4nm_slices18to283_EM 217	118
AWAR	ADFR	SEM_L1_3_4nm_slices18to283_EM 218	91
AWAR	ADFR	SEM_L1_3_4nm_slices18to283_EM 219	75
AWAR	ADFR	SEM_L1_3_4nm_slices18to283_EM 220	33
AWBL	ADFR	SEM_L1_3_4nm_slices18to283_EM 93	71
AWBR	ADFR	SEM_L1_3_4nm_slices18to283_EM 90	221
AWBR	ADFR	SEM_L1_3_4nm_slices18to283_EM 92	33
AWBR	ADFR	SEM_L1_3_4nm_slices18to283_EM 92	190
AWBR	ADFR	SEM_L1_3_4nm_slices18to283_EM 93	97
AWBR	ADFR	SEM_L1_3_4nm_slices18to283_EM 93	166
AWBR	ADFR	SEM_L1_3_4nm_slices18to283_EM 94	64
AWBR	ADFR	SEM_L1_3_4nm_slices18to283_EM 98	61
AWBR	ADFR	SEM_L1_3_4nm_slices18to283_EM 100	115
AWBR	ADFR	SEM_L1_3_4nm_slices18to283_EM 101	107
AWBR	ADFR	SEM_L1_3_4nm_slices18to283_EM 103	119
AWBR	ADFR	SEM_L1_3_4nm_slices18to283_EM 104	137
AWBR	ADFR	SEM_L1_3_4nm_slices18to283_EM 105	125
AWBR	ADFR	SEM_L1_3_4nm_slices18to283_EM 106	180
AWBR	ADFR	SEM_L1_3_4nm_slices18to283_EM 107	168
AWBR	ADFR	SEM_L1_3_4nm_slices18to283_EM 109	43
AWBR	ADFR	SEM_L1_3_4nm_slices18to283_EM 110	151
AWBR	ADFR	SEM_L1_3_4nm_slices18to283_EM 112	108
AWBR	ADFR	SEM_L1_3_4nm_slices18to283_EM 113	73
AWBR	ADFR	SEM_L1_3_4nm_slices18to283_EM 114	69
AWBR	ADFR	SEM_L1_3_4nm_slices18to283_EM 115	49
AWBR	ADFR	SEM_L1_3_4nm_slices18to283_EM 125	319
AWBR	ADFR	SEM_L1_3_4nm_slices18to283_EM 126	633
AWBR	ADFR	SEM_L1_3_4nm_slices18to283_EM 127	400
AWBR	ADFR	SEM_L1_3_4nm_slices18to283_EM 128	346
AWBR	ADFR	SEM_L1_3_4nm_slices18to283_EM 129	243
AWBR	ADFR	SEM_L1_3_4nm_slices18to283_EM 129	50
AWBR	ADFR	SEM_L1_3_4nm_slices18to283_EM 130	108
AWBR	ADFR	SEM_L1_3_4nm_slices18to283_EM 130	39
AWBR	ADFR	SEM_L1_3_4nm_slices18to283_EM 131	27
AWBR	ADFR	SEM_L1_3_4nm_slices18to283_EM 132	48
AWBR	ADFR	SEM_L1_3_4nm_slices18to283_EM 136	121
AWBR	ADFR	SEM_L1_3_4nm_slices18to283_EM 137	93
AWBR	ADFR	SEM_L1_3_4nm_slices18to283_EM 138	97
AWBR	ADFR	SEM_L1_3_4nm_slices18to283_EM 139	76
AWBR	ADFR	SEM_L1_3_4nm_slices18to283_EM 140	50
AWBR	ADFR	SEM_L1_3_4nm_slices18to283_EM 141	55
AWBR	ADFR	SEM_L1_3_4nm_slices18to283_EM 143	95
AWBR	ADFR	SEM_L1_3_4nm_slices18to283_EM 148	82
AWBR	ADFR	SEM_L1_3_4nm_slices18to283_EM 149	176
AWBR	ADFR	SEM_L1_3_4nm_slices18to283_EM 150	231
AWBR	ADFR	SEM_L1_3_4nm_slices18to283_EM 151	268
AWBR	ADFR	SEM_L1_3_4nm_slices18to283_EM 152	243
AWBR	ADFR	SEM_L1_3_4nm_slices18to283_EM 153	267
AWBR	ADFR	SEM_L1_3_4nm_slices18to283_EM 154	225
AWBR	ADFR	SEM_L1_3_4nm_slices18to283_EM 155	187
AWBR	ADFR	SEM_L1_3_4nm_slices18to283_EM 156	142
AWBR	ADFR	SEM_L1_3_4nm_slices18to283_EM 157	154
AWBR	ADFR	SEM_L1_3_4nm_slices18to283_EM 158	150
AWBR	ADFR	SEM_L1_3_4nm_slices18to283_EM 159	148
AWBR	ADFR	SEM_L1_3_4nm_slices18to283_EM 160	145
AWBR	ADFR	SEM_L1_3_4nm_slices18to283_EM 161	151
AWBR	ADFR	SEM_L1_3_4nm_slices18to283_EM 162	132
AWBR	ADFR	SEM_L1_3_4nm_slices18to283_EM 163	135
AWBR	ADFR	SEM_L1_3_4nm_slices18to283_EM 164	128
AWBR	ADFR	SEM_L1_3_4nm_slices18to283_EM 165	135
AWBR	ADFR	SEM_L1_3_4nm_slices18to283_EM 166	142
AWBR	ADFR	SEM_L1_3_4nm_slices18to283_EM 167	134
AWBR	ADFR	SEM_L1_3_4nm_slices18to283_EM 168	147
AWBR	ADFR	SEM_L1_3_4nm_slices18to283_EM 169	120
AWBR	ADFR	SEM_L1_3_4nm_slices18to283_EM 170	142
AWBR	ADFR	SEM_L1_3_4nm_slices18to283_EM 171	111
AWBR	ADFR	SEM_L1_3_4nm_slices18to283_EM 172	118
AWBR	ADFR	SEM_L1_3_4nm_slices18to283_EM 173	139
AWBR	ADFR	SEM_L1_3_4nm_slices18to283_EM 174	118
AWBR	ADFR	SEM_L1_3_4nm_slices18to283_EM 175	122
AWBR	ADFR	SEM_L1_3_4nm_slices18to283_EM 176	123
AWBR	ADFR	SEM_L1_3_4nm_slices18to283_EM 177	115
AWBR	ADFR	SEM_L1_3_4nm_slices18to283_EM 178	120
AWBR	ADFR	SEM_L1_3_4nm_slices18to283_EM 179	108
AWBR	ADFR	SEM_L1_3_4nm_slices18to283_EM 180	108
AWBR	ADFR	SEM_L1_3_4nm_slices18to283_EM 181	102
AWBR	ADFR	SEM_L1_3_4nm_slices18to283_EM 182	96
AWBR	ADFR	SEM_L1_3_4nm_slices18to283_EM 183	93
AWBR	ADFR	SEM_L1_3_4nm_slices18to283_EM 184	95
AWBR	ADFR	SEM_L1_3_4nm_slices18to283_EM 185	103
AWBR	ADFR	SEM_L1_3_4nm_slices18to283_EM 186	98
AWBR	ADFR	SEM_L1_3_4nm_slices18to283_EM 187	97
AWBR	ADFR	SEM_L1_3_4nm_slices18to283_EM 188	103
AWBR	ADFR	SEM_L1_3_4nm_slices18to283_EM 189	102
AWBR	ADFR	SEM_L1_3_4nm_slices18to283_EM 190	80
AWBR	ADFR	SEM_L1_3_4nm_slices18to283_EM 191	92
AWBR	ADFR	SEM_L1_3_4nm_slices18to283_EM 192	74
AWBR	ADFR	SEM_L1_3_4nm_slices18to283_EM 193	81
AWBR	ADFR	SEM_L1_3_4nm_slices18to283_EM 195	82
AWBR	ADFR	SEM_L1_3_4nm_slices18to283_EM 196	73
AWBR	ADFR	SEM_L1_3_4nm_slices18to283_EM 197	78
AWBR	ADFR	SEM_L1_3_4nm_slices18to283_EM 198	88
AWBR	ADFR	SEM_L1_3_4nm_slices18to283_EM 199	71
AWBR	ADFR	SEM_L1_3_4nm_slices18to283_EM 200	83
AWBR	ADFR	SEM_L1_3_4nm_slices18to283_EM 201	64
AWBR	ADFR	SEM_L1_3_4nm_slices18to283_EM 202	73
AWBR	ADFR	SEM_L1_3_4nm_slices18to283_EM 203	62
AWBR	ADFR	SEM_L1_3_4nm_slices18to283_EM 204	67
AWBR	ADFR	SEM_L1_3_4nm_slices18to283_EM 205	75
AWBR	ADFR	SEM_L1_3_4nm_slices18to283_EM 206	69
AWBR	ADFR	SEM_L1_3_4nm_slices18to283_EM 207	81
AWBR	ADFR	SEM_L1_3_4nm_slices18to283_EM 208	101
AWBR	ADFR	SEM_L1_3_4nm_slices18to283_EM 209	79
AWBR	ADFR	SEM_L1_3_4nm_slices18to283_EM 210	103
AWBR	ADFR	SEM_L1_3_4nm_slices18to283_EM 211	89
AWBR	ADFR	SEM_L1_3_4nm_slices18to283_EM 212	81
AWBR	ADFR	SEM_L1_3_4nm_slices18to283_EM 213	73
AWBR	ADFR	SEM_L1_3_4nm_slices18to283_EM 214	47
AWBR	ADFR	SEM_L1_3_4nm_slices18to283_EM 215	53
AWBR	ADFR	SEM_L1_3_4nm_slices18to283_EM 216	57
AWBR	ADFR	SEM_L1_3_4nm_slices18to283_EM 217	38
DVA	ADFR	SEM_L1_3_4nm_slices18to283_EM 85	47
DVA	ADFR	SEM_L1_3_4nm_slices18to283_EM 86	63
DVA	ADFR	SEM_L1_3_4nm_slices18to283_EM 87	128
DVA	ADFR	SEM_L1_3_4nm_slices18to283_EM 88	98
DVA	ADFR	SEM_L1_3_4nm_slices18to283_EM 89	102
DVA	ADFR	SEM_L1_3_4nm_slices18to283_EM 90	60
DVA	ADFR	SEM_L1_3_4nm_slices18to283_EM 142	32
OLQVR	ADFR	SEM_L1_3_4nm_slices18to283_EM 126	81
RIAR	ADFR	SEM_L1_3_4nm_slices18to283_EM 145	26
RIAR	ADFR	SEM_L1_3_4nm_slices18to283_EM 146	125
RIAR	ADFR	SEM_L1_3_4nm_slices18to283_EM 147	156
RIAR	ADFR	SEM_L1_3_4nm_slices18to283_EM 148	141
RIAR	ADFR	SEM_L1_3_4nm_slices18to283_EM 149	110
RIAR	ADFR	SEM_L1_3_4nm_slices18to283_EM 150	84
RIAR	ADFR	SEM_L1_3_4nm_slices18to283_EM 151	86
RIAR	ADFR	SEM_L1_3_4nm_slices18to283_EM 152	90
RIAR	ADFR	SEM_L1_3_4nm_slices18to283_EM 153	84
RIAR	ADFR	SEM_L1_3_4nm_slices18to283_EM 154	76
RIAR	ADFR	SEM_L1_3_4nm_slices18to283_EM 155	60
RIAR	ADFR	SEM_L1_3_4nm_slices18to283_EM 156	77
RIAR	ADFR	SEM_L1_3_4nm_slices18to283_EM 157	99
RIAR	ADFR	SEM_L1_3_4nm_slices18to283_EM 158	71
RIAR	ADFR	SEM_L1_3_4nm_slices18to283_EM 159	80
RIAR	ADFR	SEM_L1_3_4nm_slices18to283_EM 160	89
RIAR	ADFR	SEM_L1_3_4nm_slices18to283_EM 161	92
RIAR	ADFR	SEM_L1_3_4nm_slices18to283_EM 162	109
RIAR	ADFR	SEM_L1_3_4nm_slices18to283_EM 163	99
RIAR	ADFR	SEM_L1_3_4nm_slices18to283_EM 164	89
RIAR	ADFR	SEM_L1_3_4nm_slices18to283_EM 165	112
RIAR	ADFR	SEM_L1_3_4nm_slices18to283_EM 166	95
RIAR	ADFR	SEM_L1_3_4nm_slices18to283_EM 167	107
RIAR	ADFR	SEM_L1_3_4nm_slices18to283_EM 168	90
RIAR	ADFR	SEM_L1_3_4nm_slices18to283_EM 169	93
RIAR	ADFR	SEM_L1_3_4nm_slices18to283_EM 170	78
RIAR	ADFR	SEM_L1_3_4nm_slices18to283_EM 171	49
RIH	ADFR	SEM_L1_3_4nm_slices18to283_EM 147	12
RIH	ADFR	SEM_L1_3_4nm_slices18to283_EM 148	68
RIH	ADFR	SEM_L1_3_4nm_slices18to283_EM 149	53
RIH	ADFR	SEM_L1_3_4nm_slices18to283_EM 150	68
RIH	ADFR	SEM_L1_3_4nm_slices18to283_EM 151	78
RIH	ADFR	SEM_L1_3_4nm_slices18to283_EM 152	77
RIH	ADFR	SEM_L1_3_4nm_slices18to283_EM 153	70
RIH	ADFR	SEM_L1_3_4nm_slices18to283_EM 154	63
RIH	ADFR	SEM_L1_3_4nm_slices18to283_EM 155	48
SMBDR	ADFR	SEM_L1_3_4nm_slices18to283_EM 172	6
SMBVR	ADFR	SEM_L1_3_4nm_slices18to283_EM 154	21
SMBVR	ADFR	SEM_L1_3_4nm_slices18to283_EM 155	4
SMBVR	ADFR	SEM_L1_3_4nm_slices18to283_EM 156	10
SMBVR	ADFR	SEM_L1_3_4nm_slices18to283_EM 166	68
SMBVR	ADFR	SEM_L1_3_4nm_slices18to283_EM 167	65
SMBVR	ADFR	SEM_L1_3_4nm_slices18to283_EM 168	54
SMBVR	ADFR	SEM_L1_3_4nm_slices18to283_EM 169	65
SMBVR	ADFR	SEM_L1_3_4nm_slices18to283_EM 170	72
SMBVR	ADFR	SEM_L1_3_4nm_slices18to283_EM 171	62
SMBVR	ADFR	SEM_L1_3_4nm_slices18to283_EM 172	64
SMBVR	ADFR	SEM_L1_3_4nm_slices18to283_EM 173	52
SMBVR	ADFR	SEM_L1_3_4nm_slices18to283_EM 174	56
SMBVR	ADFR	SEM_L1_3_4nm_slices18to283_EM 175	50
SMBVR	ADFR	SEM_L1_3_4nm_slices18to283_EM 176	63
SMBVR	ADFR	SEM_L1_3_4nm_slices18to283_EM 177	70
SMBVR	ADFR	SEM_L1_3_4nm_slices18to283_EM 178	85
SMBVR	ADFR	SEM_L1_3_4nm_slices18to283_EM 179	89
SMBVR	ADFR	SEM_L1_3_4nm_slices18to283_EM 180	88
SMBVR	ADFR	SEM_L1_3_4nm_slices18to283_EM 181	84
SMBVR	ADFR	SEM_L1_3_4nm_slices18to283_EM 182	97
SMBVR	ADFR	SEM_L1_3_4nm_slices18to283_EM 183	88
SMBVR	ADFR	SEM_L1_3_4nm_slices18to283_EM 184	98
SMBVR	ADFR	SEM_L1_3_4nm_slices18to283_EM 185	88
SMBVR	ADFR	SEM_L1_3_4nm_slices18to283_EM 186	95
SMBVR	ADFR	SEM_L1_3_4nm_slices18to283_EM 187	88
SMBVR	ADFR	SEM_L1_3_4nm_slices18to283_EM 188	70
SMBVR	ADFR	SEM_L1_3_4nm_slices18to283_EM 189	62
SMBVR	ADFR	SEM_L1_3_4nm_slices18to283_EM 190	64
SMBVR	ADFR	SEM_L1_3_4nm_slices18to283_EM 191	60
SMBVR	ADFR	SEM_L1_3_4nm_slices18to283_EM 192	49
SMBVR	ADFR	SEM_L1_3_4nm_slices18to283_EM 193	45
SMBVR	ADFR	SEM_L1_3_4nm_slices18to283_EM 194	64
SMBVR	ADFR	SEM_L1_3_4nm_slices18to283_EM 195	64
SMBVR	ADFR	SEM_L1_3_4nm_slices18to283_EM 196	60
SMBVR	ADFR	SEM_L1_3_4nm_slices18to283_EM 197	61
SMBVR	ADFR	SEM_L1_3_4nm_slices18to283_EM 198	40
SMBVR	ADFR	SEM_L1_3_4nm_slices18to283_EM 199	42
SMBVR	ADFR	SEM_L1_3_4nm_slices18to283_EM 200	17
SMBVR	ADFR	SEM_L1_3_4nm_slices18to283_EM 201	16
URXR	ADFR	SEM_L1_3_4nm_slices18to283_EM 116	95
URXR	ADFR	SEM_L1_3_4nm_slices18to283_EM 116	8
URXR	ADFR	SEM_L1_3_4nm_slices18to283_EM 117	342
URXR	ADFR	SEM_L1_3_4nm_slices18to283_EM 117	114
URXR	ADFR	SEM_L1_3_4nm_slices18to283_EM 118	368
URXR	ADFR	SEM_L1_3_4nm_slices18to283_EM 118	141
URXR	ADFR	SEM_L1_3_4nm_slices18to283_EM 119	742
URXR	ADFR	SEM_L1_3_4nm_slices18to283_EM 120	685
URXR	ADFR	SEM_L1_3_4nm_slices18to283_EM 120	79
URXR	ADFR	SEM_L1_3_4nm_slices18to283_EM 120	118
URXR	ADFR	SEM_L1_3_4nm_slices18to283_EM 121	451
URXR	ADFR	SEM_L1_3_4nm_slices18to283_EM 121	362
URXR	ADFR	SEM_L1_3_4nm_slices18to283_EM 122	374
URXR	ADFR	SEM_L1_3_4nm_slices18to283_EM 122	196
URXR	ADFR	SEM_L1_3_4nm_slices18to283_EM 123	325
URXR	ADFR	SEM_L1_3_4nm_slices18to283_EM 124	217
URXR	ADFR	SEM_L1_3_4nm_slices18to283_EM 127	70
URXR	ADFR	SEM_L1_3_4nm_slices18to283_EM 128	54
URXR	ADFR	SEM_L1_3_4nm_slices18to283_EM 129	91
URXR	ADFR	SEM_L1_3_4nm_slices18to283_EM 130	54
URXR	ADFR	SEM_L1_3_4nm_slices18to283_EM 131	120
URXR	ADFR	SEM_L1_3_4nm_slices18to283_EM 132	100
URXR	ADFR	SEM_L1_3_4nm_slices18to283_EM 133	107
URXR	ADFR	SEM_L1_3_4nm_slices18to283_EM 134	125
URXR	ADFR	SEM_L1_3_4nm_slices18to283_EM 135	109
URXR	ADFR	SEM_L1_3_4nm_slices18to283_EM 136	59
URXR	ADFR	SEM_L1_3_4nm_slices18to283_EM 137	56
URXR	ADFR	SEM_L1_3_4nm_slices18to283_EM 138	45
URXR	ADFR	SEM_L1_3_4nm_slices18to283_EM 139	6
URXR	ADFR	SEM_L1_3_4nm_slices18to283_EM 140	67
URXR	ADFR	SEM_L1_3_4nm_slices18to283_EM 141	62
URXR	ADFR	SEM_L1_3_4nm_slices18to283_EM 142	16
ADAL	ADLL	SEM_L1_3_4nm_slices18to283_EM 163	20
ADAL	ADLL	SEM_L1_3_4nm_slices18to283_EM 164	18
ADAL	ADLL	SEM_L1_3_4nm_slices18to283_EM 165	52
ADAL	ADLL	SEM_L1_3_4nm_slices18to283_EM 168	102
ADAL	ADLL	SEM_L1_3_4nm_slices18to283_EM 169	72
ADAL	ADLL	SEM_L1_3_4nm_slices18to283_EM 170	78
ADAL	ADLL	SEM_L1_3_4nm_slices18to283_EM 171	66
ADLR	ADLL	SEM_L1_3_4nm_slices18to283_EM 112	139
ADLR	ADLL	SEM_L1_3_4nm_slices18to283_EM 113	219
ADLR	ADLL	SEM_L1_3_4nm_slices18to283_EM 114	253
ADLR	ADLL	SEM_L1_3_4nm_slices18to283_EM 115	257
ADLR	ADLL	SEM_L1_3_4nm_slices18to283_EM 116	269
ADLR	ADLL	SEM_L1_3_4nm_slices18to283_EM 117	224
ADLR	ADLL	SEM_L1_3_4nm_slices18to283_EM 118	234
ADLR	ADLL	SEM_L1_3_4nm_slices18to283_EM 119	222
ADLR	ADLL	SEM_L1_3_4nm_slices18to283_EM 120	184
ADLR	ADLL	SEM_L1_3_4nm_slices18to283_EM 121	227
ADLR	ADLL	SEM_L1_3_4nm_slices18to283_EM 122	176
ADLR	ADLL	SEM_L1_3_4nm_slices18to283_EM 123	148
ADLR	ADLL	SEM_L1_3_4nm_slices18to283_EM 124	131
ALA	ADLL	SEM_L1_3_4nm_slices18to283_EM 122	61
ALA	ADLL	SEM_L1_3_4nm_slices18to283_EM 123	51
ALA	ADLL	SEM_L1_3_4nm_slices18to283_EM 128	14
ALA	ADLL	SEM_L1_3_4nm_slices18to283_EM 137	197
ALA	ADLL	SEM_L1_3_4nm_slices18to283_EM 138	249
ALA	ADLL	SEM_L1_3_4nm_slices18to283_EM 139	181
ALA	ADLL	SEM_L1_3_4nm_slices18to283_EM 140	292
ALA	ADLL	SEM_L1_3_4nm_slices18to283_EM 141	262
ALA	ADLL	SEM_L1_3_4nm_slices18to283_EM 142	83
ALA	ADLL	SEM_L1_3_4nm_slices18to283_EM 142	77
ALA	ADLL	SEM_L1_3_4nm_slices18to283_EM 143	81
ALA	ADLL	SEM_L1_3_4nm_slices18to283_EM 144	64
ALA	ADLL	SEM_L1_3_4nm_slices18to283_EM 145	34
ALA	ADLL	SEM_L1_3_4nm_slices18to283_EM 167	149
ALA	ADLL	SEM_L1_3_4nm_slices18to283_EM 168	176
ALA	ADLL	SEM_L1_3_4nm_slices18to283_EM 169	198
ALA	ADLL	SEM_L1_3_4nm_slices18to283_EM 170	245
ALA	ADLL	SEM_L1_3_4nm_slices18to283_EM 171	244
ALA	ADLL	SEM_L1_3_4nm_slices18to283_EM 172	269
ALA	ADLL	SEM_L1_3_4nm_slices18to283_EM 173	192
ALA	ADLL	SEM_L1_3_4nm_slices18to283_EM 174	254
ALA	ADLL	SEM_L1_3_4nm_slices18to283_EM 175	240
ALA	ADLL	SEM_L1_3_4nm_slices18to283_EM 177	200
ALA	ADLL	SEM_L1_3_4nm_slices18to283_EM 178	168
ALA	ADLL	SEM_L1_3_4nm_slices18to283_EM 179	166
ALA	ADLL	SEM_L1_3_4nm_slices18to283_EM 180	125
ALA	ADLL	SEM_L1_3_4nm_slices18to283_EM 181	111
ALA	ADLL	SEM_L1_3_4nm_slices18to283_EM 182	94
ALA	ADLL	SEM_L1_3_4nm_slices18to283_EM 183	48
ALML	ADLL	SEM_L1_3_4nm_slices18to283_EM 146	93
ALML	ADLL	SEM_L1_3_4nm_slices18to283_EM 147	120
ASEL	ADLL	SEM_L1_3_4nm_slices18to283_EM 124	52
ASEL	ADLL	SEM_L1_3_4nm_slices18to283_EM 161	12
ASEL	ADLL	SEM_L1_3_4nm_slices18to283_EM 163	184
ASEL	ADLL	SEM_L1_3_4nm_slices18to283_EM 164	183
ASEL	ADLL	SEM_L1_3_4nm_slices18to283_EM 165	289
ASEL	ADLL	SEM_L1_3_4nm_slices18to283_EM 166	245
ASEL	ADLL	SEM_L1_3_4nm_slices18to283_EM 166	30
ASIL	ADLL	SEM_L1_3_4nm_slices18to283_EM 115	127
ASIL	ADLL	SEM_L1_3_4nm_slices18to283_EM 116	109
ASIL	ADLL	SEM_L1_3_4nm_slices18to283_EM 132	165
ASIL	ADLL	SEM_L1_3_4nm_slices18to283_EM 133	245
ASIL	ADLL	SEM_L1_3_4nm_slices18to283_EM 134	266
ASIL	ADLL	SEM_L1_3_4nm_slices18to283_EM 135	263
ASIL	ADLL	SEM_L1_3_4nm_slices18to283_EM 136	250
ASIL	ADLL	SEM_L1_3_4nm_slices18to283_EM 137	198
ASIL	ADLL	SEM_L1_3_4nm_slices18to283_EM 138	174
ASIL	ADLL	SEM_L1_3_4nm_slices18to283_EM 139	118
ASIL	ADLL	SEM_L1_3_4nm_slices18to283_EM 140	81
ASIL	ADLL	SEM_L1_3_4nm_slices18to283_EM 141	113
ASIL	ADLL	SEM_L1_3_4nm_slices18to283_EM 142	67
ASIL	ADLL	SEM_L1_3_4nm_slices18to283_EM 143	49
ASIR	ADLL	SEM_L1_3_4nm_slices18to283_EM 113	51
ASIR	ADLL	SEM_L1_3_4nm_slices18to283_EM 114	82
ASIR	ADLL	SEM_L1_3_4nm_slices18to283_EM 115	150
ASIR	ADLL	SEM_L1_3_4nm_slices18to283_EM 116	106
ASJL	ADLL	SEM_L1_3_4nm_slices18to283_EM 172	95
ASJL	ADLL	SEM_L1_3_4nm_slices18to283_EM 173	153
ASJL	ADLL	SEM_L1_3_4nm_slices18to283_EM 174	266
ASJL	ADLL	SEM_L1_3_4nm_slices18to283_EM 175	350
ASJL	ADLL	SEM_L1_3_4nm_slices18to283_EM 177	237
ASJL	ADLL	SEM_L1_3_4nm_slices18to283_EM 178	187
ASJL	ADLL	SEM_L1_3_4nm_slices18to283_EM 179	160
ASJL	ADLL	SEM_L1_3_4nm_slices18to283_EM 180	156
ASJL	ADLL	SEM_L1_3_4nm_slices18to283_EM 181	153
ASJL	ADLL	SEM_L1_3_4nm_slices18to283_EM 182	87
ASJL	ADLL	SEM_L1_3_4nm_slices18to283_EM 183	57
ASJL	ADLL	SEM_L1_3_4nm_slices18to283_EM 184	36
ASJL	ADLL	SEM_L1_3_4nm_slices18to283_EM 185	6
ASKR	ADLL	SEM_L1_3_4nm_slices18to283_EM 113	1
ASKR	ADLL	SEM_L1_3_4nm_slices18to283_EM 114	59
ASKR	ADLL	SEM_L1_3_4nm_slices18to283_EM 115	72
ASKR	ADLL	SEM_L1_3_4nm_slices18to283_EM 116	98
ASKR	ADLL	SEM_L1_3_4nm_slices18to283_EM 117	90
ASKR	ADLL	SEM_L1_3_4nm_slices18to283_EM 118	117
ASKR	ADLL	SEM_L1_3_4nm_slices18to283_EM 119	139
ASKR	ADLL	SEM_L1_3_4nm_slices18to283_EM 120	106
ASKR	ADLL	SEM_L1_3_4nm_slices18to283_EM 121	141
ASKR	ADLL	SEM_L1_3_4nm_slices18to283_EM 122	136
ASKR	ADLL	SEM_L1_3_4nm_slices18to283_EM 123	164
ASKR	ADLL	SEM_L1_3_4nm_slices18to283_EM 124	116
AVEL	ADLL	SEM_L1_3_4nm_slices18to283_EM 183	46
AVEL	ADLL	SEM_L1_3_4nm_slices18to283_EM 184	68
AVEL	ADLL	SEM_L1_3_4nm_slices18to283_EM 185	70
AWBL	ADLL	SEM_L1_3_4nm_slices18to283_EM 163	78
AWCL	ADLL	SEM_L1_3_4nm_slices18to283_EM 111	72
AWCL	ADLL	SEM_L1_3_4nm_slices18to283_EM 112	198
AWCL	ADLL	SEM_L1_3_4nm_slices18to283_EM 113	215
AWCL	ADLL	SEM_L1_3_4nm_slices18to283_EM 114	282
AWCL	ADLL	SEM_L1_3_4nm_slices18to283_EM 115	138
AWCL	ADLL	SEM_L1_3_4nm_slices18to283_EM 115	16
AWCL	ADLL	SEM_L1_3_4nm_slices18to283_EM 116	132
AWCL	ADLL	SEM_L1_3_4nm_slices18to283_EM 117	216
AWCL	ADLL	SEM_L1_3_4nm_slices18to283_EM 118	606
AWCL	ADLL	SEM_L1_3_4nm_slices18to283_EM 119	305
AWCL	ADLL	SEM_L1_3_4nm_slices18to283_EM 119	202
AWCL	ADLL	SEM_L1_3_4nm_slices18to283_EM 120	187
AWCL	ADLL	SEM_L1_3_4nm_slices18to283_EM 120	182
AWCL	ADLL	SEM_L1_3_4nm_slices18to283_EM 121	241
AWCL	ADLL	SEM_L1_3_4nm_slices18to283_EM 122	93
AWCL	ADLL	SEM_L1_3_4nm_slices18to283_EM 128	20
AWCL	ADLL	SEM_L1_3_4nm_slices18to283_EM 129	178
AWCL	ADLL	SEM_L1_3_4nm_slices18to283_EM 130	214
AWCL	ADLL	SEM_L1_3_4nm_slices18to283_EM 131	42
AWCL	ADLL	SEM_L1_3_4nm_slices18to283_EM 132	66
AWCL	ADLL	SEM_L1_3_4nm_slices18to283_EM 140	122
AWCL	ADLL	SEM_L1_3_4nm_slices18to283_EM 142	163
AWCL	ADLL	SEM_L1_3_4nm_slices18to283_EM 143	159
AWCL	ADLL	SEM_L1_3_4nm_slices18to283_EM 144	152
AWCL	ADLL	SEM_L1_3_4nm_slices18to283_EM 145	135
AWCL	ADLL	SEM_L1_3_4nm_slices18to283_EM 146	85
AWCL	ADLL	SEM_L1_3_4nm_slices18to283_EM 158	33
AWCL	ADLL	SEM_L1_3_4nm_slices18to283_EM 159	69
AWCL	ADLL	SEM_L1_3_4nm_slices18to283_EM 160	97
AWCL	ADLL	SEM_L1_3_4nm_slices18to283_EM 161	117
AWCL	ADLL	SEM_L1_3_4nm_slices18to283_EM 162	164
AWCL	ADLL	SEM_L1_3_4nm_slices18to283_EM 163	203
AWCL	ADLL	SEM_L1_3_4nm_slices18to283_EM 164	114
AWCL	ADLL	SEM_L1_3_4nm_slices18to283_EM 165	311
AWCL	ADLL	SEM_L1_3_4nm_slices18to283_EM 166	342
AWCL	ADLL	SEM_L1_3_4nm_slices18to283_EM 167	407
AWCL	ADLL	SEM_L1_3_4nm_slices18to283_EM 168	397
AWCL	ADLL	SEM_L1_3_4nm_slices18to283_EM 169	407
AWCL	ADLL	SEM_L1_3_4nm_slices18to283_EM 170	376
AWCL	ADLL	SEM_L1_3_4nm_slices18to283_EM 171	370
AWCL	ADLL	SEM_L1_3_4nm_slices18to283_EM 172	336
AWCL	ADLL	SEM_L1_3_4nm_slices18to283_EM 173	344
AWCL	ADLL	SEM_L1_3_4nm_slices18to283_EM 174	327
AWCL	ADLL	SEM_L1_3_4nm_slices18to283_EM 175	237
AWCL	ADLL	SEM_L1_3_4nm_slices18to283_EM 177	82
RMGL	ADLL	SEM_L1_3_4nm_slices18to283_EM 163	96
RMGL	ADLL	SEM_L1_3_4nm_slices18to283_EM 164	142
RMGL	ADLL	SEM_L1_3_4nm_slices18to283_EM 168	98
RMGL	ADLL	SEM_L1_3_4nm_slices18to283_EM 169	79
RMGL	ADLL	SEM_L1_3_4nm_slices18to283_EM 170	105
RMGL	ADLL	SEM_L1_3_4nm_slices18to283_EM 171	42
URBL	ADLL	SEM_L1_3_4nm_slices18to283_EM 155	30
URBL	ADLL	SEM_L1_3_4nm_slices18to283_EM 156	43
URBL	ADLL	SEM_L1_3_4nm_slices18to283_EM 157	41
URYDL	ADLL	SEM_L1_3_4nm_slices18to283_EM 122	16
URYDL	ADLL	SEM_L1_3_4nm_slices18to283_EM 123	85
URYDL	ADLL	SEM_L1_3_4nm_slices18to283_EM 124	48
ADAR	ADLR	SEM_L1_3_4nm_slices18to283_EM 136	139
ADAR	ADLR	SEM_L1_3_4nm_slices18to283_EM 137	177
ADAR	ADLR	SEM_L1_3_4nm_slices18to283_EM 137	148
ADAR	ADLR	SEM_L1_3_4nm_slices18to283_EM 138	415
ADAR	ADLR	SEM_L1_3_4nm_slices18to283_EM 139	198
ADAR	ADLR	SEM_L1_3_4nm_slices18to283_EM 140	153
ADAR	ADLR	SEM_L1_3_4nm_slices18to283_EM 140	27
ADAR	ADLR	SEM_L1_3_4nm_slices18to283_EM 141	126
ADAR	ADLR	SEM_L1_3_4nm_slices18to283_EM 142	14
ADAR	ADLR	SEM_L1_3_4nm_slices18to283_EM 142	75
ADAR	ADLR	SEM_L1_3_4nm_slices18to283_EM 143	52
ADAR	ADLR	SEM_L1_3_4nm_slices18to283_EM 144	55
ADAR	ADLR	SEM_L1_3_4nm_slices18to283_EM 145	82
ADAR	ADLR	SEM_L1_3_4nm_slices18to283_EM 145	79
ALA	ADLR	SEM_L1_3_4nm_slices18to283_EM 110	35
ALA	ADLR	SEM_L1_3_4nm_slices18to283_EM 110	111
ALA	ADLR	SEM_L1_3_4nm_slices18to283_EM 111	71
ALA	ADLR	SEM_L1_3_4nm_slices18to283_EM 111	207
ALA	ADLR	SEM_L1_3_4nm_slices18to283_EM 112	258
ALA	ADLR	SEM_L1_3_4nm_slices18to283_EM 113	276
ALA	ADLR	SEM_L1_3_4nm_slices18to283_EM 114	287
ALA	ADLR	SEM_L1_3_4nm_slices18to283_EM 115	308
ALA	ADLR	SEM_L1_3_4nm_slices18to283_EM 118	166
ALA	ADLR	SEM_L1_3_4nm_slices18to283_EM 119	12
ALA	ADLR	SEM_L1_3_4nm_slices18to283_EM 119	115
ALA	ADLR	SEM_L1_3_4nm_slices18to283_EM 120	26
ALA	ADLR	SEM_L1_3_4nm_slices18to283_EM 120	122
ALA	ADLR	SEM_L1_3_4nm_slices18to283_EM 121	82
ALA	ADLR	SEM_L1_3_4nm_slices18to283_EM 122	101
ALA	ADLR	SEM_L1_3_4nm_slices18to283_EM 123	123
ALA	ADLR	SEM_L1_3_4nm_slices18to283_EM 124	106
ALA	ADLR	SEM_L1_3_4nm_slices18to283_EM 125	97
ALA	ADLR	SEM_L1_3_4nm_slices18to283_EM 126	71
ALA	ADLR	SEM_L1_3_4nm_slices18to283_EM 138	58
ALA	ADLR	SEM_L1_3_4nm_slices18to283_EM 139	70
ALA	ADLR	SEM_L1_3_4nm_slices18to283_EM 140	106
ALA	ADLR	SEM_L1_3_4nm_slices18to283_EM 141	147
ALA	ADLR	SEM_L1_3_4nm_slices18to283_EM 142	179
ALA	ADLR	SEM_L1_3_4nm_slices18to283_EM 143	218
ALA	ADLR	SEM_L1_3_4nm_slices18to283_EM 144	261
ALA	ADLR	SEM_L1_3_4nm_slices18to283_EM 145	275
ALA	ADLR	SEM_L1_3_4nm_slices18to283_EM 146	298
ALA	ADLR	SEM_L1_3_4nm_slices18to283_EM 147	296
ALA	ADLR	SEM_L1_3_4nm_slices18to283_EM 148	339
ALA	ADLR	SEM_L1_3_4nm_slices18to283_EM 149	283
ALA	ADLR	SEM_L1_3_4nm_slices18to283_EM 150	284
ALA	ADLR	SEM_L1_3_4nm_slices18to283_EM 151	275
ALA	ADLR	SEM_L1_3_4nm_slices18to283_EM 152	239
ALA	ADLR	SEM_L1_3_4nm_slices18to283_EM 153	205
ALA	ADLR	SEM_L1_3_4nm_slices18to283_EM 154	199
ALA	ADLR	SEM_L1_3_4nm_slices18to283_EM 155	151
ALA	ADLR	SEM_L1_3_4nm_slices18to283_EM 156	120
ALA	ADLR	SEM_L1_3_4nm_slices18to283_EM 157	103
ALA	ADLR	SEM_L1_3_4nm_slices18to283_EM 158	37
AWAR	ADLR	SEM_L1_3_4nm_slices18to283_EM 128	35
AWAR	ADLR	SEM_L1_3_4nm_slices18to283_EM 129	97
AWAR	ADLR	SEM_L1_3_4nm_slices18to283_EM 130	101
AWAR	ADLR	SEM_L1_3_4nm_slices18to283_EM 131	248
AWAR	ADLR	SEM_L1_3_4nm_slices18to283_EM 132	243
AWAR	ADLR	SEM_L1_3_4nm_slices18to283_EM 133	396
AWAR	ADLR	SEM_L1_3_4nm_slices18to283_EM 134	435
AWAR	ADLR	SEM_L1_3_4nm_slices18to283_EM 134	49
AWAR	ADLR	SEM_L1_3_4nm_slices18to283_EM 134	165
AWAR	ADLR	SEM_L1_3_4nm_slices18to283_EM 135	856
AWAR	ADLR	SEM_L1_3_4nm_slices18to283_EM 136	1031
AWAR	ADLR	SEM_L1_3_4nm_slices18to283_EM 136	60
AWAR	ADLR	SEM_L1_3_4nm_slices18to283_EM 137	546
AWAR	ADLR	SEM_L1_3_4nm_slices18to283_EM 137	251
AWAR	ADLR	SEM_L1_3_4nm_slices18to283_EM 137	128
AWAR	ADLR	SEM_L1_3_4nm_slices18to283_EM 137	233
AWAR	ADLR	SEM_L1_3_4nm_slices18to283_EM 138	444
AWAR	ADLR	SEM_L1_3_4nm_slices18to283_EM 138	143
AWAR	ADLR	SEM_L1_3_4nm_slices18to283_EM 139	202
AWAR	ADLR	SEM_L1_3_4nm_slices18to283_EM 139	131
AWAR	ADLR	SEM_L1_3_4nm_slices18to283_EM 140	88
AWAR	ADLR	SEM_L1_3_4nm_slices18to283_EM 141	106
AWAR	ADLR	SEM_L1_3_4nm_slices18to283_EM 142	96
AWAR	ADLR	SEM_L1_3_4nm_slices18to283_EM 143	107
AWAR	ADLR	SEM_L1_3_4nm_slices18to283_EM 144	109
AWAR	ADLR	SEM_L1_3_4nm_slices18to283_EM 145	90
AWAR	ADLR	SEM_L1_3_4nm_slices18to283_EM 146	51
AWAR	ADLR	SEM_L1_3_4nm_slices18to283_EM 154	25
SMBVR	ADLR	SEM_L1_3_4nm_slices18to283_EM 138	7
SMBVR	ADLR	SEM_L1_3_4nm_slices18to283_EM 139	217
SMBVR	ADLR	SEM_L1_3_4nm_slices18to283_EM 140	161
SMBVR	ADLR	SEM_L1_3_4nm_slices18to283_EM 140	349
SMBVR	ADLR	SEM_L1_3_4nm_slices18to283_EM 140	171
SMBVR	ADLR	SEM_L1_3_4nm_slices18to283_EM 141	338
SMBVR	ADLR	SEM_L1_3_4nm_slices18to283_EM 141	603
SMBVR	ADLR	SEM_L1_3_4nm_slices18to283_EM 141	298
SMBVR	ADLR	SEM_L1_3_4nm_slices18to283_EM 142	687
SMBVR	ADLR	SEM_L1_3_4nm_slices18to283_EM 142	725
SMBVR	ADLR	SEM_L1_3_4nm_slices18to283_EM 143	414
SMBVR	ADLR	SEM_L1_3_4nm_slices18to283_EM 143	177
SMBVR	ADLR	SEM_L1_3_4nm_slices18to283_EM 143	554
SMBVR	ADLR	SEM_L1_3_4nm_slices18to283_EM 144	389
SMBVR	ADLR	SEM_L1_3_4nm_slices18to283_EM 144	232
SMBVR	ADLR	SEM_L1_3_4nm_slices18to283_EM 144	148
SMBVR	ADLR	SEM_L1_3_4nm_slices18to283_EM 145	349
SMBVR	ADLR	SEM_L1_3_4nm_slices18to283_EM 145	165
SMBVR	ADLR	SEM_L1_3_4nm_slices18to283_EM 145	154
SMBVR	ADLR	SEM_L1_3_4nm_slices18to283_EM 146	323
SMBVR	ADLR	SEM_L1_3_4nm_slices18to283_EM 146	118
SMBVR	ADLR	SEM_L1_3_4nm_slices18to283_EM 146	200
SMBVR	ADLR	SEM_L1_3_4nm_slices18to283_EM 147	318
SMBVR	ADLR	SEM_L1_3_4nm_slices18to283_EM 147	24
SMBVR	ADLR	SEM_L1_3_4nm_slices18to283_EM 147	234
SMBVR	ADLR	SEM_L1_3_4nm_slices18to283_EM 148	166
SMBVR	ADLR	SEM_L1_3_4nm_slices18to283_EM 148	103
SMBVR	ADLR	SEM_L1_3_4nm_slices18to283_EM 152	168
SMBVR	ADLR	SEM_L1_3_4nm_slices18to283_EM 153	168
SMBVR	ADLR	SEM_L1_3_4nm_slices18to283_EM 154	146
SMBVR	ADLR	SEM_L1_3_4nm_slices18to283_EM 155	185
SMBVR	ADLR	SEM_L1_3_4nm_slices18to283_EM 158	19
ASEL	AFDL	SEM_L1_3_4nm_slices18to283_EM 90	39
ASEL	AFDL	SEM_L1_3_4nm_slices18to283_EM 94	89
AWBL	AFDL	SEM_L1_3_4nm_slices18to283_EM 90	34
AWBL	AFDL	SEM_L1_3_4nm_slices18to283_EM 92	62
AWBL	AFDL	SEM_L1_3_4nm_slices18to283_EM 93	54
AWBL	AFDL	SEM_L1_3_4nm_slices18to283_EM 94	30
AWBL	AFDL	SEM_L1_3_4nm_slices18to283_EM 95	16
AWCL	AFDL	SEM_L1_3_4nm_slices18to283_EM 162	32
AWCL	AFDL	SEM_L1_3_4nm_slices18to283_EM 163	49
AWCL	AFDL	SEM_L1_3_4nm_slices18to283_EM 164	71
AWCL	AFDL	SEM_L1_3_4nm_slices18to283_EM 166	46
AWCL	AFDL	SEM_L1_3_4nm_slices18to283_EM 167	58
AWCL	AFDL	SEM_L1_3_4nm_slices18to283_EM 172	42
AWCL	AFDL	SEM_L1_3_4nm_slices18to283_EM 175	57
AWCL	AFDL	SEM_L1_3_4nm_slices18to283_EM 176	24
AWCL	AFDL	SEM_L1_3_4nm_slices18to283_EM 177	13
AWCL	AFDL	SEM_L1_3_4nm_slices18to283_EM 183	27
AWCL	AFDL	SEM_L1_3_4nm_slices18to283_EM 184	4
AWCL	AFDL	SEM_L1_3_4nm_slices18to283_EM 185	45
AWCL	AFDL	SEM_L1_3_4nm_slices18to283_EM 192	41
AWCL	AFDL	SEM_L1_3_4nm_slices18to283_EM 193	73
AWCL	AFDL	SEM_L1_3_4nm_slices18to283_EM 196	83
AWCL	AFDL	SEM_L1_3_4nm_slices18to283_EM 197	53
AWCL	AFDL	SEM_L1_3_4nm_slices18to283_EM 198	52
AWCL	AFDL	SEM_L1_3_4nm_slices18to283_EM 199	31
AWCL	AFDL	SEM_L1_3_4nm_slices18to283_EM 200	36
AWCL	AFDL	SEM_L1_3_4nm_slices18to283_EM 201	25
AWCL	AFDL	SEM_L1_3_4nm_slices18to283_EM 202	4
AWCL	AFDL	SEM_L1_3_4nm_slices18to283_EM 203	18
AWCL	AFDL	SEM_L1_3_4nm_slices18to283_EM 204	23
AWCL	AFDL	SEM_L1_3_4nm_slices18to283_EM 205	45
AWCL	AFDL	SEM_L1_3_4nm_slices18to283_EM 206	46
AWCL	AFDL	SEM_L1_3_4nm_slices18to283_EM 207	68
AWCL	AFDL	SEM_L1_3_4nm_slices18to283_EM 208	79
AWCL	AFDL	SEM_L1_3_4nm_slices18to283_EM 209	94
AWCL	AFDL	SEM_L1_3_4nm_slices18to283_EM 210	125
AWCL	AFDL	SEM_L1_3_4nm_slices18to283_EM 211	132
AWCL	AFDL	SEM_L1_3_4nm_slices18to283_EM 211	47
AWCL	AFDL	SEM_L1_3_4nm_slices18to283_EM 212	50
IL2DL	AFDL	SEM_L1_3_4nm_slices18to283_EM 109	6
IL2DL	AFDL	SEM_L1_3_4nm_slices18to283_EM 111	16
SIBDL	AFDL	SEM_L1_3_4nm_slices18to283_EM 206	60
SIBDL	AFDL	SEM_L1_3_4nm_slices18to283_EM 207	78
SIBDL	AFDL	SEM_L1_3_4nm_slices18to283_EM 208	206
SIBDL	AFDL	SEM_L1_3_4nm_slices18to283_EM 209	280
SIBDL	AFDL	SEM_L1_3_4nm_slices18to283_EM 210	232
SIBDL	AFDL	SEM_L1_3_4nm_slices18to283_EM 211	106
SIBDL	AFDL	SEM_L1_3_4nm_slices18to283_EM 211	178
SIBDL	AFDL	SEM_L1_3_4nm_slices18to283_EM 212	190
SIBDL	AFDL	SEM_L1_3_4nm_slices18to283_EM 213	137
SIBDL	AFDL	SEM_L1_3_4nm_slices18to283_EM 214	121
AFDL	AFDR	SEM_L1_3_4nm_slices18to283_EM 83	43
AFDL	AFDR	SEM_L1_3_4nm_slices18to283_EM 84	30
AFDL	AFDR	SEM_L1_3_4nm_slices18to283_EM 85	145
AFDL	AFDR	SEM_L1_3_4nm_slices18to283_EM 86	120
AFDL	AFDR	SEM_L1_3_4nm_slices18to283_EM 87	79
ASEL	AFDR	SEM_L1_3_4nm_slices18to283_EM 90	106
ASEL	AFDR	SEM_L1_3_4nm_slices18to283_EM 98	166
ASEL	AFDR	SEM_L1_3_4nm_slices18to283_EM 99	143
ASEL	AFDR	SEM_L1_3_4nm_slices18to283_EM 100	178
ASEL	AFDR	SEM_L1_3_4nm_slices18to283_EM 101	230
ASEL	AFDR	SEM_L1_3_4nm_slices18to283_EM 102	212
ASEL	AFDR	SEM_L1_3_4nm_slices18to283_EM 103	192
ASEL	AFDR	SEM_L1_3_4nm_slices18to283_EM 104	130
ASEL	AFDR	SEM_L1_3_4nm_slices18to283_EM 105	110
ASEL	AFDR	SEM_L1_3_4nm_slices18to283_EM 106	156
ASEL	AFDR	SEM_L1_3_4nm_slices18to283_EM 107	131
ASEL	AFDR	SEM_L1_3_4nm_slices18to283_EM 109	112
ASEL	AFDR	SEM_L1_3_4nm_slices18to283_EM 110	42
ASEL	AFDR	SEM_L1_3_4nm_slices18to283_EM 111	55
ASEL	AFDR	SEM_L1_3_4nm_slices18to283_EM 112	64
ASEL	AFDR	SEM_L1_3_4nm_slices18to283_EM 113	86
ASEL	AFDR	SEM_L1_3_4nm_slices18to283_EM 114	81
ASEL	AFDR	SEM_L1_3_4nm_slices18to283_EM 115	89
ASEL	AFDR	SEM_L1_3_4nm_slices18to283_EM 116	14
ASEL	AFDR	SEM_L1_3_4nm_slices18to283_EM 117	268
ASEL	AFDR	SEM_L1_3_4nm_slices18to283_EM 118	185
ASEL	AFDR	SEM_L1_3_4nm_slices18to283_EM 119	115
ASEL	AFDR	SEM_L1_3_4nm_slices18to283_EM 120	178
ASEL	AFDR	SEM_L1_3_4nm_slices18to283_EM 121	95
ASIR	AFDR	SEM_L1_3_4nm_slices18to283_EM 125	351
AWBR	AFDR	SEM_L1_3_4nm_slices18to283_EM 148	246
AWBR	AFDR	SEM_L1_3_4nm_slices18to283_EM 149	251
AWBR	AFDR	SEM_L1_3_4nm_slices18to283_EM 150	249
AWBR	AFDR	SEM_L1_3_4nm_slices18to283_EM 151	210
AWBR	AFDR	SEM_L1_3_4nm_slices18to283_EM 152	215
AWBR	AFDR	SEM_L1_3_4nm_slices18to283_EM 153	239
AWBR	AFDR	SEM_L1_3_4nm_slices18to283_EM 154	243
AWBR	AFDR	SEM_L1_3_4nm_slices18to283_EM 155	281
AWBR	AFDR	SEM_L1_3_4nm_slices18to283_EM 156	270
AWBR	AFDR	SEM_L1_3_4nm_slices18to283_EM 157	267
AWBR	AFDR	SEM_L1_3_4nm_slices18to283_EM 158	253
AWBR	AFDR	SEM_L1_3_4nm_slices18to283_EM 159	212
AWBR	AFDR	SEM_L1_3_4nm_slices18to283_EM 160	213
AWBR	AFDR	SEM_L1_3_4nm_slices18to283_EM 161	177
AWBR	AFDR	SEM_L1_3_4nm_slices18to283_EM 162	156
AWBR	AFDR	SEM_L1_3_4nm_slices18to283_EM 163	148
AWBR	AFDR	SEM_L1_3_4nm_slices18to283_EM 164	133
AWBR	AFDR	SEM_L1_3_4nm_slices18to283_EM 165	135
AWBR	AFDR	SEM_L1_3_4nm_slices18to283_EM 166	115
AWBR	AFDR	SEM_L1_3_4nm_slices18to283_EM 167	107
AWBR	AFDR	SEM_L1_3_4nm_slices18to283_EM 168	100
AWBR	AFDR	SEM_L1_3_4nm_slices18to283_EM 169	106
AWBR	AFDR	SEM_L1_3_4nm_slices18to283_EM 170	91
AWBR	AFDR	SEM_L1_3_4nm_slices18to283_EM 171	87
AWBR	AFDR	SEM_L1_3_4nm_slices18to283_EM 172	72
AWBR	AFDR	SEM_L1_3_4nm_slices18to283_EM 173	56
AWBR	AFDR	SEM_L1_3_4nm_slices18to283_EM 174	10
AWBR	AFDR	SEM_L1_3_4nm_slices18to283_EM 207	6
AWBR	AFDR	SEM_L1_3_4nm_slices18to283_EM 208	59
AWBR	AFDR	SEM_L1_3_4nm_slices18to283_EM 209	61
AWBR	AFDR	SEM_L1_3_4nm_slices18to283_EM 210	62
AWCL	AFDR	SEM_L1_3_4nm_slices18to283_EM 101	34
AWCL	AFDR	SEM_L1_3_4nm_slices18to283_EM 102	2
AWCL	AFDR	SEM_L1_3_4nm_slices18to283_EM 119	39
AWCL	AFDR	SEM_L1_3_4nm_slices18to283_EM 119	86
AWCL	AFDR	SEM_L1_3_4nm_slices18to283_EM 120	54
AWCL	AFDR	SEM_L1_3_4nm_slices18to283_EM 120	225
AWCL	AFDR	SEM_L1_3_4nm_slices18to283_EM 121	51
AWCL	AFDR	SEM_L1_3_4nm_slices18to283_EM 121	294
AWCL	AFDR	SEM_L1_3_4nm_slices18to283_EM 122	388
AWCL	AFDR	SEM_L1_3_4nm_slices18to283_EM 123	449
AWCL	AFDR	SEM_L1_3_4nm_slices18to283_EM 124	473
AWCL	AFDR	SEM_L1_3_4nm_slices18to283_EM 125	151
AWCL	AFDR	SEM_L1_3_4nm_slices18to283_EM 125	595
AWCL	AFDR	SEM_L1_3_4nm_slices18to283_EM 126	559
AWCL	AFDR	SEM_L1_3_4nm_slices18to283_EM 127	465
AWCL	AFDR	SEM_L1_3_4nm_slices18to283_EM 128	503
AWCL	AFDR	SEM_L1_3_4nm_slices18to283_EM 129	177
AWCL	AFDR	SEM_L1_3_4nm_slices18to283_EM 130	92
AWCL	AFDR	SEM_L1_3_4nm_slices18to283_EM 131	89
AWCL	AFDR	SEM_L1_3_4nm_slices18to283_EM 132	75
AWCL	AFDR	SEM_L1_3_4nm_slices18to283_EM 133	73
AWCL	AFDR	SEM_L1_3_4nm_slices18to283_EM 134	72
AWCL	AFDR	SEM_L1_3_4nm_slices18to283_EM 135	38
AWCL	AFDR	SEM_L1_3_4nm_slices18to283_EM 139	85
AWCL	AFDR	SEM_L1_3_4nm_slices18to283_EM 140	60
AWCL	AFDR	SEM_L1_3_4nm_slices18to283_EM 141	60
AWCL	AFDR	SEM_L1_3_4nm_slices18to283_EM 142	79
AWCL	AFDR	SEM_L1_3_4nm_slices18to283_EM 143	5
AWCL	AFDR	SEM_L1_3_4nm_slices18to283_EM 144	64
AWCL	AFDR	SEM_L1_3_4nm_slices18to283_EM 145	95
AWCL	AFDR	SEM_L1_3_4nm_slices18to283_EM 146	94
AWCL	AFDR	SEM_L1_3_4nm_slices18to283_EM 147	109
AWCL	AFDR	SEM_L1_3_4nm_slices18to283_EM 148	80
AWCL	AFDR	SEM_L1_3_4nm_slices18to283_EM 149	38
AWCL	AFDR	SEM_L1_3_4nm_slices18to283_EM 151	150
AWCL	AFDR	SEM_L1_3_4nm_slices18to283_EM 152	90
AWCL	AFDR	SEM_L1_3_4nm_slices18to283_EM 153	44
AWCL	AFDR	SEM_L1_3_4nm_slices18to283_EM 154	89
AWCL	AFDR	SEM_L1_3_4nm_slices18to283_EM 155	144
AWCL	AFDR	SEM_L1_3_4nm_slices18to283_EM 156	158
AWCL	AFDR	SEM_L1_3_4nm_slices18to283_EM 157	284
AWCL	AFDR	SEM_L1_3_4nm_slices18to283_EM 158	276
AWCL	AFDR	SEM_L1_3_4nm_slices18to283_EM 159	231
AWCL	AFDR	SEM_L1_3_4nm_slices18to283_EM 160	204
AWCL	AFDR	SEM_L1_3_4nm_slices18to283_EM 161	169
AWCL	AFDR	SEM_L1_3_4nm_slices18to283_EM 162	141
AWCL	AFDR	SEM_L1_3_4nm_slices18to283_EM 163	152
AWCL	AFDR	SEM_L1_3_4nm_slices18to283_EM 164	135
AWCL	AFDR	SEM_L1_3_4nm_slices18to283_EM 165	131
AWCL	AFDR	SEM_L1_3_4nm_slices18to283_EM 166	137
AWCL	AFDR	SEM_L1_3_4nm_slices18to283_EM 167	143
AWCL	AFDR	SEM_L1_3_4nm_slices18to283_EM 168	158
AWCL	AFDR	SEM_L1_3_4nm_slices18to283_EM 169	150
AWCL	AFDR	SEM_L1_3_4nm_slices18to283_EM 170	155
AWCL	AFDR	SEM_L1_3_4nm_slices18to283_EM 171	147
AWCL	AFDR	SEM_L1_3_4nm_slices18to283_EM 172	156
AWCL	AFDR	SEM_L1_3_4nm_slices18to283_EM 173	145
AWCL	AFDR	SEM_L1_3_4nm_slices18to283_EM 174	146
AWCL	AFDR	SEM_L1_3_4nm_slices18to283_EM 175	128
AWCL	AFDR	SEM_L1_3_4nm_slices18to283_EM 176	132
AWCL	AFDR	SEM_L1_3_4nm_slices18to283_EM 177	107
AWCL	AFDR	SEM_L1_3_4nm_slices18to283_EM 178	107
AWCL	AFDR	SEM_L1_3_4nm_slices18to283_EM 179	107
AWCL	AFDR	SEM_L1_3_4nm_slices18to283_EM 180	67
BAGL	AFDR	SEM_L1_3_4nm_slices18to283_EM 92	220
BAGL	AFDR	SEM_L1_3_4nm_slices18to283_EM 93	159
BAGL	AFDR	SEM_L1_3_4nm_slices18to283_EM 94	170
BAGL	AFDR	SEM_L1_3_4nm_slices18to283_EM 95	137
BAGL	AFDR	SEM_L1_3_4nm_slices18to283_EM 117	6
BAGL	AFDR	SEM_L1_3_4nm_slices18to283_EM 118	55
BAGL	AFDR	SEM_L1_3_4nm_slices18to283_EM 118	85
BAGL	AFDR	SEM_L1_3_4nm_slices18to283_EM 119	91
BAGL	AFDR	SEM_L1_3_4nm_slices18to283_EM 120	33
CEPVR	AFDR	SEM_L1_3_4nm_slices18to283_EM 145	80
CEPVR	AFDR	SEM_L1_3_4nm_slices18to283_EM 146	130
CEPVR	AFDR	SEM_L1_3_4nm_slices18to283_EM 147	165
CEPVR	AFDR	SEM_L1_3_4nm_slices18to283_EM 148	158
CEPVR	AFDR	SEM_L1_3_4nm_slices18to283_EM 149	127
IL2DR	AFDR	SEM_L1_3_4nm_slices18to283_EM 92	26
IL2R	AFDR	SEM_L1_3_4nm_slices18to283_EM 109	5
IL2R	AFDR	SEM_L1_3_4nm_slices18to283_EM 110	90
IL2R	AFDR	SEM_L1_3_4nm_slices18to283_EM 111	75
IL2R	AFDR	SEM_L1_3_4nm_slices18to283_EM 112	52
IL2R	AFDR	SEM_L1_3_4nm_slices18to283_EM 113	36
OLLR	AFDR	SEM_L1_3_4nm_slices18to283_EM 109	34
OLQDR	AFDR	SEM_L1_3_4nm_slices18to283_EM 93	76
ADFL	AIAL	SEM_L1_3_4nm_slices18to283_EM 110	151
ADFL	AIAL	SEM_L1_3_4nm_slices18to283_EM 111	136
ADFL	AIAL	SEM_L1_3_4nm_slices18to283_EM 112	175
ADFL	AIAL	SEM_L1_3_4nm_slices18to283_EM 113	130
ADFL	AIAL	SEM_L1_3_4nm_slices18to283_EM 114	108
ADFL	AIAL	SEM_L1_3_4nm_slices18to283_EM 115	101
ADFL	AIAL	SEM_L1_3_4nm_slices18to283_EM 116	104
ADFL	AIAL	SEM_L1_3_4nm_slices18to283_EM 117	72
ADFL	AIAL	SEM_L1_3_4nm_slices18to283_EM 118	58
ADFL	AIAL	SEM_L1_3_4nm_slices18to283_EM 220	78
ADFL	AIAL	SEM_L1_3_4nm_slices18to283_EM 221	88
ADFL	AIAL	SEM_L1_3_4nm_slices18to283_EM 222	90
ADLL	AIAL	SEM_L1_3_4nm_slices18to283_EM 115	119
ADLL	AIAL	SEM_L1_3_4nm_slices18to283_EM 116	104
ADLL	AIAL	SEM_L1_3_4nm_slices18to283_EM 117	92
ADLL	AIAL	SEM_L1_3_4nm_slices18to283_EM 117	42
ADLL	AIAL	SEM_L1_3_4nm_slices18to283_EM 118	128
ADLL	AIAL	SEM_L1_3_4nm_slices18to283_EM 119	44
ADLL	AIAL	SEM_L1_3_4nm_slices18to283_EM 170	4
ADLL	AIAL	SEM_L1_3_4nm_slices18to283_EM 171	40
ADLL	AIAL	SEM_L1_3_4nm_slices18to283_EM 172	40
ADLL	AIAL	SEM_L1_3_4nm_slices18to283_EM 173	73
ADLL	AIAL	SEM_L1_3_4nm_slices18to283_EM 174	46
ADLL	AIAL	SEM_L1_3_4nm_slices18to283_EM 175	74
ADLL	AIAL	SEM_L1_3_4nm_slices18to283_EM 177	88
ADLL	AIAL	SEM_L1_3_4nm_slices18to283_EM 178	72
ADLL	AIAL	SEM_L1_3_4nm_slices18to283_EM 179	99
ADLL	AIAL	SEM_L1_3_4nm_slices18to283_EM 180	96
ADLL	AIAL	SEM_L1_3_4nm_slices18to283_EM 181	88
ADLL	AIAL	SEM_L1_3_4nm_slices18to283_EM 182	78
ADLL	AIAL	SEM_L1_3_4nm_slices18to283_EM 183	57
AFDL	AIAL	SEM_L1_3_4nm_slices18to283_EM 143	21
AFDL	AIAL	SEM_L1_3_4nm_slices18to283_EM 144	37
ASEL	AIAL	SEM_L1_3_4nm_slices18to283_EM 122	168
ASEL	AIAL	SEM_L1_3_4nm_slices18to283_EM 123	46
ASEL	AIAL	SEM_L1_3_4nm_slices18to283_EM 124	56
ASEL	AIAL	SEM_L1_3_4nm_slices18to283_EM 125	40
ASEL	AIAL	SEM_L1_3_4nm_slices18to283_EM 126	43
ASEL	AIAL	SEM_L1_3_4nm_slices18to283_EM 127	71
ASEL	AIAL	SEM_L1_3_4nm_slices18to283_EM 128	68
ASEL	AIAL	SEM_L1_3_4nm_slices18to283_EM 129	62
ASEL	AIAL	SEM_L1_3_4nm_slices18to283_EM 130	87
ASEL	AIAL	SEM_L1_3_4nm_slices18to283_EM 131	41
ASEL	AIAL	SEM_L1_3_4nm_slices18to283_EM 132	58
ASEL	AIAL	SEM_L1_3_4nm_slices18to283_EM 133	56
ASEL	AIAL	SEM_L1_3_4nm_slices18to283_EM 134	56
ASEL	AIAL	SEM_L1_3_4nm_slices18to283_EM 136	55
ASEL	AIAL	SEM_L1_3_4nm_slices18to283_EM 137	48
ASEL	AIAL	SEM_L1_3_4nm_slices18to283_EM 144	160
ASEL	AIAL	SEM_L1_3_4nm_slices18to283_EM 145	93
ASEL	AIAL	SEM_L1_3_4nm_slices18to283_EM 146	109
ASEL	AIAL	SEM_L1_3_4nm_slices18to283_EM 149	120
ASEL	AIAL	SEM_L1_3_4nm_slices18to283_EM 152	103
ASEL	AIAL	SEM_L1_3_4nm_slices18to283_EM 153	135
ASEL	AIAL	SEM_L1_3_4nm_slices18to283_EM 154	130
ASEL	AIAL	SEM_L1_3_4nm_slices18to283_EM 155	59
ASEL	AIAL	SEM_L1_3_4nm_slices18to283_EM 156	48
ASEL	AIAL	SEM_L1_3_4nm_slices18to283_EM 157	49
ASEL	AIAL	SEM_L1_3_4nm_slices18to283_EM 158	53
ASEL	AIAL	SEM_L1_3_4nm_slices18to283_EM 160	165
ASEL	AIAL	SEM_L1_3_4nm_slices18to283_EM 161	124
ASEL	AIAL	SEM_L1_3_4nm_slices18to283_EM 162	138
ASEL	AIAL	SEM_L1_3_4nm_slices18to283_EM 163	144
ASEL	AIAL	SEM_L1_3_4nm_slices18to283_EM 164	118
ASEL	AIAL	SEM_L1_3_4nm_slices18to283_EM 165	2
ASER	AIAL	SEM_L1_3_4nm_slices18to283_EM 112	64
ASER	AIAL	SEM_L1_3_4nm_slices18to283_EM 113	68
ASER	AIAL	SEM_L1_3_4nm_slices18to283_EM 114	90
ASER	AIAL	SEM_L1_3_4nm_slices18to283_EM 115	102
ASER	AIAL	SEM_L1_3_4nm_slices18to283_EM 116	116
ASER	AIAL	SEM_L1_3_4nm_slices18to283_EM 117	176
ASER	AIAL	SEM_L1_3_4nm_slices18to283_EM 118	159
ASER	AIAL	SEM_L1_3_4nm_slices18to283_EM 119	183
ASER	AIAL	SEM_L1_3_4nm_slices18to283_EM 120	169
ASER	AIAL	SEM_L1_3_4nm_slices18to283_EM 121	144
ASER	AIAL	SEM_L1_3_4nm_slices18to283_EM 122	109
ASER	AIAL	SEM_L1_3_4nm_slices18to283_EM 123	107
ASER	AIAL	SEM_L1_3_4nm_slices18to283_EM 124	120
ASER	AIAL	SEM_L1_3_4nm_slices18to283_EM 125	36
ASER	AIAL	SEM_L1_3_4nm_slices18to283_EM 126	36
ASER	AIAL	SEM_L1_3_4nm_slices18to283_EM 139	133
ASER	AIAL	SEM_L1_3_4nm_slices18to283_EM 140	124
ASER	AIAL	SEM_L1_3_4nm_slices18to283_EM 141	124
ASER	AIAL	SEM_L1_3_4nm_slices18to283_EM 142	127
ASER	AIAL	SEM_L1_3_4nm_slices18to283_EM 143	127
ASER	AIAL	SEM_L1_3_4nm_slices18to283_EM 144	147
ASER	AIAL	SEM_L1_3_4nm_slices18to283_EM 145	204
ASER	AIAL	SEM_L1_3_4nm_slices18to283_EM 146	272
ASER	AIAL	SEM_L1_3_4nm_slices18to283_EM 149	94
ASER	AIAL	SEM_L1_3_4nm_slices18to283_EM 150	41
ASER	AIAL	SEM_L1_3_4nm_slices18to283_EM 151	48
ASER	AIAL	SEM_L1_3_4nm_slices18to283_EM 152	84
ASER	AIAL	SEM_L1_3_4nm_slices18to283_EM 153	43
ASER	AIAL	SEM_L1_3_4nm_slices18to283_EM 154	70
ASER	AIAL	SEM_L1_3_4nm_slices18to283_EM 155	123
ASER	AIAL	SEM_L1_3_4nm_slices18to283_EM 156	122
ASER	AIAL	SEM_L1_3_4nm_slices18to283_EM 157	117
ASER	AIAL	SEM_L1_3_4nm_slices18to283_EM 158	119
ASER	AIAL	SEM_L1_3_4nm_slices18to283_EM 171	233
ASER	AIAL	SEM_L1_3_4nm_slices18to283_EM 172	321
ASER	AIAL	SEM_L1_3_4nm_slices18to283_EM 173	479
ASER	AIAL	SEM_L1_3_4nm_slices18to283_EM 174	440
ASER	AIAL	SEM_L1_3_4nm_slices18to283_EM 175	294
ASER	AIAL	SEM_L1_3_4nm_slices18to283_EM 176	189
ASGL	AIAL	SEM_L1_3_4nm_slices18to283_EM 173	216
ASGL	AIAL	SEM_L1_3_4nm_slices18to283_EM 174	329
ASGL	AIAL	SEM_L1_3_4nm_slices18to283_EM 175	399
ASGL	AIAL	SEM_L1_3_4nm_slices18to283_EM 176	190
ASGL	AIAL	SEM_L1_3_4nm_slices18to283_EM 178	83
ASGL	AIAL	SEM_L1_3_4nm_slices18to283_EM 183	8
ASGL	AIAL	SEM_L1_3_4nm_slices18to283_EM 183	93
ASGL	AIAL	SEM_L1_3_4nm_slices18to283_EM 184	68
ASGL	AIAL	SEM_L1_3_4nm_slices18to283_EM 184	181
ASGL	AIAL	SEM_L1_3_4nm_slices18to283_EM 184	139
ASGL	AIAL	SEM_L1_3_4nm_slices18to283_EM 185	53
ASGL	AIAL	SEM_L1_3_4nm_slices18to283_EM 185	347
ASGL	AIAL	SEM_L1_3_4nm_slices18to283_EM 186	336
ASGL	AIAL	SEM_L1_3_4nm_slices18to283_EM 187	352
ASGL	AIAL	SEM_L1_3_4nm_slices18to283_EM 188	325
ASGL	AIAL	SEM_L1_3_4nm_slices18to283_EM 189	301
ASGL	AIAL	SEM_L1_3_4nm_slices18to283_EM 190	281
ASGL	AIAL	SEM_L1_3_4nm_slices18to283_EM 191	274
ASGL	AIAL	SEM_L1_3_4nm_slices18to283_EM 192	268
ASGL	AIAL	SEM_L1_3_4nm_slices18to283_EM 193	251
ASGL	AIAL	SEM_L1_3_4nm_slices18to283_EM 194	263
ASGL	AIAL	SEM_L1_3_4nm_slices18to283_EM 195	248
ASGL	AIAL	SEM_L1_3_4nm_slices18to283_EM 196	194
ASGL	AIAL	SEM_L1_3_4nm_slices18to283_EM 197	199
ASGL	AIAL	SEM_L1_3_4nm_slices18to283_EM 198	151
ASGL	AIAL	SEM_L1_3_4nm_slices18to283_EM 199	140
ASGL	AIAL	SEM_L1_3_4nm_slices18to283_EM 200	114
ASGL	AIAL	SEM_L1_3_4nm_slices18to283_EM 201	101
ASGL	AIAL	SEM_L1_3_4nm_slices18to283_EM 202	104
ASGL	AIAL	SEM_L1_3_4nm_slices18to283_EM 203	109
ASGL	AIAL	SEM_L1_3_4nm_slices18to283_EM 204	142
ASGL	AIAL	SEM_L1_3_4nm_slices18to283_EM 205	136
ASGL	AIAL	SEM_L1_3_4nm_slices18to283_EM 206	128
ASGL	AIAL	SEM_L1_3_4nm_slices18to283_EM 207	127
ASGL	AIAL	SEM_L1_3_4nm_slices18to283_EM 208	106
ASGL	AIAL	SEM_L1_3_4nm_slices18to283_EM 209	95
ASGL	AIAL	SEM_L1_3_4nm_slices18to283_EM 210	95
ASGL	AIAL	SEM_L1_3_4nm_slices18to283_EM 211	82
ASGL	AIAL	SEM_L1_3_4nm_slices18to283_EM 212	84
ASGL	AIAL	SEM_L1_3_4nm_slices18to283_EM 213	88
ASGL	AIAL	SEM_L1_3_4nm_slices18to283_EM 214	104
ASGL	AIAL	SEM_L1_3_4nm_slices18to283_EM 215	90
ASGL	AIAL	SEM_L1_3_4nm_slices18to283_EM 216	80
ASGL	AIAL	SEM_L1_3_4nm_slices18to283_EM 217	85
ASGL	AIAL	SEM_L1_3_4nm_slices18to283_EM 218	85
ASGL	AIAL	SEM_L1_3_4nm_slices18to283_EM 219	145
ASGL	AIAL	SEM_L1_3_4nm_slices18to283_EM 220	149
ASGL	AIAL	SEM_L1_3_4nm_slices18to283_EM 221	166
ASGL	AIAL	SEM_L1_3_4nm_slices18to283_EM 222	176
ASIL	AIAL	SEM_L1_3_4nm_slices18to283_EM 111	84
ASIL	AIAL	SEM_L1_3_4nm_slices18to283_EM 112	140
ASIL	AIAL	SEM_L1_3_4nm_slices18to283_EM 112	113
ASIL	AIAL	SEM_L1_3_4nm_slices18to283_EM 113	76
ASIL	AIAL	SEM_L1_3_4nm_slices18to283_EM 113	164
ASIL	AIAL	SEM_L1_3_4nm_slices18to283_EM 114	2
ASIL	AIAL	SEM_L1_3_4nm_slices18to283_EM 114	252
ASIL	AIAL	SEM_L1_3_4nm_slices18to283_EM 115	227
ASIL	AIAL	SEM_L1_3_4nm_slices18to283_EM 116	319
ASIL	AIAL	SEM_L1_3_4nm_slices18to283_EM 117	176
ASIL	AIAL	SEM_L1_3_4nm_slices18to283_EM 118	158
ASIL	AIAL	SEM_L1_3_4nm_slices18to283_EM 119	124
ASIL	AIAL	SEM_L1_3_4nm_slices18to283_EM 120	64
ASIL	AIAL	SEM_L1_3_4nm_slices18to283_EM 152	231
ASIL	AIAL	SEM_L1_3_4nm_slices18to283_EM 153	275
ASIL	AIAL	SEM_L1_3_4nm_slices18to283_EM 154	318
ASIL	AIAL	SEM_L1_3_4nm_slices18to283_EM 155	340
ASIL	AIAL	SEM_L1_3_4nm_slices18to283_EM 156	309
ASIL	AIAL	SEM_L1_3_4nm_slices18to283_EM 157	228
ASIL	AIAL	SEM_L1_3_4nm_slices18to283_EM 171	127
ASIL	AIAL	SEM_L1_3_4nm_slices18to283_EM 172	199
ASIL	AIAL	SEM_L1_3_4nm_slices18to283_EM 173	204
ASIL	AIAL	SEM_L1_3_4nm_slices18to283_EM 174	217
ASIL	AIAL	SEM_L1_3_4nm_slices18to283_EM 175	207
ASIL	AIAL	SEM_L1_3_4nm_slices18to283_EM 177	147
ASIL	AIAL	SEM_L1_3_4nm_slices18to283_EM 178	74
ASIR	AIAL	SEM_L1_3_4nm_slices18to283_EM 110	1
ASIR	AIAL	SEM_L1_3_4nm_slices18to283_EM 111	76
ASIR	AIAL	SEM_L1_3_4nm_slices18to283_EM 112	54
ASJL	AIAL	SEM_L1_3_4nm_slices18to283_EM 115	86
ASJL	AIAL	SEM_L1_3_4nm_slices18to283_EM 116	113
ASJL	AIAL	SEM_L1_3_4nm_slices18to283_EM 117	139
ASJL	AIAL	SEM_L1_3_4nm_slices18to283_EM 118	82
ASJL	AIAL	SEM_L1_3_4nm_slices18to283_EM 119	84
ASJL	AIAL	SEM_L1_3_4nm_slices18to283_EM 179	135
ASJL	AIAL	SEM_L1_3_4nm_slices18to283_EM 180	127
ASJL	AIAL	SEM_L1_3_4nm_slices18to283_EM 181	1
ASJL	AIAL	SEM_L1_3_4nm_slices18to283_EM 183	35
ASJL	AIAL	SEM_L1_3_4nm_slices18to283_EM 186	10
ASJL	AIAL	SEM_L1_3_4nm_slices18to283_EM 189	39
ASJL	AIAL	SEM_L1_3_4nm_slices18to283_EM 190	48
ASJL	AIAL	SEM_L1_3_4nm_slices18to283_EM 191	60
ASJL	AIAL	SEM_L1_3_4nm_slices18to283_EM 192	69
ASJL	AIAL	SEM_L1_3_4nm_slices18to283_EM 193	92
ASJL	AIAL	SEM_L1_3_4nm_slices18to283_EM 194	106
ASJL	AIAL	SEM_L1_3_4nm_slices18to283_EM 195	182
ASJL	AIAL	SEM_L1_3_4nm_slices18to283_EM 196	229
ASJL	AIAL	SEM_L1_3_4nm_slices18to283_EM 197	266
ASJL	AIAL	SEM_L1_3_4nm_slices18to283_EM 198	258
ASJL	AIAL	SEM_L1_3_4nm_slices18to283_EM 199	283
ASJL	AIAL	SEM_L1_3_4nm_slices18to283_EM 200	304
ASJL	AIAL	SEM_L1_3_4nm_slices18to283_EM 201	310
ASJL	AIAL	SEM_L1_3_4nm_slices18to283_EM 202	334
ASJL	AIAL	SEM_L1_3_4nm_slices18to283_EM 203	332
ASJL	AIAL	SEM_L1_3_4nm_slices18to283_EM 204	138
ASJL	AIAL	SEM_L1_3_4nm_slices18to283_EM 205	96
ASJL	AIAL	SEM_L1_3_4nm_slices18to283_EM 206	52
ASJL	AIAL	SEM_L1_3_4nm_slices18to283_EM 207	41
ASJL	AIAL	SEM_L1_3_4nm_slices18to283_EM 208	33
ASJL	AIAL	SEM_L1_3_4nm_slices18to283_EM 212	82
ASJL	AIAL	SEM_L1_3_4nm_slices18to283_EM 212	40
ASJL	AIAL	SEM_L1_3_4nm_slices18to283_EM 213	171
ASJL	AIAL	SEM_L1_3_4nm_slices18to283_EM 214	139
ASJL	AIAL	SEM_L1_3_4nm_slices18to283_EM 215	136
ASJL	AIAL	SEM_L1_3_4nm_slices18to283_EM 216	59
ASJL	AIAL	SEM_L1_3_4nm_slices18to283_EM 217	81
AWBL	AIAL	SEM_L1_3_4nm_slices18to283_EM 113	93
AWBL	AIAL	SEM_L1_3_4nm_slices18to283_EM 114	177
AWBL	AIAL	SEM_L1_3_4nm_slices18to283_EM 115	210
AWBL	AIAL	SEM_L1_3_4nm_slices18to283_EM 116	201
AWBL	AIAL	SEM_L1_3_4nm_slices18to283_EM 117	188
AWBL	AIAL	SEM_L1_3_4nm_slices18to283_EM 118	191
AWBL	AIAL	SEM_L1_3_4nm_slices18to283_EM 119	192
AWBL	AIAL	SEM_L1_3_4nm_slices18to283_EM 120	177
AWBL	AIAL	SEM_L1_3_4nm_slices18to283_EM 121	231
AWBL	AIAL	SEM_L1_3_4nm_slices18to283_EM 122	160
AWBL	AIAL	SEM_L1_3_4nm_slices18to283_EM 123	115
AWBL	AIAL	SEM_L1_3_4nm_slices18to283_EM 124	131
AWBL	AIAL	SEM_L1_3_4nm_slices18to283_EM 125	79
AWBL	AIAL	SEM_L1_3_4nm_slices18to283_EM 126	135
AWBL	AIAL	SEM_L1_3_4nm_slices18to283_EM 127	114
AWBL	AIAL	SEM_L1_3_4nm_slices18to283_EM 128	104
AWBL	AIAL	SEM_L1_3_4nm_slices18to283_EM 129	101
AWBL	AIAL	SEM_L1_3_4nm_slices18to283_EM 130	80
AWBL	AIAL	SEM_L1_3_4nm_slices18to283_EM 132	51
AWBL	AIAL	SEM_L1_3_4nm_slices18to283_EM 136	27
AWBL	AIAL	SEM_L1_3_4nm_slices18to283_EM 137	53
AWBL	AIAL	SEM_L1_3_4nm_slices18to283_EM 138	96
AWBL	AIAL	SEM_L1_3_4nm_slices18to283_EM 139	99
AWBL	AIAL	SEM_L1_3_4nm_slices18to283_EM 140	13
AWBL	AIAL	SEM_L1_3_4nm_slices18to283_EM 141	14
AWBL	AIAL	SEM_L1_3_4nm_slices18to283_EM 145	24
AWBL	AIAL	SEM_L1_3_4nm_slices18to283_EM 146	74
AWBL	AIAL	SEM_L1_3_4nm_slices18to283_EM 156	125
AWBL	AIAL	SEM_L1_3_4nm_slices18to283_EM 158	153
AWBL	AIAL	SEM_L1_3_4nm_slices18to283_EM 159	124
AWBL	AIAL	SEM_L1_3_4nm_slices18to283_EM 160	73
AWCL	AIAL	SEM_L1_3_4nm_slices18to283_EM 109	84
AWCL	AIAL	SEM_L1_3_4nm_slices18to283_EM 109	35
AWCL	AIAL	SEM_L1_3_4nm_slices18to283_EM 110	319
AWCL	AIAL	SEM_L1_3_4nm_slices18to283_EM 111	332
AWCL	AIAL	SEM_L1_3_4nm_slices18to283_EM 112	44
AWCL	AIAL	SEM_L1_3_4nm_slices18to283_EM 112	309
AWCL	AIAL	SEM_L1_3_4nm_slices18to283_EM 113	201
AWCL	AIAL	SEM_L1_3_4nm_slices18to283_EM 113	411
AWCL	AIAL	SEM_L1_3_4nm_slices18to283_EM 114	247
AWCL	AIAL	SEM_L1_3_4nm_slices18to283_EM 114	535
AWCL	AIAL	SEM_L1_3_4nm_slices18to283_EM 115	298
AWCL	AIAL	SEM_L1_3_4nm_slices18to283_EM 116	204
AWCL	AIAL	SEM_L1_3_4nm_slices18to283_EM 117	302
AWCL	AIAL	SEM_L1_3_4nm_slices18to283_EM 121	47
AWCL	AIAL	SEM_L1_3_4nm_slices18to283_EM 122	112
AWCL	AIAL	SEM_L1_3_4nm_slices18to283_EM 132	39
AWCL	AIAL	SEM_L1_3_4nm_slices18to283_EM 140	54
AWCL	AIAL	SEM_L1_3_4nm_slices18to283_EM 142	61
AWCL	AIAL	SEM_L1_3_4nm_slices18to283_EM 143	56
AWCL	AIAL	SEM_L1_3_4nm_slices18to283_EM 144	18
AWCL	AIAL	SEM_L1_3_4nm_slices18to283_EM 158	115
AWCL	AIAL	SEM_L1_3_4nm_slices18to283_EM 159	131
AWCL	AIAL	SEM_L1_3_4nm_slices18to283_EM 160	206
AWCL	AIAL	SEM_L1_3_4nm_slices18to283_EM 161	236
AWCL	AIAL	SEM_L1_3_4nm_slices18to283_EM 162	242
AWCL	AIAL	SEM_L1_3_4nm_slices18to283_EM 163	212
AWCL	AIAL	SEM_L1_3_4nm_slices18to283_EM 164	244
AWCL	AIAL	SEM_L1_3_4nm_slices18to283_EM 165	250
AWCL	AIAL	SEM_L1_3_4nm_slices18to283_EM 166	251
AWCL	AIAL	SEM_L1_3_4nm_slices18to283_EM 167	243
AWCL	AIAL	SEM_L1_3_4nm_slices18to283_EM 168	224
AWCL	AIAL	SEM_L1_3_4nm_slices18to283_EM 169	238
AWCL	AIAL	SEM_L1_3_4nm_slices18to283_EM 170	454
AWCL	AIAL	SEM_L1_3_4nm_slices18to283_EM 171	309
AWCL	AIAL	SEM_L1_3_4nm_slices18to283_EM 172	296
AWCL	AIAL	SEM_L1_3_4nm_slices18to283_EM 173	271
AWCL	AIAL	SEM_L1_3_4nm_slices18to283_EM 174	212
AWCL	AIAL	SEM_L1_3_4nm_slices18to283_EM 175	158
AWCL	AIAL	SEM_L1_3_4nm_slices18to283_EM 177	48
AWCL	AIAL	SEM_L1_3_4nm_slices18to283_EM 183	57
AWCL	AIAL	SEM_L1_3_4nm_slices18to283_EM 184	34
AWCL	AIAL	SEM_L1_3_4nm_slices18to283_EM 185	52
AWCL	AIAL	SEM_L1_3_4nm_slices18to283_EM 186	77
AWCL	AIAL	SEM_L1_3_4nm_slices18to283_EM 187	79
AWCL	AIAL	SEM_L1_3_4nm_slices18to283_EM 188	58
AWCL	AIAL	SEM_L1_3_4nm_slices18to283_EM 189	48
AWCR	AIAL	SEM_L1_3_4nm_slices18to283_EM 109	88
AWCR	AIAL	SEM_L1_3_4nm_slices18to283_EM 110	314
AWCR	AIAL	SEM_L1_3_4nm_slices18to283_EM 111	576
AWCR	AIAL	SEM_L1_3_4nm_slices18to283_EM 112	346
AWCR	AIAL	SEM_L1_3_4nm_slices18to283_EM 113	348
AWCR	AIAL	SEM_L1_3_4nm_slices18to283_EM 114	282
AWCR	AIAL	SEM_L1_3_4nm_slices18to283_EM 115	202
AWCR	AIAL	SEM_L1_3_4nm_slices18to283_EM 116	91
AWCR	AIAL	SEM_L1_3_4nm_slices18to283_EM 117	63
AWCR	AIAL	SEM_L1_3_4nm_slices18to283_EM 132	60
AWCR	AIAL	SEM_L1_3_4nm_slices18to283_EM 133	39
AWCR	AIAL	SEM_L1_3_4nm_slices18to283_EM 149	154
AWCR	AIAL	SEM_L1_3_4nm_slices18to283_EM 150	265
AWCR	AIAL	SEM_L1_3_4nm_slices18to283_EM 151	81
AWCR	AIAL	SEM_L1_3_4nm_slices18to283_EM 151	217
AWCR	AIAL	SEM_L1_3_4nm_slices18to283_EM 153	44
CEPVL	AIAL	SEM_L1_3_4nm_slices18to283_EM 183	31
CEPVL	AIAL	SEM_L1_3_4nm_slices18to283_EM 184	66
CEPVL	AIAL	SEM_L1_3_4nm_slices18to283_EM 185	29
IL1DL	AIAL	SEM_L1_3_4nm_slices18to283_EM 121	12
PVQL	AIAL	SEM_L1_3_4nm_slices18to283_EM 115	80
PVQL	AIAL	SEM_L1_3_4nm_slices18to283_EM 116	117
PVQL	AIAL	SEM_L1_3_4nm_slices18to283_EM 117	145
PVQL	AIAL	SEM_L1_3_4nm_slices18to283_EM 118	109
PVQL	AIAL	SEM_L1_3_4nm_slices18to283_EM 119	102
PVQL	AIAL	SEM_L1_3_4nm_slices18to283_EM 178	64
PVQL	AIAL	SEM_L1_3_4nm_slices18to283_EM 179	159
PVQL	AIAL	SEM_L1_3_4nm_slices18to283_EM 180	165
PVQL	AIAL	SEM_L1_3_4nm_slices18to283_EM 181	179
PVQL	AIAL	SEM_L1_3_4nm_slices18to283_EM 182	229
PVQL	AIAL	SEM_L1_3_4nm_slices18to283_EM 182	19
PVQL	AIAL	SEM_L1_3_4nm_slices18to283_EM 183	248
PVQL	AIAL	SEM_L1_3_4nm_slices18to283_EM 184	217
PVQL	AIAL	SEM_L1_3_4nm_slices18to283_EM 185	274
PVQL	AIAL	SEM_L1_3_4nm_slices18to283_EM 186	222
PVQL	AIAL	SEM_L1_3_4nm_slices18to283_EM 187	185
PVQL	AIAL	SEM_L1_3_4nm_slices18to283_EM 188	78
PVQL	AIAL	SEM_L1_3_4nm_slices18to283_EM 189	16
PVQL	AIAL	SEM_L1_3_4nm_slices18to283_EM 203	45
PVQL	AIAL	SEM_L1_3_4nm_slices18to283_EM 204	38
PVQL	AIAL	SEM_L1_3_4nm_slices18to283_EM 204	178
PVQL	AIAL	SEM_L1_3_4nm_slices18to283_EM 205	282
PVQL	AIAL	SEM_L1_3_4nm_slices18to283_EM 206	39
RMGL	AIAL	SEM_L1_3_4nm_slices18to283_EM 203	12
RMGL	AIAL	SEM_L1_3_4nm_slices18to283_EM 204	38
RMGL	AIAL	SEM_L1_3_4nm_slices18to283_EM 205	30
ADFR	AIAR	SEM_L1_3_4nm_slices18to283_EM 98	193
ADFR	AIAR	SEM_L1_3_4nm_slices18to283_EM 99	189
ADFR	AIAR	SEM_L1_3_4nm_slices18to283_EM 100	177
ADFR	AIAR	SEM_L1_3_4nm_slices18to283_EM 101	163
ADFR	AIAR	SEM_L1_3_4nm_slices18to283_EM 102	30
ADFR	AIAR	SEM_L1_3_4nm_slices18to283_EM 103	73
ADFR	AIAR	SEM_L1_3_4nm_slices18to283_EM 104	62
ADFR	AIAR	SEM_L1_3_4nm_slices18to283_EM 105	79
ADFR	AIAR	SEM_L1_3_4nm_slices18to283_EM 106	111
ADFR	AIAR	SEM_L1_3_4nm_slices18to283_EM 107	20
ADFR	AIAR	SEM_L1_3_4nm_slices18to283_EM 116	93
ADFR	AIAR	SEM_L1_3_4nm_slices18to283_EM 117	66
ADFR	AIAR	SEM_L1_3_4nm_slices18to283_EM 118	28
ADFR	AIAR	SEM_L1_3_4nm_slices18to283_EM 119	28
ADFR	AIAR	SEM_L1_3_4nm_slices18to283_EM 120	10
ADFR	AIAR	SEM_L1_3_4nm_slices18to283_EM 128	115
ADFR	AIAR	SEM_L1_3_4nm_slices18to283_EM 129	121
ADFR	AIAR	SEM_L1_3_4nm_slices18to283_EM 130	77
ADFR	AIAR	SEM_L1_3_4nm_slices18to283_EM 215	113
ADFR	AIAR	SEM_L1_3_4nm_slices18to283_EM 216	74
ADFR	AIAR	SEM_L1_3_4nm_slices18to283_EM 217	71
ADFR	AIAR	SEM_L1_3_4nm_slices18to283_EM 218	77
ADFR	AIAR	SEM_L1_3_4nm_slices18to283_EM 219	69
ADFR	AIAR	SEM_L1_3_4nm_slices18to283_EM 220	78
ADFR	AIAR	SEM_L1_3_4nm_slices18to283_EM 221	70
ADFR	AIAR	SEM_L1_3_4nm_slices18to283_EM 222	54
ADLR	AIAR	SEM_L1_3_4nm_slices18to283_EM 112	81
ADLR	AIAR	SEM_L1_3_4nm_slices18to283_EM 113	196
ADLR	AIAR	SEM_L1_3_4nm_slices18to283_EM 134	93
ADLR	AIAR	SEM_L1_3_4nm_slices18to283_EM 136	58
ADLR	AIAR	SEM_L1_3_4nm_slices18to283_EM 137	116
ADLR	AIAR	SEM_L1_3_4nm_slices18to283_EM 138	115
ADLR	AIAR	SEM_L1_3_4nm_slices18to283_EM 139	104
ADLR	AIAR	SEM_L1_3_4nm_slices18to283_EM 140	39
ADLR	AIAR	SEM_L1_3_4nm_slices18to283_EM 141	60
ADLR	AIAR	SEM_L1_3_4nm_slices18to283_EM 142	59
ADLR	AIAR	SEM_L1_3_4nm_slices18to283_EM 143	61
ADLR	AIAR	SEM_L1_3_4nm_slices18to283_EM 144	61
ADLR	AIAR	SEM_L1_3_4nm_slices18to283_EM 144	58
ADLR	AIAR	SEM_L1_3_4nm_slices18to283_EM 145	67
ADLR	AIAR	SEM_L1_3_4nm_slices18to283_EM 145	74
ADLR	AIAR	SEM_L1_3_4nm_slices18to283_EM 146	89
ADLR	AIAR	SEM_L1_3_4nm_slices18to283_EM 146	152
ADLR	AIAR	SEM_L1_3_4nm_slices18to283_EM 147	82
ADLR	AIAR	SEM_L1_3_4nm_slices18to283_EM 147	129
ADLR	AIAR	SEM_L1_3_4nm_slices18to283_EM 148	64
ADLR	AIAR	SEM_L1_3_4nm_slices18to283_EM 149	82
ADLR	AIAR	SEM_L1_3_4nm_slices18to283_EM 150	66
ADLR	AIAR	SEM_L1_3_4nm_slices18to283_EM 151	17
AIAL	AIAR	SEM_L1_3_4nm_slices18to283_EM 109	53
AIAL	AIAR	SEM_L1_3_4nm_slices18to283_EM 110	65
AIAL	AIAR	SEM_L1_3_4nm_slices18to283_EM 111	8
AIBR	AIAR	SEM_L1_3_4nm_slices18to283_EM 101	211
AIBR	AIAR	SEM_L1_3_4nm_slices18to283_EM 102	269
AIBR	AIAR	SEM_L1_3_4nm_slices18to283_EM 102	43
AIBR	AIAR	SEM_L1_3_4nm_slices18to283_EM 103	266
AIBR	AIAR	SEM_L1_3_4nm_slices18to283_EM 103	2
AIBR	AIAR	SEM_L1_3_4nm_slices18to283_EM 104	234
AIBR	AIAR	SEM_L1_3_4nm_slices18to283_EM 105	306
AIBR	AIAR	SEM_L1_3_4nm_slices18to283_EM 106	90
AIBR	AIAR	SEM_L1_3_4nm_slices18to283_EM 106	271
AIBR	AIAR	SEM_L1_3_4nm_slices18to283_EM 106	39
AIBR	AIAR	SEM_L1_3_4nm_slices18to283_EM 107	302
AIBR	AIAR	SEM_L1_3_4nm_slices18to283_EM 109	231
AIBR	AIAR	SEM_L1_3_4nm_slices18to283_EM 110	70
AIBR	AIAR	SEM_L1_3_4nm_slices18to283_EM 110	41
AIBR	AIAR	SEM_L1_3_4nm_slices18to283_EM 111	54
AIBR	AIAR	SEM_L1_3_4nm_slices18to283_EM 112	65
AIBR	AIAR	SEM_L1_3_4nm_slices18to283_EM 113	66
AIBR	AIAR	SEM_L1_3_4nm_slices18to283_EM 114	57
AIBR	AIAR	SEM_L1_3_4nm_slices18to283_EM 115	71
AIBR	AIAR	SEM_L1_3_4nm_slices18to283_EM 116	15
AIBR	AIAR	SEM_L1_3_4nm_slices18to283_EM 117	63
AIBR	AIAR	SEM_L1_3_4nm_slices18to283_EM 118	18
AIBR	AIAR	SEM_L1_3_4nm_slices18to283_EM 119	72
AIBR	AIAR	SEM_L1_3_4nm_slices18to283_EM 120	80
AIBR	AIAR	SEM_L1_3_4nm_slices18to283_EM 121	59
AIBR	AIAR	SEM_L1_3_4nm_slices18to283_EM 122	83
AIBR	AIAR	SEM_L1_3_4nm_slices18to283_EM 122	40
AIBR	AIAR	SEM_L1_3_4nm_slices18to283_EM 123	142
AIBR	AIAR	SEM_L1_3_4nm_slices18to283_EM 124	220
AIBR	AIAR	SEM_L1_3_4nm_slices18to283_EM 127	204
AIBR	AIAR	SEM_L1_3_4nm_slices18to283_EM 128	212
AIBR	AIAR	SEM_L1_3_4nm_slices18to283_EM 129	201
AIBR	AIAR	SEM_L1_3_4nm_slices18to283_EM 130	192
AIBR	AIAR	SEM_L1_3_4nm_slices18to283_EM 131	137
AIBR	AIAR	SEM_L1_3_4nm_slices18to283_EM 132	194
AIBR	AIAR	SEM_L1_3_4nm_slices18to283_EM 132	143
AIBR	AIAR	SEM_L1_3_4nm_slices18to283_EM 133	185
AIBR	AIAR	SEM_L1_3_4nm_slices18to283_EM 133	180
AIBR	AIAR	SEM_L1_3_4nm_slices18to283_EM 133	86
AIBR	AIAR	SEM_L1_3_4nm_slices18to283_EM 134	163
AIBR	AIAR	SEM_L1_3_4nm_slices18to283_EM 134	242
AIBR	AIAR	SEM_L1_3_4nm_slices18to283_EM 134	92
AIBR	AIAR	SEM_L1_3_4nm_slices18to283_EM 135	137
AIBR	AIAR	SEM_L1_3_4nm_slices18to283_EM 135	513
AIBR	AIAR	SEM_L1_3_4nm_slices18to283_EM 136	765
AIBR	AIAR	SEM_L1_3_4nm_slices18to283_EM 137	627
AIBR	AIAR	SEM_L1_3_4nm_slices18to283_EM 138	192
AIBR	AIAR	SEM_L1_3_4nm_slices18to283_EM 138	166
AIBR	AIAR	SEM_L1_3_4nm_slices18to283_EM 139	125
AIBR	AIAR	SEM_L1_3_4nm_slices18to283_EM 139	187
AIBR	AIAR	SEM_L1_3_4nm_slices18to283_EM 140	183
AIBR	AIAR	SEM_L1_3_4nm_slices18to283_EM 141	168
AIBR	AIAR	SEM_L1_3_4nm_slices18to283_EM 142	237
AIBR	AIAR	SEM_L1_3_4nm_slices18to283_EM 143	189
AIBR	AIAR	SEM_L1_3_4nm_slices18to283_EM 144	219
AIBR	AIAR	SEM_L1_3_4nm_slices18to283_EM 144	300
AIBR	AIAR	SEM_L1_3_4nm_slices18to283_EM 145	431
AIBR	AIAR	SEM_L1_3_4nm_slices18to283_EM 146	495
AIBR	AIAR	SEM_L1_3_4nm_slices18to283_EM 147	536
AIBR	AIAR	SEM_L1_3_4nm_slices18to283_EM 148	254
AIBR	AIAR	SEM_L1_3_4nm_slices18to283_EM 149	62
AIBR	AIAR	SEM_L1_3_4nm_slices18to283_EM 150	39
AIBR	AIAR	SEM_L1_3_4nm_slices18to283_EM 151	71
AIBR	AIAR	SEM_L1_3_4nm_slices18to283_EM 152	57
AIBR	AIAR	SEM_L1_3_4nm_slices18to283_EM 153	53
AIBR	AIAR	SEM_L1_3_4nm_slices18to283_EM 154	108
AIBR	AIAR	SEM_L1_3_4nm_slices18to283_EM 155	50
AIBR	AIAR	SEM_L1_3_4nm_slices18to283_EM 156	49
AIBR	AIAR	SEM_L1_3_4nm_slices18to283_EM 157	10
AIBR	AIAR	SEM_L1_3_4nm_slices18to283_EM 158	50
AIBR	AIAR	SEM_L1_3_4nm_slices18to283_EM 159	52
AIBR	AIAR	SEM_L1_3_4nm_slices18to283_EM 160	45
AIBR	AIAR	SEM_L1_3_4nm_slices18to283_EM 161	45
AIBR	AIAR	SEM_L1_3_4nm_slices18to283_EM 162	51
AIBR	AIAR	SEM_L1_3_4nm_slices18to283_EM 163	81
AIBR	AIAR	SEM_L1_3_4nm_slices18to283_EM 164	79
AIBR	AIAR	SEM_L1_3_4nm_slices18to283_EM 165	117
AIBR	AIAR	SEM_L1_3_4nm_slices18to283_EM 166	152
AIBR	AIAR	SEM_L1_3_4nm_slices18to283_EM 167	165
AIBR	AIAR	SEM_L1_3_4nm_slices18to283_EM 168	152
AIBR	AIAR	SEM_L1_3_4nm_slices18to283_EM 169	177
AIBR	AIAR	SEM_L1_3_4nm_slices18to283_EM 170	179
AIBR	AIAR	SEM_L1_3_4nm_slices18to283_EM 171	150
AIBR	AIAR	SEM_L1_3_4nm_slices18to283_EM 172	160
AIBR	AIAR	SEM_L1_3_4nm_slices18to283_EM 173	144
AIBR	AIAR	SEM_L1_3_4nm_slices18to283_EM 174	144
AIBR	AIAR	SEM_L1_3_4nm_slices18to283_EM 175	130
AIBR	AIAR	SEM_L1_3_4nm_slices18to283_EM 176	115
AIBR	AIAR	SEM_L1_3_4nm_slices18to283_EM 177	135
AIBR	AIAR	SEM_L1_3_4nm_slices18to283_EM 178	163
AIBR	AIAR	SEM_L1_3_4nm_slices18to283_EM 179	179
AIBR	AIAR	SEM_L1_3_4nm_slices18to283_EM 180	193
AIBR	AIAR	SEM_L1_3_4nm_slices18to283_EM 181	199
AIBR	AIAR	SEM_L1_3_4nm_slices18to283_EM 182	207
AIBR	AIAR	SEM_L1_3_4nm_slices18to283_EM 183	215
AIBR	AIAR	SEM_L1_3_4nm_slices18to283_EM 184	225
AIBR	AIAR	SEM_L1_3_4nm_slices18to283_EM 185	220
AIBR	AIAR	SEM_L1_3_4nm_slices18to283_EM 186	233
AIBR	AIAR	SEM_L1_3_4nm_slices18to283_EM 187	246
AIBR	AIAR	SEM_L1_3_4nm_slices18to283_EM 188	234
AIBR	AIAR	SEM_L1_3_4nm_slices18to283_EM 189	238
AIBR	AIAR	SEM_L1_3_4nm_slices18to283_EM 190	236
AIBR	AIAR	SEM_L1_3_4nm_slices18to283_EM 191	244
AIBR	AIAR	SEM_L1_3_4nm_slices18to283_EM 192	192
AIBR	AIAR	SEM_L1_3_4nm_slices18to283_EM 193	238
AIBR	AIAR	SEM_L1_3_4nm_slices18to283_EM 194	232
AIBR	AIAR	SEM_L1_3_4nm_slices18to283_EM 195	214
AIBR	AIAR	SEM_L1_3_4nm_slices18to283_EM 196	199
AIBR	AIAR	SEM_L1_3_4nm_slices18to283_EM 197	102
AIBR	AIAR	SEM_L1_3_4nm_slices18to283_EM 198	42
AIBR	AIAR	SEM_L1_3_4nm_slices18to283_EM 199	34
AIMR	AIAR	SEM_L1_3_4nm_slices18to283_EM 112	46
AIMR	AIAR	SEM_L1_3_4nm_slices18to283_EM 113	40
AIMR	AIAR	SEM_L1_3_4nm_slices18to283_EM 153	65
AIMR	AIAR	SEM_L1_3_4nm_slices18to283_EM 154	89
AIMR	AIAR	SEM_L1_3_4nm_slices18to283_EM 154	94
AIMR	AIAR	SEM_L1_3_4nm_slices18to283_EM 155	53
AIMR	AIAR	SEM_L1_3_4nm_slices18to283_EM 155	138
AIMR	AIAR	SEM_L1_3_4nm_slices18to283_EM 156	106
AIMR	AIAR	SEM_L1_3_4nm_slices18to283_EM 157	68
AIMR	AIAR	SEM_L1_3_4nm_slices18to283_EM 158	75
AIMR	AIAR	SEM_L1_3_4nm_slices18to283_EM 159	91
AIMR	AIAR	SEM_L1_3_4nm_slices18to283_EM 160	97
AIMR	AIAR	SEM_L1_3_4nm_slices18to283_EM 161	89
AIMR	AIAR	SEM_L1_3_4nm_slices18to283_EM 162	85
AIMR	AIAR	SEM_L1_3_4nm_slices18to283_EM 163	91
AIMR	AIAR	SEM_L1_3_4nm_slices18to283_EM 164	93
AIMR	AIAR	SEM_L1_3_4nm_slices18to283_EM 165	200
AIMR	AIAR	SEM_L1_3_4nm_slices18to283_EM 166	216
AIMR	AIAR	SEM_L1_3_4nm_slices18to283_EM 167	212
AIMR	AIAR	SEM_L1_3_4nm_slices18to283_EM 168	208
AIMR	AIAR	SEM_L1_3_4nm_slices18to283_EM 169	176
AIMR	AIAR	SEM_L1_3_4nm_slices18to283_EM 170	159
AIMR	AIAR	SEM_L1_3_4nm_slices18to283_EM 171	162
AIMR	AIAR	SEM_L1_3_4nm_slices18to283_EM 172	142
AIMR	AIAR	SEM_L1_3_4nm_slices18to283_EM 173	166
AIMR	AIAR	SEM_L1_3_4nm_slices18to283_EM 174	147
AIMR	AIAR	SEM_L1_3_4nm_slices18to283_EM 175	125
AIMR	AIAR	SEM_L1_3_4nm_slices18to283_EM 176	112
AIMR	AIAR	SEM_L1_3_4nm_slices18to283_EM 177	127
AIMR	AIAR	SEM_L1_3_4nm_slices18to283_EM 178	122
AIMR	AIAR	SEM_L1_3_4nm_slices18to283_EM 179	120
AIMR	AIAR	SEM_L1_3_4nm_slices18to283_EM 180	121
AIMR	AIAR	SEM_L1_3_4nm_slices18to283_EM 181	142
AIMR	AIAR	SEM_L1_3_4nm_slices18to283_EM 182	114
AIMR	AIAR	SEM_L1_3_4nm_slices18to283_EM 183	94
[truncated: 62,502 more rows]
