# Supplementary material for: Exploring neurodevelopment via spatiotemporal collation of anatomical networks with NeuroSC
Source: eLife. 2025 Oct 21;13:RP103977. doi: 10.7554/eLife.103977 (PMC12539806; doi:10.7554/eLife.103977)
Supplement: Supplementary file 9. — Type the name of a ‘Neuron of Interest’ (NOI) in the indicated cell to filter for the summed adjacency counts for each contact partner. For each partner, there are two columns: Total number of contacts (number of EM sections NOI and partner are in contact) and Total Weights (summed number of pixels NOI and partner contacts). [file elife-103977-supp9.xlsx]

## Sheet: L1_5hr
Neuron1	Neuron2	Section	Weight				Partner	# of contacts	Total Weights			Partner	# of contacts for XXX-L	Total Weights for XXX-L	# of contacts for XXX-R	Total Weights for XXX-R
PVQL	ADAL	TEM_L1_5_EM_slices15to270 136	170		aser		AIAL	9	1410	Write your NOI here		ADAL	0	0	0	0
PVQL	ADAL	TEM_L1_5_EM_slices15to270 137	206				ASEL	7	610			ADAR	0	0	0	0
PVQL	ADAL	TEM_L1_5_EM_slices15to270 137	181				AWCL	19	2270			ADEL	0	0	0	0
RIVR	ADAL	TEM_L1_5_EM_slices15to270 93	90				RIMR	0	0			ADER	0	0	0	0
RIVR	ADAL	TEM_L1_5_EM_slices15to270 94	112				RIVL	0	0	Write your NOI hereL		ADFL	0	0	0	0
RIVR	ADAL	TEM_L1_5_EM_slices15to270 95	35				SMDDR	0	0	Write your NOI hereR		ADFR	0	0	0	0
RIVR	ADAL	TEM_L1_5_EM_slices15to270 95	133				AVAL	0	0			ADLL	0	0	0	0
RIVR	ADAL	TEM_L1_5_EM_slices15to270 96	164				AINL	4	213			ADLR	0	0	0	0
RIVR	ADAL	TEM_L1_5_EM_slices15to270 97	179				AIZR	17	2223			AFDL	0	0	0	0
SAAVL	ADAL	TEM_L1_5_EM_slices15to270 77	77				RIGR	0	0			AFDR	0	0	0	0
SAAVL	ADAL	TEM_L1_5_EM_slices15to270 78	116				ASHL	0	0			AIAL	0	0	0	0
ADAL	ADAR	TEM_L1_5_EM_slices15to270 80	99				ASER	0	0			AIAR	0	0	0	0
ADAL	ADAR	TEM_L1_5_EM_slices15to270 81	112				ASKL	0	0			AIBL	0	0	0	0
ADAL	ADAR	TEM_L1_5_EM_slices15to270 82	125				SMBDR	0	0			AIBR	0	0	0	0
ADAL	ADAR	TEM_L1_5_EM_slices15to270 83	211				AVKR	0	0			AIML	0	0	0	0
ADAL	ADAR	TEM_L1_5_EM_slices15to270 84	187				DVC	0	0			AIMR	0	0	0	0
ADAL	ADAR	TEM_L1_5_EM_slices15to270 85	133				ASGL	0	0			AINL	0	0	0	0
ADAL	ADAR	TEM_L1_5_EM_slices15to270 86	73				AVEL	0	0			AINR	0	0	0	0
BDUR	ADAR	TEM_L1_5_EM_slices15to270 129	186				AFDL	38	7038			AIYL	0	0	0	0
BDUR	ADAR	TEM_L1_5_EM_slices15to270 130	198				AVBL	0	0			AIYR	0	0	0	0
BDUR	ADAR	TEM_L1_5_EM_slices15to270 131	198				AVKL	0	0			AIZL	0	0	0	0
BDUR	ADAR	TEM_L1_5_EM_slices15to270 132	162				AIBR	87	19967			AIZR	0	0	0	0
BDUR	ADAR	TEM_L1_5_EM_slices15to270 133	198				SIADR	0	0			ALA	0	0	0	0
BDUR	ADAR	TEM_L1_5_EM_slices15to270 135	172				ADLL	0	0			ALML	0	0	0	0
BDUR	ADAR	TEM_L1_5_EM_slices15to270 136	186				SAADR	0	0			ALMR	0	0	0	0
BDUR	ADAR	TEM_L1_5_EM_slices15to270 137	135				SAADL	0	0			ALNL	0	0	0	0
BDUR	ADAR	TEM_L1_5_EM_slices15to270 138	151				BAGL	2	158			ALNR	0	0	0	0
BDUR	ADAR	TEM_L1_5_EM_slices15to270 139	132				PVT	0	0			AQR	0	0	0	0
BDUR	ADAR	TEM_L1_5_EM_slices15to270 140	218				ASIL	4	1108			ASEL	0	0	0	0
BDUR	ADAR	TEM_L1_5_EM_slices15to270 141	167				AVER	0	0			ASER	0	0	0	0
BDUR	ADAR	TEM_L1_5_EM_slices15to270 142	134				RIML	0	0			ASGL	0	0	0	0
BDUR	ADAR	TEM_L1_5_EM_slices15to270 143	201				AWBL	4	215			ASGR	0	0	0	0
BDUR	ADAR	TEM_L1_5_EM_slices15to270 144	181				RICR	0	0			ASHL	0	0	0	0
PVCR	ADAR	TEM_L1_5_EM_slices15to270 144	28				ADAR	0	0			ASHR	0	0	0	0
PVCR	ADAR	TEM_L1_5_EM_slices15to270 189	68				AWCR	106	22438			ASIL	0	0	0	0
PVCR	ADAR	TEM_L1_5_EM_slices15to270 190	32				AINR	47	7996			ASIR	0	0	0	0
RIVR	ADAR	TEM_L1_5_EM_slices15to270 95	72				URYVR	0	0			ASJL	0	0	0	0
RIVR	ADAR	TEM_L1_5_EM_slices15to270 96	128				SIBVR	0	0			ASJR	0	0	0	0
RIVR	ADAR	TEM_L1_5_EM_slices15to270 97	133				RIAR	0	0			ASKL	0	0	0	0
SAAVL	ADAR	TEM_L1_5_EM_slices15to270 80	9				PVQL	0	0			ASKR	0	0	0	0
SAAVL	ADAR	TEM_L1_5_EM_slices15to270 81	153				DVA	0	0			AUAL	0	0	0	0
SAAVL	ADAR	TEM_L1_5_EM_slices15to270 82	123				RIBR	0	0			AUAR	0	0	0	0
SAAVL	ADAR	TEM_L1_5_EM_slices15to270 83	116				AIYL	44	11116			AVAL	0	0	0	0
SAAVL	ADAR	TEM_L1_5_EM_slices15to270 84	159				URAVR	0	0			AVAR	0	0	0	0
SAAVL	ADAR	TEM_L1_5_EM_slices15to270 85	142				AVDL	0	0			AVBL	0	0	0	0
SAAVL	ADAR	TEM_L1_5_EM_slices15to270 86	151				AVL	0	0			AVBR	0	0	0	0
SAAVL	ADAR	TEM_L1_5_EM_slices15to270 87	71				URYDR	0	0			AVDL	0	0	0	0
SAAVL	ADAR	TEM_L1_5_EM_slices15to270 88	105				ADFR	18	2937			AVDR	0	0	0	0
SAAVL	ADAR	TEM_L1_5_EM_slices15to270 89	175				SIBVL	0	0			AVEL	0	0	0	0
SAAVL	ADAR	TEM_L1_5_EM_slices15to270 90	165				SAAVL	4	198			AVER	0	0	0	0
SIAVR	ADAR	TEM_L1_5_EM_slices15to270 101	86				AWBR	67	10328			AVFL	0	0	0	0
SIAVR	ADAR	TEM_L1_5_EM_slices15to270 101	100				RIVR	0	0			AVFR	0	0	0	0
SIAVR	ADAR	TEM_L1_5_EM_slices15to270 102	117				AUAR	1	29			AVHL	0	0	0	0
SIAVR	ADAR	TEM_L1_5_EM_slices15to270 102	54				IL2VR	0	0			AVHR	0	0	0	0
SIAVR	ADAR	TEM_L1_5_EM_slices15to270 103	177				AUAL	0	0			AVJL	0	0	0	0
SIAVR	ADAR	TEM_L1_5_EM_slices15to270 104	94				AWAL	0	0			AVJR	0	0	0	0
SIAVR	ADAR	TEM_L1_5_EM_slices15to270 120	18				SAAVR	0	0			AVKL	0	0	0	0
SIAVR	ADAR	TEM_L1_5_EM_slices15to270 139	28				AVDR	0	0			AVKR	0	0	0	0
SIAVR	ADAR	TEM_L1_5_EM_slices15to270 177	70				OLLR	0	0			AVL	0	0	0	0
SIAVR	ADAR	TEM_L1_5_EM_slices15to270 178	85				SMBVR	0	0			AVM	0	0	0	0
SIAVR	ADAR	TEM_L1_5_EM_slices15to270 179	81				BAGR	6	1051			AWAL	0	0	0	0
URYDR	ADAR	TEM_L1_5_EM_slices15to270 91	128				SIBDL	0	0			AWAR	0	0	0	0
URYDR	ADAR	TEM_L1_5_EM_slices15to270 92	80				RMGR	0	0			AWBL	0	0	0	0
URYDR	ADAR	TEM_L1_5_EM_slices15to270 93	54				ADFL	1	130			AWBR	0	0	0	0
URYDR	ADAR	TEM_L1_5_EM_slices15to270 94	50				SMDVR	0	0			AWCL	0	0	0	0
URYDR	ADAR	TEM_L1_5_EM_slices15to270 95	83				IL2DR	0	0			AWCR	0	0	0	0
URYDR	ADAR	TEM_L1_5_EM_slices15to270 96	76				URXL	0	0			BAGL	0	0	0	0
URYDR	ADAR	TEM_L1_5_EM_slices15to270 97	69				RMEV	0	0			BAGR	0	0	0	0
URYDR	ADAR	TEM_L1_5_EM_slices15to270 98	55				IL2R	0	0			BDUL	0	0	0	0
URYDR	ADAR	TEM_L1_5_EM_slices15to270 99	49				RICL	0	0			BDUR	0	0	0	0
URYDR	ADAR	TEM_L1_5_EM_slices15to270 100	60				AIZL	24	4728			CEPDL	0	0	0	0
URYDR	ADAR	TEM_L1_5_EM_slices15to270 101	12				CEPVR	0	0			CEPDR	0	0	0	0
AVAL	ADEL	TEM_L1_5_EM_slices15to270 191	51				RIGL	0	0			CEPVL	0	0	0	0
AVAL	ADEL	TEM_L1_5_EM_slices15to270 193	73				IL1DL	4	547			CEPVR	0	0	0	0
DVC	ADEL	TEM_L1_5_EM_slices15to270 188	160				PVPR	1	9			DVA	0	0	0	0
DVC	ADEL	TEM_L1_5_EM_slices15to270 189	143				RIAL	3	320			DVC	0	0	0	0
DVC	ADEL	TEM_L1_5_EM_slices15to270 190	111				IL2L	4	151			FLPL	0	0	0	0
DVC	ADEL	TEM_L1_5_EM_slices15to270 191	58				RIFL	0	0			FLPR	0	0	0	0
PVT	ADEL	TEM_L1_5_EM_slices15to270 190	64				IL1L	0	0			HSNL	0	0	0	0
PVT	ADEL	TEM_L1_5_EM_slices15to270 191	85				SIBDR	0	0			HSNR	0	0	0	0
PVT	ADEL	TEM_L1_5_EM_slices15to270 193	109				SMDDL	0	0			IL1DL	0	0	0	0
RIGL	ADEL	TEM_L1_5_EM_slices15to270 188	160				ADAL	0	0			IL1DR	0	0	0	0
RIGL	ADEL	TEM_L1_5_EM_slices15to270 189	153				ADEL	0	0			IL1L	0	0	0	0
RIGL	ADEL	TEM_L1_5_EM_slices15to270 190	156				ADER	0	0			IL1R	0	0	0	0
RIGL	ADEL	TEM_L1_5_EM_slices15to270 191	167				ADLR	19	4345			IL1VL	0	0	0	0
RIGL	ADEL	TEM_L1_5_EM_slices15to270 193	176				AFDR	0	0			IL1VR	0	0	0	0
RIGR	ADEL	TEM_L1_5_EM_slices15to270 189	16				AIAR	31	4351			IL2DL	0	0	0	0
RIGR	ADEL	TEM_L1_5_EM_slices15to270 190	64				AIBL	11	1365			IL2DR	0	0	0	0
RIGR	ADEL	TEM_L1_5_EM_slices15to270 191	61				AIML	0	0			IL2L	0	0	0	0
RIGR	ADEL	TEM_L1_5_EM_slices15to270 193	98				AIMR	4	374			IL2R	0	0	0	0
SIADL	ADEL	TEM_L1_5_EM_slices15to270 191	38				AIYR	55	15308			IL2VL	0	0	0	0
SIADL	ADEL	TEM_L1_5_EM_slices15to270 193	20				ALA	2	70			IL2VR	0	0	0	0
ADAL	ADFL	TEM_L1_5_EM_slices15to270 145	87				ALML	0	0			OLLL	0	0	0	0
ADAL	ADFL	TEM_L1_5_EM_slices15to270 147	86				ALMR	4	339			OLLR	0	0	0	0
ADAL	ADFL	TEM_L1_5_EM_slices15to270 148	74				ALNL	0	0			OLQDL	0	0	0	0
ADAL	ADFL	TEM_L1_5_EM_slices15to270 149	69				ALNR	0	0			OLQDR	0	0	0	0
ADAL	ADFL	TEM_L1_5_EM_slices15to270 150	83				AQR	0	0			OLQVL	0	0	0	0
ADFR	ADFL	TEM_L1_5_EM_slices15to270 92	123				ASGR	8	1059			OLQVR	0	0	0	0
ADFR	ADFL	TEM_L1_5_EM_slices15to270 94	307				ASHR	33	3942			PLNL	0	0	0	0
ADFR	ADFL	TEM_L1_5_EM_slices15to270 95	268				ASIR	21	2210			PLNR	0	0	0	0
ADFR	ADFL	TEM_L1_5_EM_slices15to270 96	77				ASJL	0	0			PVCL	0	0	0	0
ADFR	ADFL	TEM_L1_5_EM_slices15to270 96	174				ASJR	3	100			PVCR	0	0	0	0
ADFR	ADFL	TEM_L1_5_EM_slices15to270 97	52				ASKR	20	1714			PVNL	0	0	0	0
ADFR	ADFL	TEM_L1_5_EM_slices15to270 97	101				AVAR	0	0			PVNR	0	0	0	0
AFDL	ADFL	TEM_L1_5_EM_slices15to270 94	178				AVBR	0	0			PVPL	0	0	0	0
AFDL	ADFL	TEM_L1_5_EM_slices15to270 95	257				AVFL	0	0			PVPR	0	0	0	0
AFDL	ADFL	TEM_L1_5_EM_slices15to270 96	257				AVFR	0	0			PVQL	0	0	0	0
AFDL	ADFL	TEM_L1_5_EM_slices15to270 97	249				AVHL	4	245			PVQR	0	0	0	0
AFDL	ADFL	TEM_L1_5_EM_slices15to270 98	237				AVHR	0	0			PVR	0	0	0	0
AFDL	ADFL	TEM_L1_5_EM_slices15to270 99	187				AVJL	0	0			PVT	0	0	0	0
AFDL	ADFL	TEM_L1_5_EM_slices15to270 100	101				AVJR	0	0			RIAL	0	0	0	0
AFDL	ADFL	TEM_L1_5_EM_slices15to270 105	58				AVM	0	0			RIAR	0	0	0	0
AFDL	ADFL	TEM_L1_5_EM_slices15to270 116	149				AWAR	92	21775			RIBL	0	0	0	0
AFDL	ADFL	TEM_L1_5_EM_slices15to270 117	140				BDUL	0	0			RIBR	0	0	0	0
AFDL	ADFL	TEM_L1_5_EM_slices15to270 118	123				BDUR	0	0			RICL	0	0	0	0
AFDL	ADFL	TEM_L1_5_EM_slices15to270 119	91				CEPDL	3	195			RICR	0	0	0	0
AFDL	ADFL	TEM_L1_5_EM_slices15to270 121	67				CEPDR	0	0			RID	0	0	0	0
AFDL	ADFL	TEM_L1_5_EM_slices15to270 122	156				CEPVL	0	0			RIFL	0	0	0	0
AFDL	ADFL	TEM_L1_5_EM_slices15to270 123	195				FLPL	0	0			RIFR	0	0	0	0
AFDL	ADFL	TEM_L1_5_EM_slices15to270 124	177				FLPR	0	0			RIGL	0	0	0	0
AFDL	ADFL	TEM_L1_5_EM_slices15to270 125	491				HSNL	0	0			RIGR	0	0	0	0
AFDL	ADFL	TEM_L1_5_EM_slices15to270 126	447				HSNR	0	0			RIH	0	0	0	0
AFDL	ADFL	TEM_L1_5_EM_slices15to270 127	425				IL1DR	0	0			RIML	0	0	0	0
AFDL	ADFL	TEM_L1_5_EM_slices15to270 128	471				IL1R	0	0			RIMR	0	0	0	0
AFDL	ADFL	TEM_L1_5_EM_slices15to270 129	100				IL1VL	0	0			RIPL	0	0	0	0
AFDL	ADFL	TEM_L1_5_EM_slices15to270 130	126				IL1VR	0	0			RIPR	0	0	0	0
AFDL	ADFL	TEM_L1_5_EM_slices15to270 131	145				IL2DL	4	293			RIR	0	0	0	0
AFDL	ADFL	TEM_L1_5_EM_slices15to270 132	210				IL2VL	0	0			RIS	0	0	0	0
AFDL	ADFL	TEM_L1_5_EM_slices15to270 133	166				OLLL	2	70			RIVL	0	0	0	0
AFDL	ADFL	TEM_L1_5_EM_slices15to270 134	136				OLQDL	2	127			RIVR	0	0	0	0
AFDL	ADFL	TEM_L1_5_EM_slices15to270 137	78				OLQDR	0	0			RMDDL	0	0	0	0
AFDL	ADFL	TEM_L1_5_EM_slices15to270 138	88				OLQVL	0	0			RMDDR	0	0	0	0
AFDL	ADFL	TEM_L1_5_EM_slices15to270 139	157				OLQVR	0	0			RMDL	0	0	0	0
AFDL	ADFL	TEM_L1_5_EM_slices15to270 140	144				PLNL	0	0			RMDR	0	0	0	0
AFDL	ADFL	TEM_L1_5_EM_slices15to270 141	154				PLNR	0	0			RMDVL	0	0	0	0
AFDL	ADFL	TEM_L1_5_EM_slices15to270 142	149				PVCL	0	0			RMDVR	0	0	0	0
AFDL	ADFL	TEM_L1_5_EM_slices15to270 143	114				PVCR	0	0			RMED	0	0	0	0
AFDL	ADFL	TEM_L1_5_EM_slices15to270 144	77				PVNL	0	0			RMEL	0	0	0	0
AIAL	ADFL	TEM_L1_5_EM_slices15to270 106	115				PVNR	0	0			RMER	0	0	0	0
AIAL	ADFL	TEM_L1_5_EM_slices15to270 107	331				PVPL	0	0			RMEV	0	0	0	0
AIAL	ADFL	TEM_L1_5_EM_slices15to270 107	77				PVQR	17	1950			RMFL	0	0	0	0
AIAL	ADFL	TEM_L1_5_EM_slices15to270 111	43				PVR	0	0			RMFR	0	0	0	0
AIAL	ADFL	TEM_L1_5_EM_slices15to270 112	58				RIBL	0	0			RMGL	0	0	0	0
AIAL	ADFL	TEM_L1_5_EM_slices15to270 113	61				RID	0	0			RMGR	0	0	0	0
AIAL	ADFL	TEM_L1_5_EM_slices15to270 114	49				RIFR	8	786			RMHL	0	0	0	0
AIAL	ADFL	TEM_L1_5_EM_slices15to270 115	89				RIH	0	0			RMHR	0	0	0	0
AIAL	ADFL	TEM_L1_5_EM_slices15to270 116	84				RIPL	0	0			SAADL	0	0	0	0
AIAL	ADFL	TEM_L1_5_EM_slices15to270 117	104				RIPR	0	0			SAADR	0	0	0	0
AIAL	ADFL	TEM_L1_5_EM_slices15to270 117	51				RIR	0	0			SAAVL	0	0	0	0
AIAL	ADFL	TEM_L1_5_EM_slices15to270 118	71				RIS	0	0			SAAVR	0	0	0	0
AIAL	ADFL	TEM_L1_5_EM_slices15to270 118	68				RMDDL	0	0			SDQL	0	0	0	0
AIBL	ADFL	TEM_L1_5_EM_slices15to270 89	8				RMDDR	0	0			SDQR	0	0	0	0
AIBL	ADFL	TEM_L1_5_EM_slices15to270 90	62				RMDL	0	0			SIADL	0	0	0	0
AIBL	ADFL	TEM_L1_5_EM_slices15to270 93	126				RMDR	0	0			SIADR	0	0	0	0
AIBL	ADFL	TEM_L1_5_EM_slices15to270 94	250				RMDVL	0	0			SIAVL	0	0	0	0
AIBL	ADFL	TEM_L1_5_EM_slices15to270 95	228				RMDVR	0	0			SIAVR	0	0	0	0
AIBL	ADFL	TEM_L1_5_EM_slices15to270 96	197				RMED	0	0			SIBDL	0	0	0	0
AIBL	ADFL	TEM_L1_5_EM_slices15to270 98	25				RMEL	0	0			SIBDR	0	0	0	0
AIBL	ADFL	TEM_L1_5_EM_slices15to270 106	156				RMER	0	0			SIBVL	0	0	0	0
AIBL	ADFL	TEM_L1_5_EM_slices15to270 107	125				RMFL	0	0			SIBVR	0	0	0	0
AIBR	ADFL	TEM_L1_5_EM_slices15to270 89	26				RMFR	0	0			SMBDL	0	0	0	0
AIBR	ADFL	TEM_L1_5_EM_slices15to270 90	52				RMGL	0	0			SMBDR	0	0	0	0
AIBR	ADFL	TEM_L1_5_EM_slices15to270 90	52				RMHL	0	0			SMBVL	0	0	0	0
AIBR	ADFL	TEM_L1_5_EM_slices15to270 91	106				RMHR	0	0			SMBVR	0	0	0	0
AIBR	ADFL	TEM_L1_5_EM_slices15to270 91	71				SDQL	0	0			SMDDL	0	0	0	0
AIBR	ADFL	TEM_L1_5_EM_slices15to270 94	199				SDQR	0	0			SMDDR	0	0	0	0
AIBR	ADFL	TEM_L1_5_EM_slices15to270 95	187				SIADL	0	0			SMDVL	0	0	0	0
AIBR	ADFL	TEM_L1_5_EM_slices15to270 96	118				SIAVL	0	0			SMDVR	0	0	0	0
AIBR	ADFL	TEM_L1_5_EM_slices15to270 96	92				SIAVR	0	0			URADL	0	0	0	0
AIYL	ADFL	TEM_L1_5_EM_slices15to270 98	106				SMBDL	0	0			URADR	0	0	0	0
AIYL	ADFL	TEM_L1_5_EM_slices15to270 99	126				SMBVL	0	0			URAVL	0	0	0	0
AIYL	ADFL	TEM_L1_5_EM_slices15to270 99	106				SMDVL	0	0			URAVR	0	0	0	0
AIYL	ADFL	TEM_L1_5_EM_slices15to270 100	129				URADL	0	0			URBL	0	0	0	0
AIYL	ADFL	TEM_L1_5_EM_slices15to270 100	164				URADR	0	0			URBR	0	0	0	0
AIYL	ADFL	TEM_L1_5_EM_slices15to270 100	105				URAVL	0	0			URXL	0	0	0	0
AIYL	ADFL	TEM_L1_5_EM_slices15to270 101	957				URBL	0	0			URXR	0	0	0	0
AIYL	ADFL	TEM_L1_5_EM_slices15to270 102	266				URBR	0	0			URYDL	0	0	0	0
AIYL	ADFL	TEM_L1_5_EM_slices15to270 102	500				URXR	0	0			URYDR	0	0	0	0
AIYL	ADFL	TEM_L1_5_EM_slices15to270 103	286				URYDL	0	0			URYVL	0	0	0	0
AIYL	ADFL	TEM_L1_5_EM_slices15to270 103	399				URYVL	0	0			URYVR	0	0	0	0
AIYL	ADFL	TEM_L1_5_EM_slices15to270 104	337				VB01	0	0			VB01	0	0	0	0
AIYL	ADFL	TEM_L1_5_EM_slices15to270 104	110
AIYL	ADFL	TEM_L1_5_EM_slices15to270 104	214
AIYL	ADFL	TEM_L1_5_EM_slices15to270 105	96
AIYL	ADFL	TEM_L1_5_EM_slices15to270 105	80
AIYL	ADFL	TEM_L1_5_EM_slices15to270 105	135
AIYL	ADFL	TEM_L1_5_EM_slices15to270 113	260
AIYL	ADFL	TEM_L1_5_EM_slices15to270 114	36
AIYL	ADFL	TEM_L1_5_EM_slices15to270 114	357
AIYL	ADFL	TEM_L1_5_EM_slices15to270 115	160
AIYL	ADFL	TEM_L1_5_EM_slices15to270 115	108
AIYL	ADFL	TEM_L1_5_EM_slices15to270 116	780
AIYL	ADFL	TEM_L1_5_EM_slices15to270 117	879
AIYL	ADFL	TEM_L1_5_EM_slices15to270 118	821
AIYL	ADFL	TEM_L1_5_EM_slices15to270 119	578
AIYL	ADFL	TEM_L1_5_EM_slices15to270 120	124
AIYL	ADFL	TEM_L1_5_EM_slices15to270 120	317
AIYL	ADFL	TEM_L1_5_EM_slices15to270 121	129
AIYL	ADFL	TEM_L1_5_EM_slices15to270 121	158
AIYL	ADFL	TEM_L1_5_EM_slices15to270 122	86
AIYL	ADFL	TEM_L1_5_EM_slices15to270 122	26
AIYL	ADFL	TEM_L1_5_EM_slices15to270 123	23
AIYL	ADFL	TEM_L1_5_EM_slices15to270 144	74
AIYL	ADFL	TEM_L1_5_EM_slices15to270 145	139
AIYL	ADFL	TEM_L1_5_EM_slices15to270 146	158
AIYL	ADFL	TEM_L1_5_EM_slices15to270 147	116
AIYL	ADFL	TEM_L1_5_EM_slices15to270 147	148
AIYL	ADFL	TEM_L1_5_EM_slices15to270 148	231
AIYL	ADFL	TEM_L1_5_EM_slices15to270 149	203
AIYL	ADFL	TEM_L1_5_EM_slices15to270 150	172
AIYL	ADFL	TEM_L1_5_EM_slices15to270 151	160
AIYL	ADFL	TEM_L1_5_EM_slices15to270 152	193
AIYL	ADFL	TEM_L1_5_EM_slices15to270 153	204
AIYL	ADFL	TEM_L1_5_EM_slices15to270 154	239
AIYL	ADFL	TEM_L1_5_EM_slices15to270 155	275
AIYL	ADFL	TEM_L1_5_EM_slices15to270 156	274
AIYL	ADFL	TEM_L1_5_EM_slices15to270 157	255
AIYL	ADFL	TEM_L1_5_EM_slices15to270 158	254
AIYL	ADFL	TEM_L1_5_EM_slices15to270 159	217
AIYL	ADFL	TEM_L1_5_EM_slices15to270 160	121
AIYL	ADFL	TEM_L1_5_EM_slices15to270 161	117
AIYL	ADFL	TEM_L1_5_EM_slices15to270 162	79
AIYL	ADFL	TEM_L1_5_EM_slices15to270 163	62
AIYL	ADFL	TEM_L1_5_EM_slices15to270 164	57
AIYL	ADFL	TEM_L1_5_EM_slices15to270 166	67
AIYR	ADFL	TEM_L1_5_EM_slices15to270 95	46
AIYR	ADFL	TEM_L1_5_EM_slices15to270 96	46
AIZL	ADFL	TEM_L1_5_EM_slices15to270 88	48
AIZL	ADFL	TEM_L1_5_EM_slices15to270 90	160
AIZL	ADFL	TEM_L1_5_EM_slices15to270 91	160
AIZL	ADFL	TEM_L1_5_EM_slices15to270 97	108
AIZL	ADFL	TEM_L1_5_EM_slices15to270 98	87
AIZL	ADFL	TEM_L1_5_EM_slices15to270 102	78
AIZL	ADFL	TEM_L1_5_EM_slices15to270 102	115
AIZL	ADFL	TEM_L1_5_EM_slices15to270 103	99
AIZL	ADFL	TEM_L1_5_EM_slices15to270 103	103
AIZL	ADFL	TEM_L1_5_EM_slices15to270 104	113
AIZL	ADFL	TEM_L1_5_EM_slices15to270 104	102
AIZL	ADFL	TEM_L1_5_EM_slices15to270 105	158
AIZL	ADFL	TEM_L1_5_EM_slices15to270 105	136
AIZL	ADFL	TEM_L1_5_EM_slices15to270 105	60
AIZL	ADFL	TEM_L1_5_EM_slices15to270 106	165
AIZL	ADFL	TEM_L1_5_EM_slices15to270 106	120
AIZL	ADFL	TEM_L1_5_EM_slices15to270 107	207
AIZL	ADFL	TEM_L1_5_EM_slices15to270 111	64
AIZL	ADFL	TEM_L1_5_EM_slices15to270 112	55
AIZL	ADFL	TEM_L1_5_EM_slices15to270 113	114
AIZL	ADFL	TEM_L1_5_EM_slices15to270 114	98
AIZL	ADFL	TEM_L1_5_EM_slices15to270 115	111
AIZL	ADFL	TEM_L1_5_EM_slices15to270 115	96
AIZL	ADFL	TEM_L1_5_EM_slices15to270 115	93
AIZL	ADFL	TEM_L1_5_EM_slices15to270 115	152
AIZL	ADFL	TEM_L1_5_EM_slices15to270 116	281
AIZL	ADFL	TEM_L1_5_EM_slices15to270 116	134
AIZL	ADFL	TEM_L1_5_EM_slices15to270 116	326
AIZL	ADFL	TEM_L1_5_EM_slices15to270 117	154
AIZL	ADFL	TEM_L1_5_EM_slices15to270 117	140
AIZL	ADFL	TEM_L1_5_EM_slices15to270 117	178
AIZL	ADFL	TEM_L1_5_EM_slices15to270 117	103
AIZL	ADFL	TEM_L1_5_EM_slices15to270 117	188
AIZL	ADFL	TEM_L1_5_EM_slices15to270 118	149
AIZL	ADFL	TEM_L1_5_EM_slices15to270 118	338
AIZL	ADFL	TEM_L1_5_EM_slices15to270 118	100
AIZL	ADFL	TEM_L1_5_EM_slices15to270 118	109
AIZL	ADFL	TEM_L1_5_EM_slices15to270 119	248
AIZL	ADFL	TEM_L1_5_EM_slices15to270 119	110
AIZL	ADFL	TEM_L1_5_EM_slices15to270 119	374
AIZL	ADFL	TEM_L1_5_EM_slices15to270 120	90
AIZL	ADFL	TEM_L1_5_EM_slices15to270 120	234
AIZL	ADFL	TEM_L1_5_EM_slices15to270 120	500
AIZL	ADFL	TEM_L1_5_EM_slices15to270 121	102
AIZL	ADFL	TEM_L1_5_EM_slices15to270 121	308
AIZL	ADFL	TEM_L1_5_EM_slices15to270 122	131
AIZL	ADFL	TEM_L1_5_EM_slices15to270 122	129
AIZL	ADFL	TEM_L1_5_EM_slices15to270 123	138
AIZL	ADFL	TEM_L1_5_EM_slices15to270 124	183
AIZL	ADFL	TEM_L1_5_EM_slices15to270 125	137
AIZL	ADFL	TEM_L1_5_EM_slices15to270 126	87
AIZL	ADFL	TEM_L1_5_EM_slices15to270 127	165
AIZL	ADFL	TEM_L1_5_EM_slices15to270 128	162
AIZL	ADFL	TEM_L1_5_EM_slices15to270 128	175
AIZL	ADFL	TEM_L1_5_EM_slices15to270 129	187
AIZL	ADFL	TEM_L1_5_EM_slices15to270 130	195
AIZL	ADFL	TEM_L1_5_EM_slices15to270 131	70
AIZL	ADFL	TEM_L1_5_EM_slices15to270 132	31
AIZL	ADFL	TEM_L1_5_EM_slices15to270 135	132
AIZL	ADFL	TEM_L1_5_EM_slices15to270 136	182
AIZL	ADFL	TEM_L1_5_EM_slices15to270 137	176
AIZL	ADFL	TEM_L1_5_EM_slices15to270 138	174
AIZL	ADFL	TEM_L1_5_EM_slices15to270 139	99
AIZL	ADFL	TEM_L1_5_EM_slices15to270 140	142
AIZL	ADFL	TEM_L1_5_EM_slices15to270 141	121
AIZL	ADFL	TEM_L1_5_EM_slices15to270 142	87
AIZL	ADFL	TEM_L1_5_EM_slices15to270 143	36
AIZL	ADFL	TEM_L1_5_EM_slices15to270 153	20
AIZL	ADFL	TEM_L1_5_EM_slices15to270 154	85
AIZL	ADFL	TEM_L1_5_EM_slices15to270 155	93
AIZL	ADFL	TEM_L1_5_EM_slices15to270 156	136
AIZL	ADFL	TEM_L1_5_EM_slices15to270 157	123
AIZL	ADFL	TEM_L1_5_EM_slices15to270 158	166
AIZL	ADFL	TEM_L1_5_EM_slices15to270 159	152
AIZL	ADFL	TEM_L1_5_EM_slices15to270 160	175
AIZL	ADFL	TEM_L1_5_EM_slices15to270 161	203
AIZL	ADFL	TEM_L1_5_EM_slices15to270 162	222
AIZL	ADFL	TEM_L1_5_EM_slices15to270 163	239
AIZL	ADFL	TEM_L1_5_EM_slices15to270 164	297
AIZL	ADFL	TEM_L1_5_EM_slices15to270 166	304
AIZL	ADFL	TEM_L1_5_EM_slices15to270 167	269
AIZL	ADFL	TEM_L1_5_EM_slices15to270 168	125
AIZL	ADFL	TEM_L1_5_EM_slices15to270 169	117
AIZL	ADFL	TEM_L1_5_EM_slices15to270 170	89
AIZL	ADFL	TEM_L1_5_EM_slices15to270 171	136
AIZL	ADFL	TEM_L1_5_EM_slices15to270 172	77
AIZL	ADFL	TEM_L1_5_EM_slices15to270 173	75
AIZL	ADFL	TEM_L1_5_EM_slices15to270 174	81
AIZL	ADFL	TEM_L1_5_EM_slices15to270 175	64
AIZL	ADFL	TEM_L1_5_EM_slices15to270 176	65
AIZL	ADFL	TEM_L1_5_EM_slices15to270 177	121
AIZL	ADFL	TEM_L1_5_EM_slices15to270 178	105
AIZL	ADFL	TEM_L1_5_EM_slices15to270 179	101
AIZL	ADFL	TEM_L1_5_EM_slices15to270 180	78
AIZL	ADFL	TEM_L1_5_EM_slices15to270 182	70
AIZL	ADFL	TEM_L1_5_EM_slices15to270 183	78
AIZL	ADFL	TEM_L1_5_EM_slices15to270 184	79
AIZL	ADFL	TEM_L1_5_EM_slices15to270 187	126
AIZL	ADFL	TEM_L1_5_EM_slices15to270 188	76
AIZL	ADFL	TEM_L1_5_EM_slices15to270 189	69
AIZL	ADFL	TEM_L1_5_EM_slices15to270 190	63
AIZL	ADFL	TEM_L1_5_EM_slices15to270 191	69
AIZL	ADFL	TEM_L1_5_EM_slices15to270 193	61
AIZR	ADFL	TEM_L1_5_EM_slices15to270 91	44
ASEL	ADFL	TEM_L1_5_EM_slices15to270 102	60
ASEL	ADFL	TEM_L1_5_EM_slices15to270 103	162
ASEL	ADFL	TEM_L1_5_EM_slices15to270 104	193
ASEL	ADFL	TEM_L1_5_EM_slices15to270 105	176
ASEL	ADFL	TEM_L1_5_EM_slices15to270 106	201
ASEL	ADFL	TEM_L1_5_EM_slices15to270 107	132
ASEL	ADFL	TEM_L1_5_EM_slices15to270 115	44
ASEL	ADFL	TEM_L1_5_EM_slices15to270 116	41
ASEL	ADFL	TEM_L1_5_EM_slices15to270 117	68
ASEL	ADFL	TEM_L1_5_EM_slices15to270 118	74
ASEL	ADFL	TEM_L1_5_EM_slices15to270 119	318
ASEL	ADFL	TEM_L1_5_EM_slices15to270 119	198
ASER	ADFL	TEM_L1_5_EM_slices15to270 105	130
ASHL	ADFL	TEM_L1_5_EM_slices15to270 94	154
ASHL	ADFL	TEM_L1_5_EM_slices15to270 95	135
ASHL	ADFL	TEM_L1_5_EM_slices15to270 96	129
ASHL	ADFL	TEM_L1_5_EM_slices15to270 97	95
ASHL	ADFL	TEM_L1_5_EM_slices15to270 98	95
ASHL	ADFL	TEM_L1_5_EM_slices15to270 113	82
ASHL	ADFL	TEM_L1_5_EM_slices15to270 113	218
ASHL	ADFL	TEM_L1_5_EM_slices15to270 114	303
ASHL	ADFL	TEM_L1_5_EM_slices15to270 115	90
ASHL	ADFL	TEM_L1_5_EM_slices15to270 115	136
ASHL	ADFL	TEM_L1_5_EM_slices15to270 115	80
ASHL	ADFL	TEM_L1_5_EM_slices15to270 116	181
ASHL	ADFL	TEM_L1_5_EM_slices15to270 116	60
ASHL	ADFL	TEM_L1_5_EM_slices15to270 117	194
ASHL	ADFL	TEM_L1_5_EM_slices15to270 118	190
ASHL	ADFL	TEM_L1_5_EM_slices15to270 119	126
ASHL	ADFL	TEM_L1_5_EM_slices15to270 157	34
ASHL	ADFL	TEM_L1_5_EM_slices15to270 158	16
ASHL	ADFL	TEM_L1_5_EM_slices15to270 159	67
ASHL	ADFL	TEM_L1_5_EM_slices15to270 160	30
ASHL	ADFL	TEM_L1_5_EM_slices15to270 161	72
ASHL	ADFL	TEM_L1_5_EM_slices15to270 162	72
ASHL	ADFL	TEM_L1_5_EM_slices15to270 163	112
ASHL	ADFL	TEM_L1_5_EM_slices15to270 164	136
ASHL	ADFL	TEM_L1_5_EM_slices15to270 165	141
ASHL	ADFL	TEM_L1_5_EM_slices15to270 166	130
ASHL	ADFL	TEM_L1_5_EM_slices15to270 167	125
ASHL	ADFL	TEM_L1_5_EM_slices15to270 168	137
ASHL	ADFL	TEM_L1_5_EM_slices15to270 169	152
ASHL	ADFL	TEM_L1_5_EM_slices15to270 170	110
ASHL	ADFL	TEM_L1_5_EM_slices15to270 171	130
ASHL	ADFL	TEM_L1_5_EM_slices15to270 172	38
ASHL	ADFL	TEM_L1_5_EM_slices15to270 173	76
ASHL	ADFL	TEM_L1_5_EM_slices15to270 174	78
ASHL	ADFL	TEM_L1_5_EM_slices15to270 175	86
ASHL	ADFL	TEM_L1_5_EM_slices15to270 176	79
ASHL	ADFL	TEM_L1_5_EM_slices15to270 178	83
ASHL	ADFL	TEM_L1_5_EM_slices15to270 179	74
ASHL	ADFL	TEM_L1_5_EM_slices15to270 180	67
ASHL	ADFL	TEM_L1_5_EM_slices15to270 182	59
ASHL	ADFL	TEM_L1_5_EM_slices15to270 183	56
ASHL	ADFL	TEM_L1_5_EM_slices15to270 184	63
ASHL	ADFL	TEM_L1_5_EM_slices15to270 187	81
ASHL	ADFL	TEM_L1_5_EM_slices15to270 188	62
ASHL	ADFL	TEM_L1_5_EM_slices15to270 189	79
ASHL	ADFL	TEM_L1_5_EM_slices15to270 190	60
ASHL	ADFL	TEM_L1_5_EM_slices15to270 191	55
ASHL	ADFL	TEM_L1_5_EM_slices15to270 193	52
AUAL	ADFL	TEM_L1_5_EM_slices15to270 88	120
AUAL	ADFL	TEM_L1_5_EM_slices15to270 89	140
AUAL	ADFL	TEM_L1_5_EM_slices15to270 90	145
AUAL	ADFL	TEM_L1_5_EM_slices15to270 90	148
AUAL	ADFL	TEM_L1_5_EM_slices15to270 91	146
AUAL	ADFL	TEM_L1_5_EM_slices15to270 91	240
AUAL	ADFL	TEM_L1_5_EM_slices15to270 94	180
AUAL	ADFL	TEM_L1_5_EM_slices15to270 94	116
AUAL	ADFL	TEM_L1_5_EM_slices15to270 95	120
AUAL	ADFL	TEM_L1_5_EM_slices15to270 96	134
AUAL	ADFL	TEM_L1_5_EM_slices15to270 97	156
AUAL	ADFL	TEM_L1_5_EM_slices15to270 97	103
AUAL	ADFL	TEM_L1_5_EM_slices15to270 98	371
AUAL	ADFL	TEM_L1_5_EM_slices15to270 99	322
AUAL	ADFL	TEM_L1_5_EM_slices15to270 100	263
AUAL	ADFL	TEM_L1_5_EM_slices15to270 101	101
AUAL	ADFL	TEM_L1_5_EM_slices15to270 113	30
AUAL	ADFL	TEM_L1_5_EM_slices15to270 114	505
AUAL	ADFL	TEM_L1_5_EM_slices15to270 115	481
AUAL	ADFL	TEM_L1_5_EM_slices15to270 116	415
AUAL	ADFL	TEM_L1_5_EM_slices15to270 120	149
AUAL	ADFL	TEM_L1_5_EM_slices15to270 121	330
AUAL	ADFL	TEM_L1_5_EM_slices15to270 122	297
AUAL	ADFL	TEM_L1_5_EM_slices15to270 123	246
AUAL	ADFL	TEM_L1_5_EM_slices15to270 124	198
AUAL	ADFL	TEM_L1_5_EM_slices15to270 125	87
AUAL	ADFL	TEM_L1_5_EM_slices15to270 134	11
AUAL	ADFL	TEM_L1_5_EM_slices15to270 135	113
AUAL	ADFL	TEM_L1_5_EM_slices15to270 136	153
AUAL	ADFL	TEM_L1_5_EM_slices15to270 137	123
AUAL	ADFL	TEM_L1_5_EM_slices15to270 138	119
AUAL	ADFL	TEM_L1_5_EM_slices15to270 140	109
AUAL	ADFL	TEM_L1_5_EM_slices15to270 141	122
AUAL	ADFL	TEM_L1_5_EM_slices15to270 142	117
AUAL	ADFL	TEM_L1_5_EM_slices15to270 143	124
AUAL	ADFL	TEM_L1_5_EM_slices15to270 144	134
AUAL	ADFL	TEM_L1_5_EM_slices15to270 145	122
AUAL	ADFL	TEM_L1_5_EM_slices15to270 146	100
AUAL	ADFL	TEM_L1_5_EM_slices15to270 147	142
AUAR	ADFL	TEM_L1_5_EM_slices15to270 88	130
AUAR	ADFL	TEM_L1_5_EM_slices15to270 89	155
AUAR	ADFL	TEM_L1_5_EM_slices15to270 90	157
AUAR	ADFL	TEM_L1_5_EM_slices15to270 91	117
AUAR	ADFL	TEM_L1_5_EM_slices15to270 91	170
AVBL	ADFL	TEM_L1_5_EM_slices15to270 95	50
AVBL	ADFL	TEM_L1_5_EM_slices15to270 96	26
AVBL	ADFL	TEM_L1_5_EM_slices15to270 98	12
AVHR	ADFL	TEM_L1_5_EM_slices15to270 100	47
AVHR	ADFL	TEM_L1_5_EM_slices15to270 101	156
AVHR	ADFL	TEM_L1_5_EM_slices15to270 102	232
AVHR	ADFL	TEM_L1_5_EM_slices15to270 102	187
AVHR	ADFL	TEM_L1_5_EM_slices15to270 103	297
AVHR	ADFL	TEM_L1_5_EM_slices15to270 103	282
AVHR	ADFL	TEM_L1_5_EM_slices15to270 104	300
AVHR	ADFL	TEM_L1_5_EM_slices15to270 104	273
AVHR	ADFL	TEM_L1_5_EM_slices15to270 105	120
AVHR	ADFL	TEM_L1_5_EM_slices15to270 105	174
AVHR	ADFL	TEM_L1_5_EM_slices15to270 105	106
AVHR	ADFL	TEM_L1_5_EM_slices15to270 111	44
AVHR	ADFL	TEM_L1_5_EM_slices15to270 112	81
AVHR	ADFL	TEM_L1_5_EM_slices15to270 113	271
AVHR	ADFL	TEM_L1_5_EM_slices15to270 113	231
AVHR	ADFL	TEM_L1_5_EM_slices15to270 114	429
AVHR	ADFL	TEM_L1_5_EM_slices15to270 115	315
AVHR	ADFL	TEM_L1_5_EM_slices15to270 116	341
AVHR	ADFL	TEM_L1_5_EM_slices15to270 117	56
AVHR	ADFL	TEM_L1_5_EM_slices15to270 117	125
AVHR	ADFL	TEM_L1_5_EM_slices15to270 118	72
AVHR	ADFL	TEM_L1_5_EM_slices15to270 120	88
AVHR	ADFL	TEM_L1_5_EM_slices15to270 121	192
AVHR	ADFL	TEM_L1_5_EM_slices15to270 122	238
AVHR	ADFL	TEM_L1_5_EM_slices15to270 123	229
AVHR	ADFL	TEM_L1_5_EM_slices15to270 124	254
AVHR	ADFL	TEM_L1_5_EM_slices15to270 125	225
AVHR	ADFL	TEM_L1_5_EM_slices15to270 126	198
AVHR	ADFL	TEM_L1_5_EM_slices15to270 127	217
AVHR	ADFL	TEM_L1_5_EM_slices15to270 128	178
AVHR	ADFL	TEM_L1_5_EM_slices15to270 130	114
AVHR	ADFL	TEM_L1_5_EM_slices15to270 131	214
AVHR	ADFL	TEM_L1_5_EM_slices15to270 132	313
AVHR	ADFL	TEM_L1_5_EM_slices15to270 133	354
AVHR	ADFL	TEM_L1_5_EM_slices15to270 134	541
AVHR	ADFL	TEM_L1_5_EM_slices15to270 135	226
AVHR	ADFL	TEM_L1_5_EM_slices15to270 136	242
AVHR	ADFL	TEM_L1_5_EM_slices15to270 137	187
AVHR	ADFL	TEM_L1_5_EM_slices15to270 138	174
AVHR	ADFL	TEM_L1_5_EM_slices15to270 139	150
AVHR	ADFL	TEM_L1_5_EM_slices15to270 140	106
AVHR	ADFL	TEM_L1_5_EM_slices15to270 141	115
AVHR	ADFL	TEM_L1_5_EM_slices15to270 142	73
AVHR	ADFL	TEM_L1_5_EM_slices15to270 143	83
AVHR	ADFL	TEM_L1_5_EM_slices15to270 144	78
AVHR	ADFL	TEM_L1_5_EM_slices15to270 145	88
AVHR	ADFL	TEM_L1_5_EM_slices15to270 145	116
AVHR	ADFL	TEM_L1_5_EM_slices15to270 145	84
AVHR	ADFL	TEM_L1_5_EM_slices15to270 146	219
AVHR	ADFL	TEM_L1_5_EM_slices15to270 146	105
AVHR	ADFL	TEM_L1_5_EM_slices15to270 147	154
AVHR	ADFL	TEM_L1_5_EM_slices15to270 148	69
AVHR	ADFL	TEM_L1_5_EM_slices15to270 149	56
AVHR	ADFL	TEM_L1_5_EM_slices15to270 151	89
AVHR	ADFL	TEM_L1_5_EM_slices15to270 152	49
AVHR	ADFL	TEM_L1_5_EM_slices15to270 153	20
AWAL	ADFL	TEM_L1_5_EM_slices15to270 105	68
AWAL	ADFL	TEM_L1_5_EM_slices15to270 106	140
AWAL	ADFL	TEM_L1_5_EM_slices15to270 112	23
AWAL	ADFL	TEM_L1_5_EM_slices15to270 115	53
AWAL	ADFL	TEM_L1_5_EM_slices15to270 116	41
AWAL	ADFL	TEM_L1_5_EM_slices15to270 147	104
AWAL	ADFL	TEM_L1_5_EM_slices15to270 148	141
AWAL	ADFL	TEM_L1_5_EM_slices15to270 149	149
AWAL	ADFL	TEM_L1_5_EM_slices15to270 150	173
AWAL	ADFL	TEM_L1_5_EM_slices15to270 151	108
AWAL	ADFL	TEM_L1_5_EM_slices15to270 152	86
AWAL	ADFL	TEM_L1_5_EM_slices15to270 153	66
AWAL	ADFL	TEM_L1_5_EM_slices15to270 154	42
AWAL	ADFL	TEM_L1_5_EM_slices15to270 155	28
AWAL	ADFL	TEM_L1_5_EM_slices15to270 157	28
AWAL	ADFL	TEM_L1_5_EM_slices15to270 158	48
AWAL	ADFL	TEM_L1_5_EM_slices15to270 159	102
AWAL	ADFL	TEM_L1_5_EM_slices15to270 160	106
AWAL	ADFL	TEM_L1_5_EM_slices15to270 161	130
AWAL	ADFL	TEM_L1_5_EM_slices15to270 162	152
AWAL	ADFL	TEM_L1_5_EM_slices15to270 163	206
AWAL	ADFL	TEM_L1_5_EM_slices15to270 164	239
AWAL	ADFL	TEM_L1_5_EM_slices15to270 165	208
AWAL	ADFL	TEM_L1_5_EM_slices15to270 166	243
AWAL	ADFL	TEM_L1_5_EM_slices15to270 167	281
AWAL	ADFL	TEM_L1_5_EM_slices15to270 168	241
AWAL	ADFL	TEM_L1_5_EM_slices15to270 169	226
AWAL	ADFL	TEM_L1_5_EM_slices15to270 170	218
AWAL	ADFL	TEM_L1_5_EM_slices15to270 171	184
AWAL	ADFL	TEM_L1_5_EM_slices15to270 172	179
AWAL	ADFL	TEM_L1_5_EM_slices15to270 173	157
AWAL	ADFL	TEM_L1_5_EM_slices15to270 174	148
AWAL	ADFL	TEM_L1_5_EM_slices15to270 175	101
AWAL	ADFL	TEM_L1_5_EM_slices15to270 176	111
AWAL	ADFL	TEM_L1_5_EM_slices15to270 177	143
AWAL	ADFL	TEM_L1_5_EM_slices15to270 178	79
AWAL	ADFL	TEM_L1_5_EM_slices15to270 179	92
AWAL	ADFL	TEM_L1_5_EM_slices15to270 182	83
AWAL	ADFL	TEM_L1_5_EM_slices15to270 183	107
AWAL	ADFL	TEM_L1_5_EM_slices15to270 184	93
AWAL	ADFL	TEM_L1_5_EM_slices15to270 187	123
AWAL	ADFL	TEM_L1_5_EM_slices15to270 188	85
AWAL	ADFL	TEM_L1_5_EM_slices15to270 189	93
AWAL	ADFL	TEM_L1_5_EM_slices15to270 190	87
AWAL	ADFL	TEM_L1_5_EM_slices15to270 191	84
AWAL	ADFL	TEM_L1_5_EM_slices15to270 193	103
AWBL	ADFL	TEM_L1_5_EM_slices15to270 97	54
AWBL	ADFL	TEM_L1_5_EM_slices15to270 98	155
AWBL	ADFL	TEM_L1_5_EM_slices15to270 99	121
AWBL	ADFL	TEM_L1_5_EM_slices15to270 100	147
AWBL	ADFL	TEM_L1_5_EM_slices15to270 101	160
AWBL	ADFL	TEM_L1_5_EM_slices15to270 102	122
AWBL	ADFL	TEM_L1_5_EM_slices15to270 103	70
AWBL	ADFL	TEM_L1_5_EM_slices15to270 104	104
AWBL	ADFL	TEM_L1_5_EM_slices15to270 105	475
AWBL	ADFL	TEM_L1_5_EM_slices15to270 106	66
AWBL	ADFL	TEM_L1_5_EM_slices15to270 106	144
AWBL	ADFL	TEM_L1_5_EM_slices15to270 106	212
AWBL	ADFL	TEM_L1_5_EM_slices15to270 107	130
AWBL	ADFL	TEM_L1_5_EM_slices15to270 107	143
AWBL	ADFL	TEM_L1_5_EM_slices15to270 111	84
AWBL	ADFL	TEM_L1_5_EM_slices15to270 112	75
AWBL	ADFL	TEM_L1_5_EM_slices15to270 113	90
AWBL	ADFL	TEM_L1_5_EM_slices15to270 114	339
AWBL	ADFL	TEM_L1_5_EM_slices15to270 115	352
AWBL	ADFL	TEM_L1_5_EM_slices15to270 116	229
AWBL	ADFL	TEM_L1_5_EM_slices15to270 117	156
AWBL	ADFL	TEM_L1_5_EM_slices15to270 118	56
AWBL	ADFL	TEM_L1_5_EM_slices15to270 118	290
AWBL	ADFL	TEM_L1_5_EM_slices15to270 118	56
AWBL	ADFL	TEM_L1_5_EM_slices15to270 119	69
AWBL	ADFL	TEM_L1_5_EM_slices15to270 119	261
AWBL	ADFL	TEM_L1_5_EM_slices15to270 120	381
AWBL	ADFL	TEM_L1_5_EM_slices15to270 121	120
AWBL	ADFL	TEM_L1_5_EM_slices15to270 133	45
AWBL	ADFL	TEM_L1_5_EM_slices15to270 134	117
AWBL	ADFL	TEM_L1_5_EM_slices15to270 135	47
AWBL	ADFL	TEM_L1_5_EM_slices15to270 136	18
AWBL	ADFL	TEM_L1_5_EM_slices15to270 137	85
AWBL	ADFL	TEM_L1_5_EM_slices15to270 138	70
AWBL	ADFL	TEM_L1_5_EM_slices15to270 139	109
AWBL	ADFL	TEM_L1_5_EM_slices15to270 140	103
AWBL	ADFL	TEM_L1_5_EM_slices15to270 141	120
AWBL	ADFL	TEM_L1_5_EM_slices15to270 142	86
AWBL	ADFL	TEM_L1_5_EM_slices15to270 143	127
AWBL	ADFL	TEM_L1_5_EM_slices15to270 144	129
AWBL	ADFL	TEM_L1_5_EM_slices15to270 145	134
AWBL	ADFL	TEM_L1_5_EM_slices15to270 146	96
AWBL	ADFL	TEM_L1_5_EM_slices15to270 147	71
AWBL	ADFL	TEM_L1_5_EM_slices15to270 148	89
AWBL	ADFL	TEM_L1_5_EM_slices15to270 149	86
AWBL	ADFL	TEM_L1_5_EM_slices15to270 150	125
AWBL	ADFL	TEM_L1_5_EM_slices15to270 151	165
AWBL	ADFL	TEM_L1_5_EM_slices15to270 152	161
AWBL	ADFL	TEM_L1_5_EM_slices15to270 153	188
AWBL	ADFL	TEM_L1_5_EM_slices15to270 154	217
AWBL	ADFL	TEM_L1_5_EM_slices15to270 155	211
AWBL	ADFL	TEM_L1_5_EM_slices15to270 156	206
AWBL	ADFL	TEM_L1_5_EM_slices15to270 157	194
AWBL	ADFL	TEM_L1_5_EM_slices15to270 158	206
AWBL	ADFL	TEM_L1_5_EM_slices15to270 159	200
AWBL	ADFL	TEM_L1_5_EM_slices15to270 160	248
AWBL	ADFL	TEM_L1_5_EM_slices15to270 161	211
AWBL	ADFL	TEM_L1_5_EM_slices15to270 162	189
AWBL	ADFL	TEM_L1_5_EM_slices15to270 163	169
AWBL	ADFL	TEM_L1_5_EM_slices15to270 164	143
AWBL	ADFL	TEM_L1_5_EM_slices15to270 166	47
AWBL	ADFL	TEM_L1_5_EM_slices15to270 177	26
AWBL	ADFL	TEM_L1_5_EM_slices15to270 178	54
AWBL	ADFL	TEM_L1_5_EM_slices15to270 179	69
AWBL	ADFL	TEM_L1_5_EM_slices15to270 180	84
AWBL	ADFL	TEM_L1_5_EM_slices15to270 182	56
AWBL	ADFL	TEM_L1_5_EM_slices15to270 183	57
AWBL	ADFL	TEM_L1_5_EM_slices15to270 187	45
AWBL	ADFL	TEM_L1_5_EM_slices15to270 188	52
AWBL	ADFL	TEM_L1_5_EM_slices15to270 189	61
AWBL	ADFL	TEM_L1_5_EM_slices15to270 190	58
AWBL	ADFL	TEM_L1_5_EM_slices15to270 191	68
AWBL	ADFL	TEM_L1_5_EM_slices15to270 193	45
AWBR	ADFL	TEM_L1_5_EM_slices15to270 96	282
AWBR	ADFL	TEM_L1_5_EM_slices15to270 97	101
AWBR	ADFL	TEM_L1_5_EM_slices15to270 98	174
AWCR	ADFL	TEM_L1_5_EM_slices15to270 117	69
AWCR	ADFL	TEM_L1_5_EM_slices15to270 118	65
AWCR	ADFL	TEM_L1_5_EM_slices15to270 123	158
AWCR	ADFL	TEM_L1_5_EM_slices15to270 124	124
AWCR	ADFL	TEM_L1_5_EM_slices15to270 125	64
OLQVL	ADFL	TEM_L1_5_EM_slices15to270 116	103
RIAL	ADFL	TEM_L1_5_EM_slices15to270 135	40
RIAL	ADFL	TEM_L1_5_EM_slices15to270 136	111
RIAL	ADFL	TEM_L1_5_EM_slices15to270 137	24
RIAL	ADFL	TEM_L1_5_EM_slices15to270 137	92
RIAL	ADFL	TEM_L1_5_EM_slices15to270 138	173
RIAL	ADFL	TEM_L1_5_EM_slices15to270 140	142
RIAL	ADFL	TEM_L1_5_EM_slices15to270 141	133
RIAL	ADFL	TEM_L1_5_EM_slices15to270 142	166
RIAL	ADFL	TEM_L1_5_EM_slices15to270 143	156
RIAL	ADFL	TEM_L1_5_EM_slices15to270 144	203
RIAL	ADFL	TEM_L1_5_EM_slices15to270 145	209
RIAL	ADFL	TEM_L1_5_EM_slices15to270 146	246
RIAL	ADFL	TEM_L1_5_EM_slices15to270 147	301
RIAL	ADFL	TEM_L1_5_EM_slices15to270 148	259
RIAL	ADFL	TEM_L1_5_EM_slices15to270 149	215
RIAL	ADFL	TEM_L1_5_EM_slices15to270 150	182
RIAL	ADFL	TEM_L1_5_EM_slices15to270 151	178
RIAL	ADFL	TEM_L1_5_EM_slices15to270 152	272
RIAL	ADFL	TEM_L1_5_EM_slices15to270 153	239
RIAL	ADFL	TEM_L1_5_EM_slices15to270 154	106
RIAL	ADFL	TEM_L1_5_EM_slices15to270 155	66
RIAL	ADFL	TEM_L1_5_EM_slices15to270 172	82
RIAL	ADFL	TEM_L1_5_EM_slices15to270 173	109
RIAL	ADFL	TEM_L1_5_EM_slices15to270 174	87
RIAL	ADFL	TEM_L1_5_EM_slices15to270 175	74
RIAL	ADFL	TEM_L1_5_EM_slices15to270 176	62
RIAL	ADFL	TEM_L1_5_EM_slices15to270 177	33
RIBL	ADFL	TEM_L1_5_EM_slices15to270 187	6
RIBL	ADFL	TEM_L1_5_EM_slices15to270 188	44
RIBL	ADFL	TEM_L1_5_EM_slices15to270 189	36
RIBL	ADFL	TEM_L1_5_EM_slices15to270 190	48
RIBL	ADFL	TEM_L1_5_EM_slices15to270 191	56
RIBL	ADFL	TEM_L1_5_EM_slices15to270 193	70
RIH	ADFL	TEM_L1_5_EM_slices15to270 133	150
RIH	ADFL	TEM_L1_5_EM_slices15to270 134	266
RIH	ADFL	TEM_L1_5_EM_slices15to270 135	215
RIH	ADFL	TEM_L1_5_EM_slices15to270 136	133
RIR	ADFL	TEM_L1_5_EM_slices15to270 88	40
RIR	ADFL	TEM_L1_5_EM_slices15to270 89	81
RIR	ADFL	TEM_L1_5_EM_slices15to270 90	22
RIR	ADFL	TEM_L1_5_EM_slices15to270 91	90
RIR	ADFL	TEM_L1_5_EM_slices15to270 92	125
RIR	ADFL	TEM_L1_5_EM_slices15to270 93	94
RIR	ADFL	TEM_L1_5_EM_slices15to270 94	115
RIR	ADFL	TEM_L1_5_EM_slices15to270 94	247
RIR	ADFL	TEM_L1_5_EM_slices15to270 95	152
RIR	ADFL	TEM_L1_5_EM_slices15to270 95	270
RIR	ADFL	TEM_L1_5_EM_slices15to270 96	124
RIR	ADFL	TEM_L1_5_EM_slices15to270 96	50
RIR	ADFL	TEM_L1_5_EM_slices15to270 96	425
RIR	ADFL	TEM_L1_5_EM_slices15to270 97	479
RIR	ADFL	TEM_L1_5_EM_slices15to270 97	90
RIR	ADFL	TEM_L1_5_EM_slices15to270 98	47
RIR	ADFL	TEM_L1_5_EM_slices15to270 98	517
RIR	ADFL	TEM_L1_5_EM_slices15to270 99	560
RIR	ADFL	TEM_L1_5_EM_slices15to270 100	489
RIR	ADFL	TEM_L1_5_EM_slices15to270 100	66
RIR	ADFL	TEM_L1_5_EM_slices15to270 101	421
RIR	ADFL	TEM_L1_5_EM_slices15to270 101	307
RIR	ADFL	TEM_L1_5_EM_slices15to270 102	200
RIR	ADFL	TEM_L1_5_EM_slices15to270 102	150
RIR	ADFL	TEM_L1_5_EM_slices15to270 103	97
RIR	ADFL	TEM_L1_5_EM_slices15to270 104	28
RIR	ADFL	TEM_L1_5_EM_slices15to270 105	15
RIR	ADFL	TEM_L1_5_EM_slices15to270 111	120
RIR	ADFL	TEM_L1_5_EM_slices15to270 112	185
RIR	ADFL	TEM_L1_5_EM_slices15to270 112	62
RIR	ADFL	TEM_L1_5_EM_slices15to270 113	295
RIR	ADFL	TEM_L1_5_EM_slices15to270 113	105
RIR	ADFL	TEM_L1_5_EM_slices15to270 113	236
RIR	ADFL	TEM_L1_5_EM_slices15to270 119	69
RIR	ADFL	TEM_L1_5_EM_slices15to270 120	150
RIR	ADFL	TEM_L1_5_EM_slices15to270 121	240
RIR	ADFL	TEM_L1_5_EM_slices15to270 122	225
RIR	ADFL	TEM_L1_5_EM_slices15to270 123	192
RIR	ADFL	TEM_L1_5_EM_slices15to270 124	203
RIR	ADFL	TEM_L1_5_EM_slices15to270 125	224
RIR	ADFL	TEM_L1_5_EM_slices15to270 126	243
RIR	ADFL	TEM_L1_5_EM_slices15to270 127	435
RIR	ADFL	TEM_L1_5_EM_slices15to270 128	77
RIR	ADFL	TEM_L1_5_EM_slices15to270 129	60
RIR	ADFL	TEM_L1_5_EM_slices15to270 130	49
RIR	ADFL	TEM_L1_5_EM_slices15to270 131	51
RIR	ADFL	TEM_L1_5_EM_slices15to270 132	94
RIR	ADFL	TEM_L1_5_EM_slices15to270 133	504
SIAVL	ADFL	TEM_L1_5_EM_slices15to270 149	70
SIAVL	ADFL	TEM_L1_5_EM_slices15to270 150	115
SIAVL	ADFL	TEM_L1_5_EM_slices15to270 151	117
SIAVL	ADFL	TEM_L1_5_EM_slices15to270 152	102
SIAVL	ADFL	TEM_L1_5_EM_slices15to270 153	102
SIAVL	ADFL	TEM_L1_5_EM_slices15to270 154	114
SIAVL	ADFL	TEM_L1_5_EM_slices15to270 155	119
SIAVL	ADFL	TEM_L1_5_EM_slices15to270 156	135
SIAVL	ADFL	TEM_L1_5_EM_slices15to270 157	128
SIAVL	ADFL	TEM_L1_5_EM_slices15to270 158	121
SIAVL	ADFL	TEM_L1_5_EM_slices15to270 159	141
SIAVL	ADFL	TEM_L1_5_EM_slices15to270 160	111
SIAVL	ADFL	TEM_L1_5_EM_slices15to270 161	94
SIAVL	ADFL	TEM_L1_5_EM_slices15to270 162	74
SIAVL	ADFL	TEM_L1_5_EM_slices15to270 163	51
SIAVL	ADFL	TEM_L1_5_EM_slices15to270 164	6
SIBDL	ADFL	TEM_L1_5_EM_slices15to270 160	73
SIBDL	ADFL	TEM_L1_5_EM_slices15to270 161	125
SIBDL	ADFL	TEM_L1_5_EM_slices15to270 162	152
SIBDL	ADFL	TEM_L1_5_EM_slices15to270 163	173
SIBDL	ADFL	TEM_L1_5_EM_slices15to270 164	177
SIBDL	ADFL	TEM_L1_5_EM_slices15to270 165	115
SIBDL	ADFL	TEM_L1_5_EM_slices15to270 166	172
SIBDL	ADFL	TEM_L1_5_EM_slices15to270 167	167
SIBDL	ADFL	TEM_L1_5_EM_slices15to270 168	152
SIBDL	ADFL	TEM_L1_5_EM_slices15to270 169	159
SIBDL	ADFL	TEM_L1_5_EM_slices15to270 170	153
SIBDL	ADFL	TEM_L1_5_EM_slices15to270 171	194
SIBDL	ADFL	TEM_L1_5_EM_slices15to270 172	150
SIBDL	ADFL	TEM_L1_5_EM_slices15to270 173	106
SIBDL	ADFL	TEM_L1_5_EM_slices15to270 174	77
SIBVL	ADFL	TEM_L1_5_EM_slices15to270 166	38
SIBVL	ADFL	TEM_L1_5_EM_slices15to270 167	67
SIBVL	ADFL	TEM_L1_5_EM_slices15to270 168	102
SIBVL	ADFL	TEM_L1_5_EM_slices15to270 169	100
SIBVL	ADFL	TEM_L1_5_EM_slices15to270 170	73
SIBVL	ADFL	TEM_L1_5_EM_slices15to270 171	23
SMBDL	ADFL	TEM_L1_5_EM_slices15to270 145	77
SMBDL	ADFL	TEM_L1_5_EM_slices15to270 146	224
SMBDL	ADFL	TEM_L1_5_EM_slices15to270 147	201
SMBDL	ADFL	TEM_L1_5_EM_slices15to270 148	138
SMBDL	ADFL	TEM_L1_5_EM_slices15to270 149	100
SMBDL	ADFL	TEM_L1_5_EM_slices15to270 150	81
SMBDL	ADFL	TEM_L1_5_EM_slices15to270 151	94
SMBDL	ADFL	TEM_L1_5_EM_slices15to270 152	136
SMBDL	ADFL	TEM_L1_5_EM_slices15to270 153	133
SMBDL	ADFL	TEM_L1_5_EM_slices15to270 154	154
SMBDL	ADFL	TEM_L1_5_EM_slices15to270 159	62
SMBDL	ADFL	TEM_L1_5_EM_slices15to270 160	97
SMBDL	ADFL	TEM_L1_5_EM_slices15to270 161	156
SMBDL	ADFL	TEM_L1_5_EM_slices15to270 162	206
SMBDL	ADFL	TEM_L1_5_EM_slices15to270 163	190
SMBDL	ADFL	TEM_L1_5_EM_slices15to270 164	173
SMBDL	ADFL	TEM_L1_5_EM_slices15to270 166	179
SMBDL	ADFL	TEM_L1_5_EM_slices15to270 167	161
SMBDL	ADFL	TEM_L1_5_EM_slices15to270 168	132
SMBDL	ADFL	TEM_L1_5_EM_slices15to270 169	98
SMBDL	ADFL	TEM_L1_5_EM_slices15to270 170	44
SMBVL	ADFL	TEM_L1_5_EM_slices15to270 139	75
SMBVL	ADFL	TEM_L1_5_EM_slices15to270 140	97
SMBVL	ADFL	TEM_L1_5_EM_slices15to270 141	158
SMBVL	ADFL	TEM_L1_5_EM_slices15to270 142	177
SMBVL	ADFL	TEM_L1_5_EM_slices15to270 143	226
SMBVL	ADFL	TEM_L1_5_EM_slices15to270 144	296
SMBVL	ADFL	TEM_L1_5_EM_slices15to270 145	323
SMBVL	ADFL	TEM_L1_5_EM_slices15to270 146	201
SMBVL	ADFL	TEM_L1_5_EM_slices15to270 147	180
SMBVL	ADFL	TEM_L1_5_EM_slices15to270 148	209
SMBVL	ADFL	TEM_L1_5_EM_slices15to270 149	213
SMBVL	ADFL	TEM_L1_5_EM_slices15to270 150	224
SMBVL	ADFL	TEM_L1_5_EM_slices15to270 151	266
SMBVL	ADFL	TEM_L1_5_EM_slices15to270 152	344
SMBVL	ADFL	TEM_L1_5_EM_slices15to270 153	321
SMBVL	ADFL	TEM_L1_5_EM_slices15to270 154	305
SMBVL	ADFL	TEM_L1_5_EM_slices15to270 155	327
SMBVL	ADFL	TEM_L1_5_EM_slices15to270 156	317
SMBVL	ADFL	TEM_L1_5_EM_slices15to270 157	348
SMBVL	ADFL	TEM_L1_5_EM_slices15to270 158	325
SMBVL	ADFL	TEM_L1_5_EM_slices15to270 159	307
SMBVL	ADFL	TEM_L1_5_EM_slices15to270 160	259
SMBVL	ADFL	TEM_L1_5_EM_slices15to270 161	117
SMBVL	ADFL	TEM_L1_5_EM_slices15to270 168	38
SMBVL	ADFL	TEM_L1_5_EM_slices15to270 169	61
SMBVL	ADFL	TEM_L1_5_EM_slices15to270 170	89
SMBVL	ADFL	TEM_L1_5_EM_slices15to270 171	97
SMBVL	ADFL	TEM_L1_5_EM_slices15to270 172	90
SMBVL	ADFL	TEM_L1_5_EM_slices15to270 173	103
SMBVL	ADFL	TEM_L1_5_EM_slices15to270 174	131
SMBVL	ADFL	TEM_L1_5_EM_slices15to270 175	73
SMBVL	ADFL	TEM_L1_5_EM_slices15to270 176	83
SMBVL	ADFL	TEM_L1_5_EM_slices15to270 177	84
SMBVL	ADFL	TEM_L1_5_EM_slices15to270 178	68
SMBVL	ADFL	TEM_L1_5_EM_slices15to270 179	87
SMBVL	ADFL	TEM_L1_5_EM_slices15to270 180	71
SMBVL	ADFL	TEM_L1_5_EM_slices15to270 182	65
SMBVL	ADFL	TEM_L1_5_EM_slices15to270 183	93
SMBVL	ADFL	TEM_L1_5_EM_slices15to270 184	86
SMBVL	ADFL	TEM_L1_5_EM_slices15to270 187	104
SMBVL	ADFL	TEM_L1_5_EM_slices15to270 188	71
SMBVL	ADFL	TEM_L1_5_EM_slices15to270 189	85
SMBVL	ADFL	TEM_L1_5_EM_slices15to270 190	82
SMBVL	ADFL	TEM_L1_5_EM_slices15to270 191	74
SMBVL	ADFL	TEM_L1_5_EM_slices15to270 193	93
URXL	ADFL	TEM_L1_5_EM_slices15to270 112	386
URXL	ADFL	TEM_L1_5_EM_slices15to270 113	250
URXL	ADFL	TEM_L1_5_EM_slices15to270 113	287
URXL	ADFL	TEM_L1_5_EM_slices15to270 113	155
URXL	ADFL	TEM_L1_5_EM_slices15to270 114	319
URXL	ADFL	TEM_L1_5_EM_slices15to270 114	137
URXL	ADFL	TEM_L1_5_EM_slices15to270 115	276
URXL	ADFL	TEM_L1_5_EM_slices15to270 115	139
URXL	ADFL	TEM_L1_5_EM_slices15to270 116	158
URXL	ADFL	TEM_L1_5_EM_slices15to270 116	474
URXL	ADFL	TEM_L1_5_EM_slices15to270 117	128
URXL	ADFL	TEM_L1_5_EM_slices15to270 117	411
URXL	ADFL	TEM_L1_5_EM_slices15to270 118	119
URXL	ADFL	TEM_L1_5_EM_slices15to270 118	65
URXL	ADFL	TEM_L1_5_EM_slices15to270 119	788
URXL	ADFL	TEM_L1_5_EM_slices15to270 119	134
URXL	ADFL	TEM_L1_5_EM_slices15to270 120	224
URXL	ADFL	TEM_L1_5_EM_slices15to270 121	273
URXL	ADFL	TEM_L1_5_EM_slices15to270 122	148
URXL	ADFL	TEM_L1_5_EM_slices15to270 123	114
URXL	ADFL	TEM_L1_5_EM_slices15to270 124	119
URXL	ADFL	TEM_L1_5_EM_slices15to270 125	120
URXL	ADFL	TEM_L1_5_EM_slices15to270 126	107
URXL	ADFL	TEM_L1_5_EM_slices15to270 127	164
URXL	ADFL	TEM_L1_5_EM_slices15to270 128	160
URXL	ADFL	TEM_L1_5_EM_slices15to270 129	131
URXL	ADFL	TEM_L1_5_EM_slices15to270 130	130
URXL	ADFL	TEM_L1_5_EM_slices15to270 131	158
URXL	ADFL	TEM_L1_5_EM_slices15to270 132	182
URXL	ADFL	TEM_L1_5_EM_slices15to270 133	291
URXL	ADFL	TEM_L1_5_EM_slices15to270 134	300
URXL	ADFL	TEM_L1_5_EM_slices15to270 135	81
URYVL	ADFL	TEM_L1_5_EM_slices15to270 116	38
URYVL	ADFL	TEM_L1_5_EM_slices15to270 117	20
ADAR	ADFR	TEM_L1_5_EM_slices15to270 162	87
AFDR	ADFR	TEM_L1_5_EM_slices15to270 116	90
AFDR	ADFR	TEM_L1_5_EM_slices15to270 117	263
AFDR	ADFR	TEM_L1_5_EM_slices15to270 118	354
AFDR	ADFR	TEM_L1_5_EM_slices15to270 119	509
AFDR	ADFR	TEM_L1_5_EM_slices15to270 120	462
AFDR	ADFR	TEM_L1_5_EM_slices15to270 120	138
AFDR	ADFR	TEM_L1_5_EM_slices15to270 121	304
AFDR	ADFR	TEM_L1_5_EM_slices15to270 122	325
AFDR	ADFR	TEM_L1_5_EM_slices15to270 123	233
AFDR	ADFR	TEM_L1_5_EM_slices15to270 124	230
AFDR	ADFR	TEM_L1_5_EM_slices15to270 125	94
AFDR	ADFR	TEM_L1_5_EM_slices15to270 127	52
AFDR	ADFR	TEM_L1_5_EM_slices15to270 128	99
AFDR	ADFR	TEM_L1_5_EM_slices15to270 129	78
AFDR	ADFR	TEM_L1_5_EM_slices15to270 130	112
AFDR	ADFR	TEM_L1_5_EM_slices15to270 131	174
AFDR	ADFR	TEM_L1_5_EM_slices15to270 132	157
AFDR	ADFR	TEM_L1_5_EM_slices15to270 133	194
AFDR	ADFR	TEM_L1_5_EM_slices15to270 134	129
AFDR	ADFR	TEM_L1_5_EM_slices15to270 135	77
AFDR	ADFR	TEM_L1_5_EM_slices15to270 136	84
AFDR	ADFR	TEM_L1_5_EM_slices15to270 137	111
AFDR	ADFR	TEM_L1_5_EM_slices15to270 138	135
AFDR	ADFR	TEM_L1_5_EM_slices15to270 139	172
AFDR	ADFR	TEM_L1_5_EM_slices15to270 140	225
AFDR	ADFR	TEM_L1_5_EM_slices15to270 141	235
AFDR	ADFR	TEM_L1_5_EM_slices15to270 142	250
AFDR	ADFR	TEM_L1_5_EM_slices15to270 143	295
AFDR	ADFR	TEM_L1_5_EM_slices15to270 144	255
AFDR	ADFR	TEM_L1_5_EM_slices15to270 145	228
AFDR	ADFR	TEM_L1_5_EM_slices15to270 146	194
AFDR	ADFR	TEM_L1_5_EM_slices15to270 147	169
AFDR	ADFR	TEM_L1_5_EM_slices15to270 148	158
AFDR	ADFR	TEM_L1_5_EM_slices15to270 149	119
AFDR	ADFR	TEM_L1_5_EM_slices15to270 150	98
AFDR	ADFR	TEM_L1_5_EM_slices15to270 151	14
AIYR	ADFR	TEM_L1_5_EM_slices15to270 97	403
AIYR	ADFR	TEM_L1_5_EM_slices15to270 98	568
AIYR	ADFR	TEM_L1_5_EM_slices15to270 99	92
AIYR	ADFR	TEM_L1_5_EM_slices15to270 99	350
AIYR	ADFR	TEM_L1_5_EM_slices15to270 99	258
AIYR	ADFR	TEM_L1_5_EM_slices15to270 100	227
AIYR	ADFR	TEM_L1_5_EM_slices15to270 100	203
AIYR	ADFR	TEM_L1_5_EM_slices15to270 100	208
AIYR	ADFR	TEM_L1_5_EM_slices15to270 101	343
AIYR	ADFR	TEM_L1_5_EM_slices15to270 101	106
AIYR	ADFR	TEM_L1_5_EM_slices15to270 102	190
AIYR	ADFR	TEM_L1_5_EM_slices15to270 103	162
AIYR	ADFR	TEM_L1_5_EM_slices15to270 104	160
AIYR	ADFR	TEM_L1_5_EM_slices15to270 105	151
AIYR	ADFR	TEM_L1_5_EM_slices15to270 114	88
AIYR	ADFR	TEM_L1_5_EM_slices15to270 115	92
AIYR	ADFR	TEM_L1_5_EM_slices15to270 116	98
AIYR	ADFR	TEM_L1_5_EM_slices15to270 117	48
AIYR	ADFR	TEM_L1_5_EM_slices15to270 118	44
AIYR	ADFR	TEM_L1_5_EM_slices15to270 119	189
AIYR	ADFR	TEM_L1_5_EM_slices15to270 119	12
AIYR	ADFR	TEM_L1_5_EM_slices15to270 120	137
AIYR	ADFR	TEM_L1_5_EM_slices15to270 120	193
AIYR	ADFR	TEM_L1_5_EM_slices15to270 120	145
AIYR	ADFR	TEM_L1_5_EM_slices15to270 120	50
AIYR	ADFR	TEM_L1_5_EM_slices15to270 121	85
AIYR	ADFR	TEM_L1_5_EM_slices15to270 121	371
AIYR	ADFR	TEM_L1_5_EM_slices15to270 121	212
AIYR	ADFR	TEM_L1_5_EM_slices15to270 122	250
AIYR	ADFR	TEM_L1_5_EM_slices15to270 124	45
AIYR	ADFR	TEM_L1_5_EM_slices15to270 146	129
AIYR	ADFR	TEM_L1_5_EM_slices15to270 147	125
AIYR	ADFR	TEM_L1_5_EM_slices15to270 148	124
AIYR	ADFR	TEM_L1_5_EM_slices15to270 149	151
AIYR	ADFR	TEM_L1_5_EM_slices15to270 150	161
AIYR	ADFR	TEM_L1_5_EM_slices15to270 151	152
AIYR	ADFR	TEM_L1_5_EM_slices15to270 152	170
AIYR	ADFR	TEM_L1_5_EM_slices15to270 153	120
AIYR	ADFR	TEM_L1_5_EM_slices15to270 154	143
AIYR	ADFR	TEM_L1_5_EM_slices15to270 155	131
AIYR	ADFR	TEM_L1_5_EM_slices15to270 156	114
AIYR	ADFR	TEM_L1_5_EM_slices15to270 157	128
AIYR	ADFR	TEM_L1_5_EM_slices15to270 158	92
AIYR	ADFR	TEM_L1_5_EM_slices15to270 159	100
AIYR	ADFR	TEM_L1_5_EM_slices15to270 160	83
AIYR	ADFR	TEM_L1_5_EM_slices15to270 161	51
AIYR	ADFR	TEM_L1_5_EM_slices15to270 162	48
AIYR	ADFR	TEM_L1_5_EM_slices15to270 163	61
AIYR	ADFR	TEM_L1_5_EM_slices15to270 164	73
AIYR	ADFR	TEM_L1_5_EM_slices15to270 165	67
AIYR	ADFR	TEM_L1_5_EM_slices15to270 166	115
AIYR	ADFR	TEM_L1_5_EM_slices15to270 168	43
AIYR	ADFR	TEM_L1_5_EM_slices15to270 169	57
AIYR	ADFR	TEM_L1_5_EM_slices15to270 171	41
AIYR	ADFR	TEM_L1_5_EM_slices15to270 173	38
AIYR	ADFR	TEM_L1_5_EM_slices15to270 174	53
AIYR	ADFR	TEM_L1_5_EM_slices15to270 175	54
AIYR	ADFR	TEM_L1_5_EM_slices15to270 176	64
AIYR	ADFR	TEM_L1_5_EM_slices15to270 177	60
AIYR	ADFR	TEM_L1_5_EM_slices15to270 178	67
AIYR	ADFR	TEM_L1_5_EM_slices15to270 179	57
AIYR	ADFR	TEM_L1_5_EM_slices15to270 180	57
AIYR	ADFR	TEM_L1_5_EM_slices15to270 181	64
AIYR	ADFR	TEM_L1_5_EM_slices15to270 182	71
AIYR	ADFR	TEM_L1_5_EM_slices15to270 183	66
AIYR	ADFR	TEM_L1_5_EM_slices15to270 184	74
AIYR	ADFR	TEM_L1_5_EM_slices15to270 185	36
AIYR	ADFR	TEM_L1_5_EM_slices15to270 186	5
AIZR	ADFR	TEM_L1_5_EM_slices15to270 101	260
AIZR	ADFR	TEM_L1_5_EM_slices15to270 102	26
AIZR	ADFR	TEM_L1_5_EM_slices15to270 102	47
AIZR	ADFR	TEM_L1_5_EM_slices15to270 103	86
AIZR	ADFR	TEM_L1_5_EM_slices15to270 103	46
AIZR	ADFR	TEM_L1_5_EM_slices15to270 104	107
AIZR	ADFR	TEM_L1_5_EM_slices15to270 107	143
AIZR	ADFR	TEM_L1_5_EM_slices15to270 112	103
AIZR	ADFR	TEM_L1_5_EM_slices15to270 113	177
AIZR	ADFR	TEM_L1_5_EM_slices15to270 114	159
AIZR	ADFR	TEM_L1_5_EM_slices15to270 115	181
AIZR	ADFR	TEM_L1_5_EM_slices15to270 117	144
AIZR	ADFR	TEM_L1_5_EM_slices15to270 118	46
AIZR	ADFR	TEM_L1_5_EM_slices15to270 118	117
AIZR	ADFR	TEM_L1_5_EM_slices15to270 119	106
AIZR	ADFR	TEM_L1_5_EM_slices15to270 119	147
AIZR	ADFR	TEM_L1_5_EM_slices15to270 120	332
AIZR	ADFR	TEM_L1_5_EM_slices15to270 120	271
AIZR	ADFR	TEM_L1_5_EM_slices15to270 120	55
AIZR	ADFR	TEM_L1_5_EM_slices15to270 121	153
AIZR	ADFR	TEM_L1_5_EM_slices15to270 121	71
AIZR	ADFR	TEM_L1_5_EM_slices15to270 122	118
AIZR	ADFR	TEM_L1_5_EM_slices15to270 123	235
AIZR	ADFR	TEM_L1_5_EM_slices15to270 123	117
AIZR	ADFR	TEM_L1_5_EM_slices15to270 123	244
AIZR	ADFR	TEM_L1_5_EM_slices15to270 124	208
AIZR	ADFR	TEM_L1_5_EM_slices15to270 125	100
AIZR	ADFR	TEM_L1_5_EM_slices15to270 126	70
AIZR	ADFR	TEM_L1_5_EM_slices15to270 127	62
AIZR	ADFR	TEM_L1_5_EM_slices15to270 128	53
AIZR	ADFR	TEM_L1_5_EM_slices15to270 129	16
AIZR	ADFR	TEM_L1_5_EM_slices15to270 131	50
AIZR	ADFR	TEM_L1_5_EM_slices15to270 132	35
AIZR	ADFR	TEM_L1_5_EM_slices15to270 133	21
AIZR	ADFR	TEM_L1_5_EM_slices15to270 133	43
AIZR	ADFR	TEM_L1_5_EM_slices15to270 134	202
AIZR	ADFR	TEM_L1_5_EM_slices15to270 135	145
AIZR	ADFR	TEM_L1_5_EM_slices15to270 135	141
AIZR	ADFR	TEM_L1_5_EM_slices15to270 136	276
AIZR	ADFR	TEM_L1_5_EM_slices15to270 137	308
AIZR	ADFR	TEM_L1_5_EM_slices15to270 138	317
AIZR	ADFR	TEM_L1_5_EM_slices15to270 139	342
AIZR	ADFR	TEM_L1_5_EM_slices15to270 140	83
AIZR	ADFR	TEM_L1_5_EM_slices15to270 140	243
AIZR	ADFR	TEM_L1_5_EM_slices15to270 141	247
AIZR	ADFR	TEM_L1_5_EM_slices15to270 142	239
AIZR	ADFR	TEM_L1_5_EM_slices15to270 143	203
AIZR	ADFR	TEM_L1_5_EM_slices15to270 144	161
AIZR	ADFR	TEM_L1_5_EM_slices15to270 145	138
AIZR	ADFR	TEM_L1_5_EM_slices15to270 146	163
AIZR	ADFR	TEM_L1_5_EM_slices15to270 147	160
AIZR	ADFR	TEM_L1_5_EM_slices15to270 148	185
AIZR	ADFR	TEM_L1_5_EM_slices15to270 149	245
AIZR	ADFR	TEM_L1_5_EM_slices15to270 150	261
AIZR	ADFR	TEM_L1_5_EM_slices15to270 151	257
AIZR	ADFR	TEM_L1_5_EM_slices15to270 152	248
AIZR	ADFR	TEM_L1_5_EM_slices15to270 153	219
AIZR	ADFR	TEM_L1_5_EM_slices15to270 154	205
AIZR	ADFR	TEM_L1_5_EM_slices15to270 155	178
AIZR	ADFR	TEM_L1_5_EM_slices15to270 156	188
AIZR	ADFR	TEM_L1_5_EM_slices15to270 157	125
AIZR	ADFR	TEM_L1_5_EM_slices15to270 158	103
AIZR	ADFR	TEM_L1_5_EM_slices15to270 159	125
AIZR	ADFR	TEM_L1_5_EM_slices15to270 160	126
AIZR	ADFR	TEM_L1_5_EM_slices15to270 161	108
AIZR	ADFR	TEM_L1_5_EM_slices15to270 162	128
AIZR	ADFR	TEM_L1_5_EM_slices15to270 163	145
AIZR	ADFR	TEM_L1_5_EM_slices15to270 164	155
AIZR	ADFR	TEM_L1_5_EM_slices15to270 165	175
AIZR	ADFR	TEM_L1_5_EM_slices15to270 166	209
AIZR	ADFR	TEM_L1_5_EM_slices15to270 167	169
AIZR	ADFR	TEM_L1_5_EM_slices15to270 168	79
AIZR	ADFR	TEM_L1_5_EM_slices15to270 168	75
AIZR	ADFR	TEM_L1_5_EM_slices15to270 169	83
AIZR	ADFR	TEM_L1_5_EM_slices15to270 171	80
AIZR	ADFR	TEM_L1_5_EM_slices15to270 173	106
AIZR	ADFR	TEM_L1_5_EM_slices15to270 174	103
AIZR	ADFR	TEM_L1_5_EM_slices15to270 175	135
AIZR	ADFR	TEM_L1_5_EM_slices15to270 176	102
AIZR	ADFR	TEM_L1_5_EM_slices15to270 177	91
AIZR	ADFR	TEM_L1_5_EM_slices15to270 178	97
AIZR	ADFR	TEM_L1_5_EM_slices15to270 179	90
AIZR	ADFR	TEM_L1_5_EM_slices15to270 180	82
AIZR	ADFR	TEM_L1_5_EM_slices15to270 181	102
AIZR	ADFR	TEM_L1_5_EM_slices15to270 182	103
AIZR	ADFR	TEM_L1_5_EM_slices15to270 183	96
AIZR	ADFR	TEM_L1_5_EM_slices15to270 184	103
AIZR	ADFR	TEM_L1_5_EM_slices15to270 185	84
AIZR	ADFR	TEM_L1_5_EM_slices15to270 186	101
AIZR	ADFR	TEM_L1_5_EM_slices15to270 187	93
ASEL	ADFR	TEM_L1_5_EM_slices15to270 100	270
ASEL	ADFR	TEM_L1_5_EM_slices15to270 101	409
ASEL	ADFR	TEM_L1_5_EM_slices15to270 101	482
ASEL	ADFR	TEM_L1_5_EM_slices15to270 102	337
ASEL	ADFR	TEM_L1_5_EM_slices15to270 102	141
ASEL	ADFR	TEM_L1_5_EM_slices15to270 103	30
ASEL	ADFR	TEM_L1_5_EM_slices15to270 103	229
ASHL	ADFR	TEM_L1_5_EM_slices15to270 94	65
ASHL	ADFR	TEM_L1_5_EM_slices15to270 96	115
ASHL	ADFR	TEM_L1_5_EM_slices15to270 97	91
ASHL	ADFR	TEM_L1_5_EM_slices15to270 98	116
ASHL	ADFR	TEM_L1_5_EM_slices15to270 99	112
ASHL	ADFR	TEM_L1_5_EM_slices15to270 100	100
ASIR	ADFR	TEM_L1_5_EM_slices15to270 174	18
ASIR	ADFR	TEM_L1_5_EM_slices15to270 175	36
AVHL	ADFR	TEM_L1_5_EM_slices15to270 96	30
AVHL	ADFR	TEM_L1_5_EM_slices15to270 96	67
AVHL	ADFR	TEM_L1_5_EM_slices15to270 97	60
AVHL	ADFR	TEM_L1_5_EM_slices15to270 97	190
AVHL	ADFR	TEM_L1_5_EM_slices15to270 98	107
AVHL	ADFR	TEM_L1_5_EM_slices15to270 98	333
AVHL	ADFR	TEM_L1_5_EM_slices15to270 99	380
AVHL	ADFR	TEM_L1_5_EM_slices15to270 99	84
AVHL	ADFR	TEM_L1_5_EM_slices15to270 99	102
AVHL	ADFR	TEM_L1_5_EM_slices15to270 100	394
AVHL	ADFR	TEM_L1_5_EM_slices15to270 100	88
AVHL	ADFR	TEM_L1_5_EM_slices15to270 101	445
AVHL	ADFR	TEM_L1_5_EM_slices15to270 102	149
AVHL	ADFR	TEM_L1_5_EM_slices15to270 102	283
AVHL	ADFR	TEM_L1_5_EM_slices15to270 103	122
AVHL	ADFR	TEM_L1_5_EM_slices15to270 104	194
AVHL	ADFR	TEM_L1_5_EM_slices15to270 105	158
AVHL	ADFR	TEM_L1_5_EM_slices15to270 107	128
AVHL	ADFR	TEM_L1_5_EM_slices15to270 117	68
AVHL	ADFR	TEM_L1_5_EM_slices15to270 117	98
AVHL	ADFR	TEM_L1_5_EM_slices15to270 118	132
AVHL	ADFR	TEM_L1_5_EM_slices15to270 119	150
AVHL	ADFR	TEM_L1_5_EM_slices15to270 120	133
AVHL	ADFR	TEM_L1_5_EM_slices15to270 121	74
AVHL	ADFR	TEM_L1_5_EM_slices15to270 121	92
AVHL	ADFR	TEM_L1_5_EM_slices15to270 122	135
AVHL	ADFR	TEM_L1_5_EM_slices15to270 123	153
AVHL	ADFR	TEM_L1_5_EM_slices15to270 124	154
AVHL	ADFR	TEM_L1_5_EM_slices15to270 125	52
AVHL	ADFR	TEM_L1_5_EM_slices15to270 126	29
AVHL	ADFR	TEM_L1_5_EM_slices15to270 127	13
AVHL	ADFR	TEM_L1_5_EM_slices15to270 128	18
AVHL	ADFR	TEM_L1_5_EM_slices15to270 129	54
AVHL	ADFR	TEM_L1_5_EM_slices15to270 130	150
AVHL	ADFR	TEM_L1_5_EM_slices15to270 131	203
AVHL	ADFR	TEM_L1_5_EM_slices15to270 132	196
AVHL	ADFR	TEM_L1_5_EM_slices15to270 133	187
AVHL	ADFR	TEM_L1_5_EM_slices15to270 134	55
AWBR	ADFR	TEM_L1_5_EM_slices15to270 96	91
AWBR	ADFR	TEM_L1_5_EM_slices15to270 97	89
AWBR	ADFR	TEM_L1_5_EM_slices15to270 98	127
AWBR	ADFR	TEM_L1_5_EM_slices15to270 99	141
AWBR	ADFR	TEM_L1_5_EM_slices15to270 99	147
AWBR	ADFR	TEM_L1_5_EM_slices15to270 100	116
AWBR	ADFR	TEM_L1_5_EM_slices15to270 102	282
AWBR	ADFR	TEM_L1_5_EM_slices15to270 103	408
AWBR	ADFR	TEM_L1_5_EM_slices15to270 104	353
AWBR	ADFR	TEM_L1_5_EM_slices15to270 105	219
AWBR	ADFR	TEM_L1_5_EM_slices15to270 107	8
AWBR	ADFR	TEM_L1_5_EM_slices15to270 112	44
AWBR	ADFR	TEM_L1_5_EM_slices15to270 113	39
AWBR	ADFR	TEM_L1_5_EM_slices15to270 114	60
AWBR	ADFR	TEM_L1_5_EM_slices15to270 117	74
AWBR	ADFR	TEM_L1_5_EM_slices15to270 118	65
AWBR	ADFR	TEM_L1_5_EM_slices15to270 119	8
AWBR	ADFR	TEM_L1_5_EM_slices15to270 122	116
AWBR	ADFR	TEM_L1_5_EM_slices15to270 123	72
AWBR	ADFR	TEM_L1_5_EM_slices15to270 123	156
AWBR	ADFR	TEM_L1_5_EM_slices15to270 143	83
AWBR	ADFR	TEM_L1_5_EM_slices15to270 144	111
AWBR	ADFR	TEM_L1_5_EM_slices15to270 145	137
AWBR	ADFR	TEM_L1_5_EM_slices15to270 146	143
AWBR	ADFR	TEM_L1_5_EM_slices15to270 147	148
AWBR	ADFR	TEM_L1_5_EM_slices15to270 148	141
AWBR	ADFR	TEM_L1_5_EM_slices15to270 149	107
AWBR	ADFR	TEM_L1_5_EM_slices15to270 151	170
AWBR	ADFR	TEM_L1_5_EM_slices15to270 152	143
AWBR	ADFR	TEM_L1_5_EM_slices15to270 153	157
AWBR	ADFR	TEM_L1_5_EM_slices15to270 154	117
AWBR	ADFR	TEM_L1_5_EM_slices15to270 155	127
AWBR	ADFR	TEM_L1_5_EM_slices15to270 156	181
AWBR	ADFR	TEM_L1_5_EM_slices15to270 157	164
AWBR	ADFR	TEM_L1_5_EM_slices15to270 158	178
AWBR	ADFR	TEM_L1_5_EM_slices15to270 159	170
AWBR	ADFR	TEM_L1_5_EM_slices15to270 160	198
AWBR	ADFR	TEM_L1_5_EM_slices15to270 161	154
AWBR	ADFR	TEM_L1_5_EM_slices15to270 162	167
AWBR	ADFR	TEM_L1_5_EM_slices15to270 163	155
AWBR	ADFR	TEM_L1_5_EM_slices15to270 164	113
AWBR	ADFR	TEM_L1_5_EM_slices15to270 165	113
AWBR	ADFR	TEM_L1_5_EM_slices15to270 166	78
AWBR	ADFR	TEM_L1_5_EM_slices15to270 168	76
AWBR	ADFR	TEM_L1_5_EM_slices15to270 169	92
AWBR	ADFR	TEM_L1_5_EM_slices15to270 171	79
AWBR	ADFR	TEM_L1_5_EM_slices15to270 187	37
AWCR	ADFR	TEM_L1_5_EM_slices15to270 178	4
AWCR	ADFR	TEM_L1_5_EM_slices15to270 179	8
AWCR	ADFR	TEM_L1_5_EM_slices15to270 180	26
AWCR	ADFR	TEM_L1_5_EM_slices15to270 181	16
AWCR	ADFR	TEM_L1_5_EM_slices15to270 182	24
PVPR	ADFR	TEM_L1_5_EM_slices15to270 102	26
PVPR	ADFR	TEM_L1_5_EM_slices15to270 103	60
PVPR	ADFR	TEM_L1_5_EM_slices15to270 104	33
RIAR	ADFR	TEM_L1_5_EM_slices15to270 135	167
RIAR	ADFR	TEM_L1_5_EM_slices15to270 135	90
RIAR	ADFR	TEM_L1_5_EM_slices15to270 136	183
RIAR	ADFR	TEM_L1_5_EM_slices15to270 137	198
RIAR	ADFR	TEM_L1_5_EM_slices15to270 138	154
RIAR	ADFR	TEM_L1_5_EM_slices15to270 139	231
RIAR	ADFR	TEM_L1_5_EM_slices15to270 140	258
RIAR	ADFR	TEM_L1_5_EM_slices15to270 141	224
RIAR	ADFR	TEM_L1_5_EM_slices15to270 142	192
RIAR	ADFR	TEM_L1_5_EM_slices15to270 143	213
RIAR	ADFR	TEM_L1_5_EM_slices15to270 144	211
RIAR	ADFR	TEM_L1_5_EM_slices15to270 145	182
RIAR	ADFR	TEM_L1_5_EM_slices15to270 146	172
RIAR	ADFR	TEM_L1_5_EM_slices15to270 147	156
RIAR	ADFR	TEM_L1_5_EM_slices15to270 148	128
SIAVR	ADFR	TEM_L1_5_EM_slices15to270 149	38
SIAVR	ADFR	TEM_L1_5_EM_slices15to270 150	45
SIAVR	ADFR	TEM_L1_5_EM_slices15to270 151	52
SIAVR	ADFR	TEM_L1_5_EM_slices15to270 152	83
SIAVR	ADFR	TEM_L1_5_EM_slices15to270 153	58
SIAVR	ADFR	TEM_L1_5_EM_slices15to270 154	108
SIAVR	ADFR	TEM_L1_5_EM_slices15to270 155	74
SIAVR	ADFR	TEM_L1_5_EM_slices15to270 156	100
SIAVR	ADFR	TEM_L1_5_EM_slices15to270 157	86
SIAVR	ADFR	TEM_L1_5_EM_slices15to270 158	109
SIAVR	ADFR	TEM_L1_5_EM_slices15to270 159	61
SIAVR	ADFR	TEM_L1_5_EM_slices15to270 160	76
SIAVR	ADFR	TEM_L1_5_EM_slices15to270 161	60
SMBDR	ADFR	TEM_L1_5_EM_slices15to270 154	6
SMBDR	ADFR	TEM_L1_5_EM_slices15to270 155	4
SMBDR	ADFR	TEM_L1_5_EM_slices15to270 156	38
SMBDR	ADFR	TEM_L1_5_EM_slices15to270 157	88
SMBDR	ADFR	TEM_L1_5_EM_slices15to270 158	110
SMBDR	ADFR	TEM_L1_5_EM_slices15to270 159	144
SMBDR	ADFR	TEM_L1_5_EM_slices15to270 160	114
SMBDR	ADFR	TEM_L1_5_EM_slices15to270 161	153
SMBDR	ADFR	TEM_L1_5_EM_slices15to270 162	120
SMBDR	ADFR	TEM_L1_5_EM_slices15to270 163	121
SMBDR	ADFR	TEM_L1_5_EM_slices15to270 164	86
SMBDR	ADFR	TEM_L1_5_EM_slices15to270 165	116
SMBDR	ADFR	TEM_L1_5_EM_slices15to270 166	108
SMBDR	ADFR	TEM_L1_5_EM_slices15to270 167	67
SMBDR	ADFR	TEM_L1_5_EM_slices15to270 168	40
SMBVR	ADFR	TEM_L1_5_EM_slices15to270 141	92
SMBVR	ADFR	TEM_L1_5_EM_slices15to270 142	110
SMBVR	ADFR	TEM_L1_5_EM_slices15to270 143	166
SMBVR	ADFR	TEM_L1_5_EM_slices15to270 144	145
SMBVR	ADFR	TEM_L1_5_EM_slices15to270 145	216
SMBVR	ADFR	TEM_L1_5_EM_slices15to270 146	194
SMBVR	ADFR	TEM_L1_5_EM_slices15to270 147	240
SMBVR	ADFR	TEM_L1_5_EM_slices15to270 148	245
SMBVR	ADFR	TEM_L1_5_EM_slices15to270 149	162
SMBVR	ADFR	TEM_L1_5_EM_slices15to270 149	2
SMBVR	ADFR	TEM_L1_5_EM_slices15to270 150	166
SMBVR	ADFR	TEM_L1_5_EM_slices15to270 151	159
SMBVR	ADFR	TEM_L1_5_EM_slices15to270 152	195
SMBVR	ADFR	TEM_L1_5_EM_slices15to270 153	185
SMBVR	ADFR	TEM_L1_5_EM_slices15to270 154	221
SMBVR	ADFR	TEM_L1_5_EM_slices15to270 155	208
SMBVR	ADFR	TEM_L1_5_EM_slices15to270 156	211
SMBVR	ADFR	TEM_L1_5_EM_slices15to270 157	180
SMBVR	ADFR	TEM_L1_5_EM_slices15to270 158	173
SMBVR	ADFR	TEM_L1_5_EM_slices15to270 159	152
SMBVR	ADFR	TEM_L1_5_EM_slices15to270 160	138
SMBVR	ADFR	TEM_L1_5_EM_slices15to270 161	162
SMBVR	ADFR	TEM_L1_5_EM_slices15to270 162	133
SMBVR	ADFR	TEM_L1_5_EM_slices15to270 163	129
SMBVR	ADFR	TEM_L1_5_EM_slices15to270 164	108
SMBVR	ADFR	TEM_L1_5_EM_slices15to270 165	66
SMBVR	ADFR	TEM_L1_5_EM_slices15to270 176	43
SMBVR	ADFR	TEM_L1_5_EM_slices15to270 177	47
SMBVR	ADFR	TEM_L1_5_EM_slices15to270 178	70
SMBVR	ADFR	TEM_L1_5_EM_slices15to270 179	74
SMBVR	ADFR	TEM_L1_5_EM_slices15to270 180	66
SMBVR	ADFR	TEM_L1_5_EM_slices15to270 181	73
SMBVR	ADFR	TEM_L1_5_EM_slices15to270 182	80
SMBVR	ADFR	TEM_L1_5_EM_slices15to270 183	83
SMBVR	ADFR	TEM_L1_5_EM_slices15to270 184	61
SMBVR	ADFR	TEM_L1_5_EM_slices15to270 185	58
SMBVR	ADFR	TEM_L1_5_EM_slices15to270 186	86
SMBVR	ADFR	TEM_L1_5_EM_slices15to270 187	72
ADAL	ADLL	TEM_L1_5_EM_slices15to270 124	109
ADAL	ADLL	TEM_L1_5_EM_slices15to270 125	131
ADAL	ADLL	TEM_L1_5_EM_slices15to270 126	130
ADAL	ADLL	TEM_L1_5_EM_slices15to270 127	76
ADAL	ADLL	TEM_L1_5_EM_slices15to270 127	98
ADAL	ADLL	TEM_L1_5_EM_slices15to270 128	82
ADAL	ADLL	TEM_L1_5_EM_slices15to270 131	20
ADAL	ADLL	TEM_L1_5_EM_slices15to270 132	75
ADAL	ADLL	TEM_L1_5_EM_slices15to270 133	93
ADAL	ADLL	TEM_L1_5_EM_slices15to270 134	91
CEPDL	ADLL	TEM_L1_5_EM_slices15to270 121	41
PVQL	ADLL	TEM_L1_5_EM_slices15to270 118	44
PVQL	ADLL	TEM_L1_5_EM_slices15to270 122	98
PVQL	ADLL	TEM_L1_5_EM_slices15to270 123	139
PVQL	ADLL	TEM_L1_5_EM_slices15to270 124	140
PVQL	ADLL	TEM_L1_5_EM_slices15to270 125	182
PVQL	ADLL	TEM_L1_5_EM_slices15to270 126	133
PVQL	ADLL	TEM_L1_5_EM_slices15to270 127	121
PVQL	ADLL	TEM_L1_5_EM_slices15to270 128	119
PVQL	ADLL	TEM_L1_5_EM_slices15to270 129	80
PVQL	ADLL	TEM_L1_5_EM_slices15to270 130	62
PVQL	ADLL	TEM_L1_5_EM_slices15to270 131	44
PVQL	ADLL	TEM_L1_5_EM_slices15to270 132	41
PVQL	ADLL	TEM_L1_5_EM_slices15to270 133	28
PVQL	ADLL	TEM_L1_5_EM_slices15to270 135	85
PVQL	ADLL	TEM_L1_5_EM_slices15to270 136	107
PVQL	ADLL	TEM_L1_5_EM_slices15to270 137	136
PVQL	ADLL	TEM_L1_5_EM_slices15to270 138	164
PVQL	ADLL	TEM_L1_5_EM_slices15to270 139	163
PVQL	ADLL	TEM_L1_5_EM_slices15to270 140	112
PVQL	ADLL	TEM_L1_5_EM_slices15to270 141	92
PVQL	ADLL	TEM_L1_5_EM_slices15to270 142	69
PVQL	ADLL	TEM_L1_5_EM_slices15to270 143	76
PVQL	ADLL	TEM_L1_5_EM_slices15to270 144	91
PVQL	ADLL	TEM_L1_5_EM_slices15to270 144	167
PVQL	ADLL	TEM_L1_5_EM_slices15to270 145	278
PVQL	ADLL	TEM_L1_5_EM_slices15to270 146	141
URYDL	ADLL	TEM_L1_5_EM_slices15to270 114	118
URYDL	ADLL	TEM_L1_5_EM_slices15to270 115	46
URYVL	ADLL	TEM_L1_5_EM_slices15to270 120	63
URYVL	ADLL	TEM_L1_5_EM_slices15to270 121	184
URYVL	ADLL	TEM_L1_5_EM_slices15to270 122	128
URYVL	ADLL	TEM_L1_5_EM_slices15to270 123	125
URYVL	ADLL	TEM_L1_5_EM_slices15to270 124	114
URYVL	ADLL	TEM_L1_5_EM_slices15to270 125	131
URYVL	ADLL	TEM_L1_5_EM_slices15to270 126	128
URYVL	ADLL	TEM_L1_5_EM_slices15to270 127	77
URYVL	ADLL	TEM_L1_5_EM_slices15to270 128	9
ADAR	ADLR	TEM_L1_5_EM_slices15to270 125	82
ADAR	ADLR	TEM_L1_5_EM_slices15to270 127	124
ADAR	ADLR	TEM_L1_5_EM_slices15to270 128	91
ADAR	ADLR	TEM_L1_5_EM_slices15to270 137	236
ADAR	ADLR	TEM_L1_5_EM_slices15to270 138	213
ADAR	ADLR	TEM_L1_5_EM_slices15to270 139	58
ADAR	ADLR	TEM_L1_5_EM_slices15to270 140	61
ADAR	ADLR	TEM_L1_5_EM_slices15to270 141	34
ADLL	ADLR	TEM_L1_5_EM_slices15to270 117	115
ADLL	ADLR	TEM_L1_5_EM_slices15to270 118	202
ADLL	ADLR	TEM_L1_5_EM_slices15to270 119	206
ADLL	ADLR	TEM_L1_5_EM_slices15to270 120	166
ADLL	ADLR	TEM_L1_5_EM_slices15to270 121	230
ADLL	ADLR	TEM_L1_5_EM_slices15to270 122	240
ADLL	ADLR	TEM_L1_5_EM_slices15to270 123	197
ADLL	ADLR	TEM_L1_5_EM_slices15to270 124	147
ADLL	ADLR	TEM_L1_5_EM_slices15to270 125	135
ADLL	ADLR	TEM_L1_5_EM_slices15to270 126	62
AIAR	ADLR	TEM_L1_5_EM_slices15to270 114	119
AIAR	ADLR	TEM_L1_5_EM_slices15to270 114	140
AIAR	ADLR	TEM_L1_5_EM_slices15to270 115	117
AIAR	ADLR	TEM_L1_5_EM_slices15to270 116	183
AIAR	ADLR	TEM_L1_5_EM_slices15to270 117	358
AIAR	ADLR	TEM_L1_5_EM_slices15to270 118	311
AIAR	ADLR	TEM_L1_5_EM_slices15to270 119	254
AIAR	ADLR	TEM_L1_5_EM_slices15to270 120	141
AIAR	ADLR	TEM_L1_5_EM_slices15to270 133	85
AIAR	ADLR	TEM_L1_5_EM_slices15to270 134	102
AIAR	ADLR	TEM_L1_5_EM_slices15to270 135	57
AIAR	ADLR	TEM_L1_5_EM_slices15to270 136	2
AIAR	ADLR	TEM_L1_5_EM_slices15to270 137	26
AIAR	ADLR	TEM_L1_5_EM_slices15to270 138	48
AIAR	ADLR	TEM_L1_5_EM_slices15to270 139	91
AIAR	ADLR	TEM_L1_5_EM_slices15to270 139	84
AIAR	ADLR	TEM_L1_5_EM_slices15to270 140	46
AIAR	ADLR	TEM_L1_5_EM_slices15to270 141	46
AIAR	ADLR	TEM_L1_5_EM_slices15to270 142	45
AIAR	ADLR	TEM_L1_5_EM_slices15to270 143	42
AIAR	ADLR	TEM_L1_5_EM_slices15to270 144	28
AIAR	ADLR	TEM_L1_5_EM_slices15to270 145	43
AIAR	ADLR	TEM_L1_5_EM_slices15to270 146	8
AIBR	ADLR	TEM_L1_5_EM_slices15to270 111	46
AIBR	ADLR	TEM_L1_5_EM_slices15to270 111	80
AIBR	ADLR	TEM_L1_5_EM_slices15to270 112	23
AIBR	ADLR	TEM_L1_5_EM_slices15to270 112	57
AIBR	ADLR	TEM_L1_5_EM_slices15to270 113	149
AIBR	ADLR	TEM_L1_5_EM_slices15to270 114	128
AIBR	ADLR	TEM_L1_5_EM_slices15to270 114	122
AIBR	ADLR	TEM_L1_5_EM_slices15to270 115	128
AIBR	ADLR	TEM_L1_5_EM_slices15to270 116	159
AIBR	ADLR	TEM_L1_5_EM_slices15to270 116	90
AIBR	ADLR	TEM_L1_5_EM_slices15to270 117	68
AIBR	ADLR	TEM_L1_5_EM_slices15to270 117	120
AIBR	ADLR	TEM_L1_5_EM_slices15to270 118	95
AIBR	ADLR	TEM_L1_5_EM_slices15to270 119	74
AIBR	ADLR	TEM_L1_5_EM_slices15to270 120	59
AIBR	ADLR	TEM_L1_5_EM_slices15to270 121	59
AIBR	ADLR	TEM_L1_5_EM_slices15to270 122	8
AIBR	ADLR	TEM_L1_5_EM_slices15to270 123	57
AIBR	ADLR	TEM_L1_5_EM_slices15to270 124	51
AIBR	ADLR	TEM_L1_5_EM_slices15to270 125	74
AIBR	ADLR	TEM_L1_5_EM_slices15to270 132	490
AIBR	ADLR	TEM_L1_5_EM_slices15to270 133	61
AIBR	ADLR	TEM_L1_5_EM_slices15to270 134	282
AIBR	ADLR	TEM_L1_5_EM_slices15to270 135	338
AIBR	ADLR	TEM_L1_5_EM_slices15to270 135	231
AIBR	ADLR	TEM_L1_5_EM_slices15to270 136	173
AIBR	ADLR	TEM_L1_5_EM_slices15to270 136	128
AIBR	ADLR	TEM_L1_5_EM_slices15to270 136	165
AIBR	ADLR	TEM_L1_5_EM_slices15to270 137	139
AIBR	ADLR	TEM_L1_5_EM_slices15to270 137	182
AIBR	ADLR	TEM_L1_5_EM_slices15to270 138	251
AIBR	ADLR	TEM_L1_5_EM_slices15to270 139	221
AIBR	ADLR	TEM_L1_5_EM_slices15to270 140	107
AIBR	ADLR	TEM_L1_5_EM_slices15to270 141	83
AIBR	ADLR	TEM_L1_5_EM_slices15to270 142	81
AIBR	ADLR	TEM_L1_5_EM_slices15to270 143	143
AIBR	ADLR	TEM_L1_5_EM_slices15to270 144	132
AIBR	ADLR	TEM_L1_5_EM_slices15to270 145	156
AIBR	ADLR	TEM_L1_5_EM_slices15to270 146	137
AIBR	ADLR	TEM_L1_5_EM_slices15to270 147	98
AIBR	ADLR	TEM_L1_5_EM_slices15to270 148	104
AIBR	ADLR	TEM_L1_5_EM_slices15to270 149	82
AIYR	ADLR	TEM_L1_5_EM_slices15to270 144	52
ALA	ADLR	TEM_L1_5_EM_slices15to270 112	114
ALA	ADLR	TEM_L1_5_EM_slices15to270 112	205
ALA	ADLR	TEM_L1_5_EM_slices15to270 113	124
ALA	ADLR	TEM_L1_5_EM_slices15to270 113	230
ALA	ADLR	TEM_L1_5_EM_slices15to270 114	182
ALA	ADLR	TEM_L1_5_EM_slices15to270 114	51
ALA	ADLR	TEM_L1_5_EM_slices15to270 115	255
ALA	ADLR	TEM_L1_5_EM_slices15to270 115	168
ALA	ADLR	TEM_L1_5_EM_slices15to270 116	277
ALA	ADLR	TEM_L1_5_EM_slices15to270 116	112
ALA	ADLR	TEM_L1_5_EM_slices15to270 117	332
ALA	ADLR	TEM_L1_5_EM_slices15to270 117	124
ALA	ADLR	TEM_L1_5_EM_slices15to270 118	401
ALA	ADLR	TEM_L1_5_EM_slices15to270 119	185
ALA	ADLR	TEM_L1_5_EM_slices15to270 119	120
ALA	ADLR	TEM_L1_5_EM_slices15to270 119	84
ALA	ADLR	TEM_L1_5_EM_slices15to270 120	188
ALA	ADLR	TEM_L1_5_EM_slices15to270 120	112
ALA	ADLR	TEM_L1_5_EM_slices15to270 121	188
ALA	ADLR	TEM_L1_5_EM_slices15to270 121	90
ALA	ADLR	TEM_L1_5_EM_slices15to270 122	43
ALA	ADLR	TEM_L1_5_EM_slices15to270 122	94
ALA	ADLR	TEM_L1_5_EM_slices15to270 137	63
ALA	ADLR	TEM_L1_5_EM_slices15to270 138	71
ALA	ADLR	TEM_L1_5_EM_slices15to270 139	74
ALA	ADLR	TEM_L1_5_EM_slices15to270 140	109
ALA	ADLR	TEM_L1_5_EM_slices15to270 141	111
ALA	ADLR	TEM_L1_5_EM_slices15to270 142	107
ALA	ADLR	TEM_L1_5_EM_slices15to270 143	124
ALA	ADLR	TEM_L1_5_EM_slices15to270 144	110
ALA	ADLR	TEM_L1_5_EM_slices15to270 145	135
ALA	ADLR	TEM_L1_5_EM_slices15to270 146	128
ALA	ADLR	TEM_L1_5_EM_slices15to270 147	155
ALA	ADLR	TEM_L1_5_EM_slices15to270 148	174
ALA	ADLR	TEM_L1_5_EM_slices15to270 149	180
ALA	ADLR	TEM_L1_5_EM_slices15to270 151	244
ALA	ADLR	TEM_L1_5_EM_slices15to270 152	300
ALA	ADLR	TEM_L1_5_EM_slices15to270 153	314
ALA	ADLR	TEM_L1_5_EM_slices15to270 154	178
ALA	ADLR	TEM_L1_5_EM_slices15to270 155	148
ALA	ADLR	TEM_L1_5_EM_slices15to270 155	74
ALA	ADLR	TEM_L1_5_EM_slices15to270 156	83
ALA	ADLR	TEM_L1_5_EM_slices15to270 156	114
ASER	ADLR	TEM_L1_5_EM_slices15to270 132	188
ASER	ADLR	TEM_L1_5_EM_slices15to270 133	561
ASER	ADLR	TEM_L1_5_EM_slices15to270 134	627
ASER	ADLR	TEM_L1_5_EM_slices15to270 135	585
ASER	ADLR	TEM_L1_5_EM_slices15to270 136	237
ASER	ADLR	TEM_L1_5_EM_slices15to270 136	146
ASER	ADLR	TEM_L1_5_EM_slices15to270 137	210
ASER	ADLR	TEM_L1_5_EM_slices15to270 138	164
ASER	ADLR	TEM_L1_5_EM_slices15to270 139	160
ASER	ADLR	TEM_L1_5_EM_slices15to270 140	194
ASER	ADLR	TEM_L1_5_EM_slices15to270 141	139
ASER	ADLR	TEM_L1_5_EM_slices15to270 142	186
ASER	ADLR	TEM_L1_5_EM_slices15to270 143	196
ASER	ADLR	TEM_L1_5_EM_slices15to270 144	169
ASER	ADLR	TEM_L1_5_EM_slices15to270 145	118
ASER	ADLR	TEM_L1_5_EM_slices15to270 146	137
ASER	ADLR	TEM_L1_5_EM_slices15to270 147	122
ASER	ADLR	TEM_L1_5_EM_slices15to270 148	93
ASER	ADLR	TEM_L1_5_EM_slices15to270 149	113
ASHR	ADLR	TEM_L1_5_EM_slices15to270 127	83
ASHR	ADLR	TEM_L1_5_EM_slices15to270 128	73
ASHR	ADLR	TEM_L1_5_EM_slices15to270 131	138
ASHR	ADLR	TEM_L1_5_EM_slices15to270 132	98
ASHR	ADLR	TEM_L1_5_EM_slices15to270 133	44
ASHR	ADLR	TEM_L1_5_EM_slices15to270 134	2
ASHR	ADLR	TEM_L1_5_EM_slices15to270 135	165
ASHR	ADLR	TEM_L1_5_EM_slices15to270 136	104
ASHR	ADLR	TEM_L1_5_EM_slices15to270 136	145
ASHR	ADLR	TEM_L1_5_EM_slices15to270 137	126
ASHR	ADLR	TEM_L1_5_EM_slices15to270 138	161
ASHR	ADLR	TEM_L1_5_EM_slices15to270 143	51
ASHR	ADLR	TEM_L1_5_EM_slices15to270 144	44
ASHR	ADLR	TEM_L1_5_EM_slices15to270 145	50
ASHR	ADLR	TEM_L1_5_EM_slices15to270 146	135
ASHR	ADLR	TEM_L1_5_EM_slices15to270 147	109
ASHR	ADLR	TEM_L1_5_EM_slices15to270 148	43
ASHR	ADLR	TEM_L1_5_EM_slices15to270 149	38
ASIR	ADLR	TEM_L1_5_EM_slices15to270 113	274
ASIR	ADLR	TEM_L1_5_EM_slices15to270 114	351
ASIR	ADLR	TEM_L1_5_EM_slices15to270 115	306
ASIR	ADLR	TEM_L1_5_EM_slices15to270 116	275
ASIR	ADLR	TEM_L1_5_EM_slices15to270 118	32
ASIR	ADLR	TEM_L1_5_EM_slices15to270 133	133
ASIR	ADLR	TEM_L1_5_EM_slices15to270 135	154
ASIR	ADLR	TEM_L1_5_EM_slices15to270 136	126
ASIR	ADLR	TEM_L1_5_EM_slices15to270 137	142
ASJR	ADLR	TEM_L1_5_EM_slices15to270 140	176
ASJR	ADLR	TEM_L1_5_EM_slices15to270 141	100
ASJR	ADLR	TEM_L1_5_EM_slices15to270 142	242
ASJR	ADLR	TEM_L1_5_EM_slices15to270 143	258
ASJR	ADLR	TEM_L1_5_EM_slices15to270 144	237
ASJR	ADLR	TEM_L1_5_EM_slices15to270 145	267
ASJR	ADLR	TEM_L1_5_EM_slices15to270 146	272
ASJR	ADLR	TEM_L1_5_EM_slices15to270 147	206
ASJR	ADLR	TEM_L1_5_EM_slices15to270 148	209
ASJR	ADLR	TEM_L1_5_EM_slices15to270 149	142
ASKR	ADLR	TEM_L1_5_EM_slices15to270 111	688
ASKR	ADLR	TEM_L1_5_EM_slices15to270 112	91
ASKR	ADLR	TEM_L1_5_EM_slices15to270 113	195
ASKR	ADLR	TEM_L1_5_EM_slices15to270 114	214
ASKR	ADLR	TEM_L1_5_EM_slices15to270 115	169
ASKR	ADLR	TEM_L1_5_EM_slices15to270 115	154
ASKR	ADLR	TEM_L1_5_EM_slices15to270 116	184
ASKR	ADLR	TEM_L1_5_EM_slices15to270 116	138
ASKR	ADLR	TEM_L1_5_EM_slices15to270 117	82
ASKR	ADLR	TEM_L1_5_EM_slices15to270 117	151
ASKR	ADLR	TEM_L1_5_EM_slices15to270 118	185
ASKR	ADLR	TEM_L1_5_EM_slices15to270 119	241
ASKR	ADLR	TEM_L1_5_EM_slices15to270 120	55
ASKR	ADLR	TEM_L1_5_EM_slices15to270 120	389
ASKR	ADLR	TEM_L1_5_EM_slices15to270 121	99
ASKR	ADLR	TEM_L1_5_EM_slices15to270 121	516
ASKR	ADLR	TEM_L1_5_EM_slices15to270 122	147
ASKR	ADLR	TEM_L1_5_EM_slices15to270 122	538
ASKR	ADLR	TEM_L1_5_EM_slices15to270 123	204
ASKR	ADLR	TEM_L1_5_EM_slices15to270 123	580
ASKR	ADLR	TEM_L1_5_EM_slices15to270 124	257
ASKR	ADLR	TEM_L1_5_EM_slices15to270 124	507
ASKR	ADLR	TEM_L1_5_EM_slices15to270 125	64
ASKR	ADLR	TEM_L1_5_EM_slices15to270 125	504
ASKR	ADLR	TEM_L1_5_EM_slices15to270 126	501
ASKR	ADLR	TEM_L1_5_EM_slices15to270 127	430
ASKR	ADLR	TEM_L1_5_EM_slices15to270 128	368
ASKR	ADLR	TEM_L1_5_EM_slices15to270 129	209
ASKR	ADLR	TEM_L1_5_EM_slices15to270 130	147
ASKR	ADLR	TEM_L1_5_EM_slices15to270 132	132
ASKR	ADLR	TEM_L1_5_EM_slices15to270 133	415
ASKR	ADLR	TEM_L1_5_EM_slices15to270 134	294
ASKR	ADLR	TEM_L1_5_EM_slices15to270 135	135
ASKR	ADLR	TEM_L1_5_EM_slices15to270 135	272
ASKR	ADLR	TEM_L1_5_EM_slices15to270 136	156
ASKR	ADLR	TEM_L1_5_EM_slices15to270 137	436
ASKR	ADLR	TEM_L1_5_EM_slices15to270 138	326
ASKR	ADLR	TEM_L1_5_EM_slices15to270 139	324
ASKR	ADLR	TEM_L1_5_EM_slices15to270 140	123
ASKR	ADLR	TEM_L1_5_EM_slices15to270 140	231
ASKR	ADLR	TEM_L1_5_EM_slices15to270 141	86
ASKR	ADLR	TEM_L1_5_EM_slices15to270 141	172
ASKR	ADLR	TEM_L1_5_EM_slices15to270 142	154
ASKR	ADLR	TEM_L1_5_EM_slices15to270 143	181
ASKR	ADLR	TEM_L1_5_EM_slices15to270 144	154
ASKR	ADLR	TEM_L1_5_EM_slices15to270 145	167
ASKR	ADLR	TEM_L1_5_EM_slices15to270 146	154
ASKR	ADLR	TEM_L1_5_EM_slices15to270 147	127
ASKR	ADLR	TEM_L1_5_EM_slices15to270 148	41
AVBL	ADLR	TEM_L1_5_EM_slices15to270 134	99
AVBL	ADLR	TEM_L1_5_EM_slices15to270 135	153
AVBL	ADLR	TEM_L1_5_EM_slices15to270 136	132
AVBL	ADLR	TEM_L1_5_EM_slices15to270 137	152
AVBL	ADLR	TEM_L1_5_EM_slices15to270 138	147
AVDL	ADLR	TEM_L1_5_EM_slices15to270 125	17
AVDL	ADLR	TEM_L1_5_EM_slices15to270 132	9
AVDL	ADLR	TEM_L1_5_EM_slices15to270 133	78
AVDL	ADLR	TEM_L1_5_EM_slices15to270 134	214
AVDL	ADLR	TEM_L1_5_EM_slices15to270 135	228
AVDL	ADLR	TEM_L1_5_EM_slices15to270 136	148
AVDL	ADLR	TEM_L1_5_EM_slices15to270 136	105
AVDL	ADLR	TEM_L1_5_EM_slices15to270 137	39
AVDR	ADLR	TEM_L1_5_EM_slices15to270 122	12
AVDR	ADLR	TEM_L1_5_EM_slices15to270 123	138
AVDR	ADLR	TEM_L1_5_EM_slices15to270 124	222
AVHL	ADLR	TEM_L1_5_EM_slices15to270 127	63
AVHL	ADLR	TEM_L1_5_EM_slices15to270 128	32
AVHL	ADLR	TEM_L1_5_EM_slices15to270 134	84
AVHL	ADLR	TEM_L1_5_EM_slices15to270 135	70
AVHL	ADLR	TEM_L1_5_EM_slices15to270 136	57
AVHL	ADLR	TEM_L1_5_EM_slices15to270 137	64
AVHL	ADLR	TEM_L1_5_EM_slices15to270 138	40
AVJL	ADLR	TEM_L1_5_EM_slices15to270 128	96
AVJL	ADLR	TEM_L1_5_EM_slices15to270 129	156
AVJL	ADLR	TEM_L1_5_EM_slices15to270 135	56
AVJL	ADLR	TEM_L1_5_EM_slices15to270 136	128
AVJL	ADLR	TEM_L1_5_EM_slices15to270 137	109
AVJL	ADLR	TEM_L1_5_EM_slices15to270 138	60
AVJL	ADLR	TEM_L1_5_EM_slices15to270 140	45
AVJL	ADLR	TEM_L1_5_EM_slices15to270 141	26
AVJL	ADLR	TEM_L1_5_EM_slices15to270 143	58
AVJL	ADLR	TEM_L1_5_EM_slices15to270 144	36
AVJL	ADLR	TEM_L1_5_EM_slices15to270 145	35
AVJR	ADLR	TEM_L1_5_EM_slices15to270 119	135
AVJR	ADLR	TEM_L1_5_EM_slices15to270 119	39
AVJR	ADLR	TEM_L1_5_EM_slices15to270 120	209
AVJR	ADLR	TEM_L1_5_EM_slices15to270 120	91
AVJR	ADLR	TEM_L1_5_EM_slices15to270 121	246
AVJR	ADLR	TEM_L1_5_EM_slices15to270 121	145
AVJR	ADLR	TEM_L1_5_EM_slices15to270 122	229
AVJR	ADLR	TEM_L1_5_EM_slices15to270 122	121
AVJR	ADLR	TEM_L1_5_EM_slices15to270 123	184
AWAR	ADLR	TEM_L1_5_EM_slices15to270 126	12
AWAR	ADLR	TEM_L1_5_EM_slices15to270 127	95
AWAR	ADLR	TEM_L1_5_EM_slices15to270 128	207
AWAR	ADLR	TEM_L1_5_EM_slices15to270 129	325
AWAR	ADLR	TEM_L1_5_EM_slices15to270 130	170
AWAR	ADLR	TEM_L1_5_EM_slices15to270 131	133
AWAR	ADLR	TEM_L1_5_EM_slices15to270 132	337
AWAR	ADLR	TEM_L1_5_EM_slices15to270 132	353
AWAR	ADLR	TEM_L1_5_EM_slices15to270 133	194
AWAR	ADLR	TEM_L1_5_EM_slices15to270 133	187
AWAR	ADLR	TEM_L1_5_EM_slices15to270 133	105
AWAR	ADLR	TEM_L1_5_EM_slices15to270 134	282
AWAR	ADLR	TEM_L1_5_EM_slices15to270 135	185
AWAR	ADLR	TEM_L1_5_EM_slices15to270 136	140
AWAR	ADLR	TEM_L1_5_EM_slices15to270 137	90
AWAR	ADLR	TEM_L1_5_EM_slices15to270 138	125
AWAR	ADLR	TEM_L1_5_EM_slices15to270 139	61
AWAR	ADLR	TEM_L1_5_EM_slices15to270 140	20
AWAR	ADLR	TEM_L1_5_EM_slices15to270 141	81
AWAR	ADLR	TEM_L1_5_EM_slices15to270 142	151
AWAR	ADLR	TEM_L1_5_EM_slices15to270 143	26
AWAR	ADLR	TEM_L1_5_EM_slices15to270 144	60
AWAR	ADLR	TEM_L1_5_EM_slices15to270 145	57
AWAR	ADLR	TEM_L1_5_EM_slices15to270 146	81
AWAR	ADLR	TEM_L1_5_EM_slices15to270 147	117
AWAR	ADLR	TEM_L1_5_EM_slices15to270 148	85
AWAR	ADLR	TEM_L1_5_EM_slices15to270 149	68
AWBR	ADLR	TEM_L1_5_EM_slices15to270 125	151
AWBR	ADLR	TEM_L1_5_EM_slices15to270 126	102
AWBR	ADLR	TEM_L1_5_EM_slices15to270 126	66
AWBR	ADLR	TEM_L1_5_EM_slices15to270 127	136
AWBR	ADLR	TEM_L1_5_EM_slices15to270 127	108
AWBR	ADLR	TEM_L1_5_EM_slices15to270 128	140
AWBR	ADLR	TEM_L1_5_EM_slices15to270 128	83
AWBR	ADLR	TEM_L1_5_EM_slices15to270 129	101
AWBR	ADLR	TEM_L1_5_EM_slices15to270 130	67
AWBR	ADLR	TEM_L1_5_EM_slices15to270 131	82
AWBR	ADLR	TEM_L1_5_EM_slices15to270 132	94
AWBR	ADLR	TEM_L1_5_EM_slices15to270 132	106
AWBR	ADLR	TEM_L1_5_EM_slices15to270 133	145
AWBR	ADLR	TEM_L1_5_EM_slices15to270 133	176
AWBR	ADLR	TEM_L1_5_EM_slices15to270 133	48
AWBR	ADLR	TEM_L1_5_EM_slices15to270 134	118
AWBR	ADLR	TEM_L1_5_EM_slices15to270 135	99
AWBR	ADLR	TEM_L1_5_EM_slices15to270 136	137
AWBR	ADLR	TEM_L1_5_EM_slices15to270 137	104
AWBR	ADLR	TEM_L1_5_EM_slices15to270 138	118
AWBR	ADLR	TEM_L1_5_EM_slices15to270 139	131
AWBR	ADLR	TEM_L1_5_EM_slices15to270 140	119
AWCL	ADLR	TEM_L1_5_EM_slices15to270 113	334
AWCL	ADLR	TEM_L1_5_EM_slices15to270 114	439
AWCL	ADLR	TEM_L1_5_EM_slices15to270 115	469
AWCL	ADLR	TEM_L1_5_EM_slices15to270 116	380
AWCL	ADLR	TEM_L1_5_EM_slices15to270 117	279
AWCL	ADLR	TEM_L1_5_EM_slices15to270 118	81
AWCR	ADLR	TEM_L1_5_EM_slices15to270 111	158
AWCR	ADLR	TEM_L1_5_EM_slices15to270 112	154
AWCR	ADLR	TEM_L1_5_EM_slices15to270 112	143
AWCR	ADLR	TEM_L1_5_EM_slices15to270 113	159
AWCR	ADLR	TEM_L1_5_EM_slices15to270 113	178
AWCR	ADLR	TEM_L1_5_EM_slices15to270 113	98
AWCR	ADLR	TEM_L1_5_EM_slices15to270 113	214
AWCR	ADLR	TEM_L1_5_EM_slices15to270 114	158
AWCR	ADLR	TEM_L1_5_EM_slices15to270 114	176
AWCR	ADLR	TEM_L1_5_EM_slices15to270 114	129
AWCR	ADLR	TEM_L1_5_EM_slices15to270 114	192
AWCR	ADLR	TEM_L1_5_EM_slices15to270 115	120
AWCR	ADLR	TEM_L1_5_EM_slices15to270 115	359
AWCR	ADLR	TEM_L1_5_EM_slices15to270 115	219
AWCR	ADLR	TEM_L1_5_EM_slices15to270 116	141
AWCR	ADLR	TEM_L1_5_EM_slices15to270 116	246
AWCR	ADLR	TEM_L1_5_EM_slices15to270 116	244
AWCR	ADLR	TEM_L1_5_EM_slices15to270 117	95
AWCR	ADLR	TEM_L1_5_EM_slices15to270 117	104
AWCR	ADLR	TEM_L1_5_EM_slices15to270 118	119
AWCR	ADLR	TEM_L1_5_EM_slices15to270 119	69
AWCR	ADLR	TEM_L1_5_EM_slices15to270 120	74
AWCR	ADLR	TEM_L1_5_EM_slices15to270 121	66
AWCR	ADLR	TEM_L1_5_EM_slices15to270 123	2
AWCR	ADLR	TEM_L1_5_EM_slices15to270 125	45
AWCR	ADLR	TEM_L1_5_EM_slices15to270 132	12
AWCR	ADLR	TEM_L1_5_EM_slices15to270 133	117
AWCR	ADLR	TEM_L1_5_EM_slices15to270 135	190
AWCR	ADLR	TEM_L1_5_EM_slices15to270 136	240
AWCR	ADLR	TEM_L1_5_EM_slices15to270 137	280
AWCR	ADLR	TEM_L1_5_EM_slices15to270 138	268
AWCR	ADLR	TEM_L1_5_EM_slices15to270 139	244
AWCR	ADLR	TEM_L1_5_EM_slices15to270 140	257
AWCR	ADLR	TEM_L1_5_EM_slices15to270 141	266
AWCR	ADLR	TEM_L1_5_EM_slices15to270 142	215
AWCR	ADLR	TEM_L1_5_EM_slices15to270 143	210
AWCR	ADLR	TEM_L1_5_EM_slices15to270 144	192
AWCR	ADLR	TEM_L1_5_EM_slices15to270 145	229
AWCR	ADLR	TEM_L1_5_EM_slices15to270 146	221
AWCR	ADLR	TEM_L1_5_EM_slices15to270 147	171
AWCR	ADLR	TEM_L1_5_EM_slices15to270 148	175
CANR	ADLR	TEM_L1_5_EM_slices15to270 143	68
CANR	ADLR	TEM_L1_5_EM_slices15to270 144	78
CANR	ADLR	TEM_L1_5_EM_slices15to270 145	101
CANR	ADLR	TEM_L1_5_EM_slices15to270 146	106
CANR	ADLR	TEM_L1_5_EM_slices15to270 147	101
CANR	ADLR	TEM_L1_5_EM_slices15to270 148	80
CANR	ADLR	TEM_L1_5_EM_slices15to270 149	88
CANR	ADLR	TEM_L1_5_EM_slices15to270 151	18
CANR	ADLR	TEM_L1_5_EM_slices15to270 152	2
CANR	ADLR	TEM_L1_5_EM_slices15to270 153	5
CANR	ADLR	TEM_L1_5_EM_slices15to270 155	67
CANR	ADLR	TEM_L1_5_EM_slices15to270 156	85
IL1DR	ADLR	TEM_L1_5_EM_slices15to270 111	102
IL1DR	ADLR	TEM_L1_5_EM_slices15to270 112	118
IL1DR	ADLR	TEM_L1_5_EM_slices15to270 113	79
IL1DR	ADLR	TEM_L1_5_EM_slices15to270 114	46
IL2R	ADLR	TEM_L1_5_EM_slices15to270 124	82
IL2R	ADLR	TEM_L1_5_EM_slices15to270 125	102
OLQDR	ADLR	TEM_L1_5_EM_slices15to270 111	139
OLQDR	ADLR	TEM_L1_5_EM_slices15to270 112	164
OLQVR	ADLR	TEM_L1_5_EM_slices15to270 125	142
OLQVR	ADLR	TEM_L1_5_EM_slices15to270 127	24
PVCR	ADLR	TEM_L1_5_EM_slices15to270 127	98
PVCR	ADLR	TEM_L1_5_EM_slices15to270 128	87
PVCR	ADLR	TEM_L1_5_EM_slices15to270 129	91
PVCR	ADLR	TEM_L1_5_EM_slices15to270 130	85
PVCR	ADLR	TEM_L1_5_EM_slices15to270 132	176
PVCR	ADLR	TEM_L1_5_EM_slices15to270 133	169
PVCR	ADLR	TEM_L1_5_EM_slices15to270 134	137
PVCR	ADLR	TEM_L1_5_EM_slices15to270 135	42
PVCR	ADLR	TEM_L1_5_EM_slices15to270 140	57
PVCR	ADLR	TEM_L1_5_EM_slices15to270 142	6
PVCR	ADLR	TEM_L1_5_EM_slices15to270 143	100
PVCR	ADLR	TEM_L1_5_EM_slices15to270 144	117
PVCR	ADLR	TEM_L1_5_EM_slices15to270 145	127
PVCR	ADLR	TEM_L1_5_EM_slices15to270 146	66
PVPR	ADLR	TEM_L1_5_EM_slices15to270 132	19
PVPR	ADLR	TEM_L1_5_EM_slices15to270 133	100
PVPR	ADLR	TEM_L1_5_EM_slices15to270 134	128
PVPR	ADLR	TEM_L1_5_EM_slices15to270 143	154
PVPR	ADLR	TEM_L1_5_EM_slices15to270 144	230
PVPR	ADLR	TEM_L1_5_EM_slices15to270 145	249
PVPR	ADLR	TEM_L1_5_EM_slices15to270 146	248
PVPR	ADLR	TEM_L1_5_EM_slices15to270 147	259
PVPR	ADLR	TEM_L1_5_EM_slices15to270 148	174
PVPR	ADLR	TEM_L1_5_EM_slices15to270 149	85
PVQR	ADLR	TEM_L1_5_EM_slices15to270 135	62
PVQR	ADLR	TEM_L1_5_EM_slices15to270 136	189
PVQR	ADLR	TEM_L1_5_EM_slices15to270 137	277
PVQR	ADLR	TEM_L1_5_EM_slices15to270 138	303
PVQR	ADLR	TEM_L1_5_EM_slices15to270 139	265
PVQR	ADLR	TEM_L1_5_EM_slices15to270 140	261
PVQR	ADLR	TEM_L1_5_EM_slices15to270 141	231
PVQR	ADLR	TEM_L1_5_EM_slices15to270 142	234
PVQR	ADLR	TEM_L1_5_EM_slices15to270 143	202
PVQR	ADLR	TEM_L1_5_EM_slices15to270 144	140
PVQR	ADLR	TEM_L1_5_EM_slices15to270 145	123
PVQR	ADLR	TEM_L1_5_EM_slices15to270 149	123
PVQR	ADLR	TEM_L1_5_EM_slices15to270 151	294
PVQR	ADLR	TEM_L1_5_EM_slices15to270 152	269
PVQR	ADLR	TEM_L1_5_EM_slices15to270 153	263
PVQR	ADLR	TEM_L1_5_EM_slices15to270 154	240
PVQR	ADLR	TEM_L1_5_EM_slices15to270 155	182
PVQR	ADLR	TEM_L1_5_EM_slices15to270 156	101
RMGR	ADLR	TEM_L1_5_EM_slices15to270 138	65
RMGR	ADLR	TEM_L1_5_EM_slices15to270 139	96
RMGR	ADLR	TEM_L1_5_EM_slices15to270 140	136
RMGR	ADLR	TEM_L1_5_EM_slices15to270 141	122
SIBDL	ADLR	TEM_L1_5_EM_slices15to270 123	116
SIBDL	ADLR	TEM_L1_5_EM_slices15to270 124	248
SMBVR	ADLR	TEM_L1_5_EM_slices15to270 131	135
SMBVR	ADLR	TEM_L1_5_EM_slices15to270 132	248
SMBVR	ADLR	TEM_L1_5_EM_slices15to270 133	341
SMBVR	ADLR	TEM_L1_5_EM_slices15to270 133	144
SMBVR	ADLR	TEM_L1_5_EM_slices15to270 134	478
SMBVR	ADLR	TEM_L1_5_EM_slices15to270 135	237
SMBVR	ADLR	TEM_L1_5_EM_slices15to270 135	150
SMBVR	ADLR	TEM_L1_5_EM_slices15to270 135	700
SMBVR	ADLR	TEM_L1_5_EM_slices15to270 136	257
SMBVR	ADLR	TEM_L1_5_EM_slices15to270 136	44
SMBVR	ADLR	TEM_L1_5_EM_slices15to270 136	569
SMBVR	ADLR	TEM_L1_5_EM_slices15to270 137	291
SMBVR	ADLR	TEM_L1_5_EM_slices15to270 137	548
SMBVR	ADLR	TEM_L1_5_EM_slices15to270 138	194
SMBVR	ADLR	TEM_L1_5_EM_slices15to270 138	197
SMBVR	ADLR	TEM_L1_5_EM_slices15to270 138	489
SMBVR	ADLR	TEM_L1_5_EM_slices15to270 139	68
SMBVR	ADLR	TEM_L1_5_EM_slices15to270 139	345
SMBVR	ADLR	TEM_L1_5_EM_slices15to270 139	425
SMBVR	ADLR	TEM_L1_5_EM_slices15to270 140	326
SMBVR	ADLR	TEM_L1_5_EM_slices15to270 140	198
SMBVR	ADLR	TEM_L1_5_EM_slices15to270 140	122
SMBVR	ADLR	TEM_L1_5_EM_slices15to270 141	279
SMBVR	ADLR	TEM_L1_5_EM_slices15to270 141	76
SMBVR	ADLR	TEM_L1_5_EM_slices15to270 141	124
URYDR	ADLR	TEM_L1_5_EM_slices15to270 111	183
URYVR	ADLR	TEM_L1_5_EM_slices15to270 126	91
URYVR	ADLR	TEM_L1_5_EM_slices15to270 128	118
URYVR	ADLR	TEM_L1_5_EM_slices15to270 129	88
AFDR	AFDL	TEM_L1_5_EM_slices15to270 91	150
AFDR	AFDL	TEM_L1_5_EM_slices15to270 94	295
AFDR	AFDL	TEM_L1_5_EM_slices15to270 95	261
AFDR	AFDL	TEM_L1_5_EM_slices15to270 96	276
AFDR	AFDL	TEM_L1_5_EM_slices15to270 97	202
AFDR	AFDL	TEM_L1_5_EM_slices15to270 98	132
AIBL	AFDL	TEM_L1_5_EM_slices15to270 172	81
AIBL	AFDL	TEM_L1_5_EM_slices15to270 173	74
AIBL	AFDL	TEM_L1_5_EM_slices15to270 174	160
AIBL	AFDL	TEM_L1_5_EM_slices15to270 175	188
AIBL	AFDL	TEM_L1_5_EM_slices15to270 176	178
AIBL	AFDL	TEM_L1_5_EM_slices15to270 177	139
AIBL	AFDL	TEM_L1_5_EM_slices15to270 178	93
AIBL	AFDL	TEM_L1_5_EM_slices15to270 179	89
AIBL	AFDL	TEM_L1_5_EM_slices15to270 180	86
AIBL	AFDL	TEM_L1_5_EM_slices15to270 181	91
AIBL	AFDL	TEM_L1_5_EM_slices15to270 182	89
AIBL	AFDL	TEM_L1_5_EM_slices15to270 183	76
AIBL	AFDL	TEM_L1_5_EM_slices15to270 184	60
AIBL	AFDL	TEM_L1_5_EM_slices15to270 185	56
AIBL	AFDL	TEM_L1_5_EM_slices15to270 186	30
AIBL	AFDL	TEM_L1_5_EM_slices15to270 187	27
AIBL	AFDL	TEM_L1_5_EM_slices15to270 190	53
AIBL	AFDL	TEM_L1_5_EM_slices15to270 191	48
AIBL	AFDL	TEM_L1_5_EM_slices15to270 193	144
AINR	AFDL	TEM_L1_5_EM_slices15to270 90	210
AINR	AFDL	TEM_L1_5_EM_slices15to270 91	175
AINR	AFDL	TEM_L1_5_EM_slices15to270 92	188
AINR	AFDL	TEM_L1_5_EM_slices15to270 94	181
AINR	AFDL	TEM_L1_5_EM_slices15to270 95	232
AINR	AFDL	TEM_L1_5_EM_slices15to270 96	192
AINR	AFDL	TEM_L1_5_EM_slices15to270 97	230
AINR	AFDL	TEM_L1_5_EM_slices15to270 98	223
AINR	AFDL	TEM_L1_5_EM_slices15to270 99	61
AINR	AFDL	TEM_L1_5_EM_slices15to270 99	160
AINR	AFDL	TEM_L1_5_EM_slices15to270 100	66
AINR	AFDL	TEM_L1_5_EM_slices15to270 101	64
AINR	AFDL	TEM_L1_5_EM_slices15to270 102	210
AINR	AFDL	TEM_L1_5_EM_slices15to270 103	14
AINR	AFDL	TEM_L1_5_EM_slices15to270 103	277
AINR	AFDL	TEM_L1_5_EM_slices15to270 104	140
AINR	AFDL	TEM_L1_5_EM_slices15to270 104	50
AINR	AFDL	TEM_L1_5_EM_slices15to270 105	70
AINR	AFDL	TEM_L1_5_EM_slices15to270 106	114
AINR	AFDL	TEM_L1_5_EM_slices15to270 107	97
AINR	AFDL	TEM_L1_5_EM_slices15to270 107	104
AINR	AFDL	TEM_L1_5_EM_slices15to270 108	300
AINR	AFDL	TEM_L1_5_EM_slices15to270 108	115
AINR	AFDL	TEM_L1_5_EM_slices15to270 109	151
AINR	AFDL	TEM_L1_5_EM_slices15to270 110	88
AINR	AFDL	TEM_L1_5_EM_slices15to270 111	120
AINR	AFDL	TEM_L1_5_EM_slices15to270 112	159
AINR	AFDL	TEM_L1_5_EM_slices15to270 113	224
AINR	AFDL	TEM_L1_5_EM_slices15to270 113	152
AINR	AFDL	TEM_L1_5_EM_slices15to270 114	1077
AINR	AFDL	TEM_L1_5_EM_slices15to270 114	174
AINR	AFDL	TEM_L1_5_EM_slices15to270 114	129
AINR	AFDL	TEM_L1_5_EM_slices15to270 115	1104
AINR	AFDL	TEM_L1_5_EM_slices15to270 115	492
AINR	AFDL	TEM_L1_5_EM_slices15to270 116	81
AINR	AFDL	TEM_L1_5_EM_slices15to270 116	1487
AINR	AFDL	TEM_L1_5_EM_slices15to270 116	107
AINR	AFDL	TEM_L1_5_EM_slices15to270 117	162
AINR	AFDL	TEM_L1_5_EM_slices15to270 117	988
AINR	AFDL	TEM_L1_5_EM_slices15to270 118	189
AINR	AFDL	TEM_L1_5_EM_slices15to270 118	614
AINR	AFDL	TEM_L1_5_EM_slices15to270 119	270
AINR	AFDL	TEM_L1_5_EM_slices15to270 119	162
AINR	AFDL	TEM_L1_5_EM_slices15to270 120	272
AINR	AFDL	TEM_L1_5_EM_slices15to270 120	86
AINR	AFDL	TEM_L1_5_EM_slices15to270 121	388
AINR	AFDL	TEM_L1_5_EM_slices15to270 122	147
AINR	AFDL	TEM_L1_5_EM_slices15to270 123	204
AINR	AFDL	TEM_L1_5_EM_slices15to270 124	197
AINR	AFDL	TEM_L1_5_EM_slices15to270 125	235
AINR	AFDL	TEM_L1_5_EM_slices15to270 126	270
AINR	AFDL	TEM_L1_5_EM_slices15to270 127	425
AINR	AFDL	TEM_L1_5_EM_slices15to270 128	358
AINR	AFDL	TEM_L1_5_EM_slices15to270 129	351
AINR	AFDL	TEM_L1_5_EM_slices15to270 130	385
AINR	AFDL	TEM_L1_5_EM_slices15to270 131	428
AINR	AFDL	TEM_L1_5_EM_slices15to270 132	230
AINR	AFDL	TEM_L1_5_EM_slices15to270 132	122
AINR	AFDL	TEM_L1_5_EM_slices15to270 133	147
AINR	AFDL	TEM_L1_5_EM_slices15to270 137	57
AINR	AFDL	TEM_L1_5_EM_slices15to270 138	55
AINR	AFDL	TEM_L1_5_EM_slices15to270 140	87
AINR	AFDL	TEM_L1_5_EM_slices15to270 141	84
AINR	AFDL	TEM_L1_5_EM_slices15to270 142	66
AINR	AFDL	TEM_L1_5_EM_slices15to270 143	69
AINR	AFDL	TEM_L1_5_EM_slices15to270 144	60
AINR	AFDL	TEM_L1_5_EM_slices15to270 145	83
AINR	AFDL	TEM_L1_5_EM_slices15to270 148	86
AINR	AFDL	TEM_L1_5_EM_slices15to270 149	91
AINR	AFDL	TEM_L1_5_EM_slices15to270 151	121
AINR	AFDL	TEM_L1_5_EM_slices15to270 152	162
AINR	AFDL	TEM_L1_5_EM_slices15to270 153	185
AINR	AFDL	TEM_L1_5_EM_slices15to270 154	167
AINR	AFDL	TEM_L1_5_EM_slices15to270 155	186
AINR	AFDL	TEM_L1_5_EM_slices15to270 156	184
AINR	AFDL	TEM_L1_5_EM_slices15to270 157	178
AINR	AFDL	TEM_L1_5_EM_slices15to270 158	180
AINR	AFDL	TEM_L1_5_EM_slices15to270 159	177
AINR	AFDL	TEM_L1_5_EM_slices15to270 160	180
AINR	AFDL	TEM_L1_5_EM_slices15to270 161	147
AINR	AFDL	TEM_L1_5_EM_slices15to270 162	158
AINR	AFDL	TEM_L1_5_EM_slices15to270 163	159
AINR	AFDL	TEM_L1_5_EM_slices15to270 164	147
AINR	AFDL	TEM_L1_5_EM_slices15to270 165	187
AINR	AFDL	TEM_L1_5_EM_slices15to270 166	187
AINR	AFDL	TEM_L1_5_EM_slices15to270 167	162
AINR	AFDL	TEM_L1_5_EM_slices15to270 168	205
AINR	AFDL	TEM_L1_5_EM_slices15to270 169	207
AINR	AFDL	TEM_L1_5_EM_slices15to270 170	181
AINR	AFDL	TEM_L1_5_EM_slices15to270 171	168
AINR	AFDL	TEM_L1_5_EM_slices15to270 172	134
AINR	AFDL	TEM_L1_5_EM_slices15to270 173	72
AINR	AFDL	TEM_L1_5_EM_slices15to270 177	2
AINR	AFDL	TEM_L1_5_EM_slices15to270 178	80
AINR	AFDL	TEM_L1_5_EM_slices15to270 179	93
AINR	AFDL	TEM_L1_5_EM_slices15to270 180	118
AINR	AFDL	TEM_L1_5_EM_slices15to270 181	123
AINR	AFDL	TEM_L1_5_EM_slices15to270 182	158
AINR	AFDL	TEM_L1_5_EM_slices15to270 183	89
AINR	AFDL	TEM_L1_5_EM_slices15to270 184	109
AINR	AFDL	TEM_L1_5_EM_slices15to270 185	60
AINR	AFDL	TEM_L1_5_EM_slices15to270 186	2
AIYL	AFDL	TEM_L1_5_EM_slices15to270 97	99
AIYL	AFDL	TEM_L1_5_EM_slices15to270 98	149
AIYL	AFDL	TEM_L1_5_EM_slices15to270 99	302
AIYL	AFDL	TEM_L1_5_EM_slices15to270 99	183
AIYL	AFDL	TEM_L1_5_EM_slices15to270 100	295
AIYL	AFDL	TEM_L1_5_EM_slices15to270 100	405
AIYL	AFDL	TEM_L1_5_EM_slices15to270 101	907
AIYL	AFDL	TEM_L1_5_EM_slices15to270 102	100
AIYL	AFDL	TEM_L1_5_EM_slices15to270 102	157
AIYL	AFDL	TEM_L1_5_EM_slices15to270 102	228
AIYL	AFDL	TEM_L1_5_EM_slices15to270 102	443
AIYL	AFDL	TEM_L1_5_EM_slices15to270 103	234
AIYL	AFDL	TEM_L1_5_EM_slices15to270 103	58
AIYL	AFDL	TEM_L1_5_EM_slices15to270 103	318
AIYL	AFDL	TEM_L1_5_EM_slices15to270 103	141
AIYL	AFDL	TEM_L1_5_EM_slices15to270 104	359
AIYL	AFDL	TEM_L1_5_EM_slices15to270 104	106
AIYL	AFDL	TEM_L1_5_EM_slices15to270 104	257
AIYL	AFDL	TEM_L1_5_EM_slices15to270 105	216
AIYL	AFDL	TEM_L1_5_EM_slices15to270 105	96
AIYL	AFDL	TEM_L1_5_EM_slices15to270 105	120
AIYL	AFDL	TEM_L1_5_EM_slices15to270 106	177
AIYL	AFDL	TEM_L1_5_EM_slices15to270 107	169
AIYL	AFDL	TEM_L1_5_EM_slices15to270 108	161
AIYL	AFDL	TEM_L1_5_EM_slices15to270 109	164
AIYL	AFDL	TEM_L1_5_EM_slices15to270 110	159
AIYL	AFDL	TEM_L1_5_EM_slices15to270 111	188
AIYL	AFDL	TEM_L1_5_EM_slices15to270 112	60
AIYL	AFDL	TEM_L1_5_EM_slices15to270 113	88
AIYL	AFDL	TEM_L1_5_EM_slices15to270 114	254
AIYL	AFDL	TEM_L1_5_EM_slices15to270 114	293
AIYL	AFDL	TEM_L1_5_EM_slices15to270 115	409
AIYL	AFDL	TEM_L1_5_EM_slices15to270 115	143
AIYL	AFDL	TEM_L1_5_EM_slices15to270 116	864
AIYL	AFDL	TEM_L1_5_EM_slices15to270 117	1038
AIYL	AFDL	TEM_L1_5_EM_slices15to270 118	836
AIYL	AFDL	TEM_L1_5_EM_slices15to270 119	386
AIYL	AFDL	TEM_L1_5_EM_slices15to270 119	93
AIYL	AFDL	TEM_L1_5_EM_slices15to270 120	78
AIYL	AFDL	TEM_L1_5_EM_slices15to270 120	362
AIYL	AFDL	TEM_L1_5_EM_slices15to270 120	163
AIYL	AFDL	TEM_L1_5_EM_slices15to270 121	158
AIYL	AFDL	TEM_L1_5_EM_slices15to270 121	109
AIYL	AFDL	TEM_L1_5_EM_slices15to270 122	6
AIYL	AFDL	TEM_L1_5_EM_slices15to270 122	267
AIYL	AFDL	TEM_L1_5_EM_slices15to270 131	82
AIYL	AFDL	TEM_L1_5_EM_slices15to270 132	84
AIYL	AFDL	TEM_L1_5_EM_slices15to270 133	86
AIYL	AFDL	TEM_L1_5_EM_slices15to270 134	32
AIYL	AFDL	TEM_L1_5_EM_slices15to270 136	163
AIYL	AFDL	TEM_L1_5_EM_slices15to270 136	59
AIYL	AFDL	TEM_L1_5_EM_slices15to270 137	96
AIYL	AFDL	TEM_L1_5_EM_slices15to270 137	91
AIYL	AFDL	TEM_L1_5_EM_slices15to270 137	65
AIYL	AFDL	TEM_L1_5_EM_slices15to270 138	62
AIYL	AFDL	TEM_L1_5_EM_slices15to270 139	64
AIYL	AFDL	TEM_L1_5_EM_slices15to270 140	49
AIYL	AFDL	TEM_L1_5_EM_slices15to270 141	64
AIYL	AFDL	TEM_L1_5_EM_slices15to270 142	53
AIYL	AFDL	TEM_L1_5_EM_slices15to270 143	39
AIYL	AFDL	TEM_L1_5_EM_slices15to270 144	58
AIYL	AFDL	TEM_L1_5_EM_slices15to270 145	91
AIYL	AFDL	TEM_L1_5_EM_slices15to270 148	86
AIYL	AFDL	TEM_L1_5_EM_slices15to270 149	123
AIYL	AFDL	TEM_L1_5_EM_slices15to270 151	124
AIYL	AFDL	TEM_L1_5_EM_slices15to270 152	206
AIYL	AFDL	TEM_L1_5_EM_slices15to270 153	236
AIYL	AFDL	TEM_L1_5_EM_slices15to270 154	250
AIYL	AFDL	TEM_L1_5_EM_slices15to270 155	268
AIYL	AFDL	TEM_L1_5_EM_slices15to270 156	278
AIYL	AFDL	TEM_L1_5_EM_slices15to270 157	254
AIYL	AFDL	TEM_L1_5_EM_slices15to270 158	255
AIYL	AFDL	TEM_L1_5_EM_slices15to270 159	270
AIYL	AFDL	TEM_L1_5_EM_slices15to270 160	276
AIYL	AFDL	TEM_L1_5_EM_slices15to270 161	240
AIYL	AFDL	TEM_L1_5_EM_slices15to270 162	287
AIYL	AFDL	TEM_L1_5_EM_slices15to270 163	246
AIYL	AFDL	TEM_L1_5_EM_slices15to270 164	237
AIYL	AFDL	TEM_L1_5_EM_slices15to270 165	218
AIYL	AFDL	TEM_L1_5_EM_slices15to270 166	230
AIYL	AFDL	TEM_L1_5_EM_slices15to270 167	166
AIYL	AFDL	TEM_L1_5_EM_slices15to270 168	225
AIYL	AFDL	TEM_L1_5_EM_slices15to270 169	245
AIYL	AFDL	TEM_L1_5_EM_slices15to270 170	250
AIYL	AFDL	TEM_L1_5_EM_slices15to270 171	244
AIYL	AFDL	TEM_L1_5_EM_slices15to270 172	228
AIYL	AFDL	TEM_L1_5_EM_slices15to270 173	201
AIYL	AFDL	TEM_L1_5_EM_slices15to270 174	151
AIYL	AFDL	TEM_L1_5_EM_slices15to270 175	223
AIYL	AFDL	TEM_L1_5_EM_slices15to270 176	183
AIYL	AFDL	TEM_L1_5_EM_slices15to270 177	165
AIYL	AFDL	TEM_L1_5_EM_slices15to270 178	157
AIYL	AFDL	TEM_L1_5_EM_slices15to270 179	151
AIYL	AFDL	TEM_L1_5_EM_slices15to270 180	152
AIYL	AFDL	TEM_L1_5_EM_slices15to270 181	149
AIYL	AFDL	TEM_L1_5_EM_slices15to270 182	144
AIYL	AFDL	TEM_L1_5_EM_slices15to270 183	140
AIYL	AFDL	TEM_L1_5_EM_slices15to270 184	137
AIYL	AFDL	TEM_L1_5_EM_slices15to270 185	114
AIYL	AFDL	TEM_L1_5_EM_slices15to270 186	98
AIYL	AFDL	TEM_L1_5_EM_slices15to270 187	96
AIYL	AFDL	TEM_L1_5_EM_slices15to270 190	71
AIYR	AFDL	TEM_L1_5_EM_slices15to270 94	18
AIYR	AFDL	TEM_L1_5_EM_slices15to270 95	71
AIYR	AFDL	TEM_L1_5_EM_slices15to270 96	105
AIYR	AFDL	TEM_L1_5_EM_slices15to270 97	59
AIZL	AFDL	TEM_L1_5_EM_slices15to270 102	66
AIZL	AFDL	TEM_L1_5_EM_slices15to270 103	102
AIZL	AFDL	TEM_L1_5_EM_slices15to270 104	80
AIZL	AFDL	TEM_L1_5_EM_slices15to270 106	72
AIZL	AFDL	TEM_L1_5_EM_slices15to270 106	35
AIZL	AFDL	TEM_L1_5_EM_slices15to270 107	128
AIZL	AFDL	TEM_L1_5_EM_slices15to270 108	72
AIZL	AFDL	TEM_L1_5_EM_slices15to270 112	148
AIZL	AFDL	TEM_L1_5_EM_slices15to270 113	159
AIZL	AFDL	TEM_L1_5_EM_slices15to270 114	156
AIZL	AFDL	TEM_L1_5_EM_slices15to270 115	86
AIZL	AFDL	TEM_L1_5_EM_slices15to270 115	179
AIZL	AFDL	TEM_L1_5_EM_slices15to270 116	297
AIZL	AFDL	TEM_L1_5_EM_slices15to270 117	25
AIZL	AFDL	TEM_L1_5_EM_slices15to270 118	150
AIZL	AFDL	TEM_L1_5_EM_slices15to270 119	221
AIZL	AFDL	TEM_L1_5_EM_slices15to270 120	231
AIZL	AFDL	TEM_L1_5_EM_slices15to270 120	102
AIZL	AFDL	TEM_L1_5_EM_slices15to270 121	181
[truncated: 61,880 more rows]
