# Supplementary material for: Exploring neurodevelopment via spatiotemporal collation of anatomical networks with NeuroSC
Source: eLife. 2025 Oct 21;13:RP103977. doi: 10.7554/eLife.103977 (PMC12539806; doi:10.7554/eLife.103977)
Supplement: Supplementary file 10. — Type the name of a ‘Neuron of Interest’ (NOI) in the indicated cell to filter for the summed adjacency counts for each contact partner. For each partner, there are two columns: Total number of contacts (number of EM sections NOI and partner are in contact) and Total Weights (summed number of pixels NOI and partner contacts). [file elife-103977-supp10.xlsx]

## Sheet: L2_23hr
Neuron1	Neuron2	Section	Weight				Partner	# of contacts	Total Weights			Partner	# of contacts for XXX-L	Total Weights for XXX-L	# of contacts for XXX-R	Total Weights for XXX-R
AIZL	ADAL	SEM_L2_2_4nm_EM_slices140to765_cropped 217	46		AIBL		AIAL	278	50320	Write your NOI here		ADAL	0	0	0	0
AWBL	ADAL	SEM_L2_2_4nm_EM_slices140to765_cropped 215	62				ASEL	243	34742			ADAR	0	0	0	0
AWBL	ADAL	SEM_L2_2_4nm_EM_slices140to765_cropped 216	103				AWCL	237	45562			ADEL	0	0	0	0
AWBL	ADAL	SEM_L2_2_4nm_EM_slices140to765_cropped 217	50				RIMR	215	47893			ADER	0	0	0	0
AWBL	ADAL	SEM_L2_2_4nm_EM_slices140to765_cropped 254	173				RIVL	108	8404	Write your NOI hereL		ADFL	0	0	0	0
AWBL	ADAL	SEM_L2_2_4nm_EM_slices140to765_cropped 255	181				SMDDR	126	25716	Write your NOI hereR		ADFR	0	0	0	0
AWBL	ADAL	SEM_L2_2_4nm_EM_slices140to765_cropped 256	224				AVAL	119	12946			ADLL	0	0	0	0
AWBL	ADAL	SEM_L2_2_4nm_EM_slices140to765_cropped 257	242				AINL	32	7629			ADLR	0	0	0	0
AWBL	ADAL	SEM_L2_2_4nm_EM_slices140to765_cropped 258	128				AIZR	133	25843			AFDL	0	0	0	0
AWBL	ADAL	SEM_L2_2_4nm_EM_slices140to765_cropped 259	35				RIGR	116	14301			AFDR	0	0	0	0
AWBL	ADAL	SEM_L2_2_4nm_EM_slices140to765_cropped 345	55				ASHL	121	18956			AIAL	0	0	0	0
AWBL	ADAL	SEM_L2_2_4nm_EM_slices140to765_cropped 346	63				ASER	12	1478			AIAR	0	0	0	0
AWBL	ADAL	SEM_L2_2_4nm_EM_slices140to765_cropped 347	74				ASKL	52	8675			AIBL	0	0	0	0
AWBL	ADAL	SEM_L2_2_4nm_EM_slices140to765_cropped 348	68				SMBDR	39	13390			AIBR	0	0	0	0
AWBL	ADAL	SEM_L2_2_4nm_EM_slices140to765_cropped 349	70				AVKR	113	10802			AIML	0	0	0	0
AWBL	ADAL	SEM_L2_2_4nm_EM_slices140to765_cropped 350	53				DVC	50	5252			AIMR	0	0	0	0
CEPDL	ADAL	SEM_L2_2_4nm_EM_slices140to765_cropped 182	33				ASGL	75	11769			AINL	0	0	0	0
CEPDL	ADAL	SEM_L2_2_4nm_EM_slices140to765_cropped 183	71				AVEL	135	9364			AINR	0	0	0	0
CEPDL	ADAL	SEM_L2_2_4nm_EM_slices140to765_cropped 184	82				AFDL	73	8565			AIYL	0	0	0	0
CEPDL	ADAL	SEM_L2_2_4nm_EM_slices140to765_cropped 185	121				AVBL	45	9608			AIYR	0	0	0	0
CEPDL	ADAL	SEM_L2_2_4nm_EM_slices140to765_cropped 186	97				AVKL	23	2051			AIZL	0	0	0	0
CEPDL	ADAL	SEM_L2_2_4nm_EM_slices140to765_cropped 187	10				AIBR	74	8526			AIZR	0	0	0	0
CEPDL	ADAL	SEM_L2_2_4nm_EM_slices140to765_cropped 192	106				SIADR	145	29864			ALA	0	0	0	0
CEPDL	ADAL	SEM_L2_2_4nm_EM_slices140to765_cropped 193	359				ADLL	98	9843			ALML	0	0	0	0
CEPDL	ADAL	SEM_L2_2_4nm_EM_slices140to765_cropped 194	127				SAADR	37	3253			ALMR	0	0	0	0
DVA	ADAL	SEM_L2_2_4nm_EM_slices140to765_cropped 168	138				SAADL	21	2717			ALNL	0	0	0	0
DVA	ADAL	SEM_L2_2_4nm_EM_slices140to765_cropped 169	109				BAGL	19	2802			ALNR	0	0	0	0
DVA	ADAL	SEM_L2_2_4nm_EM_slices140to765_cropped 331	96				PVT	28	6411			AQR	0	0	0	0
DVA	ADAL	SEM_L2_2_4nm_EM_slices140to765_cropped 332	138				ASIL	29	2451			ASEL	0	0	0	0
DVA	ADAL	SEM_L2_2_4nm_EM_slices140to765_cropped 333	143				AVER	21	4268			ASER	0	0	0	0
DVA	ADAL	SEM_L2_2_4nm_EM_slices140to765_cropped 334	71				RIML	16	1843			ASGL	0	0	0	0
DVA	ADAL	SEM_L2_2_4nm_EM_slices140to765_cropped 335	26				AWBL	21	2382			ASGR	0	0	0	0
DVA	ADAL	SEM_L2_2_4nm_EM_slices140to765_cropped 376	14				RICR	0	0			ASHL	0	0	0	0
DVA	ADAL	SEM_L2_2_4nm_EM_slices140to765_cropped 377	12				ADAR	16	1073			ASHR	0	0	0	0
DVA	ADAL	SEM_L2_2_4nm_EM_slices140to765_cropped 378	40				AWCR	47	9167			ASIL	0	0	0	0
DVA	ADAL	SEM_L2_2_4nm_EM_slices140to765_cropped 379	57				AINR	22	5325			ASIR	0	0	0	0
DVA	ADAL	SEM_L2_2_4nm_EM_slices140to765_cropped 380	96				URYVR	23	1879			ASJL	0	0	0	0
DVA	ADAL	SEM_L2_2_4nm_EM_slices140to765_cropped 381	75				SIBVR	23	1504			ASJR	0	0	0	0
DVA	ADAL	SEM_L2_2_4nm_EM_slices140to765_cropped 382	83				RIAR	18	1734			ASKL	0	0	0	0
DVA	ADAL	SEM_L2_2_4nm_EM_slices140to765_cropped 383	78				PVQL	8	1100			ASKR	0	0	0	0
DVA	ADAL	SEM_L2_2_4nm_EM_slices140to765_cropped 384	79				DVA	43	4418			AUAL	0	0	0	0
DVA	ADAL	SEM_L2_2_4nm_EM_slices140to765_cropped 385	66				RIBR	54	7955			AUAR	0	0	0	0
DVA	ADAL	SEM_L2_2_4nm_EM_slices140to765_cropped 386	63				AIYL	63	7363			AVAL	0	0	0	0
DVA	ADAL	SEM_L2_2_4nm_EM_slices140to765_cropped 388	57				URAVR	16	2038			AVAR	0	0	0	0
DVA	ADAL	SEM_L2_2_4nm_EM_slices140to765_cropped 389	69				AVDL	8	1843			AVBL	0	0	0	0
DVA	ADAL	SEM_L2_2_4nm_EM_slices140to765_cropped 390	60				AVL	48	14377			AVBR	0	0	0	0
DVA	ADAL	SEM_L2_2_4nm_EM_slices140to765_cropped 391	61				URYDR	16	1351			AVDL	0	0	0	0
DVA	ADAL	SEM_L2_2_4nm_EM_slices140to765_cropped 392	44				ADFR	0	0			AVDR	0	0	0	0
DVA	ADAL	SEM_L2_2_4nm_EM_slices140to765_cropped 393	38				SIBVL	11	1262			AVEL	0	0	0	0
DVA	ADAL	SEM_L2_2_4nm_EM_slices140to765_cropped 395	20				SAAVL	8	944			AVER	0	0	0	0
DVA	ADAL	SEM_L2_2_4nm_EM_slices140to765_cropped 396	63				AWBR	12	1039			AVFL	0	0	0	0
DVA	ADAL	SEM_L2_2_4nm_EM_slices140to765_cropped 397	63				RIVR	7	393			AVFR	0	0	0	0
DVA	ADAL	SEM_L2_2_4nm_EM_slices140to765_cropped 398	70				AUAR	23	2113			AVHL	0	0	0	0
DVA	ADAL	SEM_L2_2_4nm_EM_slices140to765_cropped 399	92				IL2VR	15	1448			AVHR	0	0	0	0
DVA	ADAL	SEM_L2_2_4nm_EM_slices140to765_cropped 400	81				AUAL	18	1300			AVJL	0	0	0	0
DVA	ADAL	SEM_L2_2_4nm_EM_slices140to765_cropped 403	117				AWAL	6	374			AVJR	0	0	0	0
DVA	ADAL	SEM_L2_2_4nm_EM_slices140to765_cropped 404	125				SAAVR	0	0			AVKL	0	0	0	0
DVA	ADAL	SEM_L2_2_4nm_EM_slices140to765_cropped 405	157				AVDR	14	481			AVKR	0	0	0	0
DVA	ADAL	SEM_L2_2_4nm_EM_slices140to765_cropped 406	177				OLLR	15	948			AVL	0	0	0	0
DVA	ADAL	SEM_L2_2_4nm_EM_slices140to765_cropped 407	202				SMBVR	0	0			AVM	0	0	0	0
DVA	ADAL	SEM_L2_2_4nm_EM_slices140to765_cropped 408	211				BAGR	0	0			AWAL	0	0	0	0
DVA	ADAL	SEM_L2_2_4nm_EM_slices140to765_cropped 409	194				SIBDL	14	2376			AWAR	0	0	0	0
DVA	ADAL	SEM_L2_2_4nm_EM_slices140to765_cropped 410	173				RMGR	14	1936			AWBL	0	0	0	0
DVA	ADAL	SEM_L2_2_4nm_EM_slices140to765_cropped 411	171				ADFL	14	1710			AWBR	0	0	0	0
DVA	ADAL	SEM_L2_2_4nm_EM_slices140to765_cropped 412	165				SMDVR	12	587			AWCL	0	0	0	0
DVA	ADAL	SEM_L2_2_4nm_EM_slices140to765_cropped 413	154				IL2DR	0	0			AWCR	0	0	0	0
DVA	ADAL	SEM_L2_2_4nm_EM_slices140to765_cropped 414	152				URXL	0	0			BAGL	0	0	0	0
DVA	ADAL	SEM_L2_2_4nm_EM_slices140to765_cropped 415	133				RMEV	0	0			BAGR	0	0	0	0
DVA	ADAL	SEM_L2_2_4nm_EM_slices140to765_cropped 416	121				IL2R	1	75			BDUL	0	0	0	0
DVA	ADAL	SEM_L2_2_4nm_EM_slices140to765_cropped 417	128				RICL	1	63			BDUR	0	0	0	0
DVA	ADAL	SEM_L2_2_4nm_EM_slices140to765_cropped 418	97				AIZL	28	1821			CEPDL	0	0	0	0
DVA	ADAL	SEM_L2_2_4nm_EM_slices140to765_cropped 420	66				CEPVR	0	0			CEPDR	0	0	0	0
DVA	ADAL	SEM_L2_2_4nm_EM_slices140to765_cropped 421	72				RIGL	0	0			CEPVL	0	0	0	0
DVA	ADAL	SEM_L2_2_4nm_EM_slices140to765_cropped 422	72				IL1DL	2	28			CEPVR	0	0	0	0
DVA	ADAL	SEM_L2_2_4nm_EM_slices140to765_cropped 423	93				PVPR	13	3943			DVA	0	0	0	0
DVA	ADAL	SEM_L2_2_4nm_EM_slices140to765_cropped 424	100				RIAL	0	0			DVC	0	0	0	0
DVA	ADAL	SEM_L2_2_4nm_EM_slices140to765_cropped 425	124				IL2L	1	16			FLPL	0	0	0	0
DVA	ADAL	SEM_L2_2_4nm_EM_slices140to765_cropped 426	132				RIFL	29	970			FLPR	0	0	0	0
DVA	ADAL	SEM_L2_2_4nm_EM_slices140to765_cropped 427	149				IL1L	0	0			HSNL	0	0	0	0
DVA	ADAL	SEM_L2_2_4nm_EM_slices140to765_cropped 428	162				SIBDR	18	1058			HSNR	0	0	0	0
DVA	ADAL	SEM_L2_2_4nm_EM_slices140to765_cropped 429	166				SMDDL	7	668			IL1DL	0	0	0	0
DVA	ADAL	SEM_L2_2_4nm_EM_slices140to765_cropped 430	139				ADAL	9	835			IL1DR	0	0	0	0
DVA	ADAL	SEM_L2_2_4nm_EM_slices140to765_cropped 431	105				ADEL	0	0			IL1L	0	0	0	0
DVA	ADAL	SEM_L2_2_4nm_EM_slices140to765_cropped 432	126				ADER	0	0			IL1R	0	0	0	0
DVA	ADAL	SEM_L2_2_4nm_EM_slices140to765_cropped 433	130				ADLR	0	0			IL1VL	0	0	0	0
DVA	ADAL	SEM_L2_2_4nm_EM_slices140to765_cropped 434	126				AFDR	0	0			IL1VR	0	0	0	0
DVA	ADAL	SEM_L2_2_4nm_EM_slices140to765_cropped 435	132				AIAR	5	258			IL2DL	0	0	0	0
DVA	ADAL	SEM_L2_2_4nm_EM_slices140to765_cropped 436	142				AIBL	0	0			IL2DR	0	0	0	0
DVA	ADAL	SEM_L2_2_4nm_EM_slices140to765_cropped 437	115				AIML	0	0			IL2L	0	0	0	0
DVA	ADAL	SEM_L2_2_4nm_EM_slices140to765_cropped 438	95				AIMR	0	0			IL2R	0	0	0	0
DVA	ADAL	SEM_L2_2_4nm_EM_slices140to765_cropped 439	109				AIYR	0	0			IL2VL	0	0	0	0
DVA	ADAL	SEM_L2_2_4nm_EM_slices140to765_cropped 440	94				ALA	0	0			IL2VR	0	0	0	0
DVA	ADAL	SEM_L2_2_4nm_EM_slices140to765_cropped 441	101				ALML	0	0			OLLL	0	0	0	0
DVA	ADAL	SEM_L2_2_4nm_EM_slices140to765_cropped 442	157				ALMR	0	0			OLLR	0	0	0	0
DVA	ADAL	SEM_L2_2_4nm_EM_slices140to765_cropped 443	150				ALNL	0	0			OLQDL	0	0	0	0
DVA	ADAL	SEM_L2_2_4nm_EM_slices140to765_cropped 444	128				ALNR	0	0			OLQDR	0	0	0	0
DVA	ADAL	SEM_L2_2_4nm_EM_slices140to765_cropped 445	55				AQR	37	5922			OLQVL	0	0	0	0
DVA	ADAL	SEM_L2_2_4nm_EM_slices140to765_cropped 446	52				ASGR	0	0			OLQVR	0	0	0	0
DVA	ADAL	SEM_L2_2_4nm_EM_slices140to765_cropped 447	54				ASHR	0	0			PLNL	0	0	0	0
DVA	ADAL	SEM_L2_2_4nm_EM_slices140to765_cropped 448	73				ASIR	0	0			PLNR	0	0	0	0
DVA	ADAL	SEM_L2_2_4nm_EM_slices140to765_cropped 449	58				ASJL	0	0			PVCL	0	0	0	0
DVA	ADAL	SEM_L2_2_4nm_EM_slices140to765_cropped 450	110				ASJR	0	0			PVCR	0	0	0	0
DVA	ADAL	SEM_L2_2_4nm_EM_slices140to765_cropped 451	96				ASKR	0	0			PVNL	0	0	0	0
DVA	ADAL	SEM_L2_2_4nm_EM_slices140to765_cropped 452	108				AVAR	28	3775			PVNR	0	0	0	0
DVA	ADAL	SEM_L2_2_4nm_EM_slices140to765_cropped 453	120				AVBR	0	0			PVPL	0	0	0	0
DVA	ADAL	SEM_L2_2_4nm_EM_slices140to765_cropped 454	65				AVFL	0	0			PVPR	0	0	0	0
DVA	ADAL	SEM_L2_2_4nm_EM_slices140to765_cropped 455	70				AVFR	0	0			PVQL	0	0	0	0
DVA	ADAL	SEM_L2_2_4nm_EM_slices140to765_cropped 456	72				AVHL	0	0			PVQR	0	0	0	0
DVA	ADAL	SEM_L2_2_4nm_EM_slices140to765_cropped 457	67				AVHR	0	0			PVR	0	0	0	0
DVA	ADAL	SEM_L2_2_4nm_EM_slices140to765_cropped 458	48				AVJL	0	0			PVT	0	0	0	0
OLQVL	ADAL	SEM_L2_2_4nm_EM_slices140to765_cropped 243	258				AVJR	0	0			RIAL	0	0	0	0
OLQVL	ADAL	SEM_L2_2_4nm_EM_slices140to765_cropped 244	243				AVM	0	0			RIAR	0	0	0	0
OLQVL	ADAL	SEM_L2_2_4nm_EM_slices140to765_cropped 245	70				AWAR	0	0			RIBL	0	0	0	0
OLQVL	ADAL	SEM_L2_2_4nm_EM_slices140to765_cropped 246	107				BDUL	0	0			RIBR	0	0	0	0
OLQVL	ADAL	SEM_L2_2_4nm_EM_slices140to765_cropped 247	68				BDUR	0	0			RICL	0	0	0	0
OLQVL	ADAL	SEM_L2_2_4nm_EM_slices140to765_cropped 248	42				CEPDL	0	0			RICR	0	0	0	0
OLQVL	ADAL	SEM_L2_2_4nm_EM_slices140to765_cropped 249	76				CEPDR	0	0			RID	0	0	0	0
OLQVL	ADAL	SEM_L2_2_4nm_EM_slices140to765_cropped 250	60				CEPVL	0	0			RIFL	0	0	0	0
OLQVL	ADAL	SEM_L2_2_4nm_EM_slices140to765_cropped 251	40				FLPL	11	619			RIFR	0	0	0	0
OLQVL	ADAL	SEM_L2_2_4nm_EM_slices140to765_cropped 252	42				FLPR	0	0			RIGL	0	0	0	0
OLQVL	ADAL	SEM_L2_2_4nm_EM_slices140to765_cropped 253	28				HSNL	0	0			RIGR	0	0	0	0
OLQVL	ADAL	SEM_L2_2_4nm_EM_slices140to765_cropped 254	62				HSNR	0	0			RIH	0	0	0	0
OLQVL	ADAL	SEM_L2_2_4nm_EM_slices140to765_cropped 255	22				IL1DR	0	0			RIML	0	0	0	0
OLQVL	ADAL	SEM_L2_2_4nm_EM_slices140to765_cropped 256	46				IL1R	0	0			RIMR	0	0	0	0
OLQVL	ADAL	SEM_L2_2_4nm_EM_slices140to765_cropped 257	14				IL1VL	0	0			RIPL	0	0	0	0
OLQVL	ADAL	SEM_L2_2_4nm_EM_slices140to765_cropped 258	20				IL1VR	14	1121			RIPR	0	0	0	0
OLQVL	ADAL	SEM_L2_2_4nm_EM_slices140to765_cropped 259	20				IL2DL	2	27			RIR	0	0	0	0
OLQVL	ADAL	SEM_L2_2_4nm_EM_slices140to765_cropped 260	32				IL2VL	0	0			RIS	0	0	0	0
OLQVL	ADAL	SEM_L2_2_4nm_EM_slices140to765_cropped 261	61				OLLL	0	0			RIVL	0	0	0	0
PVPL	ADAL	SEM_L2_2_4nm_EM_slices140to765_cropped 404	28				OLQDL	0	0			RIVR	0	0	0	0
PVPL	ADAL	SEM_L2_2_4nm_EM_slices140to765_cropped 405	79				OLQDR	0	0			RMDDL	0	0	0	0
PVPL	ADAL	SEM_L2_2_4nm_EM_slices140to765_cropped 406	99				OLQVL	0	0			RMDDR	0	0	0	0
PVPL	ADAL	SEM_L2_2_4nm_EM_slices140to765_cropped 407	103				OLQVR	0	0			RMDL	0	0	0	0
PVPL	ADAL	SEM_L2_2_4nm_EM_slices140to765_cropped 408	104				PLNL	0	0			RMDR	0	0	0	0
PVPL	ADAL	SEM_L2_2_4nm_EM_slices140to765_cropped 409	100				PLNR	0	0			RMDVL	0	0	0	0
PVPL	ADAL	SEM_L2_2_4nm_EM_slices140to765_cropped 410	96				PVCL	0	0			RMDVR	0	0	0	0
PVPL	ADAL	SEM_L2_2_4nm_EM_slices140to765_cropped 411	99				PVCR	2	106			RMED	0	0	0	0
PVPL	ADAL	SEM_L2_2_4nm_EM_slices140to765_cropped 412	95				PVNL	0	0			RMEL	0	0	0	0
PVPL	ADAL	SEM_L2_2_4nm_EM_slices140to765_cropped 413	93				PVNR	0	0			RMER	0	0	0	0
PVPL	ADAL	SEM_L2_2_4nm_EM_slices140to765_cropped 414	90				PVPL	0	0			RMEV	0	0	0	0
PVPL	ADAL	SEM_L2_2_4nm_EM_slices140to765_cropped 415	81				PVQR	0	0			RMFL	0	0	0	0
PVPL	ADAL	SEM_L2_2_4nm_EM_slices140to765_cropped 416	96				PVR	0	0			RMFR	0	0	0	0
PVPL	ADAL	SEM_L2_2_4nm_EM_slices140to765_cropped 417	86				RIBL	0	0			RMGL	0	0	0	0
PVPL	ADAL	SEM_L2_2_4nm_EM_slices140to765_cropped 418	85				RID	0	0			RMGR	0	0	0	0
PVPL	ADAL	SEM_L2_2_4nm_EM_slices140to765_cropped 420	51				RIFR	0	0			RMHL	0	0	0	0
PVPL	ADAL	SEM_L2_2_4nm_EM_slices140to765_cropped 421	43				RIH	0	0			RMHR	0	0	0	0
PVPL	ADAL	SEM_L2_2_4nm_EM_slices140to765_cropped 422	62				RIPL	0	0			SAADL	0	0	0	0
PVPL	ADAL	SEM_L2_2_4nm_EM_slices140to765_cropped 423	42				RIPR	0	0			SAADR	0	0	0	0
PVPL	ADAL	SEM_L2_2_4nm_EM_slices140to765_cropped 424	70				RIR	25	4205			SAAVL	0	0	0	0
PVPL	ADAL	SEM_L2_2_4nm_EM_slices140to765_cropped 425	57				RIS	101	23758			SAAVR	0	0	0	0
PVPL	ADAL	SEM_L2_2_4nm_EM_slices140to765_cropped 427	41				RMDDL	0	0			SDQL	0	0	0	0
PVPL	ADAL	SEM_L2_2_4nm_EM_slices140to765_cropped 428	31				RMDDR	0	0			SDQR	0	0	0	0
PVPL	ADAL	SEM_L2_2_4nm_EM_slices140to765_cropped 429	82				RMDL	0	0			SIADL	0	0	0	0
PVPL	ADAL	SEM_L2_2_4nm_EM_slices140to765_cropped 430	91				RMDR	0	0			SIADR	0	0	0	0
PVPL	ADAL	SEM_L2_2_4nm_EM_slices140to765_cropped 431	75				RMDVL	0	0			SIAVL	0	0	0	0
PVPL	ADAL	SEM_L2_2_4nm_EM_slices140to765_cropped 432	74				RMDVR	0	0			SIAVR	0	0	0	0
PVPL	ADAL	SEM_L2_2_4nm_EM_slices140to765_cropped 433	43				RMED	8	593			SIBDL	0	0	0	0
PVQL	ADAL	SEM_L2_2_4nm_EM_slices140to765_cropped 276	90				RMEL	0	0			SIBDR	0	0	0	0
PVQL	ADAL	SEM_L2_2_4nm_EM_slices140to765_cropped 277	88				RMER	0	0			SIBVL	0	0	0	0
PVQL	ADAL	SEM_L2_2_4nm_EM_slices140to765_cropped 278	75				RMFL	0	0			SIBVR	0	0	0	0
PVQL	ADAL	SEM_L2_2_4nm_EM_slices140to765_cropped 279	114				RMFR	0	0			SMBDL	0	0	0	0
PVQL	ADAL	SEM_L2_2_4nm_EM_slices140to765_cropped 280	346				RMGL	0	0			SMBDR	0	0	0	0
PVQL	ADAL	SEM_L2_2_4nm_EM_slices140to765_cropped 281	303				RMHL	0	0			SMBVL	0	0	0	0
PVQL	ADAL	SEM_L2_2_4nm_EM_slices140to765_cropped 281	45				RMHR	7	585			SMBVR	0	0	0	0
PVQL	ADAL	SEM_L2_2_4nm_EM_slices140to765_cropped 282	267				SDQL	0	0			SMDDL	0	0	0	0
PVQL	ADAL	SEM_L2_2_4nm_EM_slices140to765_cropped 282	93				SDQR	0	0			SMDDR	0	0	0	0
PVQL	ADAL	SEM_L2_2_4nm_EM_slices140to765_cropped 283	360				SIADL	0	0			SMDVL	0	0	0	0
PVQL	ADAL	SEM_L2_2_4nm_EM_slices140to765_cropped 284	119				SIAVL	0	0			SMDVR	0	0	0	0
RICL	ADAL	SEM_L2_2_4nm_EM_slices140to765_cropped 153	83				SIAVR	10	664			URADL	0	0	0	0
RICL	ADAL	SEM_L2_2_4nm_EM_slices140to765_cropped 154	256				SMBDL	0	0			URADR	0	0	0	0
RICL	ADAL	SEM_L2_2_4nm_EM_slices140to765_cropped 154	191				SMBVL	0	0			URAVL	0	0	0	0
RICL	ADAL	SEM_L2_2_4nm_EM_slices140to765_cropped 155	184				SMDVL	0	0			URAVR	0	0	0	0
RICL	ADAL	SEM_L2_2_4nm_EM_slices140to765_cropped 155	65				URADL	0	0			URBL	0	0	0	0
RICL	ADAL	SEM_L2_2_4nm_EM_slices140to765_cropped 156	224				URADR	0	0			URBR	0	0	0	0
RICL	ADAL	SEM_L2_2_4nm_EM_slices140to765_cropped 156	89				URAVL	0	0			URXL	0	0	0	0
RICL	ADAL	SEM_L2_2_4nm_EM_slices140to765_cropped 157	264				URBL	0	0			URXR	0	0	0	0
RICL	ADAL	SEM_L2_2_4nm_EM_slices140to765_cropped 157	85				URBR	0	0			URYDL	0	0	0	0
RICL	ADAL	SEM_L2_2_4nm_EM_slices140to765_cropped 158	255				URXR	0	0			URYDR	0	0	0	0
RICL	ADAL	SEM_L2_2_4nm_EM_slices140to765_cropped 158	75				URYDL	0	0			URYVL	0	0	0	0
RICL	ADAL	SEM_L2_2_4nm_EM_slices140to765_cropped 159	124				URYVL	0	0			URYVR	0	0	0	0
RICL	ADAL	SEM_L2_2_4nm_EM_slices140to765_cropped 159	230				VB01	0	0			VB01	0	0	0	0
RICL	ADAL	SEM_L2_2_4nm_EM_slices140to765_cropped 160	225
RICL	ADAL	SEM_L2_2_4nm_EM_slices140to765_cropped 160	82
RICL	ADAL	SEM_L2_2_4nm_EM_slices140to765_cropped 161	137
RICL	ADAL	SEM_L2_2_4nm_EM_slices140to765_cropped 162	106
RICL	ADAL	SEM_L2_2_4nm_EM_slices140to765_cropped 162	12
RICL	ADAL	SEM_L2_2_4nm_EM_slices140to765_cropped 163	219
RICL	ADAL	SEM_L2_2_4nm_EM_slices140to765_cropped 164	220
RICL	ADAL	SEM_L2_2_4nm_EM_slices140to765_cropped 165	160
RICL	ADAL	SEM_L2_2_4nm_EM_slices140to765_cropped 166	36
RICL	ADAL	SEM_L2_2_4nm_EM_slices140to765_cropped 179	47
RICL	ADAL	SEM_L2_2_4nm_EM_slices140to765_cropped 180	65
RICL	ADAL	SEM_L2_2_4nm_EM_slices140to765_cropped 181	70
RICL	ADAL	SEM_L2_2_4nm_EM_slices140to765_cropped 182	51
RICL	ADAL	SEM_L2_2_4nm_EM_slices140to765_cropped 183	45
RICL	ADAL	SEM_L2_2_4nm_EM_slices140to765_cropped 184	61
RICL	ADAL	SEM_L2_2_4nm_EM_slices140to765_cropped 185	70
RICL	ADAL	SEM_L2_2_4nm_EM_slices140to765_cropped 186	50
RICL	ADAL	SEM_L2_2_4nm_EM_slices140to765_cropped 187	196
RICL	ADAL	SEM_L2_2_4nm_EM_slices140to765_cropped 188	151
RICL	ADAL	SEM_L2_2_4nm_EM_slices140to765_cropped 189	210
RICL	ADAL	SEM_L2_2_4nm_EM_slices140to765_cropped 194	4
RICL	ADAL	SEM_L2_2_4nm_EM_slices140to765_cropped 195	41
RICL	ADAL	SEM_L2_2_4nm_EM_slices140to765_cropped 197	50
RICL	ADAL	SEM_L2_2_4nm_EM_slices140to765_cropped 198	65
RICL	ADAL	SEM_L2_2_4nm_EM_slices140to765_cropped 198	65
RICL	ADAL	SEM_L2_2_4nm_EM_slices140to765_cropped 199	59
RICL	ADAL	SEM_L2_2_4nm_EM_slices140to765_cropped 199	67
RICL	ADAL	SEM_L2_2_4nm_EM_slices140to765_cropped 200	128
RICL	ADAL	SEM_L2_2_4nm_EM_slices140to765_cropped 200	202
RICL	ADAL	SEM_L2_2_4nm_EM_slices140to765_cropped 201	177
RICL	ADAL	SEM_L2_2_4nm_EM_slices140to765_cropped 202	96
RICL	ADAL	SEM_L2_2_4nm_EM_slices140to765_cropped 203	63
RIVR	ADAL	SEM_L2_2_4nm_EM_slices140to765_cropped 162	106
RIVR	ADAL	SEM_L2_2_4nm_EM_slices140to765_cropped 163	91
RIVR	ADAL	SEM_L2_2_4nm_EM_slices140to765_cropped 164	81
RIVR	ADAL	SEM_L2_2_4nm_EM_slices140to765_cropped 165	84
RIVR	ADAL	SEM_L2_2_4nm_EM_slices140to765_cropped 166	144
RIVR	ADAL	SEM_L2_2_4nm_EM_slices140to765_cropped 167	128
RIVR	ADAL	SEM_L2_2_4nm_EM_slices140to765_cropped 168	116
RIVR	ADAL	SEM_L2_2_4nm_EM_slices140to765_cropped 169	152
RIVR	ADAL	SEM_L2_2_4nm_EM_slices140to765_cropped 170	140
RIVR	ADAL	SEM_L2_2_4nm_EM_slices140to765_cropped 171	133
RIVR	ADAL	SEM_L2_2_4nm_EM_slices140to765_cropped 172	99
RIVR	ADAL	SEM_L2_2_4nm_EM_slices140to765_cropped 173	72
RIVR	ADAL	SEM_L2_2_4nm_EM_slices140to765_cropped 375	82
RIVR	ADAL	SEM_L2_2_4nm_EM_slices140to765_cropped 376	77
RIVR	ADAL	SEM_L2_2_4nm_EM_slices140to765_cropped 377	44
RIVR	ADAL	SEM_L2_2_4nm_EM_slices140to765_cropped 378	58
RIVR	ADAL	SEM_L2_2_4nm_EM_slices140to765_cropped 379	62
RIVR	ADAL	SEM_L2_2_4nm_EM_slices140to765_cropped 380	75
RIVR	ADAL	SEM_L2_2_4nm_EM_slices140to765_cropped 381	59
RIVR	ADAL	SEM_L2_2_4nm_EM_slices140to765_cropped 382	63
RIVR	ADAL	SEM_L2_2_4nm_EM_slices140to765_cropped 383	58
RIVR	ADAL	SEM_L2_2_4nm_EM_slices140to765_cropped 384	55
RIVR	ADAL	SEM_L2_2_4nm_EM_slices140to765_cropped 385	19
RIVR	ADAL	SEM_L2_2_4nm_EM_slices140to765_cropped 386	31
RIVR	ADAL	SEM_L2_2_4nm_EM_slices140to765_cropped 387	48
RIVR	ADAL	SEM_L2_2_4nm_EM_slices140to765_cropped 388	55
RIVR	ADAL	SEM_L2_2_4nm_EM_slices140to765_cropped 389	73
RIVR	ADAL	SEM_L2_2_4nm_EM_slices140to765_cropped 390	75
RIVR	ADAL	SEM_L2_2_4nm_EM_slices140to765_cropped 391	59
RIVR	ADAL	SEM_L2_2_4nm_EM_slices140to765_cropped 392	73
RIVR	ADAL	SEM_L2_2_4nm_EM_slices140to765_cropped 393	59
SDQL	ADAL	SEM_L2_2_4nm_EM_slices140to765_cropped 254	137
SDQL	ADAL	SEM_L2_2_4nm_EM_slices140to765_cropped 255	201
SDQL	ADAL	SEM_L2_2_4nm_EM_slices140to765_cropped 256	225
SDQL	ADAL	SEM_L2_2_4nm_EM_slices140to765_cropped 257	268
SDQL	ADAL	SEM_L2_2_4nm_EM_slices140to765_cropped 258	224
SDQL	ADAL	SEM_L2_2_4nm_EM_slices140to765_cropped 259	196
SIADR	ADAL	SEM_L2_2_4nm_EM_slices140to765_cropped 188	59
SIADR	ADAL	SEM_L2_2_4nm_EM_slices140to765_cropped 189	120
SIADR	ADAL	SEM_L2_2_4nm_EM_slices140to765_cropped 190	158
SIADR	ADAL	SEM_L2_2_4nm_EM_slices140to765_cropped 191	142
SIADR	ADAL	SEM_L2_2_4nm_EM_slices140to765_cropped 192	39
SIADR	ADAL	SEM_L2_2_4nm_EM_slices140to765_cropped 193	26
SIADR	ADAL	SEM_L2_2_4nm_EM_slices140to765_cropped 194	35
SIADR	ADAL	SEM_L2_2_4nm_EM_slices140to765_cropped 195	48
SIADR	ADAL	SEM_L2_2_4nm_EM_slices140to765_cropped 196	32
SIADR	ADAL	SEM_L2_2_4nm_EM_slices140to765_cropped 197	39
SIADR	ADAL	SEM_L2_2_4nm_EM_slices140to765_cropped 198	35
SIADR	ADAL	SEM_L2_2_4nm_EM_slices140to765_cropped 199	38
SIADR	ADAL	SEM_L2_2_4nm_EM_slices140to765_cropped 200	18
SIADR	ADAL	SEM_L2_2_4nm_EM_slices140to765_cropped 201	2
SIADR	ADAL	SEM_L2_2_4nm_EM_slices140to765_cropped 207	21
SIADR	ADAL	SEM_L2_2_4nm_EM_slices140to765_cropped 208	20
SIADR	ADAL	SEM_L2_2_4nm_EM_slices140to765_cropped 209	61
SIADR	ADAL	SEM_L2_2_4nm_EM_slices140to765_cropped 210	33
SIADR	ADAL	SEM_L2_2_4nm_EM_slices140to765_cropped 211	46
SIADR	ADAL	SEM_L2_2_4nm_EM_slices140to765_cropped 212	38
SIADR	ADAL	SEM_L2_2_4nm_EM_slices140to765_cropped 213	64
SIADR	ADAL	SEM_L2_2_4nm_EM_slices140to765_cropped 214	44
SIADR	ADAL	SEM_L2_2_4nm_EM_slices140to765_cropped 215	76
SIADR	ADAL	SEM_L2_2_4nm_EM_slices140to765_cropped 216	48
ASHR	ADAR	SEM_L2_2_4nm_EM_slices140to765_cropped 213	40
ASHR	ADAR	SEM_L2_2_4nm_EM_slices140to765_cropped 214	135
ASHR	ADAR	SEM_L2_2_4nm_EM_slices140to765_cropped 215	149
ASHR	ADAR	SEM_L2_2_4nm_EM_slices140to765_cropped 216	159
ASHR	ADAR	SEM_L2_2_4nm_EM_slices140to765_cropped 217	196
ASHR	ADAR	SEM_L2_2_4nm_EM_slices140to765_cropped 218	160
ASHR	ADAR	SEM_L2_2_4nm_EM_slices140to765_cropped 218	362
ASHR	ADAR	SEM_L2_2_4nm_EM_slices140to765_cropped 219	137
ASHR	ADAR	SEM_L2_2_4nm_EM_slices140to765_cropped 219	437
ASHR	ADAR	SEM_L2_2_4nm_EM_slices140to765_cropped 220	113
ASHR	ADAR	SEM_L2_2_4nm_EM_slices140to765_cropped 220	481
ASHR	ADAR	SEM_L2_2_4nm_EM_slices140to765_cropped 221	68
ASHR	ADAR	SEM_L2_2_4nm_EM_slices140to765_cropped 221	518
ASHR	ADAR	SEM_L2_2_4nm_EM_slices140to765_cropped 222	563
ASHR	ADAR	SEM_L2_2_4nm_EM_slices140to765_cropped 223	485
ASHR	ADAR	SEM_L2_2_4nm_EM_slices140to765_cropped 224	491
ASHR	ADAR	SEM_L2_2_4nm_EM_slices140to765_cropped 226	463
ASHR	ADAR	SEM_L2_2_4nm_EM_slices140to765_cropped 227	501
ASHR	ADAR	SEM_L2_2_4nm_EM_slices140to765_cropped 228	507
ASHR	ADAR	SEM_L2_2_4nm_EM_slices140to765_cropped 229	521
ASHR	ADAR	SEM_L2_2_4nm_EM_slices140to765_cropped 230	527
ASHR	ADAR	SEM_L2_2_4nm_EM_slices140to765_cropped 231	554
ASHR	ADAR	SEM_L2_2_4nm_EM_slices140to765_cropped 232	557
ASHR	ADAR	SEM_L2_2_4nm_EM_slices140to765_cropped 233	570
ASHR	ADAR	SEM_L2_2_4nm_EM_slices140to765_cropped 234	601
ASHR	ADAR	SEM_L2_2_4nm_EM_slices140to765_cropped 235	601
ASHR	ADAR	SEM_L2_2_4nm_EM_slices140to765_cropped 236	603
ASHR	ADAR	SEM_L2_2_4nm_EM_slices140to765_cropped 237	610
ASHR	ADAR	SEM_L2_2_4nm_EM_slices140to765_cropped 238	592
ASHR	ADAR	SEM_L2_2_4nm_EM_slices140to765_cropped 239	478
ASHR	ADAR	SEM_L2_2_4nm_EM_slices140to765_cropped 240	264
ASHR	ADAR	SEM_L2_2_4nm_EM_slices140to765_cropped 241	179
ASHR	ADAR	SEM_L2_2_4nm_EM_slices140to765_cropped 242	177
ASHR	ADAR	SEM_L2_2_4nm_EM_slices140to765_cropped 243	139
ASHR	ADAR	SEM_L2_2_4nm_EM_slices140to765_cropped 244	101
ASHR	ADAR	SEM_L2_2_4nm_EM_slices140to765_cropped 245	97
ASHR	ADAR	SEM_L2_2_4nm_EM_slices140to765_cropped 246	99
ASHR	ADAR	SEM_L2_2_4nm_EM_slices140to765_cropped 247	89
ASHR	ADAR	SEM_L2_2_4nm_EM_slices140to765_cropped 248	101
ASHR	ADAR	SEM_L2_2_4nm_EM_slices140to765_cropped 249	152
ASHR	ADAR	SEM_L2_2_4nm_EM_slices140to765_cropped 250	174
ASHR	ADAR	SEM_L2_2_4nm_EM_slices140to765_cropped 251	206
ASHR	ADAR	SEM_L2_2_4nm_EM_slices140to765_cropped 252	134
ASHR	ADAR	SEM_L2_2_4nm_EM_slices140to765_cropped 253	82
ASHR	ADAR	SEM_L2_2_4nm_EM_slices140to765_cropped 254	144
ASHR	ADAR	SEM_L2_2_4nm_EM_slices140to765_cropped 255	217
ASHR	ADAR	SEM_L2_2_4nm_EM_slices140to765_cropped 256	206
ASHR	ADAR	SEM_L2_2_4nm_EM_slices140to765_cropped 257	126
ASHR	ADAR	SEM_L2_2_4nm_EM_slices140to765_cropped 354	35
ASHR	ADAR	SEM_L2_2_4nm_EM_slices140to765_cropped 355	92
ASHR	ADAR	SEM_L2_2_4nm_EM_slices140to765_cropped 356	100
ASHR	ADAR	SEM_L2_2_4nm_EM_slices140to765_cropped 357	106
ASHR	ADAR	SEM_L2_2_4nm_EM_slices140to765_cropped 358	128
ASHR	ADAR	SEM_L2_2_4nm_EM_slices140to765_cropped 359	139
ASHR	ADAR	SEM_L2_2_4nm_EM_slices140to765_cropped 360	87
ASHR	ADAR	SEM_L2_2_4nm_EM_slices140to765_cropped 361	113
ASHR	ADAR	SEM_L2_2_4nm_EM_slices140to765_cropped 362	106
ASHR	ADAR	SEM_L2_2_4nm_EM_slices140to765_cropped 362	162
ASHR	ADAR	SEM_L2_2_4nm_EM_slices140to765_cropped 363	115
ASHR	ADAR	SEM_L2_2_4nm_EM_slices140to765_cropped 363	132
ASHR	ADAR	SEM_L2_2_4nm_EM_slices140to765_cropped 364	85
ASHR	ADAR	SEM_L2_2_4nm_EM_slices140to765_cropped 364	130
ASHR	ADAR	SEM_L2_2_4nm_EM_slices140to765_cropped 365	125
ASHR	ADAR	SEM_L2_2_4nm_EM_slices140to765_cropped 365	189
ASHR	ADAR	SEM_L2_2_4nm_EM_slices140to765_cropped 366	113
ASHR	ADAR	SEM_L2_2_4nm_EM_slices140to765_cropped 366	118
ASHR	ADAR	SEM_L2_2_4nm_EM_slices140to765_cropped 367	189
ASHR	ADAR	SEM_L2_2_4nm_EM_slices140to765_cropped 368	253
ASHR	ADAR	SEM_L2_2_4nm_EM_slices140to765_cropped 369	314
ASHR	ADAR	SEM_L2_2_4nm_EM_slices140to765_cropped 370	320
ASHR	ADAR	SEM_L2_2_4nm_EM_slices140to765_cropped 371	352
ASHR	ADAR	SEM_L2_2_4nm_EM_slices140to765_cropped 372	345
ASHR	ADAR	SEM_L2_2_4nm_EM_slices140to765_cropped 373	369
ASHR	ADAR	SEM_L2_2_4nm_EM_slices140to765_cropped 374	399
ASHR	ADAR	SEM_L2_2_4nm_EM_slices140to765_cropped 375	392
ASHR	ADAR	SEM_L2_2_4nm_EM_slices140to765_cropped 376	434
ASHR	ADAR	SEM_L2_2_4nm_EM_slices140to765_cropped 377	425
ASHR	ADAR	SEM_L2_2_4nm_EM_slices140to765_cropped 378	478
ASHR	ADAR	SEM_L2_2_4nm_EM_slices140to765_cropped 379	464
ASHR	ADAR	SEM_L2_2_4nm_EM_slices140to765_cropped 380	480
ASHR	ADAR	SEM_L2_2_4nm_EM_slices140to765_cropped 381	547
ASHR	ADAR	SEM_L2_2_4nm_EM_slices140to765_cropped 382	517
ASHR	ADAR	SEM_L2_2_4nm_EM_slices140to765_cropped 383	548
ASHR	ADAR	SEM_L2_2_4nm_EM_slices140to765_cropped 384	556
ASHR	ADAR	SEM_L2_2_4nm_EM_slices140to765_cropped 385	531
ASHR	ADAR	SEM_L2_2_4nm_EM_slices140to765_cropped 386	557
ASHR	ADAR	SEM_L2_2_4nm_EM_slices140to765_cropped 387	498
ASHR	ADAR	SEM_L2_2_4nm_EM_slices140to765_cropped 388	507
ASHR	ADAR	SEM_L2_2_4nm_EM_slices140to765_cropped 389	577
ASHR	ADAR	SEM_L2_2_4nm_EM_slices140to765_cropped 390	478
ASHR	ADAR	SEM_L2_2_4nm_EM_slices140to765_cropped 391	543
ASHR	ADAR	SEM_L2_2_4nm_EM_slices140to765_cropped 392	551
ASHR	ADAR	SEM_L2_2_4nm_EM_slices140to765_cropped 393	504
ASHR	ADAR	SEM_L2_2_4nm_EM_slices140to765_cropped 394	518
ASHR	ADAR	SEM_L2_2_4nm_EM_slices140to765_cropped 395	408
ASHR	ADAR	SEM_L2_2_4nm_EM_slices140to765_cropped 396	412
ASHR	ADAR	SEM_L2_2_4nm_EM_slices140to765_cropped 397	457
ASHR	ADAR	SEM_L2_2_4nm_EM_slices140to765_cropped 398	443
ASHR	ADAR	SEM_L2_2_4nm_EM_slices140to765_cropped 399	421
ASHR	ADAR	SEM_L2_2_4nm_EM_slices140to765_cropped 400	401
ASHR	ADAR	SEM_L2_2_4nm_EM_slices140to765_cropped 401	367
ASHR	ADAR	SEM_L2_2_4nm_EM_slices140to765_cropped 402	331
ASHR	ADAR	SEM_L2_2_4nm_EM_slices140to765_cropped 404	140
ASHR	ADAR	SEM_L2_2_4nm_EM_slices140to765_cropped 405	148
ASHR	ADAR	SEM_L2_2_4nm_EM_slices140to765_cropped 406	124
ASHR	ADAR	SEM_L2_2_4nm_EM_slices140to765_cropped 407	184
ASHR	ADAR	SEM_L2_2_4nm_EM_slices140to765_cropped 408	188
ASHR	ADAR	SEM_L2_2_4nm_EM_slices140to765_cropped 409	205
ASHR	ADAR	SEM_L2_2_4nm_EM_slices140to765_cropped 410	176
ASHR	ADAR	SEM_L2_2_4nm_EM_slices140to765_cropped 411	166
ASHR	ADAR	SEM_L2_2_4nm_EM_slices140to765_cropped 412	161
ASHR	ADAR	SEM_L2_2_4nm_EM_slices140to765_cropped 413	114
ASHR	ADAR	SEM_L2_2_4nm_EM_slices140to765_cropped 414	108
ASHR	ADAR	SEM_L2_2_4nm_EM_slices140to765_cropped 415	113
ASHR	ADAR	SEM_L2_2_4nm_EM_slices140to765_cropped 416	81
ASHR	ADAR	SEM_L2_2_4nm_EM_slices140to765_cropped 417	88
AVEL	ADAR	SEM_L2_2_4nm_EM_slices140to765_cropped 422	65
AVEL	ADAR	SEM_L2_2_4nm_EM_slices140to765_cropped 423	84
AVEL	ADAR	SEM_L2_2_4nm_EM_slices140to765_cropped 424	83
AVEL	ADAR	SEM_L2_2_4nm_EM_slices140to765_cropped 425	83
AVEL	ADAR	SEM_L2_2_4nm_EM_slices140to765_cropped 441	42
AVEL	ADAR	SEM_L2_2_4nm_EM_slices140to765_cropped 442	67
AVEL	ADAR	SEM_L2_2_4nm_EM_slices140to765_cropped 443	57
AVEL	ADAR	SEM_L2_2_4nm_EM_slices140to765_cropped 444	92
AVEL	ADAR	SEM_L2_2_4nm_EM_slices140to765_cropped 445	70
AVEL	ADAR	SEM_L2_2_4nm_EM_slices140to765_cropped 446	104
AVEL	ADAR	SEM_L2_2_4nm_EM_slices140to765_cropped 447	127
AVEL	ADAR	SEM_L2_2_4nm_EM_slices140to765_cropped 448	114
AVEL	ADAR	SEM_L2_2_4nm_EM_slices140to765_cropped 449	146
AVEL	ADAR	SEM_L2_2_4nm_EM_slices140to765_cropped 450	145
AVEL	ADAR	SEM_L2_2_4nm_EM_slices140to765_cropped 451	150
AVEL	ADAR	SEM_L2_2_4nm_EM_slices140to765_cropped 452	139
AVEL	ADAR	SEM_L2_2_4nm_EM_slices140to765_cropped 453	128
AVEL	ADAR	SEM_L2_2_4nm_EM_slices140to765_cropped 454	97
AVEL	ADAR	SEM_L2_2_4nm_EM_slices140to765_cropped 455	24
DVA	ADAR	SEM_L2_2_4nm_EM_slices140to765_cropped 252	19
DVA	ADAR	SEM_L2_2_4nm_EM_slices140to765_cropped 253	16
DVA	ADAR	SEM_L2_2_4nm_EM_slices140to765_cropped 254	49
DVA	ADAR	SEM_L2_2_4nm_EM_slices140to765_cropped 255	19
DVA	ADAR	SEM_L2_2_4nm_EM_slices140to765_cropped 336	39
DVA	ADAR	SEM_L2_2_4nm_EM_slices140to765_cropped 337	46
DVA	ADAR	SEM_L2_2_4nm_EM_slices140to765_cropped 338	86
DVA	ADAR	SEM_L2_2_4nm_EM_slices140to765_cropped 339	92
DVA	ADAR	SEM_L2_2_4nm_EM_slices140to765_cropped 340	65
DVA	ADAR	SEM_L2_2_4nm_EM_slices140to765_cropped 341	81
DVA	ADAR	SEM_L2_2_4nm_EM_slices140to765_cropped 342	100
DVA	ADAR	SEM_L2_2_4nm_EM_slices140to765_cropped 343	108
DVA	ADAR	SEM_L2_2_4nm_EM_slices140to765_cropped 344	129
DVA	ADAR	SEM_L2_2_4nm_EM_slices140to765_cropped 345	129
DVA	ADAR	SEM_L2_2_4nm_EM_slices140to765_cropped 346	116
DVA	ADAR	SEM_L2_2_4nm_EM_slices140to765_cropped 347	116
DVA	ADAR	SEM_L2_2_4nm_EM_slices140to765_cropped 348	95
DVA	ADAR	SEM_L2_2_4nm_EM_slices140to765_cropped 349	96
DVA	ADAR	SEM_L2_2_4nm_EM_slices140to765_cropped 350	95
DVA	ADAR	SEM_L2_2_4nm_EM_slices140to765_cropped 351	92
DVA	ADAR	SEM_L2_2_4nm_EM_slices140to765_cropped 352	85
DVA	ADAR	SEM_L2_2_4nm_EM_slices140to765_cropped 353	184
DVA	ADAR	SEM_L2_2_4nm_EM_slices140to765_cropped 354	85
DVA	ADAR	SEM_L2_2_4nm_EM_slices140to765_cropped 355	81
DVA	ADAR	SEM_L2_2_4nm_EM_slices140to765_cropped 355	30
DVA	ADAR	SEM_L2_2_4nm_EM_slices140to765_cropped 356	41
DVA	ADAR	SEM_L2_2_4nm_EM_slices140to765_cropped 357	58
DVA	ADAR	SEM_L2_2_4nm_EM_slices140to765_cropped 357	72
DVA	ADAR	SEM_L2_2_4nm_EM_slices140to765_cropped 358	75
DVA	ADAR	SEM_L2_2_4nm_EM_slices140to765_cropped 358	93
DVA	ADAR	SEM_L2_2_4nm_EM_slices140to765_cropped 359	79
DVA	ADAR	SEM_L2_2_4nm_EM_slices140to765_cropped 359	133
DVA	ADAR	SEM_L2_2_4nm_EM_slices140to765_cropped 360	78
DVA	ADAR	SEM_L2_2_4nm_EM_slices140to765_cropped 360	186
DVA	ADAR	SEM_L2_2_4nm_EM_slices140to765_cropped 361	407
DVA	ADAR	SEM_L2_2_4nm_EM_slices140to765_cropped 362	365
DVA	ADAR	SEM_L2_2_4nm_EM_slices140to765_cropped 363	372
DVA	ADAR	SEM_L2_2_4nm_EM_slices140to765_cropped 364	367
DVA	ADAR	SEM_L2_2_4nm_EM_slices140to765_cropped 365	360
DVA	ADAR	SEM_L2_2_4nm_EM_slices140to765_cropped 366	254
DVA	ADAR	SEM_L2_2_4nm_EM_slices140to765_cropped 367	238
DVA	ADAR	SEM_L2_2_4nm_EM_slices140to765_cropped 368	238
DVA	ADAR	SEM_L2_2_4nm_EM_slices140to765_cropped 369	187
DVA	ADAR	SEM_L2_2_4nm_EM_slices140to765_cropped 370	181
DVA	ADAR	SEM_L2_2_4nm_EM_slices140to765_cropped 371	180
DVA	ADAR	SEM_L2_2_4nm_EM_slices140to765_cropped 372	144
DVA	ADAR	SEM_L2_2_4nm_EM_slices140to765_cropped 373	136
DVA	ADAR	SEM_L2_2_4nm_EM_slices140to765_cropped 374	125
DVA	ADAR	SEM_L2_2_4nm_EM_slices140to765_cropped 375	114
DVA	ADAR	SEM_L2_2_4nm_EM_slices140to765_cropped 376	103
DVA	ADAR	SEM_L2_2_4nm_EM_slices140to765_cropped 377	105
DVA	ADAR	SEM_L2_2_4nm_EM_slices140to765_cropped 378	110
DVA	ADAR	SEM_L2_2_4nm_EM_slices140to765_cropped 379	101
DVA	ADAR	SEM_L2_2_4nm_EM_slices140to765_cropped 380	96
DVA	ADAR	SEM_L2_2_4nm_EM_slices140to765_cropped 381	82
DVA	ADAR	SEM_L2_2_4nm_EM_slices140to765_cropped 382	72
DVA	ADAR	SEM_L2_2_4nm_EM_slices140to765_cropped 383	58
DVA	ADAR	SEM_L2_2_4nm_EM_slices140to765_cropped 384	54
DVA	ADAR	SEM_L2_2_4nm_EM_slices140to765_cropped 385	27
DVA	ADAR	SEM_L2_2_4nm_EM_slices140to765_cropped 386	6
DVA	ADAR	SEM_L2_2_4nm_EM_slices140to765_cropped 387	6
OLQVR	ADAR	SEM_L2_2_4nm_EM_slices140to765_cropped 210	133
OLQVR	ADAR	SEM_L2_2_4nm_EM_slices140to765_cropped 211	185
OLQVR	ADAR	SEM_L2_2_4nm_EM_slices140to765_cropped 212	205
OLQVR	ADAR	SEM_L2_2_4nm_EM_slices140to765_cropped 213	216
OLQVR	ADAR	SEM_L2_2_4nm_EM_slices140to765_cropped 214	236
OLQVR	ADAR	SEM_L2_2_4nm_EM_slices140to765_cropped 215	148
OLQVR	ADAR	SEM_L2_2_4nm_EM_slices140to765_cropped 216	100
OLQVR	ADAR	SEM_L2_2_4nm_EM_slices140to765_cropped 217	64
OLQVR	ADAR	SEM_L2_2_4nm_EM_slices140to765_cropped 218	28
OLQVR	ADAR	SEM_L2_2_4nm_EM_slices140to765_cropped 219	12
RIAR	ADAR	SEM_L2_2_4nm_EM_slices140to765_cropped 371	47
RIAR	ADAR	SEM_L2_2_4nm_EM_slices140to765_cropped 372	82
RIAR	ADAR	SEM_L2_2_4nm_EM_slices140to765_cropped 373	192
RIAR	ADAR	SEM_L2_2_4nm_EM_slices140to765_cropped 374	224
RIAR	ADAR	SEM_L2_2_4nm_EM_slices140to765_cropped 375	236
RIAR	ADAR	SEM_L2_2_4nm_EM_slices140to765_cropped 376	257
RIAR	ADAR	SEM_L2_2_4nm_EM_slices140to765_cropped 377	271
RIAR	ADAR	SEM_L2_2_4nm_EM_slices140to765_cropped 378	290
RIAR	ADAR	SEM_L2_2_4nm_EM_slices140to765_cropped 379	286
RIAR	ADAR	SEM_L2_2_4nm_EM_slices140to765_cropped 380	271
RIAR	ADAR	SEM_L2_2_4nm_EM_slices140to765_cropped 381	255
RIAR	ADAR	SEM_L2_2_4nm_EM_slices140to765_cropped 382	249
RIAR	ADAR	SEM_L2_2_4nm_EM_slices140to765_cropped 383	238
RIAR	ADAR	SEM_L2_2_4nm_EM_slices140to765_cropped 384	209
RIAR	ADAR	SEM_L2_2_4nm_EM_slices140to765_cropped 385	208
RIAR	ADAR	SEM_L2_2_4nm_EM_slices140to765_cropped 386	210
RIAR	ADAR	SEM_L2_2_4nm_EM_slices140to765_cropped 387	148
RIAR	ADAR	SEM_L2_2_4nm_EM_slices140to765_cropped 388	157
RIAR	ADAR	SEM_L2_2_4nm_EM_slices140to765_cropped 389	142
RIAR	ADAR	SEM_L2_2_4nm_EM_slices140to765_cropped 390	133
RIAR	ADAR	SEM_L2_2_4nm_EM_slices140to765_cropped 391	101
RIAR	ADAR	SEM_L2_2_4nm_EM_slices140to765_cropped 392	91
RIAR	ADAR	SEM_L2_2_4nm_EM_slices140to765_cropped 393	50
RIAR	ADAR	SEM_L2_2_4nm_EM_slices140to765_cropped 407	23
RIAR	ADAR	SEM_L2_2_4nm_EM_slices140to765_cropped 409	19
RICL	ADAR	SEM_L2_2_4nm_EM_slices140to765_cropped 210	89
RICL	ADAR	SEM_L2_2_4nm_EM_slices140to765_cropped 211	55
RICL	ADAR	SEM_L2_2_4nm_EM_slices140to765_cropped 211	22
RICL	ADAR	SEM_L2_2_4nm_EM_slices140to765_cropped 211	84
RICL	ADAR	SEM_L2_2_4nm_EM_slices140to765_cropped 212	121
RICL	ADAR	SEM_L2_2_4nm_EM_slices140to765_cropped 212	9
RICL	ADAR	SEM_L2_2_4nm_EM_slices140to765_cropped 212	68
RICL	ADAR	SEM_L2_2_4nm_EM_slices140to765_cropped 213	114
RICL	ADAR	SEM_L2_2_4nm_EM_slices140to765_cropped 213	9
RICL	ADAR	SEM_L2_2_4nm_EM_slices140to765_cropped 213	91
RICL	ADAR	SEM_L2_2_4nm_EM_slices140to765_cropped 214	155
RICL	ADAR	SEM_L2_2_4nm_EM_slices140to765_cropped 214	42
RICL	ADAR	SEM_L2_2_4nm_EM_slices140to765_cropped 214	80
RICL	ADAR	SEM_L2_2_4nm_EM_slices140to765_cropped 215	136
RICL	ADAR	SEM_L2_2_4nm_EM_slices140to765_cropped 215	24
RICL	ADAR	SEM_L2_2_4nm_EM_slices140to765_cropped 216	75
RICL	ADAR	SEM_L2_2_4nm_EM_slices140to765_cropped 216	38
RICL	ADAR	SEM_L2_2_4nm_EM_slices140to765_cropped 217	87
RICL	ADAR	SEM_L2_2_4nm_EM_slices140to765_cropped 217	44
RICL	ADAR	SEM_L2_2_4nm_EM_slices140to765_cropped 218	373
RICL	ADAR	SEM_L2_2_4nm_EM_slices140to765_cropped 218	65
RICL	ADAR	SEM_L2_2_4nm_EM_slices140to765_cropped 219	609
RICL	ADAR	SEM_L2_2_4nm_EM_slices140to765_cropped 219	44
RICL	ADAR	SEM_L2_2_4nm_EM_slices140to765_cropped 220	470
RICL	ADAR	SEM_L2_2_4nm_EM_slices140to765_cropped 220	50
RICL	ADAR	SEM_L2_2_4nm_EM_slices140to765_cropped 221	327
RICL	ADAR	SEM_L2_2_4nm_EM_slices140to765_cropped 223	111
RICL	ADAR	SEM_L2_2_4nm_EM_slices140to765_cropped 224	107
RICL	ADAR	SEM_L2_2_4nm_EM_slices140to765_cropped 225	143
RICL	ADAR	SEM_L2_2_4nm_EM_slices140to765_cropped 226	128
RICL	ADAR	SEM_L2_2_4nm_EM_slices140to765_cropped 227	130
RICL	ADAR	SEM_L2_2_4nm_EM_slices140to765_cropped 228	133
RICL	ADAR	SEM_L2_2_4nm_EM_slices140to765_cropped 229	122
RICL	ADAR	SEM_L2_2_4nm_EM_slices140to765_cropped 230	124
RICL	ADAR	SEM_L2_2_4nm_EM_slices140to765_cropped 231	120
RICL	ADAR	SEM_L2_2_4nm_EM_slices140to765_cropped 232	124
RICL	ADAR	SEM_L2_2_4nm_EM_slices140to765_cropped 233	114
RICL	ADAR	SEM_L2_2_4nm_EM_slices140to765_cropped 234	111
RICL	ADAR	SEM_L2_2_4nm_EM_slices140to765_cropped 235	127
RICL	ADAR	SEM_L2_2_4nm_EM_slices140to765_cropped 237	149
RICL	ADAR	SEM_L2_2_4nm_EM_slices140to765_cropped 238	147
RICL	ADAR	SEM_L2_2_4nm_EM_slices140to765_cropped 239	172
RICL	ADAR	SEM_L2_2_4nm_EM_slices140to765_cropped 240	122
RICL	ADAR	SEM_L2_2_4nm_EM_slices140to765_cropped 241	8
RICL	ADAR	SEM_L2_2_4nm_EM_slices140to765_cropped 279	50
RICL	ADAR	SEM_L2_2_4nm_EM_slices140to765_cropped 280	62
RICL	ADAR	SEM_L2_2_4nm_EM_slices140to765_cropped 281	70
RICL	ADAR	SEM_L2_2_4nm_EM_slices140to765_cropped 282	95
RICL	ADAR	SEM_L2_2_4nm_EM_slices140to765_cropped 283	103
RICL	ADAR	SEM_L2_2_4nm_EM_slices140to765_cropped 285	121
RICL	ADAR	SEM_L2_2_4nm_EM_slices140to765_cropped 286	78
RICL	ADAR	SEM_L2_2_4nm_EM_slices140to765_cropped 287	65
RICL	ADAR	SEM_L2_2_4nm_EM_slices140to765_cropped 288	49
RICL	ADAR	SEM_L2_2_4nm_EM_slices140to765_cropped 289	52
RICL	ADAR	SEM_L2_2_4nm_EM_slices140to765_cropped 290	56
RICL	ADAR	SEM_L2_2_4nm_EM_slices140to765_cropped 291	29
RICL	ADAR	SEM_L2_2_4nm_EM_slices140to765_cropped 292	42
RICL	ADAR	SEM_L2_2_4nm_EM_slices140to765_cropped 293	43
RICL	ADAR	SEM_L2_2_4nm_EM_slices140to765_cropped 294	65
RICL	ADAR	SEM_L2_2_4nm_EM_slices140to765_cropped 295	56
RICL	ADAR	SEM_L2_2_4nm_EM_slices140to765_cropped 296	54
RICL	ADAR	SEM_L2_2_4nm_EM_slices140to765_cropped 297	55
RICL	ADAR	SEM_L2_2_4nm_EM_slices140to765_cropped 298	55
RICL	ADAR	SEM_L2_2_4nm_EM_slices140to765_cropped 299	76
RICL	ADAR	SEM_L2_2_4nm_EM_slices140to765_cropped 300	79
RICL	ADAR	SEM_L2_2_4nm_EM_slices140to765_cropped 301	63
RICL	ADAR	SEM_L2_2_4nm_EM_slices140to765_cropped 302	91
RICL	ADAR	SEM_L2_2_4nm_EM_slices140to765_cropped 303	108
RICL	ADAR	SEM_L2_2_4nm_EM_slices140to765_cropped 304	119
RICL	ADAR	SEM_L2_2_4nm_EM_slices140to765_cropped 305	110
RICL	ADAR	SEM_L2_2_4nm_EM_slices140to765_cropped 306	136
RICL	ADAR	SEM_L2_2_4nm_EM_slices140to765_cropped 307	170
RICL	ADAR	SEM_L2_2_4nm_EM_slices140to765_cropped 308	144
RICL	ADAR	SEM_L2_2_4nm_EM_slices140to765_cropped 309	138
RICL	ADAR	SEM_L2_2_4nm_EM_slices140to765_cropped 310	136
RICL	ADAR	SEM_L2_2_4nm_EM_slices140to765_cropped 311	126
RICL	ADAR	SEM_L2_2_4nm_EM_slices140to765_cropped 312	107
RICL	ADAR	SEM_L2_2_4nm_EM_slices140to765_cropped 313	119
RICL	ADAR	SEM_L2_2_4nm_EM_slices140to765_cropped 314	134
RICL	ADAR	SEM_L2_2_4nm_EM_slices140to765_cropped 315	127
RICL	ADAR	SEM_L2_2_4nm_EM_slices140to765_cropped 316	133
RICL	ADAR	SEM_L2_2_4nm_EM_slices140to765_cropped 317	151
RICL	ADAR	SEM_L2_2_4nm_EM_slices140to765_cropped 318	166
RICL	ADAR	SEM_L2_2_4nm_EM_slices140to765_cropped 319	171
RICL	ADAR	SEM_L2_2_4nm_EM_slices140to765_cropped 320	190
RICL	ADAR	SEM_L2_2_4nm_EM_slices140to765_cropped 321	181
RICL	ADAR	SEM_L2_2_4nm_EM_slices140to765_cropped 322	180
RICL	ADAR	SEM_L2_2_4nm_EM_slices140to765_cropped 323	167
RICL	ADAR	SEM_L2_2_4nm_EM_slices140to765_cropped 324	171
RICL	ADAR	SEM_L2_2_4nm_EM_slices140to765_cropped 325	144
RICL	ADAR	SEM_L2_2_4nm_EM_slices140to765_cropped 326	110
RICL	ADAR	SEM_L2_2_4nm_EM_slices140to765_cropped 327	132
RICL	ADAR	SEM_L2_2_4nm_EM_slices140to765_cropped 328	142
RICL	ADAR	SEM_L2_2_4nm_EM_slices140to765_cropped 329	147
RICL	ADAR	SEM_L2_2_4nm_EM_slices140to765_cropped 330	187
RICL	ADAR	SEM_L2_2_4nm_EM_slices140to765_cropped 331	182
RICL	ADAR	SEM_L2_2_4nm_EM_slices140to765_cropped 332	250
RICL	ADAR	SEM_L2_2_4nm_EM_slices140to765_cropped 333	229
RICL	ADAR	SEM_L2_2_4nm_EM_slices140to765_cropped 334	216
RICL	ADAR	SEM_L2_2_4nm_EM_slices140to765_cropped 335	209
RICL	ADAR	SEM_L2_2_4nm_EM_slices140to765_cropped 336	206
RICL	ADAR	SEM_L2_2_4nm_EM_slices140to765_cropped 337	194
RICL	ADAR	SEM_L2_2_4nm_EM_slices140to765_cropped 338	200
RICL	ADAR	SEM_L2_2_4nm_EM_slices140to765_cropped 339	181
RICL	ADAR	SEM_L2_2_4nm_EM_slices140to765_cropped 340	143
RICL	ADAR	SEM_L2_2_4nm_EM_slices140to765_cropped 341	162
RICL	ADAR	SEM_L2_2_4nm_EM_slices140to765_cropped 342	145
RICL	ADAR	SEM_L2_2_4nm_EM_slices140to765_cropped 343	130
RICL	ADAR	SEM_L2_2_4nm_EM_slices140to765_cropped 344	110
RICL	ADAR	SEM_L2_2_4nm_EM_slices140to765_cropped 345	99
RICL	ADAR	SEM_L2_2_4nm_EM_slices140to765_cropped 346	100
RICL	ADAR	SEM_L2_2_4nm_EM_slices140to765_cropped 347	83
RICL	ADAR	SEM_L2_2_4nm_EM_slices140to765_cropped 348	85
RICL	ADAR	SEM_L2_2_4nm_EM_slices140to765_cropped 349	85
RICL	ADAR	SEM_L2_2_4nm_EM_slices140to765_cropped 350	101
RICL	ADAR	SEM_L2_2_4nm_EM_slices140to765_cropped 351	66
RICL	ADAR	SEM_L2_2_4nm_EM_slices140to765_cropped 352	80
RICL	ADAR	SEM_L2_2_4nm_EM_slices140to765_cropped 353	67
RICL	ADAR	SEM_L2_2_4nm_EM_slices140to765_cropped 354	62
RICL	ADAR	SEM_L2_2_4nm_EM_slices140to765_cropped 355	65
RICL	ADAR	SEM_L2_2_4nm_EM_slices140to765_cropped 357	13
RMGR	ADAR	SEM_L2_2_4nm_EM_slices140to765_cropped 198	5
RMGR	ADAR	SEM_L2_2_4nm_EM_slices140to765_cropped 198	89
RMGR	ADAR	SEM_L2_2_4nm_EM_slices140to765_cropped 199	71
RMGR	ADAR	SEM_L2_2_4nm_EM_slices140to765_cropped 241	89
RMGR	ADAR	SEM_L2_2_4nm_EM_slices140to765_cropped 242	81
RMGR	ADAR	SEM_L2_2_4nm_EM_slices140to765_cropped 243	152
RMGR	ADAR	SEM_L2_2_4nm_EM_slices140to765_cropped 244	79
RMGR	ADAR	SEM_L2_2_4nm_EM_slices140to765_cropped 245	16
RMGR	ADAR	SEM_L2_2_4nm_EM_slices140to765_cropped 246	39
RMGR	ADAR	SEM_L2_2_4nm_EM_slices140to765_cropped 247	82
RMGR	ADAR	SEM_L2_2_4nm_EM_slices140to765_cropped 248	54
RMGR	ADAR	SEM_L2_2_4nm_EM_slices140to765_cropped 249	96
RMGR	ADAR	SEM_L2_2_4nm_EM_slices140to765_cropped 250	101
RMGR	ADAR	SEM_L2_2_4nm_EM_slices140to765_cropped 251	85
SIADR	ADAR	SEM_L2_2_4nm_EM_slices140to765_cropped 237	43
SIADR	ADAR	SEM_L2_2_4nm_EM_slices140to765_cropped 238	2
URXR	ADAR	SEM_L2_2_4nm_EM_slices140to765_cropped 199	1
URXR	ADAR	SEM_L2_2_4nm_EM_slices140to765_cropped 201	24
URXR	ADAR	SEM_L2_2_4nm_EM_slices140to765_cropped 202	28
URXR	ADAR	SEM_L2_2_4nm_EM_slices140to765_cropped 202	17
URXR	ADAR	SEM_L2_2_4nm_EM_slices140to765_cropped 205	49
URXR	ADAR	SEM_L2_2_4nm_EM_slices140to765_cropped 205	50
URXR	ADAR	SEM_L2_2_4nm_EM_slices140to765_cropped 206	154
URXR	ADAR	SEM_L2_2_4nm_EM_slices140to765_cropped 209	114
URXR	ADAR	SEM_L2_2_4nm_EM_slices140to765_cropped 210	146
URXR	ADAR	SEM_L2_2_4nm_EM_slices140to765_cropped 210	6
URXR	ADAR	SEM_L2_2_4nm_EM_slices140to765_cropped 210	72
URXR	ADAR	SEM_L2_2_4nm_EM_slices140to765_cropped 211	180
URXR	ADAR	SEM_L2_2_4nm_EM_slices140to765_cropped 211	72
URXR	ADAR	SEM_L2_2_4nm_EM_slices140to765_cropped 212	134
URXR	ADAR	SEM_L2_2_4nm_EM_slices140to765_cropped 212	59
URXR	ADAR	SEM_L2_2_4nm_EM_slices140to765_cropped 213	104
URXR	ADAR	SEM_L2_2_4nm_EM_slices140to765_cropped 213	76
URXR	ADAR	SEM_L2_2_4nm_EM_slices140to765_cropped 213	61
URXR	ADAR	SEM_L2_2_4nm_EM_slices140to765_cropped 214	45
URXR	ADAR	SEM_L2_2_4nm_EM_slices140to765_cropped 214	100
URXR	ADAR	SEM_L2_2_4nm_EM_slices140to765_cropped 214	47
URXR	ADAR	SEM_L2_2_4nm_EM_slices140to765_cropped 215	26
URXR	ADAR	SEM_L2_2_4nm_EM_slices140to765_cropped 215	124
URXR	ADAR	SEM_L2_2_4nm_EM_slices140to765_cropped 216	45
URXR	ADAR	SEM_L2_2_4nm_EM_slices140to765_cropped 216	38
URXR	ADAR	SEM_L2_2_4nm_EM_slices140to765_cropped 216	113
URXR	ADAR	SEM_L2_2_4nm_EM_slices140to765_cropped 217	54
URXR	ADAR	SEM_L2_2_4nm_EM_slices140to765_cropped 217	209
URXR	ADAR	SEM_L2_2_4nm_EM_slices140to765_cropped 217	46
URXR	ADAR	SEM_L2_2_4nm_EM_slices140to765_cropped 217	43
URXR	ADAR	SEM_L2_2_4nm_EM_slices140to765_cropped 218	75
URXR	ADAR	SEM_L2_2_4nm_EM_slices140to765_cropped 218	259
URXR	ADAR	SEM_L2_2_4nm_EM_slices140to765_cropped 218	136
URXR	ADAR	SEM_L2_2_4nm_EM_slices140to765_cropped 218	5
URXR	ADAR	SEM_L2_2_4nm_EM_slices140to765_cropped 219	68
URXR	ADAR	SEM_L2_2_4nm_EM_slices140to765_cropped 219	253
URXR	ADAR	SEM_L2_2_4nm_EM_slices140to765_cropped 220	35
URXR	ADAR	SEM_L2_2_4nm_EM_slices140to765_cropped 220	257
URXR	ADAR	SEM_L2_2_4nm_EM_slices140to765_cropped 221	324
URXR	ADAR	SEM_L2_2_4nm_EM_slices140to765_cropped 222	326
URXR	ADAR	SEM_L2_2_4nm_EM_slices140to765_cropped 223	220
URXR	ADAR	SEM_L2_2_4nm_EM_slices140to765_cropped 224	215
URXR	ADAR	SEM_L2_2_4nm_EM_slices140to765_cropped 225	137
URXR	ADAR	SEM_L2_2_4nm_EM_slices140to765_cropped 226	151
URXR	ADAR	SEM_L2_2_4nm_EM_slices140to765_cropped 227	140
URXR	ADAR	SEM_L2_2_4nm_EM_slices140to765_cropped 228	134
URXR	ADAR	SEM_L2_2_4nm_EM_slices140to765_cropped 229	103
URXR	ADAR	SEM_L2_2_4nm_EM_slices140to765_cropped 230	152
URXR	ADAR	SEM_L2_2_4nm_EM_slices140to765_cropped 231	126
URXR	ADAR	SEM_L2_2_4nm_EM_slices140to765_cropped 232	90
URXR	ADAR	SEM_L2_2_4nm_EM_slices140to765_cropped 233	141
URXR	ADAR	SEM_L2_2_4nm_EM_slices140to765_cropped 234	146
URXR	ADAR	SEM_L2_2_4nm_EM_slices140to765_cropped 235	170
URXR	ADAR	SEM_L2_2_4nm_EM_slices140to765_cropped 236	188
URXR	ADAR	SEM_L2_2_4nm_EM_slices140to765_cropped 237	242
URXR	ADAR	SEM_L2_2_4nm_EM_slices140to765_cropped 238	235
URXR	ADAR	SEM_L2_2_4nm_EM_slices140to765_cropped 239	308
URXR	ADAR	SEM_L2_2_4nm_EM_slices140to765_cropped 240	135
URXR	ADAR	SEM_L2_2_4nm_EM_slices140to765_cropped 241	133
URXR	ADAR	SEM_L2_2_4nm_EM_slices140to765_cropped 242	94
ADAL	ADEL	SEM_L2_2_4nm_EM_slices140to765_cropped 440	46
ADAL	ADEL	SEM_L2_2_4nm_EM_slices140to765_cropped 441	48
ADAL	ADEL	SEM_L2_2_4nm_EM_slices140to765_cropped 442	87
ADAL	ADEL	SEM_L2_2_4nm_EM_slices140to765_cropped 443	61
ADAL	ADEL	SEM_L2_2_4nm_EM_slices140to765_cropped 444	72
ADAL	ADEL	SEM_L2_2_4nm_EM_slices140to765_cropped 445	98
ADAL	ADEL	SEM_L2_2_4nm_EM_slices140to765_cropped 446	86
ADAL	ADEL	SEM_L2_2_4nm_EM_slices140to765_cropped 447	73
ADAL	ADEL	SEM_L2_2_4nm_EM_slices140to765_cropped 448	63
ADAL	ADEL	SEM_L2_2_4nm_EM_slices140to765_cropped 449	53
ADAL	ADEL	SEM_L2_2_4nm_EM_slices140to765_cropped 450	63
ADAL	ADEL	SEM_L2_2_4nm_EM_slices140to765_cropped 451	81
ADAL	ADEL	SEM_L2_2_4nm_EM_slices140to765_cropped 452	93
ADAL	ADEL	SEM_L2_2_4nm_EM_slices140to765_cropped 453	117
ADAL	ADEL	SEM_L2_2_4nm_EM_slices140to765_cropped 454	117
ADAL	ADEL	SEM_L2_2_4nm_EM_slices140to765_cropped 455	105
ADAL	ADEL	SEM_L2_2_4nm_EM_slices140to765_cropped 456	109
ADAL	ADEL	SEM_L2_2_4nm_EM_slices140to765_cropped 457	118
ADAL	ADEL	SEM_L2_2_4nm_EM_slices140to765_cropped 458	120
ADAR	ADEL	SEM_L2_2_4nm_EM_slices140to765_cropped 458	33
ADER	ADEL	SEM_L2_2_4nm_EM_slices140to765_cropped 437	75
ADER	ADEL	SEM_L2_2_4nm_EM_slices140to765_cropped 438	37
ADER	ADEL	SEM_L2_2_4nm_EM_slices140to765_cropped 438	142
ADER	ADEL	SEM_L2_2_4nm_EM_slices140to765_cropped 439	110
ADER	ADEL	SEM_L2_2_4nm_EM_slices140to765_cropped 439	126
ADER	ADEL	SEM_L2_2_4nm_EM_slices140to765_cropped 440	199
ADER	ADEL	SEM_L2_2_4nm_EM_slices140to765_cropped 440	148
ADER	ADEL	SEM_L2_2_4nm_EM_slices140to765_cropped 441	81
ADER	ADEL	SEM_L2_2_4nm_EM_slices140to765_cropped 441	259
ADER	ADEL	SEM_L2_2_4nm_EM_slices140to765_cropped 441	125
ADER	ADEL	SEM_L2_2_4nm_EM_slices140to765_cropped 442	101
ADER	ADEL	SEM_L2_2_4nm_EM_slices140to765_cropped 442	378
ADER	ADEL	SEM_L2_2_4nm_EM_slices140to765_cropped 442	118
ADER	ADEL	SEM_L2_2_4nm_EM_slices140to765_cropped 443	106
ADER	ADEL	SEM_L2_2_4nm_EM_slices140to765_cropped 443	458
ADER	ADEL	SEM_L2_2_4nm_EM_slices140to765_cropped 443	113
ADER	ADEL	SEM_L2_2_4nm_EM_slices140to765_cropped 444	72
ADER	ADEL	SEM_L2_2_4nm_EM_slices140to765_cropped 444	439
ADER	ADEL	SEM_L2_2_4nm_EM_slices140to765_cropped 444	265
ADER	ADEL	SEM_L2_2_4nm_EM_slices140to765_cropped 445	115
ADER	ADEL	SEM_L2_2_4nm_EM_slices140to765_cropped 445	571
ADER	ADEL	SEM_L2_2_4nm_EM_slices140to765_cropped 445	329
ADER	ADEL	SEM_L2_2_4nm_EM_slices140to765_cropped 446	797
ADER	ADEL	SEM_L2_2_4nm_EM_slices140to765_cropped 446	337
ADER	ADEL	SEM_L2_2_4nm_EM_slices140to765_cropped 447	533
ADER	ADEL	SEM_L2_2_4nm_EM_slices140to765_cropped 447	73
ADER	ADEL	SEM_L2_2_4nm_EM_slices140to765_cropped 447	12
ADER	ADEL	SEM_L2_2_4nm_EM_slices140to765_cropped 447	105
ADER	ADEL	SEM_L2_2_4nm_EM_slices140to765_cropped 447	232
ADER	ADEL	SEM_L2_2_4nm_EM_slices140to765_cropped 448	533
ADER	ADEL	SEM_L2_2_4nm_EM_slices140to765_cropped 448	87
ADER	ADEL	SEM_L2_2_4nm_EM_slices140to765_cropped 448	62
ADER	ADEL	SEM_L2_2_4nm_EM_slices140to765_cropped 448	161
ADER	ADEL	SEM_L2_2_4nm_EM_slices140to765_cropped 448	172
ADER	ADEL	SEM_L2_2_4nm_EM_slices140to765_cropped 449	450
ADER	ADEL	SEM_L2_2_4nm_EM_slices140to765_cropped 449	193
ADER	ADEL	SEM_L2_2_4nm_EM_slices140to765_cropped 449	101
ADER	ADEL	SEM_L2_2_4nm_EM_slices140to765_cropped 449	95
ADER	ADEL	SEM_L2_2_4nm_EM_slices140to765_cropped 450	373
ADER	ADEL	SEM_L2_2_4nm_EM_slices140to765_cropped 450	262
ADER	ADEL	SEM_L2_2_4nm_EM_slices140to765_cropped 450	104
ADER	ADEL	SEM_L2_2_4nm_EM_slices140to765_cropped 451	371
ADER	ADEL	SEM_L2_2_4nm_EM_slices140to765_cropped 451	203
ADER	ADEL	SEM_L2_2_4nm_EM_slices140to765_cropped 451	72
ADER	ADEL	SEM_L2_2_4nm_EM_slices140to765_cropped 452	353
ADER	ADEL	SEM_L2_2_4nm_EM_slices140to765_cropped 452	216
ADER	ADEL	SEM_L2_2_4nm_EM_slices140to765_cropped 452	66
ADER	ADEL	SEM_L2_2_4nm_EM_slices140to765_cropped 453	346
ADER	ADEL	SEM_L2_2_4nm_EM_slices140to765_cropped 453	252
ADER	ADEL	SEM_L2_2_4nm_EM_slices140to765_cropped 453	38
ADER	ADEL	SEM_L2_2_4nm_EM_slices140to765_cropped 454	301
ADER	ADEL	SEM_L2_2_4nm_EM_slices140to765_cropped 454	275
ADER	ADEL	SEM_L2_2_4nm_EM_slices140to765_cropped 454	50
ADER	ADEL	SEM_L2_2_4nm_EM_slices140to765_cropped 455	339
ADER	ADEL	SEM_L2_2_4nm_EM_slices140to765_cropped 455	341
ADER	ADEL	SEM_L2_2_4nm_EM_slices140to765_cropped 455	56
ADER	ADEL	SEM_L2_2_4nm_EM_slices140to765_cropped 456	380
ADER	ADEL	SEM_L2_2_4nm_EM_slices140to765_cropped 456	64
ADER	ADEL	SEM_L2_2_4nm_EM_slices140to765_cropped 456	327
ADER	ADEL	SEM_L2_2_4nm_EM_slices140to765_cropped 457	181
ADER	ADEL	SEM_L2_2_4nm_EM_slices140to765_cropped 457	23
ADER	ADEL	SEM_L2_2_4nm_EM_slices140to765_cropped 457	323
ADER	ADEL	SEM_L2_2_4nm_EM_slices140to765_cropped 458	325
ADER	ADEL	SEM_L2_2_4nm_EM_slices140to765_cropped 458	153
ADER	ADEL	SEM_L2_2_4nm_EM_slices140to765_cropped 458	55
ADER	ADEL	SEM_L2_2_4nm_EM_slices140to765_cropped 458	161
AINL	ADEL	SEM_L2_2_4nm_EM_slices140to765_cropped 298	13
AINL	ADEL	SEM_L2_2_4nm_EM_slices140to765_cropped 299	22
AINL	ADEL	SEM_L2_2_4nm_EM_slices140to765_cropped 300	58
AINL	ADEL	SEM_L2_2_4nm_EM_slices140to765_cropped 301	90
AINL	ADEL	SEM_L2_2_4nm_EM_slices140to765_cropped 302	61
AINL	ADEL	SEM_L2_2_4nm_EM_slices140to765_cropped 303	82
AINL	ADEL	SEM_L2_2_4nm_EM_slices140to765_cropped 304	93
AINL	ADEL	SEM_L2_2_4nm_EM_slices140to765_cropped 305	84
AINL	ADEL	SEM_L2_2_4nm_EM_slices140to765_cropped 306	74
AINL	ADEL	SEM_L2_2_4nm_EM_slices140to765_cropped 307	69
AINL	ADEL	SEM_L2_2_4nm_EM_slices140to765_cropped 308	50
AINL	ADEL	SEM_L2_2_4nm_EM_slices140to765_cropped 309	43
AINL	ADEL	SEM_L2_2_4nm_EM_slices140to765_cropped 310	10
AINL	ADEL	SEM_L2_2_4nm_EM_slices140to765_cropped 311	30
ALML	ADEL	SEM_L2_2_4nm_EM_slices140to765_cropped 224	8
ALML	ADEL	SEM_L2_2_4nm_EM_slices140to765_cropped 225	55
ALML	ADEL	SEM_L2_2_4nm_EM_slices140to765_cropped 226	77
ALML	ADEL	SEM_L2_2_4nm_EM_slices140to765_cropped 227	85
ALML	ADEL	SEM_L2_2_4nm_EM_slices140to765_cropped 228	89
ALML	ADEL	SEM_L2_2_4nm_EM_slices140to765_cropped 229	71
ALML	ADEL	SEM_L2_2_4nm_EM_slices140to765_cropped 230	67
ALML	ADEL	SEM_L2_2_4nm_EM_slices140to765_cropped 231	62
ALML	ADEL	SEM_L2_2_4nm_EM_slices140to765_cropped 231	22
ALML	ADEL	SEM_L2_2_4nm_EM_slices140to765_cropped 232	78
ALML	ADEL	SEM_L2_2_4nm_EM_slices140to765_cropped 232	117
ALML	ADEL	SEM_L2_2_4nm_EM_slices140to765_cropped 233	93
ALML	ADEL	SEM_L2_2_4nm_EM_slices140to765_cropped 233	120
ALML	ADEL	SEM_L2_2_4nm_EM_slices140to765_cropped 234	112
ALML	ADEL	SEM_L2_2_4nm_EM_slices140to765_cropped 234	138
ALML	ADEL	SEM_L2_2_4nm_EM_slices140to765_cropped 235	85
ALML	ADEL	SEM_L2_2_4nm_EM_slices140to765_cropped 235	135
ALML	ADEL	SEM_L2_2_4nm_EM_slices140to765_cropped 236	125
ALML	ADEL	SEM_L2_2_4nm_EM_slices140to765_cropped 237	70
ALNL	ADEL	SEM_L2_2_4nm_EM_slices140to765_cropped 250	26
ALNL	ADEL	SEM_L2_2_4nm_EM_slices140to765_cropped 251	41
ALNL	ADEL	SEM_L2_2_4nm_EM_slices140to765_cropped 252	161
ALNL	ADEL	SEM_L2_2_4nm_EM_slices140to765_cropped 253	163
ALNL	ADEL	SEM_L2_2_4nm_EM_slices140to765_cropped 254	68
ALNL	ADEL	SEM_L2_2_4nm_EM_slices140to765_cropped 255	184
ALNL	ADEL	SEM_L2_2_4nm_EM_slices140to765_cropped 256	195
ALNL	ADEL	SEM_L2_2_4nm_EM_slices140to765_cropped 257	239
ALNL	ADEL	SEM_L2_2_4nm_EM_slices140to765_cropped 258	213
ALNL	ADEL	SEM_L2_2_4nm_EM_slices140to765_cropped 259	206
ALNL	ADEL	SEM_L2_2_4nm_EM_slices140to765_cropped 266	150
ALNL	ADEL	SEM_L2_2_4nm_EM_slices140to765_cropped 266	57
ALNL	ADEL	SEM_L2_2_4nm_EM_slices140to765_cropped 267	104
ALNL	ADEL	SEM_L2_2_4nm_EM_slices140to765_cropped 268	100
ALNL	ADEL	SEM_L2_2_4nm_EM_slices140to765_cropped 269	90
ALNL	ADEL	SEM_L2_2_4nm_EM_slices140to765_cropped 270	95
ALNL	ADEL	SEM_L2_2_4nm_EM_slices140to765_cropped 271	80
ALNL	ADEL	SEM_L2_2_4nm_EM_slices140to765_cropped 272	45
ALNL	ADEL	SEM_L2_2_4nm_EM_slices140to765_cropped 273	91
ALNL	ADEL	SEM_L2_2_4nm_EM_slices140to765_cropped 274	76
ALNL	ADEL	SEM_L2_2_4nm_EM_slices140to765_cropped 275	83
ALNL	ADEL	SEM_L2_2_4nm_EM_slices140to765_cropped 310	78
ALNL	ADEL	SEM_L2_2_4nm_EM_slices140to765_cropped 311	174
ALNL	ADEL	SEM_L2_2_4nm_EM_slices140to765_cropped 312	141
ALNL	ADEL	SEM_L2_2_4nm_EM_slices140to765_cropped 313	188
ALNL	ADEL	SEM_L2_2_4nm_EM_slices140to765_cropped 314	188
ALNL	ADEL	SEM_L2_2_4nm_EM_slices140to765_cropped 315	160
AQR	ADEL	SEM_L2_2_4nm_EM_slices140to765_cropped 435	139
AQR	ADEL	SEM_L2_2_4nm_EM_slices140to765_cropped 458	16
AVAR	ADEL	SEM_L2_2_4nm_EM_slices140to765_cropped 436	325
AVAR	ADEL	SEM_L2_2_4nm_EM_slices140to765_cropped 437	624
AVAR	ADEL	SEM_L2_2_4nm_EM_slices140to765_cropped 437	120
AVAR	ADEL	SEM_L2_2_4nm_EM_slices140to765_cropped 438	588
AVAR	ADEL	SEM_L2_2_4nm_EM_slices140to765_cropped 438	111
AVAR	ADEL	SEM_L2_2_4nm_EM_slices140to765_cropped 439	242
AVAR	ADEL	SEM_L2_2_4nm_EM_slices140to765_cropped 439	319
AVAR	ADEL	SEM_L2_2_4nm_EM_slices140to765_cropped 439	79
AVAR	ADEL	SEM_L2_2_4nm_EM_slices140to765_cropped 440	315
AVAR	ADEL	SEM_L2_2_4nm_EM_slices140to765_cropped 440	70
AVAR	ADEL	SEM_L2_2_4nm_EM_slices140to765_cropped 441	322
AVAR	ADEL	SEM_L2_2_4nm_EM_slices140to765_cropped 441	68
AVAR	ADEL	SEM_L2_2_4nm_EM_slices140to765_cropped 442	213
AVAR	ADEL	SEM_L2_2_4nm_EM_slices140to765_cropped 442	80
AVAR	ADEL	SEM_L2_2_4nm_EM_slices140to765_cropped 443	205
AVAR	ADEL	SEM_L2_2_4nm_EM_slices140to765_cropped 443	106
AVAR	ADEL	SEM_L2_2_4nm_EM_slices140to765_cropped 444	214
AVAR	ADEL	SEM_L2_2_4nm_EM_slices140to765_cropped 445	208
AVAR	ADEL	SEM_L2_2_4nm_EM_slices140to765_cropped 446	196
AVAR	ADEL	SEM_L2_2_4nm_EM_slices140to765_cropped 447	203
AVAR	ADEL	SEM_L2_2_4nm_EM_slices140to765_cropped 448	183
AVAR	ADEL	SEM_L2_2_4nm_EM_slices140to765_cropped 449	190
AVAR	ADEL	SEM_L2_2_4nm_EM_slices140to765_cropped 450	151
AVAR	ADEL	SEM_L2_2_4nm_EM_slices140to765_cropped 451	122
AVAR	ADEL	SEM_L2_2_4nm_EM_slices140to765_cropped 452	111
AVAR	ADEL	SEM_L2_2_4nm_EM_slices140to765_cropped 453	76
AVAR	ADEL	SEM_L2_2_4nm_EM_slices140to765_cropped 454	68
AVAR	ADEL	SEM_L2_2_4nm_EM_slices140to765_cropped 455	76
AVAR	ADEL	SEM_L2_2_4nm_EM_slices140to765_cropped 456	68
AVAR	ADEL	SEM_L2_2_4nm_EM_slices140to765_cropped 457	64
AVAR	ADEL	SEM_L2_2_4nm_EM_slices140to765_cropped 458	59
AVDL	ADEL	SEM_L2_2_4nm_EM_slices140to765_cropped 248	89
AVDL	ADEL	SEM_L2_2_4nm_EM_slices140to765_cropped 249	100
AVDL	ADEL	SEM_L2_2_4nm_EM_slices140to765_cropped 250	133
AVDL	ADEL	SEM_L2_2_4nm_EM_slices140to765_cropped 251	140
AVDL	ADEL	SEM_L2_2_4nm_EM_slices140to765_cropped 252	165
AVDL	ADEL	SEM_L2_2_4nm_EM_slices140to765_cropped 253	167
AVDL	ADEL	SEM_L2_2_4nm_EM_slices140to765_cropped 254	139
AVDL	ADEL	SEM_L2_2_4nm_EM_slices140to765_cropped 255	135
AVEL	ADEL	SEM_L2_2_4nm_EM_slices140to765_cropped 458	234
AVHL	ADEL	SEM_L2_2_4nm_EM_slices140to765_cropped 254	18
AVHL	ADEL	SEM_L2_2_4nm_EM_slices140to765_cropped 275	23
AVHL	ADEL	SEM_L2_2_4nm_EM_slices140to765_cropped 287	46
AVHL	ADEL	SEM_L2_2_4nm_EM_slices140to765_cropped 289	47
AVHL	ADEL	SEM_L2_2_4nm_EM_slices140to765_cropped 298	22
AVHL	ADEL	SEM_L2_2_4nm_EM_slices140to765_cropped 299	38
AVHL	ADEL	SEM_L2_2_4nm_EM_slices140to765_cropped 300	72
AVHL	ADEL	SEM_L2_2_4nm_EM_slices140to765_cropped 301	91
AVHL	ADEL	SEM_L2_2_4nm_EM_slices140to765_cropped 302	71
AVHL	ADEL	SEM_L2_2_4nm_EM_slices140to765_cropped 303	86
AVHL	ADEL	SEM_L2_2_4nm_EM_slices140to765_cropped 304	98
AVHL	ADEL	SEM_L2_2_4nm_EM_slices140to765_cropped 305	110
AVHL	ADEL	SEM_L2_2_4nm_EM_slices140to765_cropped 306	99
AVHL	ADEL	SEM_L2_2_4nm_EM_slices140to765_cropped 307	101
AVHL	ADEL	SEM_L2_2_4nm_EM_slices140to765_cropped 308	107
AVHL	ADEL	SEM_L2_2_4nm_EM_slices140to765_cropped 309	111
AVHL	ADEL	SEM_L2_2_4nm_EM_slices140to765_cropped 310	167
AVHL	ADEL	SEM_L2_2_4nm_EM_slices140to765_cropped 311	162
AVHL	ADEL	SEM_L2_2_4nm_EM_slices140to765_cropped 312	124
AVHL	ADEL	SEM_L2_2_4nm_EM_slices140to765_cropped 313	133
AVHL	ADEL	SEM_L2_2_4nm_EM_slices140to765_cropped 314	107
AVHL	ADEL	SEM_L2_2_4nm_EM_slices140to765_cropped 315	94
AVJL	ADEL	SEM_L2_2_4nm_EM_slices140to765_cropped 248	28
AVJL	ADEL	SEM_L2_2_4nm_EM_slices140to765_cropped 249	38
AVJL	ADEL	SEM_L2_2_4nm_EM_slices140to765_cropped 250	58
AVJL	ADEL	SEM_L2_2_4nm_EM_slices140to765_cropped 251	51
AVJL	ADEL	SEM_L2_2_4nm_EM_slices140to765_cropped 252	46
AVJL	ADEL	SEM_L2_2_4nm_EM_slices140to765_cropped 253	48
AVJL	ADEL	SEM_L2_2_4nm_EM_slices140to765_cropped 254	122
AVJL	ADEL	SEM_L2_2_4nm_EM_slices140to765_cropped 257	103
AVJL	ADEL	SEM_L2_2_4nm_EM_slices140to765_cropped 258	127
AVJL	ADEL	SEM_L2_2_4nm_EM_slices140to765_cropped 259	131
AVJL	ADEL	SEM_L2_2_4nm_EM_slices140to765_cropped 260	189
AVJL	ADEL	SEM_L2_2_4nm_EM_slices140to765_cropped 261	204
AVJL	ADEL	SEM_L2_2_4nm_EM_slices140to765_cropped 262	163
AVJL	ADEL	SEM_L2_2_4nm_EM_slices140to765_cropped 263	175
AVJL	ADEL	SEM_L2_2_4nm_EM_slices140to765_cropped 264	144
AVJL	ADEL	SEM_L2_2_4nm_EM_slices140to765_cropped 265	66
AVJL	ADEL	SEM_L2_2_4nm_EM_slices140to765_cropped 266	118
AVJL	ADEL	SEM_L2_2_4nm_EM_slices140to765_cropped 267	122
AVJL	ADEL	SEM_L2_2_4nm_EM_slices140to765_cropped 268	107
AVJL	ADEL	SEM_L2_2_4nm_EM_slices140to765_cropped 269	98
AVJL	ADEL	SEM_L2_2_4nm_EM_slices140to765_cropped 271	37
AVKL	ADEL	SEM_L2_2_4nm_EM_slices140to765_cropped 437	62
AVKL	ADEL	SEM_L2_2_4nm_EM_slices140to765_cropped 438	160
AVKL	ADEL	SEM_L2_2_4nm_EM_slices140to765_cropped 439	118
AVKL	ADEL	SEM_L2_2_4nm_EM_slices140to765_cropped 440	132
AVKL	ADEL	SEM_L2_2_4nm_EM_slices140to765_cropped 441	160
AVKL	ADEL	SEM_L2_2_4nm_EM_slices140to765_cropped 442	142
AVKL	ADEL	SEM_L2_2_4nm_EM_slices140to765_cropped 443	126
AVKL	ADEL	SEM_L2_2_4nm_EM_slices140to765_cropped 444	149
AVKL	ADEL	SEM_L2_2_4nm_EM_slices140to765_cropped 445	148
AVKL	ADEL	SEM_L2_2_4nm_EM_slices140to765_cropped 446	124
AVKR	ADEL	SEM_L2_2_4nm_EM_slices140to765_cropped 440	134
AVKR	ADEL	SEM_L2_2_4nm_EM_slices140to765_cropped 441	130
AVKR	ADEL	SEM_L2_2_4nm_EM_slices140to765_cropped 442	155
AVKR	ADEL	SEM_L2_2_4nm_EM_slices140to765_cropped 443	155
AVKR	ADEL	SEM_L2_2_4nm_EM_slices140to765_cropped 444	151
AVKR	ADEL	SEM_L2_2_4nm_EM_slices140to765_cropped 445	164
AVKR	ADEL	SEM_L2_2_4nm_EM_slices140to765_cropped 446	147
AVKR	ADEL	SEM_L2_2_4nm_EM_slices140to765_cropped 447	81
AVKR	ADEL	SEM_L2_2_4nm_EM_slices140to765_cropped 448	63
AVM	ADEL	SEM_L2_2_4nm_EM_slices140to765_cropped 440	46
AVM	ADEL	SEM_L2_2_4nm_EM_slices140to765_cropped 441	55
AVM	ADEL	SEM_L2_2_4nm_EM_slices140to765_cropped 442	68
AVM	ADEL	SEM_L2_2_4nm_EM_slices140to765_cropped 443	69
AVM	ADEL	SEM_L2_2_4nm_EM_slices140to765_cropped 444	72
AVM	ADEL	SEM_L2_2_4nm_EM_slices140to765_cropped 447	59
AVM	ADEL	SEM_L2_2_4nm_EM_slices140to765_cropped 448	31
AVM	ADEL	SEM_L2_2_4nm_EM_slices140to765_cropped 453	42
AVM	ADEL	SEM_L2_2_4nm_EM_slices140to765_cropped 454	88
AVM	ADEL	SEM_L2_2_4nm_EM_slices140to765_cropped 455	81
AVM	ADEL	SEM_L2_2_4nm_EM_slices140to765_cropped 456	100
AVM	ADEL	SEM_L2_2_4nm_EM_slices140to765_cropped 457	196
AVM	ADEL	SEM_L2_2_4nm_EM_slices140to765_cropped 457	81
AVM	ADEL	SEM_L2_2_4nm_EM_slices140to765_cropped 458	41
BDUL	ADEL	SEM_L2_2_4nm_EM_slices140to765_cropped 235	7
BDUL	ADEL	SEM_L2_2_4nm_EM_slices140to765_cropped 236	75
BDUL	ADEL	SEM_L2_2_4nm_EM_slices140to765_cropped 237	185
BDUL	ADEL	SEM_L2_2_4nm_EM_slices140to765_cropped 238	110
BDUL	ADEL	SEM_L2_2_4nm_EM_slices140to765_cropped 241	46
BDUL	ADEL	SEM_L2_2_4nm_EM_slices140to765_cropped 242	137
BDUL	ADEL	SEM_L2_2_4nm_EM_slices140to765_cropped 243	118
BDUL	ADEL	SEM_L2_2_4nm_EM_slices140to765_cropped 244	43
CEPDL	ADEL	SEM_L2_2_4nm_EM_slices140to765_cropped 184	75
CEPDL	ADEL	SEM_L2_2_4nm_EM_slices140to765_cropped 185	149
CEPDL	ADEL	SEM_L2_2_4nm_EM_slices140to765_cropped 186	249
CEPDL	ADEL	SEM_L2_2_4nm_EM_slices140to765_cropped 187	239
CEPDL	ADEL	SEM_L2_2_4nm_EM_slices140to765_cropped 188	58
CEPDL	ADEL	SEM_L2_2_4nm_EM_slices140to765_cropped 189	90
CEPDL	ADEL	SEM_L2_2_4nm_EM_slices140to765_cropped 190	130
CEPDL	ADEL	SEM_L2_2_4nm_EM_slices140to765_cropped 191	56
CEPDL	ADEL	SEM_L2_2_4nm_EM_slices140to765_cropped 192	93
CEPDL	ADEL	SEM_L2_2_4nm_EM_slices140to765_cropped 193	141
CEPDL	ADEL	SEM_L2_2_4nm_EM_slices140to765_cropped 194	115
CEPDL	ADEL	SEM_L2_2_4nm_EM_slices140to765_cropped 195	85
CEPDL	ADEL	SEM_L2_2_4nm_EM_slices140to765_cropped 196	61
CEPDL	ADEL	SEM_L2_2_4nm_EM_slices140to765_cropped 218	58
CEPDL	ADEL	SEM_L2_2_4nm_EM_slices140to765_cropped 219	129
CEPDL	ADEL	SEM_L2_2_4nm_EM_slices140to765_cropped 220	92
CEPDL	ADEL	SEM_L2_2_4nm_EM_slices140to765_cropped 221	129
CEPDL	ADEL	SEM_L2_2_4nm_EM_slices140to765_cropped 222	114
CEPVL	ADEL	SEM_L2_2_4nm_EM_slices140to765_cropped 223	88
CEPVL	ADEL	SEM_L2_2_4nm_EM_slices140to765_cropped 224	41
CEPVL	ADEL	SEM_L2_2_4nm_EM_slices140to765_cropped 225	57
FLPL	ADEL	SEM_L2_2_4nm_EM_slices140to765_cropped 441	102
FLPL	ADEL	SEM_L2_2_4nm_EM_slices140to765_cropped 442	62
FLPL	ADEL	SEM_L2_2_4nm_EM_slices140to765_cropped 453	15
FLPL	ADEL	SEM_L2_2_4nm_EM_slices140to765_cropped 454	84
FLPL	ADEL	SEM_L2_2_4nm_EM_slices140to765_cropped 455	108
FLPL	ADEL	SEM_L2_2_4nm_EM_slices140to765_cropped 456	76
FLPL	ADEL	SEM_L2_2_4nm_EM_slices140to765_cropped 457	79
FLPL	ADEL	SEM_L2_2_4nm_EM_slices140to765_cropped 458	58
IL1L	ADEL	SEM_L2_2_4nm_EM_slices140to765_cropped 238	91
IL1L	ADEL	SEM_L2_2_4nm_EM_slices140to765_cropped 239	149
IL1L	ADEL	SEM_L2_2_4nm_EM_slices140to765_cropped 240	190
IL1L	ADEL	SEM_L2_2_4nm_EM_slices140to765_cropped 241	203
IL1L	ADEL	SEM_L2_2_4nm_EM_slices140to765_cropped 242	256
IL1L	ADEL	SEM_L2_2_4nm_EM_slices140to765_cropped 243	279
IL1L	ADEL	SEM_L2_2_4nm_EM_slices140to765_cropped 244	279
IL1L	ADEL	SEM_L2_2_4nm_EM_slices140to765_cropped 245	143
IL1L	ADEL	SEM_L2_2_4nm_EM_slices140to765_cropped 246	131
IL1L	ADEL	SEM_L2_2_4nm_EM_slices140to765_cropped 246	189
IL1L	ADEL	SEM_L2_2_4nm_EM_slices140to765_cropped 247	148
IL1L	ADEL	SEM_L2_2_4nm_EM_slices140to765_cropped 247	156
IL1L	ADEL	SEM_L2_2_4nm_EM_slices140to765_cropped 248	187
IL1L	ADEL	SEM_L2_2_4nm_EM_slices140to765_cropped 248	157
IL1L	ADEL	SEM_L2_2_4nm_EM_slices140to765_cropped 249	175
IL1L	ADEL	SEM_L2_2_4nm_EM_slices140to765_cropped 249	89
IL1L	ADEL	SEM_L2_2_4nm_EM_slices140to765_cropped 250	92
IL1L	ADEL	SEM_L2_2_4nm_EM_slices140to765_cropped 250	71
IL1L	ADEL	SEM_L2_2_4nm_EM_slices140to765_cropped 251	144
IL1L	ADEL	SEM_L2_2_4nm_EM_slices140to765_cropped 251	38
IL1L	ADEL	SEM_L2_2_4nm_EM_slices140to765_cropped 252	65
IL1L	ADEL	SEM_L2_2_4nm_EM_slices140to765_cropped 252	10
IL1L	ADEL	SEM_L2_2_4nm_EM_slices140to765_cropped 253	136
IL1L	ADEL	SEM_L2_2_4nm_EM_slices140to765_cropped 253	48
IL1L	ADEL	SEM_L2_2_4nm_EM_slices140to765_cropped 254	99
IL1L	ADEL	SEM_L2_2_4nm_EM_slices140to765_cropped 254	53
IL1L	ADEL	SEM_L2_2_4nm_EM_slices140to765_cropped 255	195
IL1L	ADEL	SEM_L2_2_4nm_EM_slices140to765_cropped 256	200
IL1L	ADEL	SEM_L2_2_4nm_EM_slices140to765_cropped 257	166
IL1L	ADEL	SEM_L2_2_4nm_EM_slices140to765_cropped 258	144
IL1L	ADEL	SEM_L2_2_4nm_EM_slices140to765_cropped 259	61
IL2L	ADEL	SEM_L2_2_4nm_EM_slices140to765_cropped 192	48
IL2L	ADEL	SEM_L2_2_4nm_EM_slices140to765_cropped 193	54
IL2L	ADEL	SEM_L2_2_4nm_EM_slices140to765_cropped 194	49
IL2L	ADEL	SEM_L2_2_4nm_EM_slices140to765_cropped 195	69
IL2L	ADEL	SEM_L2_2_4nm_EM_slices140to765_cropped 196	71
IL2L	ADEL	SEM_L2_2_4nm_EM_slices140to765_cropped 197	94
IL2L	ADEL	SEM_L2_2_4nm_EM_slices140to765_cropped 198	86
IL2L	ADEL	SEM_L2_2_4nm_EM_slices140to765_cropped 199	62
IL2L	ADEL	SEM_L2_2_4nm_EM_slices140to765_cropped 242	78
IL2L	ADEL	SEM_L2_2_4nm_EM_slices140to765_cropped 243	67
OLLL	ADEL	SEM_L2_2_4nm_EM_slices140to765_cropped 185	63
OLLL	ADEL	SEM_L2_2_4nm_EM_slices140to765_cropped 186	97
OLLL	ADEL	SEM_L2_2_4nm_EM_slices140to765_cropped 187	97
OLLL	ADEL	SEM_L2_2_4nm_EM_slices140to765_cropped 188	107
OLLL	ADEL	SEM_L2_2_4nm_EM_slices140to765_cropped 189	98
OLLL	ADEL	SEM_L2_2_4nm_EM_slices140to765_cropped 190	62
OLLL	ADEL	SEM_L2_2_4nm_EM_slices140to765_cropped 191	28
OLLL	ADEL	SEM_L2_2_4nm_EM_slices140to765_cropped 233	40
OLLL	ADEL	SEM_L2_2_4nm_EM_slices140to765_cropped 234	113
OLLL	ADEL	SEM_L2_2_4nm_EM_slices140to765_cropped 235	113
OLLL	ADEL	SEM_L2_2_4nm_EM_slices140to765_cropped 236	124
OLLL	ADEL	SEM_L2_2_4nm_EM_slices140to765_cropped 237	144
OLLL	ADEL	SEM_L2_2_4nm_EM_slices140to765_cropped 238	165
OLLL	ADEL	SEM_L2_2_4nm_EM_slices140to765_cropped 239	162
OLLL	ADEL	SEM_L2_2_4nm_EM_slices140to765_cropped 240	147
OLLL	ADEL	SEM_L2_2_4nm_EM_slices140to765_cropped 241	175
OLLL	ADEL	SEM_L2_2_4nm_EM_slices140to765_cropped 242	153
OLLL	ADEL	SEM_L2_2_4nm_EM_slices140to765_cropped 243	149
OLLL	ADEL	SEM_L2_2_4nm_EM_slices140to765_cropped 244	136
OLLL	ADEL	SEM_L2_2_4nm_EM_slices140to765_cropped 245	110
OLLL	ADEL	SEM_L2_2_4nm_EM_slices140to765_cropped 246	92
OLLL	ADEL	SEM_L2_2_4nm_EM_slices140to765_cropped 247	66
OLLL	ADEL	SEM_L2_2_4nm_EM_slices140to765_cropped 248	8
PVCL	ADEL	SEM_L2_2_4nm_EM_slices140to765_cropped 438	71
PVCL	ADEL	SEM_L2_2_4nm_EM_slices140to765_cropped 439	108
PVCL	ADEL	SEM_L2_2_4nm_EM_slices140to765_cropped 440	130
PVCL	ADEL	SEM_L2_2_4nm_EM_slices140to765_cropped 441	126
PVCL	ADEL	SEM_L2_2_4nm_EM_slices140to765_cropped 442	131
PVCL	ADEL	SEM_L2_2_4nm_EM_slices140to765_cropped 443	142
PVCL	ADEL	SEM_L2_2_4nm_EM_slices140to765_cropped 444	134
PVCL	ADEL	SEM_L2_2_4nm_EM_slices140to765_cropped 445	138
PVCL	ADEL	SEM_L2_2_4nm_EM_slices140to765_cropped 446	99
PVCL	ADEL	SEM_L2_2_4nm_EM_slices140to765_cropped 447	95
PVCL	ADEL	SEM_L2_2_4nm_EM_slices140to765_cropped 448	62
PVCL	ADEL	SEM_L2_2_4nm_EM_slices140to765_cropped 449	82
PVCL	ADEL	SEM_L2_2_4nm_EM_slices140to765_cropped 450	85
PVCL	ADEL	SEM_L2_2_4nm_EM_slices140to765_cropped 451	74
PVCL	ADEL	SEM_L2_2_4nm_EM_slices140to765_cropped 452	62
PVCL	ADEL	SEM_L2_2_4nm_EM_slices140to765_cropped 453	70
PVCL	ADEL	SEM_L2_2_4nm_EM_slices140to765_cropped 454	59
PVCL	ADEL	SEM_L2_2_4nm_EM_slices140to765_cropped 455	116
PVCL	ADEL	SEM_L2_2_4nm_EM_slices140to765_cropped 457	74
PVCL	ADEL	SEM_L2_2_4nm_EM_slices140to765_cropped 458	75
PVPR	ADEL	SEM_L2_2_4nm_EM_slices140to765_cropped 447	34
PVPR	ADEL	SEM_L2_2_4nm_EM_slices140to765_cropped 448	28
PVPR	ADEL	SEM_L2_2_4nm_EM_slices140to765_cropped 449	44
PVPR	ADEL	SEM_L2_2_4nm_EM_slices140to765_cropped 450	71
PVPR	ADEL	SEM_L2_2_4nm_EM_slices140to765_cropped 451	45
PVPR	ADEL	SEM_L2_2_4nm_EM_slices140to765_cropped 452	81
PVPR	ADEL	SEM_L2_2_4nm_EM_slices140to765_cropped 453	66
PVPR	ADEL	SEM_L2_2_4nm_EM_slices140to765_cropped 454	79
PVPR	ADEL	SEM_L2_2_4nm_EM_slices140to765_cropped 455	88
PVPR	ADEL	SEM_L2_2_4nm_EM_slices140to765_cropped 456	87
PVPR	ADEL	SEM_L2_2_4nm_EM_slices140to765_cropped 457	52
PVR	ADEL	SEM_L2_2_4nm_EM_slices140to765_cropped 225	109
PVR	ADEL	SEM_L2_2_4nm_EM_slices140to765_cropped 226	140
PVR	ADEL	SEM_L2_2_4nm_EM_slices140to765_cropped 227	133
PVR	ADEL	SEM_L2_2_4nm_EM_slices140to765_cropped 228	191
PVR	ADEL	SEM_L2_2_4nm_EM_slices140to765_cropped 229	169
PVR	ADEL	SEM_L2_2_4nm_EM_slices140to765_cropped 230	151
RIFL	ADEL	SEM_L2_2_4nm_EM_slices140to765_cropped 238	93
RIFL	ADEL	SEM_L2_2_4nm_EM_slices140to765_cropped 239	165
RIFL	ADEL	SEM_L2_2_4nm_EM_slices140to765_cropped 240	154
RIFL	ADEL	SEM_L2_2_4nm_EM_slices140to765_cropped 241	291
RIFL	ADEL	SEM_L2_2_4nm_EM_slices140to765_cropped 242	58
RIFL	ADEL	SEM_L2_2_4nm_EM_slices140to765_cropped 242	237
RIFL	ADEL	SEM_L2_2_4nm_EM_slices140to765_cropped 243	266
RIFL	ADEL	SEM_L2_2_4nm_EM_slices140to765_cropped 244	303
RIFL	ADEL	SEM_L2_2_4nm_EM_slices140to765_cropped 245	136
RIFL	ADEL	SEM_L2_2_4nm_EM_slices140to765_cropped 246	85
RIGL	ADEL	SEM_L2_2_4nm_EM_slices140to765_cropped 436	2
RIGL	ADEL	SEM_L2_2_4nm_EM_slices140to765_cropped 437	97
RIGL	ADEL	SEM_L2_2_4nm_EM_slices140to765_cropped 438	165
RIGL	ADEL	SEM_L2_2_4nm_EM_slices140to765_cropped 439	199
RIGL	ADEL	SEM_L2_2_4nm_EM_slices140to765_cropped 440	168
RIGL	ADEL	SEM_L2_2_4nm_EM_slices140to765_cropped 441	232
RIGL	ADEL	SEM_L2_2_4nm_EM_slices140to765_cropped 442	270
RIGL	ADEL	SEM_L2_2_4nm_EM_slices140to765_cropped 443	316
RIGL	ADEL	SEM_L2_2_4nm_EM_slices140to765_cropped 444	301
RIGL	ADEL	SEM_L2_2_4nm_EM_slices140to765_cropped 445	374
RIGL	ADEL	SEM_L2_2_4nm_EM_slices140to765_cropped 446	359
RIGL	ADEL	SEM_L2_2_4nm_EM_slices140to765_cropped 447	227
RIGL	ADEL	SEM_L2_2_4nm_EM_slices140to765_cropped 448	239
RIGL	ADEL	SEM_L2_2_4nm_EM_slices140to765_cropped 449	107
RIGL	ADEL	SEM_L2_2_4nm_EM_slices140to765_cropped 449	51
RIH	ADEL	SEM_L2_2_4nm_EM_slices140to765_cropped 445	37
RIH	ADEL	SEM_L2_2_4nm_EM_slices140to765_cropped 446	34
RIH	ADEL	SEM_L2_2_4nm_EM_slices140to765_cropped 447	38
RIH	ADEL	SEM_L2_2_4nm_EM_slices140to765_cropped 448	52
RIH	ADEL	SEM_L2_2_4nm_EM_slices140to765_cropped 449	35
RMDR	ADEL	SEM_L2_2_4nm_EM_slices140to765_cropped 183	72
RMDR	ADEL	SEM_L2_2_4nm_EM_slices140to765_cropped 184	77
RMDR	ADEL	SEM_L2_2_4nm_EM_slices140to765_cropped 185	185
RMDR	ADEL	SEM_L2_2_4nm_EM_slices140to765_cropped 186	113
RMDR	ADEL	SEM_L2_2_4nm_EM_slices140to765_cropped 187	52
RMDR	ADEL	SEM_L2_2_4nm_EM_slices140to765_cropped 188	81
RMDR	ADEL	SEM_L2_2_4nm_EM_slices140to765_cropped 189	54
RMDR	ADEL	SEM_L2_2_4nm_EM_slices140to765_cropped 190	54
RMDR	ADEL	SEM_L2_2_4nm_EM_slices140to765_cropped 191	62
RMDR	ADEL	SEM_L2_2_4nm_EM_slices140to765_cropped 192	68
RMDR	ADEL	SEM_L2_2_4nm_EM_slices140to765_cropped 193	58
RMDR	ADEL	SEM_L2_2_4nm_EM_slices140to765_cropped 194	81
RMDR	ADEL	SEM_L2_2_4nm_EM_slices140to765_cropped 195	30
RMDR	ADEL	SEM_L2_2_4nm_EM_slices140to765_cropped 196	34
RMDR	ADEL	SEM_L2_2_4nm_EM_slices140to765_cropped 197	32
RMDR	ADEL	SEM_L2_2_4nm_EM_slices140to765_cropped 198	32
RMER	ADEL	SEM_L2_2_4nm_EM_slices140to765_cropped 183	41
RMER	ADEL	SEM_L2_2_4nm_EM_slices140to765_cropped 184	63
RMER	ADEL	SEM_L2_2_4nm_EM_slices140to765_cropped 185	112
RMER	ADEL	SEM_L2_2_4nm_EM_slices140to765_cropped 186	40
RMER	ADEL	SEM_L2_2_4nm_EM_slices140to765_cropped 187	87
RMER	ADEL	SEM_L2_2_4nm_EM_slices140to765_cropped 188	105
RMER	ADEL	SEM_L2_2_4nm_EM_slices140to765_cropped 189	103
RMER	ADEL	SEM_L2_2_4nm_EM_slices140to765_cropped 190	100
RMER	ADEL	SEM_L2_2_4nm_EM_slices140to765_cropped 191	129
RMER	ADEL	SEM_L2_2_4nm_EM_slices140to765_cropped 192	120
RMER	ADEL	SEM_L2_2_4nm_EM_slices140to765_cropped 193	137
RMER	ADEL	SEM_L2_2_4nm_EM_slices140to765_cropped 194	105
RMER	ADEL	SEM_L2_2_4nm_EM_slices140to765_cropped 195	115
RMER	ADEL	SEM_L2_2_4nm_EM_slices140to765_cropped 196	107
RMER	ADEL	SEM_L2_2_4nm_EM_slices140to765_cropped 197	114
RMER	ADEL	SEM_L2_2_4nm_EM_slices140to765_cropped 198	114
RMER	ADEL	SEM_L2_2_4nm_EM_slices140to765_cropped 199	108
RMER	ADEL	SEM_L2_2_4nm_EM_slices140to765_cropped 200	104
RMER	ADEL	SEM_L2_2_4nm_EM_slices140to765_cropped 201	74
SAADR	ADEL	SEM_L2_2_4nm_EM_slices140to765_cropped 221	49
SAADR	ADEL	SEM_L2_2_4nm_EM_slices140to765_cropped 222	66
SAADR	ADEL	SEM_L2_2_4nm_EM_slices140to765_cropped 223	127
SAADR	ADEL	SEM_L2_2_4nm_EM_slices140to765_cropped 224	120
SAADR	ADEL	SEM_L2_2_4nm_EM_slices140to765_cropped 225	124
SAADR	ADEL	SEM_L2_2_4nm_EM_slices140to765_cropped 226	130
SAADR	ADEL	SEM_L2_2_4nm_EM_slices140to765_cropped 227	123
SAADR	ADEL	SEM_L2_2_4nm_EM_slices140to765_cropped 228	123
SAADR	ADEL	SEM_L2_2_4nm_EM_slices140to765_cropped 229	101
SAADR	ADEL	SEM_L2_2_4nm_EM_slices140to765_cropped 230	107
SAADR	ADEL	SEM_L2_2_4nm_EM_slices140to765_cropped 231	87
SAADR	ADEL	SEM_L2_2_4nm_EM_slices140to765_cropped 232	105
SAADR	ADEL	SEM_L2_2_4nm_EM_slices140to765_cropped 233	73
SAADR	ADEL	SEM_L2_2_4nm_EM_slices140to765_cropped 234	63
SAADR	ADEL	SEM_L2_2_4nm_EM_slices140to765_cropped 235	69
SAADR	ADEL	SEM_L2_2_4nm_EM_slices140to765_cropped 236	49
SAADR	ADEL	SEM_L2_2_4nm_EM_slices140to765_cropped 237	16
SAADR	ADEL	SEM_L2_2_4nm_EM_slices140to765_cropped 238	31
SAADR	ADEL	SEM_L2_2_4nm_EM_slices140to765_cropped 239	30
SAADR	ADEL	SEM_L2_2_4nm_EM_slices140to765_cropped 240	24
SAADR	ADEL	SEM_L2_2_4nm_EM_slices140to765_cropped 241	73
SAADR	ADEL	SEM_L2_2_4nm_EM_slices140to765_cropped 242	48
SAADR	ADEL	SEM_L2_2_4nm_EM_slices140to765_cropped 243	43
SAADR	ADEL	SEM_L2_2_4nm_EM_slices140to765_cropped 244	72
SAADR	ADEL	SEM_L2_2_4nm_EM_slices140to765_cropped 245	70
SAADR	ADEL	SEM_L2_2_4nm_EM_slices140to765_cropped 246	84
SAADR	ADEL	SEM_L2_2_4nm_EM_slices140to765_cropped 247	77
SAADR	ADEL	SEM_L2_2_4nm_EM_slices140to765_cropped 248	97
SAADR	ADEL	SEM_L2_2_4nm_EM_slices140to765_cropped 249	111
SAADR	ADEL	SEM_L2_2_4nm_EM_slices140to765_cropped 250	104
SAADR	ADEL	SEM_L2_2_4nm_EM_slices140to765_cropped 251	122
SAADR	ADEL	SEM_L2_2_4nm_EM_slices140to765_cropped 252	117
SAADR	ADEL	SEM_L2_2_4nm_EM_slices140to765_cropped 253	84
SAAVL	ADEL	SEM_L2_2_4nm_EM_slices140to765_cropped 255	3
SAAVL	ADEL	SEM_L2_2_4nm_EM_slices140to765_cropped 256	56
SAAVL	ADEL	SEM_L2_2_4nm_EM_slices140to765_cropped 260	90
SAAVL	ADEL	SEM_L2_2_4nm_EM_slices140to765_cropped 260	91
SDQL	ADEL	SEM_L2_2_4nm_EM_slices140to765_cropped 239	151
SDQL	ADEL	SEM_L2_2_4nm_EM_slices140to765_cropped 240	137
SDQL	ADEL	SEM_L2_2_4nm_EM_slices140to765_cropped 240	118
SDQL	ADEL	SEM_L2_2_4nm_EM_slices140to765_cropped 241	63
SDQL	ADEL	SEM_L2_2_4nm_EM_slices140to765_cropped 241	3
SDQL	ADEL	SEM_L2_2_4nm_EM_slices140to765_cropped 242	79
SDQL	ADEL	SEM_L2_2_4nm_EM_slices140to765_cropped 243	126
SDQL	ADEL	SEM_L2_2_4nm_EM_slices140to765_cropped 244	90
SDQL	ADEL	SEM_L2_2_4nm_EM_slices140to765_cropped 245	111
SDQL	ADEL	SEM_L2_2_4nm_EM_slices140to765_cropped 246	185
SDQL	ADEL	SEM_L2_2_4nm_EM_slices140to765_cropped 247	143
SDQL	ADEL	SEM_L2_2_4nm_EM_slices140to765_cropped 248	120
SDQL	ADEL	SEM_L2_2_4nm_EM_slices140to765_cropped 249	70
SDQL	ADEL	SEM_L2_2_4nm_EM_slices140to765_cropped 253	86
SDQL	ADEL	SEM_L2_2_4nm_EM_slices140to765_cropped 255	76
SDQL	ADEL	SEM_L2_2_4nm_EM_slices140to765_cropped 256	118
SDQL	ADEL	SEM_L2_2_4nm_EM_slices140to765_cropped 257	108
SDQL	ADEL	SEM_L2_2_4nm_EM_slices140to765_cropped 258	116
SDQL	ADEL	SEM_L2_2_4nm_EM_slices140to765_cropped 259	120
SDQL	ADEL	SEM_L2_2_4nm_EM_slices140to765_cropped 260	92
SDQL	ADEL	SEM_L2_2_4nm_EM_slices140to765_cropped 261	73
SDQL	ADEL	SEM_L2_2_4nm_EM_slices140to765_cropped 262	23
SIBDR	ADEL	SEM_L2_2_4nm_EM_slices140to765_cropped 247	91
SIBDR	ADEL	SEM_L2_2_4nm_EM_slices140to765_cropped 248	122
SIBDR	ADEL	SEM_L2_2_4nm_EM_slices140to765_cropped 249	115
SIBDR	ADEL	SEM_L2_2_4nm_EM_slices140to765_cropped 250	83
SIBDR	ADEL	SEM_L2_2_4nm_EM_slices140to765_cropped 251	163
SIBDR	ADEL	SEM_L2_2_4nm_EM_slices140to765_cropped 252	144
SIBDR	ADEL	SEM_L2_2_4nm_EM_slices140to765_cropped 253	151
SIBDR	ADEL	SEM_L2_2_4nm_EM_slices140to765_cropped 254	137
SIBDR	ADEL	SEM_L2_2_4nm_EM_slices140to765_cropped 255	28
SIBDR	ADEL	SEM_L2_2_4nm_EM_slices140to765_cropped 256	52
SIBDR	ADEL	SEM_L2_2_4nm_EM_slices140to765_cropped 257	59
SIBDR	ADEL	SEM_L2_2_4nm_EM_slices140to765_cropped 258	73
SIBDR	ADEL	SEM_L2_2_4nm_EM_slices140to765_cropped 259	60
SIBDR	ADEL	SEM_L2_2_4nm_EM_slices140to765_cropped 278	12
SIBDR	ADEL	SEM_L2_2_4nm_EM_slices140to765_cropped 283	61
SIBDR	ADEL	SEM_L2_2_4nm_EM_slices140to765_cropped 284	62
SIBDR	ADEL	SEM_L2_2_4nm_EM_slices140to765_cropped 285	77
SIBDR	ADEL	SEM_L2_2_4nm_EM_slices140to765_cropped 286	92
SIBDR	ADEL	SEM_L2_2_4nm_EM_slices140to765_cropped 287	75
SIBDR	ADEL	SEM_L2_2_4nm_EM_slices140to765_cropped 289	56
SIBDR	ADEL	SEM_L2_2_4nm_EM_slices140to765_cropped 290	85
SIBDR	ADEL	SEM_L2_2_4nm_EM_slices140to765_cropped 291	83
SIBDR	ADEL	SEM_L2_2_4nm_EM_slices140to765_cropped 292	70
SIBDR	ADEL	SEM_L2_2_4nm_EM_slices140to765_cropped 293	71
SIBDR	ADEL	SEM_L2_2_4nm_EM_slices140to765_cropped 294	38
SIBDR	ADEL	SEM_L2_2_4nm_EM_slices140to765_cropped 296	33
SIBDR	ADEL	SEM_L2_2_4nm_EM_slices140to765_cropped 300	8
SIBDR	ADEL	SEM_L2_2_4nm_EM_slices140to765_cropped 301	28
SIBDR	ADEL	SEM_L2_2_4nm_EM_slices140to765_cropped 302	46
SIBDR	ADEL	SEM_L2_2_4nm_EM_slices140to765_cropped 303	52
SIBDR	ADEL	SEM_L2_2_4nm_EM_slices140to765_cropped 304	57
SIBDR	ADEL	SEM_L2_2_4nm_EM_slices140to765_cropped 305	70
SIBDR	ADEL	SEM_L2_2_4nm_EM_slices140to765_cropped 306	60
SIBDR	ADEL	SEM_L2_2_4nm_EM_slices140to765_cropped 307	60
SIBDR	ADEL	SEM_L2_2_4nm_EM_slices140to765_cropped 308	34
SMBDR	ADEL	SEM_L2_2_4nm_EM_slices140to765_cropped 255	24
SMBDR	ADEL	SEM_L2_2_4nm_EM_slices140to765_cropped 256	72
SMBDR	ADEL	SEM_L2_2_4nm_EM_slices140to765_cropped 257	98
SMBDR	ADEL	SEM_L2_2_4nm_EM_slices140to765_cropped 258	187
SMBDR	ADEL	SEM_L2_2_4nm_EM_slices140to765_cropped 259	202
SMBDR	ADEL	SEM_L2_2_4nm_EM_slices140to765_cropped 260	168
SMBDR	ADEL	SEM_L2_2_4nm_EM_slices140to765_cropped 261	129
SMBDR	ADEL	SEM_L2_2_4nm_EM_slices140to765_cropped 262	32
SMBDR	ADEL	SEM_L2_2_4nm_EM_slices140to765_cropped 443	26
SMBDR	ADEL	SEM_L2_2_4nm_EM_slices140to765_cropped 444	10
SMBDR	ADEL	SEM_L2_2_4nm_EM_slices140to765_cropped 445	104
SMBDR	ADEL	SEM_L2_2_4nm_EM_slices140to765_cropped 446	98
SMBDR	ADEL	SEM_L2_2_4nm_EM_slices140to765_cropped 447	69
SMBDR	ADEL	SEM_L2_2_4nm_EM_slices140to765_cropped 448	45
SMBDR	ADEL	SEM_L2_2_4nm_EM_slices140to765_cropped 455	2
SMBDR	ADEL	SEM_L2_2_4nm_EM_slices140to765_cropped 456	30
SMDDR	ADEL	SEM_L2_2_4nm_EM_slices140to765_cropped 249	58
SMDDR	ADEL	SEM_L2_2_4nm_EM_slices140to765_cropped 250	102
SMDDR	ADEL	SEM_L2_2_4nm_EM_slices140to765_cropped 252	262
SMDDR	ADEL	SEM_L2_2_4nm_EM_slices140to765_cropped 253	411
SMDDR	ADEL	SEM_L2_2_4nm_EM_slices140to765_cropped 254	164
SMDDR	ADEL	SEM_L2_2_4nm_EM_slices140to765_cropped 255	274
SMDDR	ADEL	SEM_L2_2_4nm_EM_slices140to765_cropped 256	305
SMDDR	ADEL	SEM_L2_2_4nm_EM_slices140to765_cropped 257	267
SMDDR	ADEL	SEM_L2_2_4nm_EM_slices140to765_cropped 258	269
SMDDR	ADEL	SEM_L2_2_4nm_EM_slices140to765_cropped 259	254
SMDDR	ADEL	SEM_L2_2_4nm_EM_slices140to765_cropped 260	226
SMDDR	ADEL	SEM_L2_2_4nm_EM_slices140to765_cropped 261	146
SMDDR	ADEL	SEM_L2_2_4nm_EM_slices140to765_cropped 262	142
SMDDR	ADEL	SEM_L2_2_4nm_EM_slices140to765_cropped 263	110
SMDDR	ADEL	SEM_L2_2_4nm_EM_slices140to765_cropped 264	158
SMDDR	ADEL	SEM_L2_2_4nm_EM_slices140to765_cropped 265	118
SMDDR	ADEL	SEM_L2_2_4nm_EM_slices140to765_cropped 273	55
SMDDR	ADEL	SEM_L2_2_4nm_EM_slices140to765_cropped 274	66
SMDDR	ADEL	SEM_L2_2_4nm_EM_slices140to765_cropped 275	59
SMDDR	ADEL	SEM_L2_2_4nm_EM_slices140to765_cropped 297	37
SMDDR	ADEL	SEM_L2_2_4nm_EM_slices140to765_cropped 298	73
SMDDR	ADEL	SEM_L2_2_4nm_EM_slices140to765_cropped 299	84
SMDDR	ADEL	SEM_L2_2_4nm_EM_slices140to765_cropped 300	94
SMDDR	ADEL	SEM_L2_2_4nm_EM_slices140to765_cropped 301	103
SMDDR	ADEL	SEM_L2_2_4nm_EM_slices140to765_cropped 302	111
SMDDR	ADEL	SEM_L2_2_4nm_EM_slices140to765_cropped 303	110
SMDDR	ADEL	SEM_L2_2_4nm_EM_slices140to765_cropped 304	119
SMDDR	ADEL	SEM_L2_2_4nm_EM_slices140to765_cropped 305	126
SMDDR	ADEL	SEM_L2_2_4nm_EM_slices140to765_cropped 306	128
SMDDR	ADEL	SEM_L2_2_4nm_EM_slices140to765_cropped 307	113
SMDDR	ADEL	SEM_L2_2_4nm_EM_slices140to765_cropped 308	128
SMDDR	ADEL	SEM_L2_2_4nm_EM_slices140to765_cropped 309	99
SMDDR	ADEL	SEM_L2_2_4nm_EM_slices140to765_cropped 310	70
SMDVR	ADEL	SEM_L2_2_4nm_EM_slices140to765_cropped 449	104
SMDVR	ADEL	SEM_L2_2_4nm_EM_slices140to765_cropped 450	129
SMDVR	ADEL	SEM_L2_2_4nm_EM_slices140to765_cropped 451	107
SMDVR	ADEL	SEM_L2_2_4nm_EM_slices140to765_cropped 452	73
URBL	ADEL	SEM_L2_2_4nm_EM_slices140to765_cropped 185	7
URBL	ADEL	SEM_L2_2_4nm_EM_slices140to765_cropped 186	46
URBL	ADEL	SEM_L2_2_4nm_EM_slices140to765_cropped 187	82
URBL	ADEL	SEM_L2_2_4nm_EM_slices140to765_cropped 188	154
URBL	ADEL	SEM_L2_2_4nm_EM_slices140to765_cropped 189	131
URBL	ADEL	SEM_L2_2_4nm_EM_slices140to765_cropped 190	130
URBL	ADEL	SEM_L2_2_4nm_EM_slices140to765_cropped 191	159
URBL	ADEL	SEM_L2_2_4nm_EM_slices140to765_cropped 192	130
URBL	ADEL	SEM_L2_2_4nm_EM_slices140to765_cropped 193	98
URBL	ADEL	SEM_L2_2_4nm_EM_slices140to765_cropped 194	85
URBL	ADEL	SEM_L2_2_4nm_EM_slices140to765_cropped 195	142
URBL	ADEL	SEM_L2_2_4nm_EM_slices140to765_cropped 196	121
URBL	ADEL	SEM_L2_2_4nm_EM_slices140to765_cropped 197	138
URBL	ADEL	SEM_L2_2_4nm_EM_slices140to765_cropped 198	126
URBL	ADEL	SEM_L2_2_4nm_EM_slices140to765_cropped 198	30
URBL	ADEL	SEM_L2_2_4nm_EM_slices140to765_cropped 199	114
URBL	ADEL	SEM_L2_2_4nm_EM_slices140to765_cropped 199	34
URBL	ADEL	SEM_L2_2_4nm_EM_slices140to765_cropped 200	117
URBL	ADEL	SEM_L2_2_4nm_EM_slices140to765_cropped 200	54
URBL	ADEL	SEM_L2_2_4nm_EM_slices140to765_cropped 201	138
URBL	ADEL	SEM_L2_2_4nm_EM_slices140to765_cropped 201	67
URBL	ADEL	SEM_L2_2_4nm_EM_slices140to765_cropped 202	154
URBL	ADEL	SEM_L2_2_4nm_EM_slices140to765_cropped 202	57
URBL	ADEL	SEM_L2_2_4nm_EM_slices140to765_cropped 203	175
URBL	ADEL	SEM_L2_2_4nm_EM_slices140to765_cropped 203	26
URBL	ADEL	SEM_L2_2_4nm_EM_slices140to765_cropped 204	202
URBL	ADEL	SEM_L2_2_4nm_EM_slices140to765_cropped 204	46
URBL	ADEL	SEM_L2_2_4nm_EM_slices140to765_cropped 205	265
URBL	ADEL	SEM_L2_2_4nm_EM_slices140to765_cropped 206	240
URBL	ADEL	SEM_L2_2_4nm_EM_slices140to765_cropped 207	222
URBL	ADEL	SEM_L2_2_4nm_EM_slices140to765_cropped 208	232
URBL	ADEL	SEM_L2_2_4nm_EM_slices140to765_cropped 209	196
URBL	ADEL	SEM_L2_2_4nm_EM_slices140to765_cropped 210	171
URBL	ADEL	SEM_L2_2_4nm_EM_slices140to765_cropped 211	144
URBL	ADEL	SEM_L2_2_4nm_EM_slices140to765_cropped 212	150
URBL	ADEL	SEM_L2_2_4nm_EM_slices140to765_cropped 213	145
URBL	ADEL	SEM_L2_2_4nm_EM_slices140to765_cropped 214	124
URBL	ADEL	SEM_L2_2_4nm_EM_slices140to765_cropped 215	151
URBL	ADEL	SEM_L2_2_4nm_EM_slices140to765_cropped 216	152
URBL	ADEL	SEM_L2_2_4nm_EM_slices140to765_cropped 217	106
URBL	ADEL	SEM_L2_2_4nm_EM_slices140to765_cropped 218	99
URBL	ADEL	SEM_L2_2_4nm_EM_slices140to765_cropped 219	248
URBL	ADEL	SEM_L2_2_4nm_EM_slices140to765_cropped 220	245
URBL	ADEL	SEM_L2_2_4nm_EM_slices140to765_cropped 221	226
URBL	ADEL	SEM_L2_2_4nm_EM_slices140to765_cropped 222	219
URBL	ADEL	SEM_L2_2_4nm_EM_slices140to765_cropped 223	232
URBL	ADEL	SEM_L2_2_4nm_EM_slices140to765_cropped 224	214
URBL	ADEL	SEM_L2_2_4nm_EM_slices140to765_cropped 225	223
URBL	ADEL	SEM_L2_2_4nm_EM_slices140to765_cropped 226	169
URBL	ADEL	SEM_L2_2_4nm_EM_slices140to765_cropped 227	107
URBL	ADEL	SEM_L2_2_4nm_EM_slices140to765_cropped 228	71
URBL	ADEL	SEM_L2_2_4nm_EM_slices140to765_cropped 229	62
URBL	ADEL	SEM_L2_2_4nm_EM_slices140to765_cropped 230	65
URBL	ADEL	SEM_L2_2_4nm_EM_slices140to765_cropped 231	42
URBL	ADEL	SEM_L2_2_4nm_EM_slices140to765_cropped 232	64
URBL	ADEL	SEM_L2_2_4nm_EM_slices140to765_cropped 233	46
URBL	ADEL	SEM_L2_2_4nm_EM_slices140to765_cropped 234	50
URBL	ADEL	SEM_L2_2_4nm_EM_slices140to765_cropped 235	86
URBL	ADEL	SEM_L2_2_4nm_EM_slices140to765_cropped 236	122
URBL	ADEL	SEM_L2_2_4nm_EM_slices140to765_cropped 237	135
URBL	ADEL	SEM_L2_2_4nm_EM_slices140to765_cropped 238	180
URBL	ADEL	SEM_L2_2_4nm_EM_slices140to765_cropped 239	203
URBL	ADEL	SEM_L2_2_4nm_EM_slices140to765_cropped 240	166
URBL	ADEL	SEM_L2_2_4nm_EM_slices140to765_cropped 242	29
URBL	ADEL	SEM_L2_2_4nm_EM_slices140to765_cropped 242	107
URBL	ADEL	SEM_L2_2_4nm_EM_slices140to765_cropped 243	216
URBL	ADEL	SEM_L2_2_4nm_EM_slices140to765_cropped 243	91
URBL	ADEL	SEM_L2_2_4nm_EM_slices140to765_cropped 244	205
URBL	ADEL	SEM_L2_2_4nm_EM_slices140to765_cropped 245	135
URBL	ADEL	SEM_L2_2_4nm_EM_slices140to765_cropped 245	125
URBL	ADEL	SEM_L2_2_4nm_EM_slices140to765_cropped 246	202
URBL	ADEL	SEM_L2_2_4nm_EM_slices140to765_cropped 246	264
URBL	ADEL	SEM_L2_2_4nm_EM_slices140to765_cropped 247	182
URBL	ADEL	SEM_L2_2_4nm_EM_slices140to765_cropped 247	246
URBL	ADEL	SEM_L2_2_4nm_EM_slices140to765_cropped 248	247
URBL	ADEL	SEM_L2_2_4nm_EM_slices140to765_cropped 248	296
URBL	ADEL	SEM_L2_2_4nm_EM_slices140to765_cropped 249	222
URBL	ADEL	SEM_L2_2_4nm_EM_slices140to765_cropped 249	291
URBL	ADEL	SEM_L2_2_4nm_EM_slices140to765_cropped 250	156
URBL	ADEL	SEM_L2_2_4nm_EM_slices140to765_cropped 250	364
URBL	ADEL	SEM_L2_2_4nm_EM_slices140to765_cropped 251	131
URBL	ADEL	SEM_L2_2_4nm_EM_slices140to765_cropped 251	329
URBL	ADEL	SEM_L2_2_4nm_EM_slices140to765_cropped 252	259
ADAR	ADER	SEM_L2_2_4nm_EM_slices140to765_cropped 452	37
ADAR	ADER	SEM_L2_2_4nm_EM_slices140to765_cropped 453	71
ADAR	ADER	SEM_L2_2_4nm_EM_slices140to765_cropped 454	62
ADAR	ADER	SEM_L2_2_4nm_EM_slices140to765_cropped 455	37
ADAR	ADER	SEM_L2_2_4nm_EM_slices140to765_cropped 456	30
ADAR	ADER	SEM_L2_2_4nm_EM_slices140to765_cropped 457	30
ADAR	ADER	SEM_L2_2_4nm_EM_slices140to765_cropped 458	14
AVAL	ADER	SEM_L2_2_4nm_EM_slices140to765_cropped 441	2
AVAL	ADER	SEM_L2_2_4nm_EM_slices140to765_cropped 442	50
AVAL	ADER	SEM_L2_2_4nm_EM_slices140to765_cropped 443	74
AVAL	ADER	SEM_L2_2_4nm_EM_slices140to765_cropped 450	35
AVAL	ADER	SEM_L2_2_4nm_EM_slices140to765_cropped 452	49
AVAL	ADER	SEM_L2_2_4nm_EM_slices140to765_cropped 453	57
AVAL	ADER	SEM_L2_2_4nm_EM_slices140to765_cropped 454	94
AVAL	ADER	SEM_L2_2_4nm_EM_slices140to765_cropped 455	122
AVAL	ADER	SEM_L2_2_4nm_EM_slices140to765_cropped 456	162
AVAL	ADER	SEM_L2_2_4nm_EM_slices140to765_cropped 457	170
AVAL	ADER	SEM_L2_2_4nm_EM_slices140to765_cropped 458	159
AVDR	ADER	SEM_L2_2_4nm_EM_slices140to765_cropped 278	91
AVDR	ADER	SEM_L2_2_4nm_EM_slices140to765_cropped 279	71
AVDR	ADER	SEM_L2_2_4nm_EM_slices140to765_cropped 280	68
AVDR	ADER	SEM_L2_2_4nm_EM_slices140to765_cropped 281	107
AVDR	ADER	SEM_L2_2_4nm_EM_slices140to765_cropped 282	152
AVDR	ADER	SEM_L2_2_4nm_EM_slices140to765_cropped 283	150
AVDR	ADER	SEM_L2_2_4nm_EM_slices140to765_cropped 284	82
AVDR	ADER	SEM_L2_2_4nm_EM_slices140to765_cropped 285	99
AVDR	ADER	SEM_L2_2_4nm_EM_slices140to765_cropped 286	99
AVDR	ADER	SEM_L2_2_4nm_EM_slices140to765_cropped 287	90
AVDR	ADER	SEM_L2_2_4nm_EM_slices140to765_cropped 288	78
AVDR	ADER	SEM_L2_2_4nm_EM_slices140to765_cropped 289	73
AVDR	ADER	SEM_L2_2_4nm_EM_slices140to765_cropped 290	50
AVDR	ADER	SEM_L2_2_4nm_EM_slices140to765_cropped 291	18
AVDR	ADER	SEM_L2_2_4nm_EM_slices140to765_cropped 293	28
AVDR	ADER	SEM_L2_2_4nm_EM_slices140to765_cropped 294	52
AVDR	ADER	SEM_L2_2_4nm_EM_slices140to765_cropped 295	52
AVDR	ADER	SEM_L2_2_4nm_EM_slices140to765_cropped 312	2
AVDR	ADER	SEM_L2_2_4nm_EM_slices140to765_cropped 313	2
AVDR	ADER	SEM_L2_2_4nm_EM_slices140to765_cropped 317	56
AVDR	ADER	SEM_L2_2_4nm_EM_slices140to765_cropped 318	62
AVDR	ADER	SEM_L2_2_4nm_EM_slices140to765_cropped 319	79
AVDR	ADER	SEM_L2_2_4nm_EM_slices140to765_cropped 320	81
AVDR	ADER	SEM_L2_2_4nm_EM_slices140to765_cropped 322	111
AVDR	ADER	SEM_L2_2_4nm_EM_slices140to765_cropped 327	59
AVDR	ADER	SEM_L2_2_4nm_EM_slices140to765_cropped 332	65
AVDR	ADER	SEM_L2_2_4nm_EM_slices140to765_cropped 333	92
AVEL	ADER	SEM_L2_2_4nm_EM_slices140to765_cropped 447	43
AVEL	ADER	SEM_L2_2_4nm_EM_slices140to765_cropped 448	75
AVEL	ADER	SEM_L2_2_4nm_EM_slices140to765_cropped 449	75
AVEL	ADER	SEM_L2_2_4nm_EM_slices140to765_cropped 450	196
AVEL	ADER	SEM_L2_2_4nm_EM_slices140to765_cropped 451	156
AVEL	ADER	SEM_L2_2_4nm_EM_slices140to765_cropped 452	150
AVEL	ADER	SEM_L2_2_4nm_EM_slices140to765_cropped 453	178
AVEL	ADER	SEM_L2_2_4nm_EM_slices140to765_cropped 454	113
AVEL	ADER	SEM_L2_2_4nm_EM_slices140to765_cropped 455	196
AVEL	ADER	SEM_L2_2_4nm_EM_slices140to765_cropped 456	132
AVEL	ADER	SEM_L2_2_4nm_EM_slices140to765_cropped 457	75
BDUR	ADER	SEM_L2_2_4nm_EM_slices140to765_cropped 234	21
BDUR	ADER	SEM_L2_2_4nm_EM_slices140to765_cropped 236	18
CEPVR	ADER	SEM_L2_2_4nm_EM_slices140to765_cropped 218	205
CEPVR	ADER	SEM_L2_2_4nm_EM_slices140to765_cropped 219	211
CEPVR	ADER	SEM_L2_2_4nm_EM_slices140to765_cropped 220	205
CEPVR	ADER	SEM_L2_2_4nm_EM_slices140to765_cropped 221	214
CEPVR	ADER	SEM_L2_2_4nm_EM_slices140to765_cropped 222	342
CEPVR	ADER	SEM_L2_2_4nm_EM_slices140to765_cropped 223	222
CEPVR	ADER	SEM_L2_2_4nm_EM_slices140to765_cropped 224	177
CEPVR	ADER	SEM_L2_2_4nm_EM_slices140to765_cropped 225	101
FLPR	ADER	SEM_L2_2_4nm_EM_slices140to765_cropped 437	40
FLPR	ADER	SEM_L2_2_4nm_EM_slices140to765_cropped 438	103
FLPR	ADER	SEM_L2_2_4nm_EM_slices140to765_cropped 439	58
FLPR	ADER	SEM_L2_2_4nm_EM_slices140to765_cropped 440	6
IL1R	ADER	SEM_L2_2_4nm_EM_slices140to765_cropped 231	45
IL1R	ADER	SEM_L2_2_4nm_EM_slices140to765_cropped 232	40
IL1R	ADER	SEM_L2_2_4nm_EM_slices140to765_cropped 233	50
IL1R	ADER	SEM_L2_2_4nm_EM_slices140to765_cropped 234	97
IL1R	ADER	SEM_L2_2_4nm_EM_slices140to765_cropped 235	62
IL1R	ADER	SEM_L2_2_4nm_EM_slices140to765_cropped 236	72
IL1R	ADER	SEM_L2_2_4nm_EM_slices140to765_cropped 237	70
IL1R	ADER	SEM_L2_2_4nm_EM_slices140to765_cropped 238	85
IL1R	ADER	SEM_L2_2_4nm_EM_slices140to765_cropped 239	111
IL1R	ADER	SEM_L2_2_4nm_EM_slices140to765_cropped 240	123
IL1R	ADER	SEM_L2_2_4nm_EM_slices140to765_cropped 241	129
IL1R	ADER	SEM_L2_2_4nm_EM_slices140to765_cropped 242	137
IL1R	ADER	SEM_L2_2_4nm_EM_slices140to765_cropped 243	181
IL1R	ADER	SEM_L2_2_4nm_EM_slices140to765_cropped 244	176
IL1R	ADER	SEM_L2_2_4nm_EM_slices140to765_cropped 245	150
IL1R	ADER	SEM_L2_2_4nm_EM_slices140to765_cropped 246	154
IL1R	ADER	SEM_L2_2_4nm_EM_slices140to765_cropped 247	148
IL1R	ADER	SEM_L2_2_4nm_EM_slices140to765_cropped 248	144
IL1R	ADER	SEM_L2_2_4nm_EM_slices140to765_cropped 249	146
IL1R	ADER	SEM_L2_2_4nm_EM_slices140to765_cropped 250	156
IL1R	ADER	SEM_L2_2_4nm_EM_slices140to765_cropped 251	149
IL1R	ADER	SEM_L2_2_4nm_EM_slices140to765_cropped 252	122
IL1R	ADER	SEM_L2_2_4nm_EM_slices140to765_cropped 253	313
IL1R	ADER	SEM_L2_2_4nm_EM_slices140to765_cropped 253	100
IL1R	ADER	SEM_L2_2_4nm_EM_slices140to765_cropped 254	329
IL1R	ADER	SEM_L2_2_4nm_EM_slices140to765_cropped 255	339
IL1R	ADER	SEM_L2_2_4nm_EM_slices140to765_cropped 256	323
IL1R	ADER	SEM_L2_2_4nm_EM_slices140to765_cropped 257	297
IL1R	ADER	SEM_L2_2_4nm_EM_slices140to765_cropped 258	301
IL1R	ADER	SEM_L2_2_4nm_EM_slices140to765_cropped 259	244
IL1R	ADER	SEM_L2_2_4nm_EM_slices140to765_cropped 260	86
IL1R	ADER	SEM_L2_2_4nm_EM_slices140to765_cropped 260	129
IL1R	ADER	SEM_L2_2_4nm_EM_slices140to765_cropped 261	145
IL1R	ADER	SEM_L2_2_4nm_EM_slices140to765_cropped 261	138
IL1R	ADER	SEM_L2_2_4nm_EM_slices140to765_cropped 262	97
IL1R	ADER	SEM_L2_2_4nm_EM_slices140to765_cropped 263	66
IL1R	ADER	SEM_L2_2_4nm_EM_slices140to765_cropped 264	40
IL1R	ADER	SEM_L2_2_4nm_EM_slices140to765_cropped 265	12
RIAR	ADER	SEM_L2_2_4nm_EM_slices140to765_cropped 273	211
RIGL	ADER	SEM_L2_2_4nm_EM_slices140to765_cropped 448	48
RIGL	ADER	SEM_L2_2_4nm_EM_slices140to765_cropped 449	77
RIGL	ADER	SEM_L2_2_4nm_EM_slices140to765_cropped 450	175
RIGL	ADER	SEM_L2_2_4nm_EM_slices140to765_cropped 451	201
RIGL	ADER	SEM_L2_2_4nm_EM_slices140to765_cropped 452	185
RIGL	ADER	SEM_L2_2_4nm_EM_slices140to765_cropped 453	161
RIGL	ADER	SEM_L2_2_4nm_EM_slices140to765_cropped 454	171
RIGL	ADER	SEM_L2_2_4nm_EM_slices140to765_cropped 455	192
RIGL	ADER	SEM_L2_2_4nm_EM_slices140to765_cropped 456	166
RIGL	ADER	SEM_L2_2_4nm_EM_slices140to765_cropped 457	171
RIGL	ADER	SEM_L2_2_4nm_EM_slices140to765_cropped 458	169
RIVR	ADER	SEM_L2_2_4nm_EM_slices140to765_cropped 261	149
RIVR	ADER	SEM_L2_2_4nm_EM_slices140to765_cropped 262	199
RIVR	ADER	SEM_L2_2_4nm_EM_slices140to765_cropped 263	237
RIVR	ADER	SEM_L2_2_4nm_EM_slices140to765_cropped 264	287
RIVR	ADER	SEM_L2_2_4nm_EM_slices140to765_cropped 265	248
RIVR	ADER	SEM_L2_2_4nm_EM_slices140to765_cropped 266	276
RIVR	ADER	SEM_L2_2_4nm_EM_slices140to765_cropped 267	253
RIVR	ADER	SEM_L2_2_4nm_EM_slices140to765_cropped 268	215
RIVR	ADER	SEM_L2_2_4nm_EM_slices140to765_cropped 269	230
RIVR	ADER	SEM_L2_2_4nm_EM_slices140to765_cropped 270	179
RIVR	ADER	SEM_L2_2_4nm_EM_slices140to765_cropped 271	259
RIVR	ADER	SEM_L2_2_4nm_EM_slices140to765_cropped 272	140
RIVR	ADER	SEM_L2_2_4nm_EM_slices140to765_cropped 273	124
RIVR	ADER	SEM_L2_2_4nm_EM_slices140to765_cropped 274	139
RIVR	ADER	SEM_L2_2_4nm_EM_slices140to765_cropped 275	132
RIVR	ADER	SEM_L2_2_4nm_EM_slices140to765_cropped 276	116
RIVR	ADER	SEM_L2_2_4nm_EM_slices140to765_cropped 277	127
RIVR	ADER	SEM_L2_2_4nm_EM_slices140to765_cropped 278	117
RIVR	ADER	SEM_L2_2_4nm_EM_slices140to765_cropped 279	116
RIVR	ADER	SEM_L2_2_4nm_EM_slices140to765_cropped 280	118
RIVR	ADER	SEM_L2_2_4nm_EM_slices140to765_cropped 281	118
RIVR	ADER	SEM_L2_2_4nm_EM_slices140to765_cropped 282	71
RIVR	ADER	SEM_L2_2_4nm_EM_slices140to765_cropped 283	63
RIVR	ADER	SEM_L2_2_4nm_EM_slices140to765_cropped 284	50
RIVR	ADER	SEM_L2_2_4nm_EM_slices140to765_cropped 290	35
RIVR	ADER	SEM_L2_2_4nm_EM_slices140to765_cropped 291	48
RIVR	ADER	SEM_L2_2_4nm_EM_slices140to765_cropped 317	52
RIVR	ADER	SEM_L2_2_4nm_EM_slices140to765_cropped 318	64
RIVR	ADER	SEM_L2_2_4nm_EM_slices140to765_cropped 319	79
RIVR	ADER	SEM_L2_2_4nm_EM_slices140to765_cropped 320	80
RIVR	ADER	SEM_L2_2_4nm_EM_slices140to765_cropped 322	78
RIVR	ADER	SEM_L2_2_4nm_EM_slices140to765_cropped 327	98
RIVR	ADER	SEM_L2_2_4nm_EM_slices140to765_cropped 332	68
RIVR	ADER	SEM_L2_2_4nm_EM_slices140to765_cropped 333	60
SDQR	ADER	SEM_L2_2_4nm_EM_slices140to765_cropped 238	78
SDQR	ADER	SEM_L2_2_4nm_EM_slices140to765_cropped 239	44
SDQR	ADER	SEM_L2_2_4nm_EM_slices140to765_cropped 240	42
SDQR	ADER	SEM_L2_2_4nm_EM_slices140to765_cropped 241	34
SDQR	ADER	SEM_L2_2_4nm_EM_slices140to765_cropped 242	41
SDQR	ADER	SEM_L2_2_4nm_EM_slices140to765_cropped 243	70
SDQR	ADER	SEM_L2_2_4nm_EM_slices140to765_cropped 244	70
SDQR	ADER	SEM_L2_2_4nm_EM_slices140to765_cropped 245	99
SDQR	ADER	SEM_L2_2_4nm_EM_slices140to765_cropped 246	62
SDQR	ADER	SEM_L2_2_4nm_EM_slices140to765_cropped 247	75
SDQR	ADER	SEM_L2_2_4nm_EM_slices140to765_cropped 248	119
SDQR	ADER	SEM_L2_2_4nm_EM_slices140to765_cropped 249	102
SDQR	ADER	SEM_L2_2_4nm_EM_slices140to765_cropped 250	142
SDQR	ADER	SEM_L2_2_4nm_EM_slices140to765_cropped 251	145
SDQR	ADER	SEM_L2_2_4nm_EM_slices140to765_cropped 252	136
SDQR	ADER	SEM_L2_2_4nm_EM_slices140to765_cropped 253	129
SDQR	ADER	SEM_L2_2_4nm_EM_slices140to765_cropped 254	77
SDQR	ADER	SEM_L2_2_4nm_EM_slices140to765_cropped 255	89
SDQR	ADER	SEM_L2_2_4nm_EM_slices140to765_cropped 256	72
SDQR	ADER	SEM_L2_2_4nm_EM_slices140to765_cropped 257	66
SDQR	ADER	SEM_L2_2_4nm_EM_slices140to765_cropped 258	59
SIADL	ADER	SEM_L2_2_4nm_EM_slices140to765_cropped 314	15
SIADL	ADER	SEM_L2_2_4nm_EM_slices140to765_cropped 316	2
SIADL	ADER	SEM_L2_2_4nm_EM_slices140to765_cropped 317	40
SIADL	ADER	SEM_L2_2_4nm_EM_slices140to765_cropped 318	14
SIADL	ADER	SEM_L2_2_4nm_EM_slices140to765_cropped 320	42
SIADL	ADER	SEM_L2_2_4nm_EM_slices140to765_cropped 322	43
SIBDL	ADER	SEM_L2_2_4nm_EM_slices140to765_cropped 287	25
SIBDL	ADER	SEM_L2_2_4nm_EM_slices140to765_cropped 288	92
SIBDL	ADER	SEM_L2_2_4nm_EM_slices140to765_cropped 289	80
SIBDL	ADER	SEM_L2_2_4nm_EM_slices140to765_cropped 290	96
SIBDL	ADER	SEM_L2_2_4nm_EM_slices140to765_cropped 291	114
SIBDL	ADER	SEM_L2_2_4nm_EM_slices140to765_cropped 292	75
SIBDL	ADER	SEM_L2_2_4nm_EM_slices140to765_cropped 293	65
SIBDL	ADER	SEM_L2_2_4nm_EM_slices140to765_cropped 294	55
SIBDL	ADER	SEM_L2_2_4nm_EM_slices140to765_cropped 295	30
SMBVR	ADER	SEM_L2_2_4nm_EM_slices140to765_cropped 261	59
SMBVR	ADER	SEM_L2_2_4nm_EM_slices140to765_cropped 262	143
SMBVR	ADER	SEM_L2_2_4nm_EM_slices140to765_cropped 263	231
SMBVR	ADER	SEM_L2_2_4nm_EM_slices140to765_cropped 264	247
SMBVR	ADER	SEM_L2_2_4nm_EM_slices140to765_cropped 265	247
SMBVR	ADER	SEM_L2_2_4nm_EM_slices140to765_cropped 266	300
SMBVR	ADER	SEM_L2_2_4nm_EM_slices140to765_cropped 267	311
SMBVR	ADER	SEM_L2_2_4nm_EM_slices140to765_cropped 268	321
SMBVR	ADER	SEM_L2_2_4nm_EM_slices140to765_cropped 269	348
SMBVR	ADER	SEM_L2_2_4nm_EM_slices140to765_cropped 270	343
SMBVR	ADER	SEM_L2_2_4nm_EM_slices140to765_cropped 271	249
SMBVR	ADER	SEM_L2_2_4nm_EM_slices140to765_cropped 272	211
SMBVR	ADER	SEM_L2_2_4nm_EM_slices140to765_cropped 273	169
ADAL	ADFL	SEM_L2_2_4nm_EM_slices140to765_cropped 345	8
ADAL	ADFL	SEM_L2_2_4nm_EM_slices140to765_cropped 346	66
ADAL	ADFL	SEM_L2_2_4nm_EM_slices140to765_cropped 347	50
ADAL	ADFL	SEM_L2_2_4nm_EM_slices140to765_cropped 348	35
ADAL	ADFL	SEM_L2_2_4nm_EM_slices140to765_cropped 349	32
ADAL	ADFL	SEM_L2_2_4nm_EM_slices140to765_cropped 350	55
ADAL	ADFL	SEM_L2_2_4nm_EM_slices140to765_cropped 351	47
ADAL	ADFL	SEM_L2_2_4nm_EM_slices140to765_cropped 352	50
ADAL	ADFL	SEM_L2_2_4nm_EM_slices140to765_cropped 353	78
ADAL	ADFL	SEM_L2_2_4nm_EM_slices140to765_cropped 354	32
ADAL	ADFL	SEM_L2_2_4nm_EM_slices140to765_cropped 365	58
ADAL	ADFL	SEM_L2_2_4nm_EM_slices140to765_cropped 366	112
ADAL	ADFL	SEM_L2_2_4nm_EM_slices140to765_cropped 367	141
ADAL	ADFL	SEM_L2_2_4nm_EM_slices140to765_cropped 368	138
ADAL	ADFL	SEM_L2_2_4nm_EM_slices140to765_cropped 369	147
ADAL	ADFL	SEM_L2_2_4nm_EM_slices140to765_cropped 370	157
ADAL	ADFL	SEM_L2_2_4nm_EM_slices140to765_cropped 371	115
ADAL	ADFL	SEM_L2_2_4nm_EM_slices140to765_cropped 372	106
ADAL	ADFL	SEM_L2_2_4nm_EM_slices140to765_cropped 373	104
ADAL	ADFL	SEM_L2_2_4nm_EM_slices140to765_cropped 374	60
ADAL	ADFL	SEM_L2_2_4nm_EM_slices140to765_cropped 375	66
ADAL	ADFL	SEM_L2_2_4nm_EM_slices140to765_cropped 376	48
ADFR	ADFL	SEM_L2_2_4nm_EM_slices140to765_cropped 185	167
ADFR	ADFL	SEM_L2_2_4nm_EM_slices140to765_cropped 186	184
ADFR	ADFL	SEM_L2_2_4nm_EM_slices140to765_cropped 187	233
ADFR	ADFL	SEM_L2_2_4nm_EM_slices140to765_cropped 188	276
ADFR	ADFL	SEM_L2_2_4nm_EM_slices140to765_cropped 189	268
ADFR	ADFL	SEM_L2_2_4nm_EM_slices140to765_cropped 190	324
ADFR	ADFL	SEM_L2_2_4nm_EM_slices140to765_cropped 191	309
ADFR	ADFL	SEM_L2_2_4nm_EM_slices140to765_cropped 192	302
ADFR	ADFL	SEM_L2_2_4nm_EM_slices140to765_cropped 193	308
ADFR	ADFL	SEM_L2_2_4nm_EM_slices140to765_cropped 194	241
ADFR	ADFL	SEM_L2_2_4nm_EM_slices140to765_cropped 195	150
AFDL	ADFL	SEM_L2_2_4nm_EM_slices140to765_cropped 257	93
AFDL	ADFL	SEM_L2_2_4nm_EM_slices140to765_cropped 258	251
AFDL	ADFL	SEM_L2_2_4nm_EM_slices140to765_cropped 259	292
AFDL	ADFL	SEM_L2_2_4nm_EM_slices140to765_cropped 260	306
AFDL	ADFL	SEM_L2_2_4nm_EM_slices140to765_cropped 261	305
AFDL	ADFL	SEM_L2_2_4nm_EM_slices140to765_cropped 262	267
AFDL	ADFL	SEM_L2_2_4nm_EM_slices140to765_cropped 263	290
AFDL	ADFL	SEM_L2_2_4nm_EM_slices140to765_cropped 264	288
AFDL	ADFL	SEM_L2_2_4nm_EM_slices140to765_cropped 265	296
AFDL	ADFL	SEM_L2_2_4nm_EM_slices140to765_cropped 266	261
AFDL	ADFL	SEM_L2_2_4nm_EM_slices140to765_cropped 267	252
AFDL	ADFL	SEM_L2_2_4nm_EM_slices140to765_cropped 268	305
AFDL	ADFL	SEM_L2_2_4nm_EM_slices140to765_cropped 269	270
AFDL	ADFL	SEM_L2_2_4nm_EM_slices140to765_cropped 270	233
AFDL	ADFL	SEM_L2_2_4nm_EM_slices140to765_cropped 271	220
AFDL	ADFL	SEM_L2_2_4nm_EM_slices140to765_cropped 272	204
AFDL	ADFL	SEM_L2_2_4nm_EM_slices140to765_cropped 273	191
AFDL	ADFL	SEM_L2_2_4nm_EM_slices140to765_cropped 274	200
AFDL	ADFL	SEM_L2_2_4nm_EM_slices140to765_cropped 275	200
AFDL	ADFL	SEM_L2_2_4nm_EM_slices140to765_cropped 276	191
AFDL	ADFL	SEM_L2_2_4nm_EM_slices140to765_cropped 277	181
AFDL	ADFL	SEM_L2_2_4nm_EM_slices140to765_cropped 278	135
AFDL	ADFL	SEM_L2_2_4nm_EM_slices140to765_cropped 323	161
AFDL	ADFL	SEM_L2_2_4nm_EM_slices140to765_cropped 324	182
AFDL	ADFL	SEM_L2_2_4nm_EM_slices140to765_cropped 325	212
AFDL	ADFL	SEM_L2_2_4nm_EM_slices140to765_cropped 326	292
AFDL	ADFL	SEM_L2_2_4nm_EM_slices140to765_cropped 327	320
AFDL	ADFL	SEM_L2_2_4nm_EM_slices140to765_cropped 328	361
AFDL	ADFL	SEM_L2_2_4nm_EM_slices140to765_cropped 329	335
AFDL	ADFL	SEM_L2_2_4nm_EM_slices140to765_cropped 330	325
AFDL	ADFL	SEM_L2_2_4nm_EM_slices140to765_cropped 331	283
AFDL	ADFL	SEM_L2_2_4nm_EM_slices140to765_cropped 332	249
AIAL	ADFL	SEM_L2_2_4nm_EM_slices140to765_cropped 205	437
AIAL	ADFL	SEM_L2_2_4nm_EM_slices140to765_cropped 206	372
AIAL	ADFL	SEM_L2_2_4nm_EM_slices140to765_cropped 207	329
AIAL	ADFL	SEM_L2_2_4nm_EM_slices140to765_cropped 208	147
AIAL	ADFL	SEM_L2_2_4nm_EM_slices140to765_cropped 208	29
AIAL	ADFL	SEM_L2_2_4nm_EM_slices140to765_cropped 209	145
AIAL	ADFL	SEM_L2_2_4nm_EM_slices140to765_cropped 211	34
AIAL	ADFL	SEM_L2_2_4nm_EM_slices140to765_cropped 236	2
AIAL	ADFL	SEM_L2_2_4nm_EM_slices140to765_cropped 237	101
AIAL	ADFL	SEM_L2_2_4nm_EM_slices140to765_cropped 238	88
AIAL	ADFL	SEM_L2_2_4nm_EM_slices140to765_cropped 239	2
AIBL	ADFL	SEM_L2_2_4nm_EM_slices140to765_cropped 181	91
AIBL	ADFL	SEM_L2_2_4nm_EM_slices140to765_cropped 182	91
AIBL	ADFL	SEM_L2_2_4nm_EM_slices140to765_cropped 183	90
AIBL	ADFL	SEM_L2_2_4nm_EM_slices140to765_cropped 184	116
AIBL	ADFL	SEM_L2_2_4nm_EM_slices140to765_cropped 185	119
AIBL	ADFL	SEM_L2_2_4nm_EM_slices140to765_cropped 186	120
AIBL	ADFL	SEM_L2_2_4nm_EM_slices140to765_cropped 187	116
AIBL	ADFL	SEM_L2_2_4nm_EM_slices140to765_cropped 188	141
AIBL	ADFL	SEM_L2_2_4nm_EM_slices140to765_cropped 189	154
AIBL	ADFL	SEM_L2_2_4nm_EM_slices140to765_cropped 190	150
AIBL	ADFL	SEM_L2_2_4nm_EM_slices140to765_cropped 191	143
AIBL	ADFL	SEM_L2_2_4nm_EM_slices140to765_cropped 192	190
AIBL	ADFL	SEM_L2_2_4nm_EM_slices140to765_cropped 193	150
AIBL	ADFL	SEM_L2_2_4nm_EM_slices140to765_cropped 208	39
AIZL	ADFL	SEM_L2_2_4nm_EM_slices140to765_cropped 191	40
AIZL	ADFL	SEM_L2_2_4nm_EM_slices140to765_cropped 192	20
AIZL	ADFL	SEM_L2_2_4nm_EM_slices140to765_cropped 193	18
AIZL	ADFL	SEM_L2_2_4nm_EM_slices140to765_cropped 201	331
AIZL	ADFL	SEM_L2_2_4nm_EM_slices140to765_cropped 202	414
AIZL	ADFL	SEM_L2_2_4nm_EM_slices140to765_cropped 203	390
AIZL	ADFL	SEM_L2_2_4nm_EM_slices140to765_cropped 204	329
AIZL	ADFL	SEM_L2_2_4nm_EM_slices140to765_cropped 205	533
AIZL	ADFL	SEM_L2_2_4nm_EM_slices140to765_cropped 206	559
AIZL	ADFL	SEM_L2_2_4nm_EM_slices140to765_cropped 207	445
AIZL	ADFL	SEM_L2_2_4nm_EM_slices140to765_cropped 208	581
AIZL	ADFL	SEM_L2_2_4nm_EM_slices140to765_cropped 209	98
AIZL	ADFL	SEM_L2_2_4nm_EM_slices140to765_cropped 210	14
AIZL	ADFL	SEM_L2_2_4nm_EM_slices140to765_cropped 211	184
AIZL	ADFL	SEM_L2_2_4nm_EM_slices140to765_cropped 212	50
AIZL	ADFL	SEM_L2_2_4nm_EM_slices140to765_cropped 213	94
AIZL	ADFL	SEM_L2_2_4nm_EM_slices140to765_cropped 214	102
AIZL	ADFL	SEM_L2_2_4nm_EM_slices140to765_cropped 215	104
AIZL	ADFL	SEM_L2_2_4nm_EM_slices140to765_cropped 216	160
AIZL	ADFL	SEM_L2_2_4nm_EM_slices140to765_cropped 217	143
AIZL	ADFL	SEM_L2_2_4nm_EM_slices140to765_cropped 218	209
AIZL	ADFL	SEM_L2_2_4nm_EM_slices140to765_cropped 219	189
AIZL	ADFL	SEM_L2_2_4nm_EM_slices140to765_cropped 220	188
AIZL	ADFL	SEM_L2_2_4nm_EM_slices140to765_cropped 221	154
AIZL	ADFL	SEM_L2_2_4nm_EM_slices140to765_cropped 222	154
AIZL	ADFL	SEM_L2_2_4nm_EM_slices140to765_cropped 223	111
AIZL	ADFL	SEM_L2_2_4nm_EM_slices140to765_cropped 224	63
AIZL	ADFL	SEM_L2_2_4nm_EM_slices140to765_cropped 225	82
AIZL	ADFL	SEM_L2_2_4nm_EM_slices140to765_cropped 226	60
AIZL	ADFL	SEM_L2_2_4nm_EM_slices140to765_cropped 227	20
AIZL	ADFL	SEM_L2_2_4nm_EM_slices140to765_cropped 228	38
AIZL	ADFL	SEM_L2_2_4nm_EM_slices140to765_cropped 229	13
AIZL	ADFL	SEM_L2_2_4nm_EM_slices140to765_cropped 231	11
AIZL	ADFL	SEM_L2_2_4nm_EM_slices140to765_cropped 235	38
AIZL	ADFL	SEM_L2_2_4nm_EM_slices140to765_cropped 236	38
AIZL	ADFL	SEM_L2_2_4nm_EM_slices140to765_cropped 237	10
AIZL	ADFL	SEM_L2_2_4nm_EM_slices140to765_cropped 239	118
AIZL	ADFL	SEM_L2_2_4nm_EM_slices140to765_cropped 240	66
AIZL	ADFL	SEM_L2_2_4nm_EM_slices140to765_cropped 241	134
AIZL	ADFL	SEM_L2_2_4nm_EM_slices140to765_cropped 242	184
AIZL	ADFL	SEM_L2_2_4nm_EM_slices140to765_cropped 243	156
AIZL	ADFL	SEM_L2_2_4nm_EM_slices140to765_cropped 244	115
AIZL	ADFL	SEM_L2_2_4nm_EM_slices140to765_cropped 244	36
AIZL	ADFL	SEM_L2_2_4nm_EM_slices140to765_cropped 245	299
AIZL	ADFL	SEM_L2_2_4nm_EM_slices140to765_cropped 245	60
AIZL	ADFL	SEM_L2_2_4nm_EM_slices140to765_cropped 245	135
AIZL	ADFL	SEM_L2_2_4nm_EM_slices140to765_cropped 246	273
AIZL	ADFL	SEM_L2_2_4nm_EM_slices140to765_cropped 246	48
AIZL	ADFL	SEM_L2_2_4nm_EM_slices140to765_cropped 246	219
AIZL	ADFL	SEM_L2_2_4nm_EM_slices140to765_cropped 247	196
AIZL	ADFL	SEM_L2_2_4nm_EM_slices140to765_cropped 247	81
AIZL	ADFL	SEM_L2_2_4nm_EM_slices140to765_cropped 247	166
AIZL	ADFL	SEM_L2_2_4nm_EM_slices140to765_cropped 248	425
AIZL	ADFL	SEM_L2_2_4nm_EM_slices140to765_cropped 248	52
AIZL	ADFL	SEM_L2_2_4nm_EM_slices140to765_cropped 248	173
AIZL	ADFL	SEM_L2_2_4nm_EM_slices140to765_cropped 249	418
AIZL	ADFL	SEM_L2_2_4nm_EM_slices140to765_cropped 249	30
AIZL	ADFL	SEM_L2_2_4nm_EM_slices140to765_cropped 249	219
AIZL	ADFL	SEM_L2_2_4nm_EM_slices140to765_cropped 250	329
AIZL	ADFL	SEM_L2_2_4nm_EM_slices140to765_cropped 250	49
AIZL	ADFL	SEM_L2_2_4nm_EM_slices140to765_cropped 250	211
AIZL	ADFL	SEM_L2_2_4nm_EM_slices140to765_cropped 251	374
AIZL	ADFL	SEM_L2_2_4nm_EM_slices140to765_cropped 252	262
AIZL	ADFL	SEM_L2_2_4nm_EM_slices140to765_cropped 253	12
AIZL	ADFL	SEM_L2_2_4nm_EM_slices140to765_cropped 257	45
AIZL	ADFL	SEM_L2_2_4nm_EM_slices140to765_cropped 258	8
AIZL	ADFL	SEM_L2_2_4nm_EM_slices140to765_cropped 259	62
AIZL	ADFL	SEM_L2_2_4nm_EM_slices140to765_cropped 260	61
AIZL	ADFL	SEM_L2_2_4nm_EM_slices140to765_cropped 261	52
AIZL	ADFL	SEM_L2_2_4nm_EM_slices140to765_cropped 263	27
AIZL	ADFL	SEM_L2_2_4nm_EM_slices140to765_cropped 264	50
AIZL	ADFL	SEM_L2_2_4nm_EM_slices140to765_cropped 265	77
AIZL	ADFL	SEM_L2_2_4nm_EM_slices140to765_cropped 266	92
AIZL	ADFL	SEM_L2_2_4nm_EM_slices140to765_cropped 267	85
AIZL	ADFL	SEM_L2_2_4nm_EM_slices140to765_cropped 268	90
AIZL	ADFL	SEM_L2_2_4nm_EM_slices140to765_cropped 269	50
AIZL	ADFL	SEM_L2_2_4nm_EM_slices140to765_cropped 270	48
AIZL	ADFL	SEM_L2_2_4nm_EM_slices140to765_cropped 271	28
AIZL	ADFL	SEM_L2_2_4nm_EM_slices140to765_cropped 272	14
AIZL	ADFL	SEM_L2_2_4nm_EM_slices140to765_cropped 273	49
AIZL	ADFL	SEM_L2_2_4nm_EM_slices140to765_cropped 274	38
AIZL	ADFL	SEM_L2_2_4nm_EM_slices140to765_cropped 275	66
AIZL	ADFL	SEM_L2_2_4nm_EM_slices140to765_cropped 276	65
AIZL	ADFL	SEM_L2_2_4nm_EM_slices140to765_cropped 277	54
AIZL	ADFL	SEM_L2_2_4nm_EM_slices140to765_cropped 278	31
AIZL	ADFL	SEM_L2_2_4nm_EM_slices140to765_cropped 282	30
AIZL	ADFL	SEM_L2_2_4nm_EM_slices140to765_cropped 283	105
AIZL	ADFL	SEM_L2_2_4nm_EM_slices140to765_cropped 285	54
AIZL	ADFL	SEM_L2_2_4nm_EM_slices140to765_cropped 286	94
AIZL	ADFL	SEM_L2_2_4nm_EM_slices140to765_cropped 287	124
AIZL	ADFL	SEM_L2_2_4nm_EM_slices140to765_cropped 288	137
AIZL	ADFL	SEM_L2_2_4nm_EM_slices140to765_cropped 289	146
AIZL	ADFL	SEM_L2_2_4nm_EM_slices140to765_cropped 290	154
AIZL	ADFL	SEM_L2_2_4nm_EM_slices140to765_cropped 292	174
AIZL	ADFL	SEM_L2_2_4nm_EM_slices140to765_cropped 293	207
AIZL	ADFL	SEM_L2_2_4nm_EM_slices140to765_cropped 294	187
AIZL	ADFL	SEM_L2_2_4nm_EM_slices140to765_cropped 295	177
AIZL	ADFL	SEM_L2_2_4nm_EM_slices140to765_cropped 296	227
AIZL	ADFL	SEM_L2_2_4nm_EM_slices140to765_cropped 297	215
AIZL	ADFL	SEM_L2_2_4nm_EM_slices140to765_cropped 298	240
AIZL	ADFL	SEM_L2_2_4nm_EM_slices140to765_cropped 299	153
AIZL	ADFL	SEM_L2_2_4nm_EM_slices140to765_cropped 300	219
AIZL	ADFL	SEM_L2_2_4nm_EM_slices140to765_cropped 301	206
AIZL	ADFL	SEM_L2_2_4nm_EM_slices140to765_cropped 302	205
AIZL	ADFL	SEM_L2_2_4nm_EM_slices140to765_cropped 303	178
AIZL	ADFL	SEM_L2_2_4nm_EM_slices140to765_cropped 304	120
AIZL	ADFL	SEM_L2_2_4nm_EM_slices140to765_cropped 304	144
AIZL	ADFL	SEM_L2_2_4nm_EM_slices140to765_cropped 305	350
AIZL	ADFL	SEM_L2_2_4nm_EM_slices140to765_cropped 306	328
AIZL	ADFL	SEM_L2_2_4nm_EM_slices140to765_cropped 307	376
AIZL	ADFL	SEM_L2_2_4nm_EM_slices140to765_cropped 308	376
AIZL	ADFL	SEM_L2_2_4nm_EM_slices140to765_cropped 309	367
AIZL	ADFL	SEM_L2_2_4nm_EM_slices140to765_cropped 310	449
AIZL	ADFL	SEM_L2_2_4nm_EM_slices140to765_cropped 311	430
AIZL	ADFL	SEM_L2_2_4nm_EM_slices140to765_cropped 312	165
AIZL	ADFL	SEM_L2_2_4nm_EM_slices140to765_cropped 312	267
AIZL	ADFL	SEM_L2_2_4nm_EM_slices140to765_cropped 313	94
AIZL	ADFL	SEM_L2_2_4nm_EM_slices140to765_cropped 313	282
AIZL	ADFL	SEM_L2_2_4nm_EM_slices140to765_cropped 314	36
AIZL	ADFL	SEM_L2_2_4nm_EM_slices140to765_cropped 314	249
AIZL	ADFL	SEM_L2_2_4nm_EM_slices140to765_cropped 315	15
AIZL	ADFL	SEM_L2_2_4nm_EM_slices140to765_cropped 315	256
AIZL	ADFL	SEM_L2_2_4nm_EM_slices140to765_cropped 316	263
AIZL	ADFL	SEM_L2_2_4nm_EM_slices140to765_cropped 317	178
AIZL	ADFL	SEM_L2_2_4nm_EM_slices140to765_cropped 318	196
AIZL	ADFL	SEM_L2_2_4nm_EM_slices140to765_cropped 319	148
AIZL	ADFL	SEM_L2_2_4nm_EM_slices140to765_cropped 320	112
AIZL	ADFL	SEM_L2_2_4nm_EM_slices140to765_cropped 321	205
AIZL	ADFL	SEM_L2_2_4nm_EM_slices140to765_cropped 322	137
AIZL	ADFL	SEM_L2_2_4nm_EM_slices140to765_cropped 324	187
AIZL	ADFL	SEM_L2_2_4nm_EM_slices140to765_cropped 325	181
AIZL	ADFL	SEM_L2_2_4nm_EM_slices140to765_cropped 326	166
AIZL	ADFL	SEM_L2_2_4nm_EM_slices140to765_cropped 327	168
AIZL	ADFL	SEM_L2_2_4nm_EM_slices140to765_cropped 328	134
AIZL	ADFL	SEM_L2_2_4nm_EM_slices140to765_cropped 329	124
AIZL	ADFL	SEM_L2_2_4nm_EM_slices140to765_cropped 330	102
AIZL	ADFL	SEM_L2_2_4nm_EM_slices140to765_cropped 331	57
AIZL	ADFL	SEM_L2_2_4nm_EM_slices140to765_cropped 357	18
AIZL	ADFL	SEM_L2_2_4nm_EM_slices140to765_cropped 358	30
AIZL	ADFL	SEM_L2_2_4nm_EM_slices140to765_cropped 359	41
AIZL	ADFL	SEM_L2_2_4nm_EM_slices140to765_cropped 360	97
AIZL	ADFL	SEM_L2_2_4nm_EM_slices140to765_cropped 361	81
AIZL	ADFL	SEM_L2_2_4nm_EM_slices140to765_cropped 362	112
AIZL	ADFL	SEM_L2_2_4nm_EM_slices140to765_cropped 363	105
AIZL	ADFL	SEM_L2_2_4nm_EM_slices140to765_cropped 364	84
AIZL	ADFL	SEM_L2_2_4nm_EM_slices140to765_cropped 365	134
AIZL	ADFL	SEM_L2_2_4nm_EM_slices140to765_cropped 366	126
AIZL	ADFL	SEM_L2_2_4nm_EM_slices140to765_cropped 367	106
AIZL	ADFL	SEM_L2_2_4nm_EM_slices140to765_cropped 368	106
AIZL	ADFL	SEM_L2_2_4nm_EM_slices140to765_cropped 369	84
AIZL	ADFL	SEM_L2_2_4nm_EM_slices140to765_cropped 370	68
AIZL	ADFL	SEM_L2_2_4nm_EM_slices140to765_cropped 371	53
AIZL	ADFL	SEM_L2_2_4nm_EM_slices140to765_cropped 372	28
AIZL	ADFL	SEM_L2_2_4nm_EM_slices140to765_cropped 384	22
AIZL	ADFL	SEM_L2_2_4nm_EM_slices140to765_cropped 385	33
AIZL	ADFL	SEM_L2_2_4nm_EM_slices140to765_cropped 386	26
AIZL	ADFL	SEM_L2_2_4nm_EM_slices140to765_cropped 387	70
AIZL	ADFL	SEM_L2_2_4nm_EM_slices140to765_cropped 388	82
AIZL	ADFL	SEM_L2_2_4nm_EM_slices140to765_cropped 389	99
AIZL	ADFL	SEM_L2_2_4nm_EM_slices140to765_cropped 390	112
AIZL	ADFL	SEM_L2_2_4nm_EM_slices140to765_cropped 391	120
AIZL	ADFL	SEM_L2_2_4nm_EM_slices140to765_cropped 392	123
AIZL	ADFL	SEM_L2_2_4nm_EM_slices140to765_cropped 393	107
AIZL	ADFL	SEM_L2_2_4nm_EM_slices140to765_cropped 394	118
AIZL	ADFL	SEM_L2_2_4nm_EM_slices140to765_cropped 395	108
AIZL	ADFL	SEM_L2_2_4nm_EM_slices140to765_cropped 396	105
AIZL	ADFL	SEM_L2_2_4nm_EM_slices140to765_cropped 397	95
AIZL	ADFL	SEM_L2_2_4nm_EM_slices140to765_cropped 398	77
AIZL	ADFL	SEM_L2_2_4nm_EM_slices140to765_cropped 399	58
AIZL	ADFL	SEM_L2_2_4nm_EM_slices140to765_cropped 400	64
AIZL	ADFL	SEM_L2_2_4nm_EM_slices140to765_cropped 401	60
AIZL	ADFL	SEM_L2_2_4nm_EM_slices140to765_cropped 402	52
AIZL	ADFL	SEM_L2_2_4nm_EM_slices140to765_cropped 403	67
AIZL	ADFL	SEM_L2_2_4nm_EM_slices140to765_cropped 404	76
AIZL	ADFL	SEM_L2_2_4nm_EM_slices140to765_cropped 405	56
AIZL	ADFL	SEM_L2_2_4nm_EM_slices140to765_cropped 406	71
AIZL	ADFL	SEM_L2_2_4nm_EM_slices140to765_cropped 407	133
AIZL	ADFL	SEM_L2_2_4nm_EM_slices140to765_cropped 408	98
AIZL	ADFL	SEM_L2_2_4nm_EM_slices140to765_cropped 409	123
AIZL	ADFL	SEM_L2_2_4nm_EM_slices140to765_cropped 410	107
AIZL	ADFL	SEM_L2_2_4nm_EM_slices140to765_cropped 411	83
AIZL	ADFL	SEM_L2_2_4nm_EM_slices140to765_cropped 412	76
AIZL	ADFL	SEM_L2_2_4nm_EM_slices140to765_cropped 413	30
AIZL	ADFL	SEM_L2_2_4nm_EM_slices140to765_cropped 414	80
AIZL	ADFL	SEM_L2_2_4nm_EM_slices140to765_cropped 415	82
AIZL	ADFL	SEM_L2_2_4nm_EM_slices140to765_cropped 416	89
AIZL	ADFL	SEM_L2_2_4nm_EM_slices140to765_cropped 417	90
AIZL	ADFL	SEM_L2_2_4nm_EM_slices140to765_cropped 418	106
AIZL	ADFL	SEM_L2_2_4nm_EM_slices140to765_cropped 419	96
AIZL	ADFL	SEM_L2_2_4nm_EM_slices140to765_cropped 420	82
AIZL	ADFL	SEM_L2_2_4nm_EM_slices140to765_cropped 421	86
AIZL	ADFL	SEM_L2_2_4nm_EM_slices140to765_cropped 422	62
AIZL	ADFL	SEM_L2_2_4nm_EM_slices140to765_cropped 423	43
AIZL	ADFL	SEM_L2_2_4nm_EM_slices140to765_cropped 424	64
AIZL	ADFL	SEM_L2_2_4nm_EM_slices140to765_cropped 425	58
AIZL	ADFL	SEM_L2_2_4nm_EM_slices140to765_cropped 426	69
AIZL	ADFL	SEM_L2_2_4nm_EM_slices140to765_cropped 427	51
AIZL	ADFL	SEM_L2_2_4nm_EM_slices140to765_cropped 428	82
AIZL	ADFL	SEM_L2_2_4nm_EM_slices140to765_cropped 429	97
AIZL	ADFL	SEM_L2_2_4nm_EM_slices140to765_cropped 430	63
AIZL	ADFL	SEM_L2_2_4nm_EM_slices140to765_cropped 431	119
AIZL	ADFL	SEM_L2_2_4nm_EM_slices140to765_cropped 432	58
AIZL	ADFL	SEM_L2_2_4nm_EM_slices140to765_cropped 433	187
AIZL	ADFL	SEM_L2_2_4nm_EM_slices140to765_cropped 434	132
AIZL	ADFL	SEM_L2_2_4nm_EM_slices140to765_cropped 435	135
AIZL	ADFL	SEM_L2_2_4nm_EM_slices140to765_cropped 436	131
AIZL	ADFL	SEM_L2_2_4nm_EM_slices140to765_cropped 437	134
AIZL	ADFL	SEM_L2_2_4nm_EM_slices140to765_cropped 438	71
AIZL	ADFL	SEM_L2_2_4nm_EM_slices140to765_cropped 439	146
AIZL	ADFL	SEM_L2_2_4nm_EM_slices140to765_cropped 440	109
AIZL	ADFL	SEM_L2_2_4nm_EM_slices140to765_cropped 441	122
AIZL	ADFL	SEM_L2_2_4nm_EM_slices140to765_cropped 442	158
AIZL	ADFL	SEM_L2_2_4nm_EM_slices140to765_cropped 443	129
AIZL	ADFL	SEM_L2_2_4nm_EM_slices140to765_cropped 444	114
AIZL	ADFL	SEM_L2_2_4nm_EM_slices140to765_cropped 445	98
AIZL	ADFL	SEM_L2_2_4nm_EM_slices140to765_cropped 446	95
AIZL	ADFL	SEM_L2_2_4nm_EM_slices140to765_cropped 447	91
AIZL	ADFL	SEM_L2_2_4nm_EM_slices140to765_cropped 448	88
AIZL	ADFL	SEM_L2_2_4nm_EM_slices140to765_cropped 449	88
AIZL	ADFL	SEM_L2_2_4nm_EM_slices140to765_cropped 450	101
AIZL	ADFL	SEM_L2_2_4nm_EM_slices140to765_cropped 451	104
AIZL	ADFL	SEM_L2_2_4nm_EM_slices140to765_cropped 452	101
AIZL	ADFL	SEM_L2_2_4nm_EM_slices140to765_cropped 453	102
AIZL	ADFL	SEM_L2_2_4nm_EM_slices140to765_cropped 454	102
AIZL	ADFL	SEM_L2_2_4nm_EM_slices140to765_cropped 455	110
AIZL	ADFL	SEM_L2_2_4nm_EM_slices140to765_cropped 456	132
AIZL	ADFL	SEM_L2_2_4nm_EM_slices140to765_cropped 457	129
AIZL	ADFL	SEM_L2_2_4nm_EM_slices140to765_cropped 458	123
ASEL	ADFL	SEM_L2_2_4nm_EM_slices140to765_cropped 202	32
ASEL	ADFL	SEM_L2_2_4nm_EM_slices140to765_cropped 203	66
ASEL	ADFL	SEM_L2_2_4nm_EM_slices140to765_cropped 204	137
ASEL	ADFL	SEM_L2_2_4nm_EM_slices140to765_cropped 205	154
ASEL	ADFL	SEM_L2_2_4nm_EM_slices140to765_cropped 206	127
ASEL	ADFL	SEM_L2_2_4nm_EM_slices140to765_cropped 207	45
ASEL	ADFL	SEM_L2_2_4nm_EM_slices140to765_cropped 208	129
AUAL	ADFL	SEM_L2_2_4nm_EM_slices140to765_cropped 188	40
AUAL	ADFL	SEM_L2_2_4nm_EM_slices140to765_cropped 189	112
AUAL	ADFL	SEM_L2_2_4nm_EM_slices140to765_cropped 190	226
AUAL	ADFL	SEM_L2_2_4nm_EM_slices140to765_cropped 191	106
AUAL	ADFL	SEM_L2_2_4nm_EM_slices140to765_cropped 191	148
AUAL	ADFL	SEM_L2_2_4nm_EM_slices140to765_cropped 191	78
AUAL	ADFL	SEM_L2_2_4nm_EM_slices140to765_cropped 192	416
AUAL	ADFL	SEM_L2_2_4nm_EM_slices140to765_cropped 192	105
AUAL	ADFL	SEM_L2_2_4nm_EM_slices140to765_cropped 193	26
AUAL	ADFL	SEM_L2_2_4nm_EM_slices140to765_cropped 193	360
AUAL	ADFL	SEM_L2_2_4nm_EM_slices140to765_cropped 194	16
AUAL	ADFL	SEM_L2_2_4nm_EM_slices140to765_cropped 194	250
AUAL	ADFL	SEM_L2_2_4nm_EM_slices140to765_cropped 195	153
AUAL	ADFL	SEM_L2_2_4nm_EM_slices140to765_cropped 241	100
AUAL	ADFL	SEM_L2_2_4nm_EM_slices140to765_cropped 241	119
AUAL	ADFL	SEM_L2_2_4nm_EM_slices140to765_cropped 242	65
AUAL	ADFL	SEM_L2_2_4nm_EM_slices140to765_cropped 242	304
AUAL	ADFL	SEM_L2_2_4nm_EM_slices140to765_cropped 243	144
AUAL	ADFL	SEM_L2_2_4nm_EM_slices140to765_cropped 243	377
AUAL	ADFL	SEM_L2_2_4nm_EM_slices140to765_cropped 244	131
AUAL	ADFL	SEM_L2_2_4nm_EM_slices140to765_cropped 244	152
AUAL	ADFL	SEM_L2_2_4nm_EM_slices140to765_cropped 244	342
AUAL	ADFL	SEM_L2_2_4nm_EM_slices140to765_cropped 245	159
AUAL	ADFL	SEM_L2_2_4nm_EM_slices140to765_cropped 245	323
AUAL	ADFL	SEM_L2_2_4nm_EM_slices140to765_cropped 246	135
AUAL	ADFL	SEM_L2_2_4nm_EM_slices140to765_cropped 246	449
AUAL	ADFL	SEM_L2_2_4nm_EM_slices140to765_cropped 247	82
AUAL	ADFL	SEM_L2_2_4nm_EM_slices140to765_cropped 247	110
AUAL	ADFL	SEM_L2_2_4nm_EM_slices140to765_cropped 247	446
AUAL	ADFL	SEM_L2_2_4nm_EM_slices140to765_cropped 248	53
AUAL	ADFL	SEM_L2_2_4nm_EM_slices140to765_cropped 248	444
AUAL	ADFL	SEM_L2_2_4nm_EM_slices140to765_cropped 249	359
AUAL	ADFL	SEM_L2_2_4nm_EM_slices140to765_cropped 250	329
AUAL	ADFL	SEM_L2_2_4nm_EM_slices140to765_cropped 251	245
AUAL	ADFL	SEM_L2_2_4nm_EM_slices140to765_cropped 252	248
AUAL	ADFL	SEM_L2_2_4nm_EM_slices140to765_cropped 253	250
AUAL	ADFL	SEM_L2_2_4nm_EM_slices140to765_cropped 254	105
AUAL	ADFL	SEM_L2_2_4nm_EM_slices140to765_cropped 255	227
AUAL	ADFL	SEM_L2_2_4nm_EM_slices140to765_cropped 255	232
AUAL	ADFL	SEM_L2_2_4nm_EM_slices140to765_cropped 256	134
AUAL	ADFL	SEM_L2_2_4nm_EM_slices140to765_cropped 256	112
AUAL	ADFL	SEM_L2_2_4nm_EM_slices140to765_cropped 257	93
AUAL	ADFL	SEM_L2_2_4nm_EM_slices140to765_cropped 258	110
AUAL	ADFL	SEM_L2_2_4nm_EM_slices140to765_cropped 259	129
AUAL	ADFL	SEM_L2_2_4nm_EM_slices140to765_cropped 260	120
AUAL	ADFL	SEM_L2_2_4nm_EM_slices140to765_cropped 261	143
AUAL	ADFL	SEM_L2_2_4nm_EM_slices140to765_cropped 262	170
AUAL	ADFL	SEM_L2_2_4nm_EM_slices140to765_cropped 263	149
AUAL	ADFL	SEM_L2_2_4nm_EM_slices140to765_cropped 264	154
AUAL	ADFL	SEM_L2_2_4nm_EM_slices140to765_cropped 265	85
AUAL	ADFL	SEM_L2_2_4nm_EM_slices140to765_cropped 266	119
AUAL	ADFL	SEM_L2_2_4nm_EM_slices140to765_cropped 267	144
AUAL	ADFL	SEM_L2_2_4nm_EM_slices140to765_cropped 268	154
AUAL	ADFL	SEM_L2_2_4nm_EM_slices140to765_cropped 269	164
AUAL	ADFL	SEM_L2_2_4nm_EM_slices140to765_cropped 270	136
AUAL	ADFL	SEM_L2_2_4nm_EM_slices140to765_cropped 271	143
AUAL	ADFL	SEM_L2_2_4nm_EM_slices140to765_cropped 272	150
AUAL	ADFL	SEM_L2_2_4nm_EM_slices140to765_cropped 273	142
AUAL	ADFL	SEM_L2_2_4nm_EM_slices140to765_cropped 274	125
AUAL	ADFL	SEM_L2_2_4nm_EM_slices140to765_cropped 275	126
AUAL	ADFL	SEM_L2_2_4nm_EM_slices140to765_cropped 276	167
AUAL	ADFL	SEM_L2_2_4nm_EM_slices140to765_cropped 277	127
AUAL	ADFL	SEM_L2_2_4nm_EM_slices140to765_cropped 278	185
AUAL	ADFL	SEM_L2_2_4nm_EM_slices140to765_cropped 279	211
AUAL	ADFL	SEM_L2_2_4nm_EM_slices140to765_cropped 280	222
AUAL	ADFL	SEM_L2_2_4nm_EM_slices140to765_cropped 281	196
AUAL	ADFL	SEM_L2_2_4nm_EM_slices140to765_cropped 282	184
AUAL	ADFL	SEM_L2_2_4nm_EM_slices140to765_cropped 283	181
AUAL	ADFL	SEM_L2_2_4nm_EM_slices140to765_cropped 287	126
AUAL	ADFL	SEM_L2_2_4nm_EM_slices140to765_cropped 288	140
AUAL	ADFL	SEM_L2_2_4nm_EM_slices140to765_cropped 289	166
AUAL	ADFL	SEM_L2_2_4nm_EM_slices140to765_cropped 290	168
[truncated: 158,615 more rows]
