# Supplementary material for: Exploring neurodevelopment via spatiotemporal collation of anatomical networks with NeuroSC
Source: eLife. 2025 Oct 21;13:RP103977. doi: 10.7554/eLife.103977 (PMC12539806; doi:10.7554/eLife.103977)
Supplement: Supplementary file 11. — Type the name of a ‘Neuron of Interest’ (NOI) in the indicated cell to filter for the summed adjacency counts for each contact partner. For each partner, there are two columns: Total number of contacts (number of EM sections NOI and partner are in contact) and Total Weights (summed number of pixels NOI and partner contacts). [file elife-103977-supp11.xlsx]

## Sheet: Adjacency_TEM_L3_Renamed_p10_he
Neuron1	Neuron2	Section	Weight				Partner	# of contacts	Total Weights
Label 1	Label 27	TEM_L3_2_EM_slices1to325 132	109		<Write your NOI>		ADAL	0	#N/A
Label 1	Label 27	TEM_L3_2_EM_slices1to325 133	104				ADAR	0	#N/A
Label 1	Label 27	TEM_L3_2_EM_slices1to325 134	104		Label:		ADEL	0	#N/A
Label 1	Label 27	TEM_L3_2_EM_slices1to325 137	156		#N/A		ADER	0	#N/A
Label 1	Label 81	TEM_L3_2_EM_slices1to325 157	64				ADFL	0	#N/A
Label 1	Label 152	TEM_L3_2_EM_slices1to325 132	76				ADFR	0	#N/A
Label 1	Label 152	TEM_L3_2_EM_slices1to325 133	44				ADLL	0	#N/A
Label 1	Label 152	TEM_L3_2_EM_slices1to325 133	39				ADLR	0	#N/A
Label 1	Label 154	TEM_L3_2_EM_slices1to325 121	24				AFDL	0	#N/A
Label 1	Label 154	TEM_L3_2_EM_slices1to325 122	22				AFDR	0	#N/A
Label 1	Label 154	TEM_L3_2_EM_slices1to325 123	46				AIAL	0	#N/A
Label 1	Label 154	TEM_L3_2_EM_slices1to325 124	45				AIAR	0	#N/A
Label 1	Label 154	TEM_L3_2_EM_slices1to325 125	27				AIBL	0	#N/A
Label 1	Label 154	TEM_L3_2_EM_slices1to325 126	23				AIBR	0	#N/A
Label 1	Label 163	TEM_L3_2_EM_slices1to325 134	218				AIML	0	#N/A
Label 1	Label 163	TEM_L3_2_EM_slices1to325 137	535				AIMR	0	#N/A
Label 1	Label 163	TEM_L3_2_EM_slices1to325 157	12				AINL	0	#N/A
Label 1	Label 203	TEM_L3_2_EM_slices1to325 157	153				AINR	0	#N/A
Label 1	Label 204	TEM_L3_2_EM_slices1to325 137	495				AIYL	0	#N/A
Label 1	Label 204	TEM_L3_2_EM_slices1to325 137	46				AIYR	0	#N/A
Label 1	Label 206	TEM_L3_2_EM_slices1to325 157	257				AIZL	0	#N/A
Label 2	Label 69	TEM_L3_2_EM_slices1to325 229	56				AIZR	0	#N/A
Label 2	Label 69	TEM_L3_2_EM_slices1to325 230	53				ALA	0	#N/A
Label 2	Label 69	TEM_L3_2_EM_slices1to325 231	52				ALML	0	#N/A
Label 2	Label 69	TEM_L3_2_EM_slices1to325 232	54				ALMR	0	#N/A
Label 2	Label 69	TEM_L3_2_EM_slices1to325 233	48				ALNL	0	#N/A
Label 2	Label 69	TEM_L3_2_EM_slices1to325 234	50				ALNR	0	#N/A
Label 2	Label 69	TEM_L3_2_EM_slices1to325 248	47				AQR	0	#N/A
Label 2	Label 69	TEM_L3_2_EM_slices1to325 249	39				ASEL	0	#N/A
Label 2	Label 107	TEM_L3_2_EM_slices1to325 252	56				ASER	0	#N/A
Label 2	Label 107	TEM_L3_2_EM_slices1to325 253	76				ASGL	0	#N/A
Label 2	Label 126	TEM_L3_2_EM_slices1to325 232	6				ASGR	0	#N/A
Label 10	Label 1	TEM_L3_2_EM_slices1to325 122	77				ASHL	0	#N/A
Label 10	Label 1	TEM_L3_2_EM_slices1to325 123	118				ASHR	0	#N/A
Label 10	Label 1	TEM_L3_2_EM_slices1to325 124	103				ASIL	0	#N/A
Label 10	Label 1	TEM_L3_2_EM_slices1to325 125	86				ASIR	0	#N/A
Label 10	Label 1	TEM_L3_2_EM_slices1to325 126	129				ASJL	0	#N/A
Label 10	Label 1	TEM_L3_2_EM_slices1to325 127	99				ASJR	0	#N/A
Label 10	Label 1	TEM_L3_2_EM_slices1to325 128	96				ASKL	0	#N/A
Label 10	Label 1	TEM_L3_2_EM_slices1to325 129	76				ASKR	0	#N/A
Label 10	Label 75	TEM_L3_2_EM_slices1to325 156	58				AUAL	0	#N/A
Label 10	Label 97	TEM_L3_2_EM_slices1to325 122	54				AUAR	0	#N/A
Label 10	Label 97	TEM_L3_2_EM_slices1to325 123	66				AVAL	0	#N/A
Label 10	Label 97	TEM_L3_2_EM_slices1to325 124	83				AVAR	0	#N/A
Label 10	Label 97	TEM_L3_2_EM_slices1to325 125	72				AVBL	0	#N/A
Label 10	Label 97	TEM_L3_2_EM_slices1to325 126	68				AVBR	0	#N/A
Label 10	Label 97	TEM_L3_2_EM_slices1to325 127	74				AVDL	0	#N/A
Label 10	Label 97	TEM_L3_2_EM_slices1to325 128	105				AVDR	0	#N/A
Label 10	Label 97	TEM_L3_2_EM_slices1to325 129	96				AVEL	0	#N/A
Label 10	Label 97	TEM_L3_2_EM_slices1to325 130	78				AVER	0	#N/A
Label 10	Label 97	TEM_L3_2_EM_slices1to325 131	56				AVFL	0	#N/A
Label 10	Label 97	TEM_L3_2_EM_slices1to325 192	15				AVFR	0	#N/A
Label 10	Label 97	TEM_L3_2_EM_slices1to325 193	47				AVHL	0	#N/A
Label 10	Label 97	TEM_L3_2_EM_slices1to325 194	44				AVHR	0	#N/A
Label 10	Label 97	TEM_L3_2_EM_slices1to325 195	51				AVJL	0	#N/A
Label 10	Label 97	TEM_L3_2_EM_slices1to325 196	64				AVJR	0	#N/A
Label 10	Label 97	TEM_L3_2_EM_slices1to325 197	39				AVKL	0	#N/A
Label 10	Label 97	TEM_L3_2_EM_slices1to325 198	47				AVKR	0	#N/A
Label 10	Label 97	TEM_L3_2_EM_slices1to325 199	49				AVL	0	#N/A
Label 10	Label 97	TEM_L3_2_EM_slices1to325 200	6				AVM	0	#N/A
Label 10	Label 97	TEM_L3_2_EM_slices1to325 201	27				AWAL	0	#N/A
Label 10	Label 102	TEM_L3_2_EM_slices1to325 117	28				AWAR	0	#N/A
Label 10	Label 102	TEM_L3_2_EM_slices1to325 118	50				AWBL	0	#N/A
Label 10	Label 102	TEM_L3_2_EM_slices1to325 119	40				AWBR	0	#N/A
Label 10	Label 102	TEM_L3_2_EM_slices1to325 120	46				AWCL	0	#N/A
Label 10	Label 102	TEM_L3_2_EM_slices1to325 122	32				AWCR	0	#N/A
Label 10	Label 102	TEM_L3_2_EM_slices1to325 123	16				BAGL	0	#N/A
Label 10	Label 102	TEM_L3_2_EM_slices1to325 124	2				BAGR	0	#N/A
Label 10	Label 102	TEM_L3_2_EM_slices1to325 129	42				BDUL	0	#N/A
Label 10	Label 102	TEM_L3_2_EM_slices1to325 152	114				BDUR	0	#N/A
Label 10	Label 102	TEM_L3_2_EM_slices1to325 153	122				CEPDL	0	#N/A
Label 10	Label 102	TEM_L3_2_EM_slices1to325 154	117				CEPDR	0	#N/A
Label 10	Label 102	TEM_L3_2_EM_slices1to325 155	189				CEPVL	0	#N/A
Label 10	Label 102	TEM_L3_2_EM_slices1to325 155	52				CEPVR	0	#N/A
Label 10	Label 102	TEM_L3_2_EM_slices1to325 156	148				DVA	0	#N/A
Label 10	Label 102	TEM_L3_2_EM_slices1to325 156	143				DVC	0	#N/A
Label 10	Label 102	TEM_L3_2_EM_slices1to325 157	75				FLPL	0	#N/A
Label 10	Label 107	TEM_L3_2_EM_slices1to325 150	7				FLPR	0	#N/A
Label 10	Label 107	TEM_L3_2_EM_slices1to325 251	53				IL1DL	0	#N/A
Label 10	Label 107	TEM_L3_2_EM_slices1to325 252	153				IL1DR	0	#N/A
Label 10	Label 107	TEM_L3_2_EM_slices1to325 253	146				IL1L	0	#N/A
Label 10	Label 108	TEM_L3_2_EM_slices1to325 140	44				IL1R	0	#N/A
Label 10	Label 108	TEM_L3_2_EM_slices1to325 141	10				IL1VL	0	#N/A
Label 10	Label 108	TEM_L3_2_EM_slices1to325 146	10				IL1VR	0	#N/A
Label 10	Label 108	TEM_L3_2_EM_slices1to325 147	35				IL2DL	0	#N/A
Label 10	Label 108	TEM_L3_2_EM_slices1to325 148	40				IL2DR	0	#N/A
Label 10	Label 108	TEM_L3_2_EM_slices1to325 149	61				IL2L	0	#N/A
Label 10	Label 108	TEM_L3_2_EM_slices1to325 150	22				IL2R	0	#N/A
Label 10	Label 108	TEM_L3_2_EM_slices1to325 151	35				IL2VL	0	#N/A
Label 10	Label 108	TEM_L3_2_EM_slices1to325 152	48				IL2VR	0	#N/A
Label 10	Label 108	TEM_L3_2_EM_slices1to325 153	340				OLLL	0	#N/A
Label 10	Label 108	TEM_L3_2_EM_slices1to325 154	325				OLLR	0	#N/A
Label 10	Label 108	TEM_L3_2_EM_slices1to325 155	239				OLQDL	0	#N/A
Label 10	Label 108	TEM_L3_2_EM_slices1to325 156	107				OLQDR	0	#N/A
Label 10	Label 108	TEM_L3_2_EM_slices1to325 156	4				OLQVL	0	#N/A
Label 10	Label 108	TEM_L3_2_EM_slices1to325 157	46				OLQVR	0	#N/A
Label 10	Label 108	TEM_L3_2_EM_slices1to325 158	139				PVCL	0	#N/A
Label 10	Label 108	TEM_L3_2_EM_slices1to325 158	85				PVCR	0	#N/A
Label 10	Label 121	TEM_L3_2_EM_slices1to325 116	3				PVDL	0	#N/A
Label 10	Label 121	TEM_L3_2_EM_slices1to325 117	116				PVPL	0	#N/A
Label 10	Label 121	TEM_L3_2_EM_slices1to325 118	122				PVPR	0	#N/A
Label 10	Label 121	TEM_L3_2_EM_slices1to325 119	202				PVQL	0	#N/A
Label 10	Label 121	TEM_L3_2_EM_slices1to325 120	248				PVQR	0	#N/A
Label 10	Label 121	TEM_L3_2_EM_slices1to325 123	25				PVR	0	#N/A
Label 10	Label 121	TEM_L3_2_EM_slices1to325 124	58				PVT	0	#N/A
Label 10	Label 121	TEM_L3_2_EM_slices1to325 125	47				RIAL	0	#N/A
Label 10	Label 121	TEM_L3_2_EM_slices1to325 128	65				RIAR	0	#N/A
Label 10	Label 121	TEM_L3_2_EM_slices1to325 129	100				RIBL	0	#N/A
Label 10	Label 121	TEM_L3_2_EM_slices1to325 148	33				RIBR	0	#N/A
Label 10	Label 121	TEM_L3_2_EM_slices1to325 149	42				RICL	0	#N/A
Label 10	Label 121	TEM_L3_2_EM_slices1to325 151	20				RICR	0	#N/A
Label 10	Label 121	TEM_L3_2_EM_slices1to325 152	72				RID	0	#N/A
Label 10	Label 121	TEM_L3_2_EM_slices1to325 170	143				RIFL	0	#N/A
Label 10	Label 121	TEM_L3_2_EM_slices1to325 171	166				RIFR	0	#N/A
Label 10	Label 121	TEM_L3_2_EM_slices1to325 172	197				RIGL	0	#N/A
Label 10	Label 121	TEM_L3_2_EM_slices1to325 173	206				RIGR	0	#N/A
Label 10	Label 121	TEM_L3_2_EM_slices1to325 174	220				RIH	0	#N/A
Label 10	Label 121	TEM_L3_2_EM_slices1to325 178	212				RIML	0	#N/A
Label 10	Label 121	TEM_L3_2_EM_slices1to325 179	191				RIMR	0	#N/A
Label 10	Label 121	TEM_L3_2_EM_slices1to325 180	165				RIPL	0	#N/A
Label 10	Label 121	TEM_L3_2_EM_slices1to325 181	133				RIPR	0	#N/A
Label 10	Label 121	TEM_L3_2_EM_slices1to325 182	105				RIR	0	#N/A
Label 10	Label 121	TEM_L3_2_EM_slices1to325 183	113				RIS	0	#N/A
Label 10	Label 121	TEM_L3_2_EM_slices1to325 184	99				RIVL	0	#N/A
Label 10	Label 121	TEM_L3_2_EM_slices1to325 185	60				RIVR	0	#N/A
Label 10	Label 121	TEM_L3_2_EM_slices1to325 187	63				RMDDL	0	#N/A
Label 10	Label 121	TEM_L3_2_EM_slices1to325 188	63				RMDDR	0	#N/A
Label 10	Label 121	TEM_L3_2_EM_slices1to325 188	54				RMDL	0	#N/A
Label 10	Label 121	TEM_L3_2_EM_slices1to325 189	80				RMDR	0	#N/A
Label 10	Label 121	TEM_L3_2_EM_slices1to325 189	67				RMDVL	0	#N/A
Label 10	Label 121	TEM_L3_2_EM_slices1to325 190	120				RMDVR	0	#N/A
Label 10	Label 121	TEM_L3_2_EM_slices1to325 190	68				RMED	0	#N/A
Label 10	Label 121	TEM_L3_2_EM_slices1to325 191	324				RMEL	0	#N/A
Label 10	Label 121	TEM_L3_2_EM_slices1to325 192	267				RMER	0	#N/A
Label 10	Label 121	TEM_L3_2_EM_slices1to325 193	270				RMEV	0	#N/A
Label 10	Label 121	TEM_L3_2_EM_slices1to325 194	229				RMFL	0	#N/A
Label 10	Label 121	TEM_L3_2_EM_slices1to325 195	213				RMFR	0	#N/A
Label 10	Label 121	TEM_L3_2_EM_slices1to325 196	219				RMGL	0	#N/A
Label 10	Label 121	TEM_L3_2_EM_slices1to325 197	191				RMGR	0	#N/A
Label 10	Label 121	TEM_L3_2_EM_slices1to325 198	198				RMHL	0	#N/A
Label 10	Label 121	TEM_L3_2_EM_slices1to325 199	176				RMHR	0	#N/A
Label 10	Label 121	TEM_L3_2_EM_slices1to325 200	55				SAADL	0	#N/A
Label 10	Label 121	TEM_L3_2_EM_slices1to325 200	36				SAADR	0	#N/A
Label 10	Label 121	TEM_L3_2_EM_slices1to325 201	34				SAAVL	0	#N/A
Label 10	Label 121	TEM_L3_2_EM_slices1to325 202	10				SAAVR	0	#N/A
Label 10	Label 121	TEM_L3_2_EM_slices1to325 206	34				SABD	0	#N/A
Label 10	Label 121	TEM_L3_2_EM_slices1to325 207	22				SDQL	0	#N/A
Label 10	Label 121	TEM_L3_2_EM_slices1to325 208	14				SDQR	0	#N/A
Label 10	Label 121	TEM_L3_2_EM_slices1to325 209	16				SIADL	0	#N/A
Label 10	Label 121	TEM_L3_2_EM_slices1to325 231	32				SIADR	0	#N/A
Label 10	Label 121	TEM_L3_2_EM_slices1to325 232	74				SIAVL	0	#N/A
Label 10	Label 121	TEM_L3_2_EM_slices1to325 233	84				SIAVR	0	#N/A
Label 10	Label 121	TEM_L3_2_EM_slices1to325 234	73				SIBDL	0	#N/A
Label 10	Label 121	TEM_L3_2_EM_slices1to325 235	71				SIBDR	0	#N/A
Label 10	Label 121	TEM_L3_2_EM_slices1to325 236	61				SIBVL	0	#N/A
Label 10	Label 121	TEM_L3_2_EM_slices1to325 237	60				SIBVR	0	#N/A
Label 10	Label 121	TEM_L3_2_EM_slices1to325 238	54				SMBDL	0	#N/A
Label 10	Label 121	TEM_L3_2_EM_slices1to325 239	50				SMBDR	0	#N/A
Label 10	Label 121	TEM_L3_2_EM_slices1to325 240	49				SMBVL	0	#N/A
Label 10	Label 121	TEM_L3_2_EM_slices1to325 241	56				SMBVR	0	#N/A
Label 10	Label 121	TEM_L3_2_EM_slices1to325 242	61				SMDDL	0	#N/A
Label 10	Label 121	TEM_L3_2_EM_slices1to325 243	53				SMDDR	0	#N/A
Label 10	Label 121	TEM_L3_2_EM_slices1to325 244	50				SMDVL	0	#N/A
Label 10	Label 122	TEM_L3_2_EM_slices1to325 126	59				SMDVR	0	#N/A
Label 10	Label 122	TEM_L3_2_EM_slices1to325 127	96				URADL	0	#N/A
Label 10	Label 122	TEM_L3_2_EM_slices1to325 128	174				URADR	0	#N/A
Label 10	Label 122	TEM_L3_2_EM_slices1to325 129	88				URAVL	0	#N/A
Label 10	Label 122	TEM_L3_2_EM_slices1to325 129	63				URAVR	0	#N/A
Label 10	Label 122	TEM_L3_2_EM_slices1to325 139	38				URBL	0	#N/A
Label 10	Label 122	TEM_L3_2_EM_slices1to325 140	46				URBR	0	#N/A
Label 10	Label 122	TEM_L3_2_EM_slices1to325 141	36				URXL	0	#N/A
Label 10	Label 122	TEM_L3_2_EM_slices1to325 142	32				URXR	0	#N/A
Label 10	Label 122	TEM_L3_2_EM_slices1to325 146	10				URYDL	0	#N/A
Label 10	Label 122	TEM_L3_2_EM_slices1to325 148	35				URYDR	0	#N/A
Label 10	Label 122	TEM_L3_2_EM_slices1to325 149	28				URYVL	0	#N/A
Label 10	Label 122	TEM_L3_2_EM_slices1to325 152	222				URYVR	0	#N/A
Label 10	Label 122	TEM_L3_2_EM_slices1to325 152	14
Label 10	Label 122	TEM_L3_2_EM_slices1to325 153	347
Label 10	Label 122	TEM_L3_2_EM_slices1to325 154	444
Label 10	Label 122	TEM_L3_2_EM_slices1to325 155	554
Label 10	Label 122	TEM_L3_2_EM_slices1to325 156	185
Label 10	Label 122	TEM_L3_2_EM_slices1to325 156	164
Label 10	Label 122	TEM_L3_2_EM_slices1to325 156	43
Label 10	Label 122	TEM_L3_2_EM_slices1to325 157	210
Label 10	Label 122	TEM_L3_2_EM_slices1to325 157	153
Label 10	Label 122	TEM_L3_2_EM_slices1to325 157	62
Label 10	Label 122	TEM_L3_2_EM_slices1to325 158	110
Label 10	Label 122	TEM_L3_2_EM_slices1to325 158	44
Label 10	Label 122	TEM_L3_2_EM_slices1to325 158	41
Label 10	Label 122	TEM_L3_2_EM_slices1to325 158	40
Label 10	Label 122	TEM_L3_2_EM_slices1to325 159	145
Label 10	Label 122	TEM_L3_2_EM_slices1to325 159	140
Label 10	Label 122	TEM_L3_2_EM_slices1to325 159	114
Label 10	Label 122	TEM_L3_2_EM_slices1to325 160	131
Label 10	Label 122	TEM_L3_2_EM_slices1to325 160	117
Label 10	Label 122	TEM_L3_2_EM_slices1to325 160	86
Label 10	Label 122	TEM_L3_2_EM_slices1to325 161	123
Label 10	Label 122	TEM_L3_2_EM_slices1to325 161	116
Label 10	Label 122	TEM_L3_2_EM_slices1to325 161	72
Label 10	Label 122	TEM_L3_2_EM_slices1to325 161	18
Label 10	Label 122	TEM_L3_2_EM_slices1to325 162	93
Label 10	Label 122	TEM_L3_2_EM_slices1to325 162	54
Label 10	Label 122	TEM_L3_2_EM_slices1to325 162	21
Label 10	Label 122	TEM_L3_2_EM_slices1to325 163	132
Label 10	Label 122	TEM_L3_2_EM_slices1to325 163	72
Label 10	Label 122	TEM_L3_2_EM_slices1to325 163	19
Label 10	Label 122	TEM_L3_2_EM_slices1to325 164	288
Label 10	Label 122	TEM_L3_2_EM_slices1to325 164	110
Label 10	Label 122	TEM_L3_2_EM_slices1to325 165	203
Label 10	Label 122	TEM_L3_2_EM_slices1to325 165	173
Label 10	Label 122	TEM_L3_2_EM_slices1to325 166	227
Label 10	Label 122	TEM_L3_2_EM_slices1to325 166	75
Label 10	Label 122	TEM_L3_2_EM_slices1to325 167	246
Label 10	Label 122	TEM_L3_2_EM_slices1to325 167	40
Label 10	Label 122	TEM_L3_2_EM_slices1to325 168	336
Label 10	Label 122	TEM_L3_2_EM_slices1to325 168	102
Label 10	Label 122	TEM_L3_2_EM_slices1to325 169	329
Label 10	Label 122	TEM_L3_2_EM_slices1to325 169	175
Label 10	Label 122	TEM_L3_2_EM_slices1to325 170	548
Label 10	Label 122	TEM_L3_2_EM_slices1to325 171	457
Label 10	Label 122	TEM_L3_2_EM_slices1to325 172	429
Label 10	Label 122	TEM_L3_2_EM_slices1to325 173	258
Label 10	Label 122	TEM_L3_2_EM_slices1to325 174	260
Label 10	Label 122	TEM_L3_2_EM_slices1to325 175	226
Label 10	Label 122	TEM_L3_2_EM_slices1to325 176	187
Label 10	Label 122	TEM_L3_2_EM_slices1to325 177	208
Label 10	Label 122	TEM_L3_2_EM_slices1to325 178	185
Label 10	Label 122	TEM_L3_2_EM_slices1to325 179	179
Label 10	Label 122	TEM_L3_2_EM_slices1to325 180	135
Label 10	Label 122	TEM_L3_2_EM_slices1to325 181	97
Label 10	Label 122	TEM_L3_2_EM_slices1to325 182	96
Label 10	Label 122	TEM_L3_2_EM_slices1to325 183	70
Label 10	Label 122	TEM_L3_2_EM_slices1to325 184	62
Label 10	Label 122	TEM_L3_2_EM_slices1to325 185	42
Label 10	Label 122	TEM_L3_2_EM_slices1to325 187	48
Label 10	Label 122	TEM_L3_2_EM_slices1to325 188	38
Label 10	Label 122	TEM_L3_2_EM_slices1to325 188	30
Label 10	Label 122	TEM_L3_2_EM_slices1to325 189	78
Label 10	Label 122	TEM_L3_2_EM_slices1to325 189	71
Label 10	Label 122	TEM_L3_2_EM_slices1to325 190	115
Label 10	Label 122	TEM_L3_2_EM_slices1to325 190	76
Label 10	Label 122	TEM_L3_2_EM_slices1to325 191	357
Label 10	Label 122	TEM_L3_2_EM_slices1to325 192	346
Label 10	Label 122	TEM_L3_2_EM_slices1to325 193	337
Label 10	Label 122	TEM_L3_2_EM_slices1to325 194	317
Label 10	Label 122	TEM_L3_2_EM_slices1to325 195	327
Label 10	Label 122	TEM_L3_2_EM_slices1to325 196	291
Label 10	Label 122	TEM_L3_2_EM_slices1to325 197	295
Label 10	Label 122	TEM_L3_2_EM_slices1to325 198	286
Label 10	Label 122	TEM_L3_2_EM_slices1to325 199	304
Label 10	Label 122	TEM_L3_2_EM_slices1to325 200	134
Label 10	Label 122	TEM_L3_2_EM_slices1to325 200	89
Label 10	Label 122	TEM_L3_2_EM_slices1to325 201	119
Label 10	Label 122	TEM_L3_2_EM_slices1to325 201	49
Label 10	Label 122	TEM_L3_2_EM_slices1to325 202	124
Label 10	Label 122	TEM_L3_2_EM_slices1to325 203	101
Label 10	Label 122	TEM_L3_2_EM_slices1to325 204	105
Label 10	Label 122	TEM_L3_2_EM_slices1to325 206	64
Label 10	Label 122	TEM_L3_2_EM_slices1to325 207	62
Label 10	Label 122	TEM_L3_2_EM_slices1to325 208	41
Label 10	Label 122	TEM_L3_2_EM_slices1to325 209	47
Label 10	Label 122	TEM_L3_2_EM_slices1to325 210	28
Label 10	Label 122	TEM_L3_2_EM_slices1to325 211	36
Label 10	Label 122	TEM_L3_2_EM_slices1to325 212	62
Label 10	Label 122	TEM_L3_2_EM_slices1to325 213	76
Label 10	Label 122	TEM_L3_2_EM_slices1to325 214	94
Label 10	Label 122	TEM_L3_2_EM_slices1to325 215	91
Label 10	Label 122	TEM_L3_2_EM_slices1to325 216	91
Label 10	Label 122	TEM_L3_2_EM_slices1to325 217	84
Label 10	Label 122	TEM_L3_2_EM_slices1to325 218	97
Label 10	Label 122	TEM_L3_2_EM_slices1to325 219	110
Label 10	Label 122	TEM_L3_2_EM_slices1to325 220	94
Label 10	Label 122	TEM_L3_2_EM_slices1to325 221	93
Label 10	Label 122	TEM_L3_2_EM_slices1to325 222	107
Label 10	Label 122	TEM_L3_2_EM_slices1to325 223	80
Label 10	Label 122	TEM_L3_2_EM_slices1to325 224	90
Label 10	Label 122	TEM_L3_2_EM_slices1to325 225	81
Label 10	Label 122	TEM_L3_2_EM_slices1to325 226	71
Label 10	Label 122	TEM_L3_2_EM_slices1to325 227	70
Label 10	Label 122	TEM_L3_2_EM_slices1to325 228	61
Label 10	Label 122	TEM_L3_2_EM_slices1to325 229	63
Label 10	Label 122	TEM_L3_2_EM_slices1to325 230	51
Label 10	Label 122	TEM_L3_2_EM_slices1to325 231	50
Label 10	Label 122	TEM_L3_2_EM_slices1to325 232	52
Label 10	Label 122	TEM_L3_2_EM_slices1to325 233	51
Label 10	Label 122	TEM_L3_2_EM_slices1to325 234	46
Label 10	Label 122	TEM_L3_2_EM_slices1to325 235	42
Label 10	Label 122	TEM_L3_2_EM_slices1to325 236	46
Label 10	Label 122	TEM_L3_2_EM_slices1to325 237	45
Label 10	Label 122	TEM_L3_2_EM_slices1to325 238	19
Label 10	Label 122	TEM_L3_2_EM_slices1to325 239	19
Label 10	Label 122	TEM_L3_2_EM_slices1to325 240	28
Label 10	Label 122	TEM_L3_2_EM_slices1to325 241	17
Label 10	Label 122	TEM_L3_2_EM_slices1to325 242	26
Label 10	Label 122	TEM_L3_2_EM_slices1to325 250	20
Label 10	Label 122	TEM_L3_2_EM_slices1to325 251	35
Label 10	Label 123	TEM_L3_2_EM_slices1to325 214	35
Label 10	Label 123	TEM_L3_2_EM_slices1to325 215	42
Label 10	Label 123	TEM_L3_2_EM_slices1to325 216	62
Label 10	Label 123	TEM_L3_2_EM_slices1to325 217	83
Label 10	Label 123	TEM_L3_2_EM_slices1to325 218	74
Label 10	Label 123	TEM_L3_2_EM_slices1to325 219	71
Label 10	Label 123	TEM_L3_2_EM_slices1to325 220	74
Label 10	Label 123	TEM_L3_2_EM_slices1to325 221	77
Label 10	Label 123	TEM_L3_2_EM_slices1to325 222	58
Label 10	Label 123	TEM_L3_2_EM_slices1to325 223	52
Label 10	Label 123	TEM_L3_2_EM_slices1to325 224	62
Label 10	Label 123	TEM_L3_2_EM_slices1to325 225	80
Label 10	Label 123	TEM_L3_2_EM_slices1to325 226	79
Label 10	Label 123	TEM_L3_2_EM_slices1to325 227	72
Label 10	Label 123	TEM_L3_2_EM_slices1to325 228	70
Label 10	Label 123	TEM_L3_2_EM_slices1to325 229	57
Label 10	Label 123	TEM_L3_2_EM_slices1to325 230	46
Label 10	Label 123	TEM_L3_2_EM_slices1to325 231	45
Label 10	Label 123	TEM_L3_2_EM_slices1to325 232	48
Label 10	Label 123	TEM_L3_2_EM_slices1to325 233	45
Label 10	Label 123	TEM_L3_2_EM_slices1to325 234	46
Label 10	Label 123	TEM_L3_2_EM_slices1to325 235	44
Label 10	Label 123	TEM_L3_2_EM_slices1to325 236	37
Label 10	Label 123	TEM_L3_2_EM_slices1to325 237	27
Label 10	Label 123	TEM_L3_2_EM_slices1to325 238	31
Label 10	Label 123	TEM_L3_2_EM_slices1to325 239	11
Label 10	Label 123	TEM_L3_2_EM_slices1to325 240	39
Label 10	Label 123	TEM_L3_2_EM_slices1to325 241	28
Label 10	Label 123	TEM_L3_2_EM_slices1to325 242	22
Label 10	Label 126	TEM_L3_2_EM_slices1to325 219	8
Label 10	Label 126	TEM_L3_2_EM_slices1to325 220	23
Label 10	Label 126	TEM_L3_2_EM_slices1to325 221	24
Label 10	Label 126	TEM_L3_2_EM_slices1to325 222	17
Label 10	Label 126	TEM_L3_2_EM_slices1to325 225	15
Label 10	Label 128	TEM_L3_2_EM_slices1to325 125	93
Label 10	Label 128	TEM_L3_2_EM_slices1to325 126	49
Label 10	Label 128	TEM_L3_2_EM_slices1to325 127	67
Label 10	Label 128	TEM_L3_2_EM_slices1to325 128	81
Label 10	Label 128	TEM_L3_2_EM_slices1to325 129	51
Label 10	Label 128	TEM_L3_2_EM_slices1to325 188	39
Label 10	Label 128	TEM_L3_2_EM_slices1to325 189	39
Label 10	Label 128	TEM_L3_2_EM_slices1to325 190	34
Label 10	Label 128	TEM_L3_2_EM_slices1to325 191	56
Label 10	Label 128	TEM_L3_2_EM_slices1to325 192	48
Label 10	Label 128	TEM_L3_2_EM_slices1to325 193	41
Label 10	Label 128	TEM_L3_2_EM_slices1to325 194	90
Label 10	Label 128	TEM_L3_2_EM_slices1to325 195	52
Label 10	Label 128	TEM_L3_2_EM_slices1to325 196	34
Label 10	Label 128	TEM_L3_2_EM_slices1to325 197	36
Label 10	Label 128	TEM_L3_2_EM_slices1to325 198	63
Label 10	Label 128	TEM_L3_2_EM_slices1to325 199	70
Label 10	Label 128	TEM_L3_2_EM_slices1to325 200	88
Label 10	Label 128	TEM_L3_2_EM_slices1to325 201	98
Label 10	Label 128	TEM_L3_2_EM_slices1to325 202	111
Label 10	Label 128	TEM_L3_2_EM_slices1to325 203	140
Label 10	Label 128	TEM_L3_2_EM_slices1to325 204	138
Label 10	Label 128	TEM_L3_2_EM_slices1to325 206	103
Label 10	Label 128	TEM_L3_2_EM_slices1to325 207	100
Label 10	Label 128	TEM_L3_2_EM_slices1to325 208	63
Label 10	Label 128	TEM_L3_2_EM_slices1to325 209	67
Label 10	Label 128	TEM_L3_2_EM_slices1to325 210	72
Label 10	Label 128	TEM_L3_2_EM_slices1to325 211	45
Label 10	Label 128	TEM_L3_2_EM_slices1to325 212	54
Label 10	Label 128	TEM_L3_2_EM_slices1to325 213	65
Label 10	Label 128	TEM_L3_2_EM_slices1to325 214	53
Label 10	Label 128	TEM_L3_2_EM_slices1to325 215	38
Label 10	Label 128	TEM_L3_2_EM_slices1to325 216	31
Label 10	Label 128	TEM_L3_2_EM_slices1to325 218	43
Label 10	Label 128	TEM_L3_2_EM_slices1to325 219	32
Label 10	Label 128	TEM_L3_2_EM_slices1to325 220	39
Label 10	Label 128	TEM_L3_2_EM_slices1to325 228	41
Label 10	Label 128	TEM_L3_2_EM_slices1to325 229	24
Label 10	Label 128	TEM_L3_2_EM_slices1to325 230	16
Label 10	Label 130	TEM_L3_2_EM_slices1to325 162	15
Label 10	Label 130	TEM_L3_2_EM_slices1to325 163	148
Label 10	Label 130	TEM_L3_2_EM_slices1to325 164	178
Label 10	Label 130	TEM_L3_2_EM_slices1to325 165	158
Label 10	Label 130	TEM_L3_2_EM_slices1to325 166	121
Label 10	Label 130	TEM_L3_2_EM_slices1to325 167	75
Label 10	Label 130	TEM_L3_2_EM_slices1to325 167	22
Label 10	Label 130	TEM_L3_2_EM_slices1to325 168	80
Label 10	Label 130	TEM_L3_2_EM_slices1to325 169	106
Label 10	Label 130	TEM_L3_2_EM_slices1to325 170	112
Label 10	Label 130	TEM_L3_2_EM_slices1to325 170	27
Label 10	Label 130	TEM_L3_2_EM_slices1to325 171	149
Label 10	Label 130	TEM_L3_2_EM_slices1to325 171	58
Label 10	Label 130	TEM_L3_2_EM_slices1to325 172	390
Label 10	Label 130	TEM_L3_2_EM_slices1to325 173	238
Label 10	Label 130	TEM_L3_2_EM_slices1to325 174	206
Label 10	Label 130	TEM_L3_2_EM_slices1to325 175	175
Label 10	Label 130	TEM_L3_2_EM_slices1to325 176	118
Label 10	Label 130	TEM_L3_2_EM_slices1to325 177	63
Label 10	Label 130	TEM_L3_2_EM_slices1to325 197	62
Label 10	Label 130	TEM_L3_2_EM_slices1to325 198	70
Label 10	Label 130	TEM_L3_2_EM_slices1to325 199	80
Label 10	Label 130	TEM_L3_2_EM_slices1to325 200	85
Label 10	Label 130	TEM_L3_2_EM_slices1to325 201	83
Label 10	Label 130	TEM_L3_2_EM_slices1to325 202	59
Label 10	Label 130	TEM_L3_2_EM_slices1to325 203	80
Label 10	Label 130	TEM_L3_2_EM_slices1to325 204	52
Label 10	Label 147	TEM_L3_2_EM_slices1to325 119	48
Label 10	Label 147	TEM_L3_2_EM_slices1to325 120	63
Label 10	Label 152	TEM_L3_2_EM_slices1to325 117	50
Label 10	Label 152	TEM_L3_2_EM_slices1to325 118	78
Label 10	Label 152	TEM_L3_2_EM_slices1to325 119	123
Label 10	Label 152	TEM_L3_2_EM_slices1to325 120	121
Label 10	Label 152	TEM_L3_2_EM_slices1to325 122	100
Label 10	Label 152	TEM_L3_2_EM_slices1to325 123	106
Label 10	Label 177	TEM_L3_2_EM_slices1to325 127	4
Label 10	Label 177	TEM_L3_2_EM_slices1to325 128	94
Label 10	Label 177	TEM_L3_2_EM_slices1to325 129	123
Label 10	Label 177	TEM_L3_2_EM_slices1to325 132	196
Label 10	Label 177	TEM_L3_2_EM_slices1to325 133	75
Label 10	Label 177	TEM_L3_2_EM_slices1to325 133	40
Label 10	Label 177	TEM_L3_2_EM_slices1to325 134	40
Label 10	Label 177	TEM_L3_2_EM_slices1to325 137	124
Label 10	Label 177	TEM_L3_2_EM_slices1to325 139	221
Label 10	Label 177	TEM_L3_2_EM_slices1to325 140	151
Label 10	Label 177	TEM_L3_2_EM_slices1to325 141	128
Label 10	Label 177	TEM_L3_2_EM_slices1to325 142	25
Label 10	Label 177	TEM_L3_2_EM_slices1to325 146	35
Label 10	Label 177	TEM_L3_2_EM_slices1to325 147	64
Label 10	Label 177	TEM_L3_2_EM_slices1to325 148	94
Label 10	Label 177	TEM_L3_2_EM_slices1to325 149	108
Label 10	Label 177	TEM_L3_2_EM_slices1to325 150	85
Label 10	Label 177	TEM_L3_2_EM_slices1to325 151	97
Label 10	Label 177	TEM_L3_2_EM_slices1to325 152	49
Label 10	Label 177	TEM_L3_2_EM_slices1to325 152	40
Label 10	Label 177	TEM_L3_2_EM_slices1to325 153	107
Label 10	Label 177	TEM_L3_2_EM_slices1to325 154	96
Label 10	Label 177	TEM_L3_2_EM_slices1to325 155	158
Label 10	Label 177	TEM_L3_2_EM_slices1to325 155	71
Label 10	Label 177	TEM_L3_2_EM_slices1to325 156	313
Label 10	Label 177	TEM_L3_2_EM_slices1to325 156	124
Label 10	Label 177	TEM_L3_2_EM_slices1to325 156	25
Label 10	Label 177	TEM_L3_2_EM_slices1to325 157	607
Label 10	Label 177	TEM_L3_2_EM_slices1to325 157	110
Label 10	Label 177	TEM_L3_2_EM_slices1to325 158	252
Label 10	Label 177	TEM_L3_2_EM_slices1to325 158	217
Label 10	Label 177	TEM_L3_2_EM_slices1to325 158	140
Label 10	Label 177	TEM_L3_2_EM_slices1to325 158	15
Label 10	Label 177	TEM_L3_2_EM_slices1to325 159	251
Label 10	Label 177	TEM_L3_2_EM_slices1to325 159	69
Label 10	Label 177	TEM_L3_2_EM_slices1to325 159	47
Label 10	Label 177	TEM_L3_2_EM_slices1to325 160	205
Label 10	Label 177	TEM_L3_2_EM_slices1to325 160	202
Label 10	Label 177	TEM_L3_2_EM_slices1to325 160	70
Label 10	Label 177	TEM_L3_2_EM_slices1to325 161	300
Label 10	Label 177	TEM_L3_2_EM_slices1to325 161	126
Label 10	Label 177	TEM_L3_2_EM_slices1to325 161	12
Label 10	Label 177	TEM_L3_2_EM_slices1to325 162	349
Label 10	Label 177	TEM_L3_2_EM_slices1to325 162	33
Label 10	Label 177	TEM_L3_2_EM_slices1to325 163	254
Label 10	Label 177	TEM_L3_2_EM_slices1to325 164	238
Label 10	Label 177	TEM_L3_2_EM_slices1to325 165	209
Label 10	Label 177	TEM_L3_2_EM_slices1to325 166	133
Label 10	Label 177	TEM_L3_2_EM_slices1to325 166	82
Label 10	Label 177	TEM_L3_2_EM_slices1to325 167	87
Label 10	Label 177	TEM_L3_2_EM_slices1to325 168	85
Label 10	Label 177	TEM_L3_2_EM_slices1to325 188	9
Label 10	Label 177	TEM_L3_2_EM_slices1to325 189	36
Label 10	Label 177	TEM_L3_2_EM_slices1to325 190	44
Label 10	Label 177	TEM_L3_2_EM_slices1to325 191	11
Label 10	Label 177	TEM_L3_2_EM_slices1to325 196	58
Label 10	Label 177	TEM_L3_2_EM_slices1to325 197	25
Label 10	Label 177	TEM_L3_2_EM_slices1to325 202	2
Label 10	Label 177	TEM_L3_2_EM_slices1to325 203	22
Label 10	Label 177	TEM_L3_2_EM_slices1to325 206	61
Label 10	Label 177	TEM_L3_2_EM_slices1to325 207	81
Label 10	Label 177	TEM_L3_2_EM_slices1to325 208	99
Label 10	Label 177	TEM_L3_2_EM_slices1to325 209	104
Label 10	Label 177	TEM_L3_2_EM_slices1to325 210	72
Label 10	Label 181	TEM_L3_2_EM_slices1to325 152	78
Label 10	Label 181	TEM_L3_2_EM_slices1to325 152	13
Label 10	Label 181	TEM_L3_2_EM_slices1to325 153	48
Label 10	Label 181	TEM_L3_2_EM_slices1to325 153	12
Label 10	Label 181	TEM_L3_2_EM_slices1to325 155	50
Label 10	Label 194	TEM_L3_2_EM_slices1to325 166	27
Label 10	Label 194	TEM_L3_2_EM_slices1to325 167	94
Label 10	Label 194	TEM_L3_2_EM_slices1to325 168	96
Label 10	Label 194	TEM_L3_2_EM_slices1to325 169	89
Label 10	Label 194	TEM_L3_2_EM_slices1to325 170	99
Label 12	Label 162	TEM_L3_2_EM_slices1to325 167	31
Label 12	Label 162	TEM_L3_2_EM_slices1to325 177	45
Label 15	Label 20	TEM_L3_2_EM_slices1to325 128	169
Label 15	Label 20	TEM_L3_2_EM_slices1to325 129	176
Label 15	Label 20	TEM_L3_2_EM_slices1to325 130	205
Label 15	Label 20	TEM_L3_2_EM_slices1to325 131	231
Label 15	Label 20	TEM_L3_2_EM_slices1to325 132	242
Label 15	Label 20	TEM_L3_2_EM_slices1to325 133	230
Label 15	Label 20	TEM_L3_2_EM_slices1to325 134	220
Label 15	Label 20	TEM_L3_2_EM_slices1to325 135	171
Label 15	Label 20	TEM_L3_2_EM_slices1to325 136	115
Label 15	Label 20	TEM_L3_2_EM_slices1to325 137	46
Label 15	Label 28	TEM_L3_2_EM_slices1to325 136	4
Label 15	Label 28	TEM_L3_2_EM_slices1to325 137	6
Label 15	Label 28	TEM_L3_2_EM_slices1to325 138	13
Label 15	Label 29	TEM_L3_2_EM_slices1to325 128	5
Label 15	Label 29	TEM_L3_2_EM_slices1to325 129	130
Label 15	Label 29	TEM_L3_2_EM_slices1to325 130	123
Label 15	Label 29	TEM_L3_2_EM_slices1to325 131	105
Label 15	Label 29	TEM_L3_2_EM_slices1to325 132	93
Label 15	Label 29	TEM_L3_2_EM_slices1to325 133	55
Label 15	Label 29	TEM_L3_2_EM_slices1to325 134	40
Label 15	Label 29	TEM_L3_2_EM_slices1to325 135	27
Label 15	Label 29	TEM_L3_2_EM_slices1to325 143	8
Label 15	Label 29	TEM_L3_2_EM_slices1to325 144	28
Label 15	Label 29	TEM_L3_2_EM_slices1to325 145	6
Label 15	Label 29	TEM_L3_2_EM_slices1to325 146	14
Label 15	Label 29	TEM_L3_2_EM_slices1to325 147	36
Label 15	Label 29	TEM_L3_2_EM_slices1to325 148	51
Label 15	Label 29	TEM_L3_2_EM_slices1to325 149	105
Label 15	Label 53	TEM_L3_2_EM_slices1to325 132	77
Label 15	Label 64	TEM_L3_2_EM_slices1to325 119	59
Label 15	Label 82	TEM_L3_2_EM_slices1to325 172	38
Label 15	Label 82	TEM_L3_2_EM_slices1to325 173	65
Label 15	Label 82	TEM_L3_2_EM_slices1to325 174	66
Label 15	Label 82	TEM_L3_2_EM_slices1to325 175	74
Label 15	Label 82	TEM_L3_2_EM_slices1to325 176	72
Label 15	Label 82	TEM_L3_2_EM_slices1to325 177	64
Label 15	Label 82	TEM_L3_2_EM_slices1to325 178	37
Label 15	Label 82	TEM_L3_2_EM_slices1to325 180	47
Label 15	Label 82	TEM_L3_2_EM_slices1to325 181	37
Label 15	Label 82	TEM_L3_2_EM_slices1to325 204	13
Label 15	Label 82	TEM_L3_2_EM_slices1to325 205	74
Label 15	Label 82	TEM_L3_2_EM_slices1to325 206	85
Label 15	Label 82	TEM_L3_2_EM_slices1to325 207	105
Label 15	Label 82	TEM_L3_2_EM_slices1to325 208	115
Label 15	Label 82	TEM_L3_2_EM_slices1to325 209	89
Label 15	Label 82	TEM_L3_2_EM_slices1to325 210	83
Label 15	Label 82	TEM_L3_2_EM_slices1to325 211	102
Label 15	Label 82	TEM_L3_2_EM_slices1to325 212	106
Label 15	Label 82	TEM_L3_2_EM_slices1to325 213	96
Label 15	Label 82	TEM_L3_2_EM_slices1to325 214	85
Label 15	Label 82	TEM_L3_2_EM_slices1to325 215	56
Label 15	Label 82	TEM_L3_2_EM_slices1to325 216	65
Label 15	Label 82	TEM_L3_2_EM_slices1to325 217	58
Label 15	Label 82	TEM_L3_2_EM_slices1to325 218	45
Label 15	Label 82	TEM_L3_2_EM_slices1to325 219	26
Label 15	Label 82	TEM_L3_2_EM_slices1to325 220	13
Label 15	Label 82	TEM_L3_2_EM_slices1to325 230	29
Label 15	Label 82	TEM_L3_2_EM_slices1to325 231	51
Label 15	Label 82	TEM_L3_2_EM_slices1to325 238	2
Label 15	Label 88	TEM_L3_2_EM_slices1to325 132	54
Label 15	Label 88	TEM_L3_2_EM_slices1to325 133	31
Label 15	Label 88	TEM_L3_2_EM_slices1to325 134	79
Label 15	Label 88	TEM_L3_2_EM_slices1to325 137	322
Label 15	Label 106	TEM_L3_2_EM_slices1to325 117	18
Label 15	Label 106	TEM_L3_2_EM_slices1to325 118	1
Label 15	Label 114	TEM_L3_2_EM_slices1to325 86	157
Label 15	Label 114	TEM_L3_2_EM_slices1to325 86	44
Label 15	Label 114	TEM_L3_2_EM_slices1to325 87	120
Label 15	Label 114	TEM_L3_2_EM_slices1to325 88	244
Label 15	Label 114	TEM_L3_2_EM_slices1to325 89	192
Label 15	Label 114	TEM_L3_2_EM_slices1to325 90	122
Label 15	Label 114	TEM_L3_2_EM_slices1to325 92	53
Label 15	Label 114	TEM_L3_2_EM_slices1to325 115	24
Label 15	Label 114	TEM_L3_2_EM_slices1to325 116	46
Label 15	Label 114	TEM_L3_2_EM_slices1to325 117	76
Label 15	Label 117	TEM_L3_2_EM_slices1to325 117	77
Label 15	Label 117	TEM_L3_2_EM_slices1to325 118	59
Label 15	Label 117	TEM_L3_2_EM_slices1to325 119	45
Label 15	Label 117	TEM_L3_2_EM_slices1to325 128	52
Label 15	Label 117	TEM_L3_2_EM_slices1to325 129	267
Label 15	Label 117	TEM_L3_2_EM_slices1to325 130	222
Label 15	Label 117	TEM_L3_2_EM_slices1to325 131	217
Label 15	Label 117	TEM_L3_2_EM_slices1to325 132	165
Label 15	Label 117	TEM_L3_2_EM_slices1to325 133	151
Label 15	Label 117	TEM_L3_2_EM_slices1to325 134	139
Label 15	Label 117	TEM_L3_2_EM_slices1to325 135	116
Label 15	Label 117	TEM_L3_2_EM_slices1to325 136	74
Label 15	Label 117	TEM_L3_2_EM_slices1to325 138	84
Label 15	Label 117	TEM_L3_2_EM_slices1to325 139	96
Label 15	Label 117	TEM_L3_2_EM_slices1to325 140	52
Label 15	Label 117	TEM_L3_2_EM_slices1to325 141	46
Label 15	Label 117	TEM_L3_2_EM_slices1to325 142	51
Label 15	Label 117	TEM_L3_2_EM_slices1to325 145	26
Label 15	Label 117	TEM_L3_2_EM_slices1to325 146	17
Label 15	Label 118	TEM_L3_2_EM_slices1to325 123	142
Label 15	Label 118	TEM_L3_2_EM_slices1to325 124	147
Label 15	Label 118	TEM_L3_2_EM_slices1to325 125	164
Label 15	Label 118	TEM_L3_2_EM_slices1to325 126	197
Label 15	Label 118	TEM_L3_2_EM_slices1to325 127	195
Label 15	Label 118	TEM_L3_2_EM_slices1to325 128	211
Label 15	Label 118	TEM_L3_2_EM_slices1to325 129	206
Label 15	Label 118	TEM_L3_2_EM_slices1to325 130	201
Label 15	Label 118	TEM_L3_2_EM_slices1to325 130	98
Label 15	Label 118	TEM_L3_2_EM_slices1to325 132	435
Label 15	Label 118	TEM_L3_2_EM_slices1to325 133	218
Label 15	Label 118	TEM_L3_2_EM_slices1to325 134	218
Label 15	Label 118	TEM_L3_2_EM_slices1to325 137	178
Label 15	Label 118	TEM_L3_2_EM_slices1to325 149	59
Label 15	Label 118	TEM_L3_2_EM_slices1to325 150	71
Label 15	Label 118	TEM_L3_2_EM_slices1to325 151	58
Label 15	Label 118	TEM_L3_2_EM_slices1to325 152	56
Label 15	Label 118	TEM_L3_2_EM_slices1to325 154	47
Label 15	Label 118	TEM_L3_2_EM_slices1to325 155	75
Label 15	Label 134	TEM_L3_2_EM_slices1to325 132	135
Label 15	Label 134	TEM_L3_2_EM_slices1to325 133	120
Label 15	Label 134	TEM_L3_2_EM_slices1to325 134	117
Label 15	Label 134	TEM_L3_2_EM_slices1to325 137	95
Label 15	Label 135	TEM_L3_2_EM_slices1to325 117	77
Label 15	Label 135	TEM_L3_2_EM_slices1to325 118	84
Label 15	Label 135	TEM_L3_2_EM_slices1to325 119	49
Label 15	Label 135	TEM_L3_2_EM_slices1to325 120	54
Label 15	Label 135	TEM_L3_2_EM_slices1to325 122	71
Label 15	Label 135	TEM_L3_2_EM_slices1to325 123	9
Label 15	Label 135	TEM_L3_2_EM_slices1to325 124	25
Label 15	Label 135	TEM_L3_2_EM_slices1to325 125	46
Label 15	Label 139	TEM_L3_2_EM_slices1to325 212	9
Label 15	Label 139	TEM_L3_2_EM_slices1to325 213	31
Label 15	Label 139	TEM_L3_2_EM_slices1to325 214	37
Label 15	Label 139	TEM_L3_2_EM_slices1to325 215	44
Label 15	Label 139	TEM_L3_2_EM_slices1to325 216	48
Label 15	Label 139	TEM_L3_2_EM_slices1to325 217	57
Label 15	Label 139	TEM_L3_2_EM_slices1to325 218	59
Label 15	Label 139	TEM_L3_2_EM_slices1to325 219	54
Label 15	Label 139	TEM_L3_2_EM_slices1to325 220	52
Label 15	Label 139	TEM_L3_2_EM_slices1to325 221	44
Label 15	Label 139	TEM_L3_2_EM_slices1to325 222	41
Label 15	Label 139	TEM_L3_2_EM_slices1to325 223	51
Label 15	Label 139	TEM_L3_2_EM_slices1to325 224	32
Label 15	Label 139	TEM_L3_2_EM_slices1to325 225	39
Label 15	Label 139	TEM_L3_2_EM_slices1to325 226	47
Label 15	Label 139	TEM_L3_2_EM_slices1to325 227	41
Label 15	Label 139	TEM_L3_2_EM_slices1to325 228	36
Label 15	Label 139	TEM_L3_2_EM_slices1to325 229	36
Label 15	Label 139	TEM_L3_2_EM_slices1to325 230	44
Label 15	Label 139	TEM_L3_2_EM_slices1to325 231	54
Label 15	Label 139	TEM_L3_2_EM_slices1to325 232	26
Label 15	Label 139	TEM_L3_2_EM_slices1to325 233	26
Label 15	Label 139	TEM_L3_2_EM_slices1to325 234	42
Label 15	Label 139	TEM_L3_2_EM_slices1to325 235	64
Label 15	Label 139	TEM_L3_2_EM_slices1to325 236	73
Label 15	Label 139	TEM_L3_2_EM_slices1to325 237	93
Label 15	Label 139	TEM_L3_2_EM_slices1to325 238	97
Label 15	Label 139	TEM_L3_2_EM_slices1to325 239	100
Label 15	Label 139	TEM_L3_2_EM_slices1to325 240	104
Label 15	Label 139	TEM_L3_2_EM_slices1to325 241	89
Label 15	Label 139	TEM_L3_2_EM_slices1to325 242	96
Label 15	Label 162	TEM_L3_2_EM_slices1to325 143	53
Label 15	Label 162	TEM_L3_2_EM_slices1to325 144	70
Label 15	Label 162	TEM_L3_2_EM_slices1to325 145	86
Label 15	Label 162	TEM_L3_2_EM_slices1to325 146	82
Label 15	Label 162	TEM_L3_2_EM_slices1to325 147	80
Label 15	Label 162	TEM_L3_2_EM_slices1to325 148	87
Label 15	Label 162	TEM_L3_2_EM_slices1to325 149	42
Label 15	Label 162	TEM_L3_2_EM_slices1to325 150	34
Label 15	Label 162	TEM_L3_2_EM_slices1to325 151	61
Label 15	Label 162	TEM_L3_2_EM_slices1to325 152	71
Label 15	Label 162	TEM_L3_2_EM_slices1to325 154	40
Label 15	Label 162	TEM_L3_2_EM_slices1to325 155	32
Label 15	Label 181	TEM_L3_2_EM_slices1to325 146	88
Label 15	Label 181	TEM_L3_2_EM_slices1to325 147	87
Label 15	Label 181	TEM_L3_2_EM_slices1to325 148	60
Label 15	Label 181	TEM_L3_2_EM_slices1to325 149	4
Label 15	Label 182	TEM_L3_2_EM_slices1to325 132	266
Label 15	Label 182	TEM_L3_2_EM_slices1to325 132	34
Label 15	Label 182	TEM_L3_2_EM_slices1to325 133	122
Label 15	Label 182	TEM_L3_2_EM_slices1to325 133	63
Label 15	Label 182	TEM_L3_2_EM_slices1to325 133	27
Label 15	Label 182	TEM_L3_2_EM_slices1to325 134	98
Label 15	Label 182	TEM_L3_2_EM_slices1to325 134	21
Label 15	Label 182	TEM_L3_2_EM_slices1to325 137	107
Label 15	Label 182	TEM_L3_2_EM_slices1to325 137	41
Label 15	Label 183	TEM_L3_2_EM_slices1to325 117	85
Label 15	Label 183	TEM_L3_2_EM_slices1to325 118	86
Label 15	Label 183	TEM_L3_2_EM_slices1to325 124	15
Label 15	Label 183	TEM_L3_2_EM_slices1to325 125	253
Label 15	Label 183	TEM_L3_2_EM_slices1to325 126	267
Label 15	Label 183	TEM_L3_2_EM_slices1to325 127	263
Label 15	Label 183	TEM_L3_2_EM_slices1to325 128	303
Label 15	Label 183	TEM_L3_2_EM_slices1to325 129	263
Label 15	Label 183	TEM_L3_2_EM_slices1to325 129	42
Label 15	Label 183	TEM_L3_2_EM_slices1to325 130	209
Label 15	Label 183	TEM_L3_2_EM_slices1to325 130	120
Label 15	Label 183	TEM_L3_2_EM_slices1to325 130	28
Label 15	Label 183	TEM_L3_2_EM_slices1to325 131	174
Label 15	Label 183	TEM_L3_2_EM_slices1to325 131	154
Label 15	Label 183	TEM_L3_2_EM_slices1to325 131	70
Label 15	Label 183	TEM_L3_2_EM_slices1to325 132	443
Label 15	Label 183	TEM_L3_2_EM_slices1to325 132	111
Label 15	Label 183	TEM_L3_2_EM_slices1to325 133	222
Label 15	Label 183	TEM_L3_2_EM_slices1to325 134	78
Label 15	Label 183	TEM_L3_2_EM_slices1to325 138	24
Label 15	Label 183	TEM_L3_2_EM_slices1to325 139	105
Label 15	Label 183	TEM_L3_2_EM_slices1to325 140	102
Label 15	Label 183	TEM_L3_2_EM_slices1to325 141	126
Label 15	Label 183	TEM_L3_2_EM_slices1to325 142	148
Label 15	Label 183	TEM_L3_2_EM_slices1to325 143	159
Label 15	Label 183	TEM_L3_2_EM_slices1to325 144	148
Label 15	Label 183	TEM_L3_2_EM_slices1to325 145	166
Label 15	Label 183	TEM_L3_2_EM_slices1to325 146	178
Label 15	Label 183	TEM_L3_2_EM_slices1to325 147	179
Label 15	Label 183	TEM_L3_2_EM_slices1to325 148	158
Label 15	Label 183	TEM_L3_2_EM_slices1to325 149	63
Label 15	Label 183	TEM_L3_2_EM_slices1to325 150	61
Label 15	Label 183	TEM_L3_2_EM_slices1to325 151	49
Label 15	Label 183	TEM_L3_2_EM_slices1to325 152	71
Label 15	Label 183	TEM_L3_2_EM_slices1to325 154	38
Label 15	Label 183	TEM_L3_2_EM_slices1to325 155	49
Label 15	Label 185	TEM_L3_2_EM_slices1to325 79	11
Label 15	Label 185	TEM_L3_2_EM_slices1to325 80	80
Label 15	Label 185	TEM_L3_2_EM_slices1to325 81	122
Label 15	Label 185	TEM_L3_2_EM_slices1to325 82	106
Label 15	Label 185	TEM_L3_2_EM_slices1to325 83	179
Label 15	Label 185	TEM_L3_2_EM_slices1to325 83	137
Label 15	Label 185	TEM_L3_2_EM_slices1to325 84	216
Label 15	Label 185	TEM_L3_2_EM_slices1to325 84	134
Label 15	Label 185	TEM_L3_2_EM_slices1to325 92	139
Label 15	Label 185	TEM_L3_2_EM_slices1to325 93	93
Label 15	Label 185	TEM_L3_2_EM_slices1to325 93	15
Label 15	Label 185	TEM_L3_2_EM_slices1to325 94	36
Label 15	Label 185	TEM_L3_2_EM_slices1to325 95	28
Label 15	Label 185	TEM_L3_2_EM_slices1to325 95	27
Label 15	Label 185	TEM_L3_2_EM_slices1to325 96	41
Label 15	Label 185	TEM_L3_2_EM_slices1to325 96	16
Label 15	Label 185	TEM_L3_2_EM_slices1to325 97	70
Label 15	Label 185	TEM_L3_2_EM_slices1to325 98	85
Label 15	Label 185	TEM_L3_2_EM_slices1to325 99	56
Label 15	Label 185	TEM_L3_2_EM_slices1to325 100	48
Label 15	Label 185	TEM_L3_2_EM_slices1to325 102	36
Label 15	Label 185	TEM_L3_2_EM_slices1to325 103	24
Label 15	Label 185	TEM_L3_2_EM_slices1to325 104	50
Label 15	Label 185	TEM_L3_2_EM_slices1to325 105	60
Label 15	Label 185	TEM_L3_2_EM_slices1to325 106	101
Label 15	Label 185	TEM_L3_2_EM_slices1to325 107	129
Label 15	Label 185	TEM_L3_2_EM_slices1to325 108	329
Label 15	Label 185	TEM_L3_2_EM_slices1to325 108	89
Label 15	Label 185	TEM_L3_2_EM_slices1to325 109	345
Label 15	Label 185	TEM_L3_2_EM_slices1to325 109	122
Label 15	Label 185	TEM_L3_2_EM_slices1to325 110	361
Label 15	Label 185	TEM_L3_2_EM_slices1to325 110	127
Label 15	Label 185	TEM_L3_2_EM_slices1to325 111	142
Label 15	Label 185	TEM_L3_2_EM_slices1to325 111	134
Label 15	Label 185	TEM_L3_2_EM_slices1to325 111	125
Label 15	Label 185	TEM_L3_2_EM_slices1to325 112	127
Label 15	Label 185	TEM_L3_2_EM_slices1to325 112	106
Label 15	Label 185	TEM_L3_2_EM_slices1to325 113	113
Label 15	Label 185	TEM_L3_2_EM_slices1to325 114	181
Label 15	Label 185	TEM_L3_2_EM_slices1to325 118	6
Label 15	Label 185	TEM_L3_2_EM_slices1to325 122	12
Label 15	Label 185	TEM_L3_2_EM_slices1to325 123	14
Label 15	Label 185	TEM_L3_2_EM_slices1to325 125	7
Label 15	Label 185	TEM_L3_2_EM_slices1to325 126	18
Label 15	Label 185	TEM_L3_2_EM_slices1to325 127	14
Label 15	Label 185	TEM_L3_2_EM_slices1to325 128	10
Label 15	Label 185	TEM_L3_2_EM_slices1to325 129	18
Label 15	Label 185	TEM_L3_2_EM_slices1to325 130	24
Label 15	Label 185	TEM_L3_2_EM_slices1to325 131	14
Label 15	Label 185	TEM_L3_2_EM_slices1to325 132	24
Label 15	Label 185	TEM_L3_2_EM_slices1to325 133	30
Label 15	Label 185	TEM_L3_2_EM_slices1to325 134	26
Label 15	Label 185	TEM_L3_2_EM_slices1to325 135	29
Label 15	Label 185	TEM_L3_2_EM_slices1to325 136	34
Label 15	Label 185	TEM_L3_2_EM_slices1to325 137	31
Label 15	Label 185	TEM_L3_2_EM_slices1to325 138	32
Label 15	Label 185	TEM_L3_2_EM_slices1to325 139	82
Label 15	Label 185	TEM_L3_2_EM_slices1to325 140	111
Label 15	Label 185	TEM_L3_2_EM_slices1to325 141	115
Label 15	Label 185	TEM_L3_2_EM_slices1to325 142	99
Label 15	Label 185	TEM_L3_2_EM_slices1to325 143	96
Label 15	Label 185	TEM_L3_2_EM_slices1to325 144	96
Label 15	Label 185	TEM_L3_2_EM_slices1to325 145	83
Label 15	Label 185	TEM_L3_2_EM_slices1to325 148	87
Label 15	Label 185	TEM_L3_2_EM_slices1to325 149	92
Label 15	Label 185	TEM_L3_2_EM_slices1to325 150	108
Label 15	Label 185	TEM_L3_2_EM_slices1to325 151	129
Label 15	Label 185	TEM_L3_2_EM_slices1to325 152	115
Label 15	Label 185	TEM_L3_2_EM_slices1to325 153	114
Label 15	Label 185	TEM_L3_2_EM_slices1to325 154	104
Label 15	Label 185	TEM_L3_2_EM_slices1to325 155	107
Label 15	Label 185	TEM_L3_2_EM_slices1to325 156	89
Label 15	Label 185	TEM_L3_2_EM_slices1to325 157	93
Label 15	Label 185	TEM_L3_2_EM_slices1to325 158	90
Label 15	Label 185	TEM_L3_2_EM_slices1to325 159	87
Label 15	Label 185	TEM_L3_2_EM_slices1to325 160	62
Label 15	Label 185	TEM_L3_2_EM_slices1to325 161	61
Label 15	Label 185	TEM_L3_2_EM_slices1to325 162	88
Label 15	Label 185	TEM_L3_2_EM_slices1to325 163	69
Label 15	Label 185	TEM_L3_2_EM_slices1to325 164	69
Label 15	Label 185	TEM_L3_2_EM_slices1to325 165	72
Label 15	Label 185	TEM_L3_2_EM_slices1to325 166	68
Label 15	Label 185	TEM_L3_2_EM_slices1to325 167	43
Label 15	Label 185	TEM_L3_2_EM_slices1to325 168	55
Label 15	Label 185	TEM_L3_2_EM_slices1to325 169	85
Label 15	Label 185	TEM_L3_2_EM_slices1to325 170	87
Label 15	Label 185	TEM_L3_2_EM_slices1to325 171	84
Label 15	Label 185	TEM_L3_2_EM_slices1to325 172	49
Label 15	Label 185	TEM_L3_2_EM_slices1to325 173	14
Label 15	Label 185	TEM_L3_2_EM_slices1to325 174	22
Label 15	Label 185	TEM_L3_2_EM_slices1to325 175	31
Label 15	Label 185	TEM_L3_2_EM_slices1to325 176	14
Label 15	Label 185	TEM_L3_2_EM_slices1to325 191	18
Label 15	Label 185	TEM_L3_2_EM_slices1to325 192	30
Label 15	Label 185	TEM_L3_2_EM_slices1to325 193	29
Label 15	Label 185	TEM_L3_2_EM_slices1to325 194	49
Label 15	Label 185	TEM_L3_2_EM_slices1to325 195	32
Label 15	Label 185	TEM_L3_2_EM_slices1to325 196	30
Label 15	Label 185	TEM_L3_2_EM_slices1to325 197	37
Label 15	Label 185	TEM_L3_2_EM_slices1to325 198	28
Label 15	Label 185	TEM_L3_2_EM_slices1to325 199	18
Label 15	Label 185	TEM_L3_2_EM_slices1to325 200	30
Label 15	Label 185	TEM_L3_2_EM_slices1to325 201	4
Label 15	Label 190	TEM_L3_2_EM_slices1to325 84	39
Label 15	Label 194	TEM_L3_2_EM_slices1to325 141	69
Label 15	Label 195	TEM_L3_2_EM_slices1to325 192	28
Label 15	Label 195	TEM_L3_2_EM_slices1to325 193	54
Label 15	Label 195	TEM_L3_2_EM_slices1to325 194	77
Label 15	Label 195	TEM_L3_2_EM_slices1to325 195	89
Label 15	Label 195	TEM_L3_2_EM_slices1to325 196	104
Label 15	Label 195	TEM_L3_2_EM_slices1to325 197	115
Label 15	Label 195	TEM_L3_2_EM_slices1to325 198	114
Label 15	Label 195	TEM_L3_2_EM_slices1to325 199	103
Label 15	Label 195	TEM_L3_2_EM_slices1to325 200	108
Label 15	Label 195	TEM_L3_2_EM_slices1to325 201	87
Label 15	Label 195	TEM_L3_2_EM_slices1to325 202	83
Label 15	Label 195	TEM_L3_2_EM_slices1to325 203	67
Label 15	Label 195	TEM_L3_2_EM_slices1to325 204	43
Label 15	Label 196	TEM_L3_2_EM_slices1to325 132	434
Label 15	Label 196	TEM_L3_2_EM_slices1to325 133	154
Label 15	Label 196	TEM_L3_2_EM_slices1to325 134	80
Label 16	Label 24	TEM_L3_2_EM_slices1to325 191	42
Label 16	Label 24	TEM_L3_2_EM_slices1to325 192	41
Label 16	Label 24	TEM_L3_2_EM_slices1to325 193	18
Label 16	Label 29	TEM_L3_2_EM_slices1to325 115	2
Label 16	Label 32	TEM_L3_2_EM_slices1to325 155	6
Label 16	Label 32	TEM_L3_2_EM_slices1to325 156	6
Label 16	Label 32	TEM_L3_2_EM_slices1to325 161	6
Label 16	Label 44	TEM_L3_2_EM_slices1to325 116	261
Label 16	Label 44	TEM_L3_2_EM_slices1to325 117	346
Label 16	Label 44	TEM_L3_2_EM_slices1to325 118	236
Label 16	Label 44	TEM_L3_2_EM_slices1to325 122	30
Label 16	Label 44	TEM_L3_2_EM_slices1to325 123	13
Label 16	Label 44	TEM_L3_2_EM_slices1to325 137	107
Label 16	Label 48	TEM_L3_2_EM_slices1to325 51	34
Label 16	Label 48	TEM_L3_2_EM_slices1to325 52	110
Label 16	Label 48	TEM_L3_2_EM_slices1to325 52	50
Label 16	Label 48	TEM_L3_2_EM_slices1to325 53	91
Label 16	Label 48	TEM_L3_2_EM_slices1to325 53	70
Label 16	Label 48	TEM_L3_2_EM_slices1to325 54	110
Label 16	Label 48	TEM_L3_2_EM_slices1to325 54	62
Label 16	Label 48	TEM_L3_2_EM_slices1to325 55	110
Label 16	Label 48	TEM_L3_2_EM_slices1to325 55	94
Label 16	Label 48	TEM_L3_2_EM_slices1to325 56	147
Label 16	Label 48	TEM_L3_2_EM_slices1to325 56	117
Label 16	Label 48	TEM_L3_2_EM_slices1to325 57	229
Label 16	Label 48	TEM_L3_2_EM_slices1to325 57	117
Label 16	Label 48	TEM_L3_2_EM_slices1to325 58	326
Label 16	Label 48	TEM_L3_2_EM_slices1to325 58	174
Label 16	Label 48	TEM_L3_2_EM_slices1to325 59	359
Label 16	Label 48	TEM_L3_2_EM_slices1to325 59	154
Label 16	Label 48	TEM_L3_2_EM_slices1to325 60	280
Label 16	Label 48	TEM_L3_2_EM_slices1to325 60	135
Label 16	Label 48	TEM_L3_2_EM_slices1to325 61	180
Label 16	Label 48	TEM_L3_2_EM_slices1to325 61	61
Label 16	Label 48	TEM_L3_2_EM_slices1to325 62	99
Label 16	Label 50	TEM_L3_2_EM_slices1to325 45	44
Label 16	Label 50	TEM_L3_2_EM_slices1to325 46	79
Label 16	Label 50	TEM_L3_2_EM_slices1to325 47	91
Label 16	Label 50	TEM_L3_2_EM_slices1to325 48	109
Label 16	Label 50	TEM_L3_2_EM_slices1to325 49	150
Label 16	Label 50	TEM_L3_2_EM_slices1to325 50	207
Label 16	Label 50	TEM_L3_2_EM_slices1to325 51	255
Label 16	Label 50	TEM_L3_2_EM_slices1to325 52	130
Label 16	Label 50	TEM_L3_2_EM_slices1to325 52	58
Label 16	Label 50	TEM_L3_2_EM_slices1to325 53	110
Label 16	Label 50	TEM_L3_2_EM_slices1to325 53	94
Label 16	Label 50	TEM_L3_2_EM_slices1to325 54	96
Label 16	Label 50	TEM_L3_2_EM_slices1to325 54	80
Label 16	Label 50	TEM_L3_2_EM_slices1to325 55	78
Label 16	Label 50	TEM_L3_2_EM_slices1to325 55	32
Label 16	Label 50	TEM_L3_2_EM_slices1to325 56	82
Label 16	Label 50	TEM_L3_2_EM_slices1to325 56	8
Label 16	Label 50	TEM_L3_2_EM_slices1to325 57	85
Label 16	Label 50	TEM_L3_2_EM_slices1to325 57	36
Label 16	Label 50	TEM_L3_2_EM_slices1to325 58	84
Label 16	Label 50	TEM_L3_2_EM_slices1to325 59	122
Label 16	Label 50	TEM_L3_2_EM_slices1to325 59	100
Label 16	Label 50	TEM_L3_2_EM_slices1to325 60	88
Label 16	Label 50	TEM_L3_2_EM_slices1to325 60	52
Label 16	Label 50	TEM_L3_2_EM_slices1to325 61	94
Label 16	Label 50	TEM_L3_2_EM_slices1to325 62	106
Label 16	Label 50	TEM_L3_2_EM_slices1to325 63	92
Label 16	Label 50	TEM_L3_2_EM_slices1to325 64	90
Label 16	Label 50	TEM_L3_2_EM_slices1to325 65	89
Label 16	Label 50	TEM_L3_2_EM_slices1to325 66	74
Label 16	Label 50	TEM_L3_2_EM_slices1to325 67	51
Label 16	Label 50	TEM_L3_2_EM_slices1to325 68	34
Label 16	Label 54	TEM_L3_2_EM_slices1to325 149	76
Label 16	Label 54	TEM_L3_2_EM_slices1to325 150	140
Label 16	Label 54	TEM_L3_2_EM_slices1to325 151	146
Label 16	Label 54	TEM_L3_2_EM_slices1to325 152	151
Label 16	Label 63	TEM_L3_2_EM_slices1to325 86	148
Label 16	Label 63	TEM_L3_2_EM_slices1to325 87	119
Label 16	Label 63	TEM_L3_2_EM_slices1to325 88	118
Label 16	Label 63	TEM_L3_2_EM_slices1to325 89	98
Label 16	Label 63	TEM_L3_2_EM_slices1to325 89	68
Label 16	Label 63	TEM_L3_2_EM_slices1to325 90	116
Label 16	Label 63	TEM_L3_2_EM_slices1to325 91	45
Label 16	Label 63	TEM_L3_2_EM_slices1to325 95	2
Label 16	Label 63	TEM_L3_2_EM_slices1to325 96	40
Label 16	Label 63	TEM_L3_2_EM_slices1to325 97	48
Label 16	Label 63	TEM_L3_2_EM_slices1to325 98	74
Label 16	Label 63	TEM_L3_2_EM_slices1to325 99	91
Label 16	Label 63	TEM_L3_2_EM_slices1to325 100	84
Label 16	Label 63	TEM_L3_2_EM_slices1to325 101	80
Label 16	Label 63	TEM_L3_2_EM_slices1to325 102	60
Label 16	Label 65	TEM_L3_2_EM_slices1to325 116	54
Label 16	Label 65	TEM_L3_2_EM_slices1to325 117	69
Label 16	Label 65	TEM_L3_2_EM_slices1to325 118	93
Label 16	Label 65	TEM_L3_2_EM_slices1to325 119	72
Label 16	Label 65	TEM_L3_2_EM_slices1to325 120	91
Label 16	Label 65	TEM_L3_2_EM_slices1to325 121	86
Label 16	Label 65	TEM_L3_2_EM_slices1to325 122	99
Label 16	Label 65	TEM_L3_2_EM_slices1to325 123	58
Label 16	Label 65	TEM_L3_2_EM_slices1to325 124	56
Label 16	Label 65	TEM_L3_2_EM_slices1to325 125	84
Label 16	Label 65	TEM_L3_2_EM_slices1to325 126	53
Label 16	Label 69	TEM_L3_2_EM_slices1to325 117	127
Label 16	Label 69	TEM_L3_2_EM_slices1to325 118	294
Label 16	Label 69	TEM_L3_2_EM_slices1to325 119	265
Label 16	Label 69	TEM_L3_2_EM_slices1to325 120	195
Label 16	Label 69	TEM_L3_2_EM_slices1to325 121	173
Label 16	Label 69	TEM_L3_2_EM_slices1to325 122	169
Label 16	Label 69	TEM_L3_2_EM_slices1to325 123	304
Label 16	Label 69	TEM_L3_2_EM_slices1to325 124	199
Label 16	Label 69	TEM_L3_2_EM_slices1to325 125	201
Label 16	Label 69	TEM_L3_2_EM_slices1to325 126	186
Label 16	Label 69	TEM_L3_2_EM_slices1to325 127	151
Label 16	Label 69	TEM_L3_2_EM_slices1to325 128	134
Label 16	Label 69	TEM_L3_2_EM_slices1to325 129	122
Label 16	Label 69	TEM_L3_2_EM_slices1to325 130	97
Label 16	Label 69	TEM_L3_2_EM_slices1to325 131	87
Label 16	Label 69	TEM_L3_2_EM_slices1to325 132	51
Label 16	Label 69	TEM_L3_2_EM_slices1to325 133	120
Label 16	Label 69	TEM_L3_2_EM_slices1to325 134	258
Label 16	Label 69	TEM_L3_2_EM_slices1to325 135	129
Label 16	Label 69	TEM_L3_2_EM_slices1to325 136	143
Label 16	Label 69	TEM_L3_2_EM_slices1to325 137	202
Label 16	Label 69	TEM_L3_2_EM_slices1to325 138	224
Label 16	Label 69	TEM_L3_2_EM_slices1to325 139	211
Label 16	Label 69	TEM_L3_2_EM_slices1to325 140	175
Label 16	Label 69	TEM_L3_2_EM_slices1to325 141	166
Label 16	Label 69	TEM_L3_2_EM_slices1to325 142	164
Label 16	Label 69	TEM_L3_2_EM_slices1to325 143	149
Label 16	Label 69	TEM_L3_2_EM_slices1to325 144	140
Label 16	Label 69	TEM_L3_2_EM_slices1to325 145	224
Label 16	Label 69	TEM_L3_2_EM_slices1to325 146	237
Label 16	Label 69	TEM_L3_2_EM_slices1to325 147	353
Label 16	Label 69	TEM_L3_2_EM_slices1to325 148	395
Label 16	Label 69	TEM_L3_2_EM_slices1to325 149	419
Label 16	Label 69	TEM_L3_2_EM_slices1to325 150	406
Label 16	Label 69	TEM_L3_2_EM_slices1to325 151	472
Label 16	Label 69	TEM_L3_2_EM_slices1to325 152	497
Label 16	Label 69	TEM_L3_2_EM_slices1to325 153	479
Label 16	Label 69	TEM_L3_2_EM_slices1to325 154	528
Label 16	Label 69	TEM_L3_2_EM_slices1to325 155	550
Label 16	Label 69	TEM_L3_2_EM_slices1to325 156	654
Label 16	Label 69	TEM_L3_2_EM_slices1to325 157	669
Label 16	Label 69	TEM_L3_2_EM_slices1to325 158	596
Label 16	Label 69	TEM_L3_2_EM_slices1to325 159	559
Label 16	Label 69	TEM_L3_2_EM_slices1to325 160	611
Label 16	Label 69	TEM_L3_2_EM_slices1to325 161	536
Label 16	Label 69	TEM_L3_2_EM_slices1to325 162	569
Label 16	Label 69	TEM_L3_2_EM_slices1to325 163	544
Label 16	Label 69	TEM_L3_2_EM_slices1to325 164	539
Label 16	Label 69	TEM_L3_2_EM_slices1to325 165	526
Label 16	Label 69	TEM_L3_2_EM_slices1to325 166	468
Label 16	Label 69	TEM_L3_2_EM_slices1to325 167	442
Label 16	Label 69	TEM_L3_2_EM_slices1to325 168	460
Label 16	Label 69	TEM_L3_2_EM_slices1to325 169	436
Label 16	Label 69	TEM_L3_2_EM_slices1to325 170	429
Label 16	Label 69	TEM_L3_2_EM_slices1to325 171	423
Label 16	Label 69	TEM_L3_2_EM_slices1to325 172	409
Label 16	Label 69	TEM_L3_2_EM_slices1to325 173	383
Label 16	Label 69	TEM_L3_2_EM_slices1to325 174	374
Label 16	Label 69	TEM_L3_2_EM_slices1to325 175	346
Label 16	Label 69	TEM_L3_2_EM_slices1to325 176	307
Label 16	Label 69	TEM_L3_2_EM_slices1to325 177	245
Label 16	Label 69	TEM_L3_2_EM_slices1to325 178	197
Label 16	Label 69	TEM_L3_2_EM_slices1to325 179	180
Label 16	Label 69	TEM_L3_2_EM_slices1to325 180	161
Label 16	Label 69	TEM_L3_2_EM_slices1to325 181	162
Label 16	Label 69	TEM_L3_2_EM_slices1to325 182	136
Label 16	Label 69	TEM_L3_2_EM_slices1to325 183	146
Label 16	Label 69	TEM_L3_2_EM_slices1to325 184	139
Label 16	Label 69	TEM_L3_2_EM_slices1to325 185	131
Label 16	Label 69	TEM_L3_2_EM_slices1to325 186	105
Label 16	Label 69	TEM_L3_2_EM_slices1to325 187	99
Label 16	Label 69	TEM_L3_2_EM_slices1to325 188	74
Label 16	Label 69	TEM_L3_2_EM_slices1to325 189	30
Label 16	Label 72	TEM_L3_2_EM_slices1to325 118	97
Label 16	Label 72	TEM_L3_2_EM_slices1to325 119	94
Label 16	Label 72	TEM_L3_2_EM_slices1to325 120	69
Label 16	Label 72	TEM_L3_2_EM_slices1to325 121	50
Label 16	Label 72	TEM_L3_2_EM_slices1to325 122	47
Label 16	Label 72	TEM_L3_2_EM_slices1to325 123	123
Label 16	Label 72	TEM_L3_2_EM_slices1to325 123	38
Label 16	Label 72	TEM_L3_2_EM_slices1to325 124	96
Label 16	Label 72	TEM_L3_2_EM_slices1to325 125	152
Label 16	Label 72	TEM_L3_2_EM_slices1to325 126	212
Label 16	Label 72	TEM_L3_2_EM_slices1to325 127	216
Label 16	Label 72	TEM_L3_2_EM_slices1to325 128	225
Label 16	Label 72	TEM_L3_2_EM_slices1to325 129	233
Label 16	Label 72	TEM_L3_2_EM_slices1to325 130	247
Label 16	Label 72	TEM_L3_2_EM_slices1to325 131	241
Label 16	Label 72	TEM_L3_2_EM_slices1to325 135	276
Label 16	Label 72	TEM_L3_2_EM_slices1to325 136	198
Label 16	Label 72	TEM_L3_2_EM_slices1to325 138	189
Label 16	Label 72	TEM_L3_2_EM_slices1to325 139	188
Label 16	Label 72	TEM_L3_2_EM_slices1to325 140	192
Label 16	Label 72	TEM_L3_2_EM_slices1to325 141	199
Label 16	Label 72	TEM_L3_2_EM_slices1to325 142	196
Label 16	Label 72	TEM_L3_2_EM_slices1to325 142	22
Label 16	Label 72	TEM_L3_2_EM_slices1to325 143	166
Label 16	Label 72	TEM_L3_2_EM_slices1to325 143	36
Label 16	Label 72	TEM_L3_2_EM_slices1to325 144	167
Label 16	Label 72	TEM_L3_2_EM_slices1to325 144	76
Label 16	Label 72	TEM_L3_2_EM_slices1to325 145	163
Label 16	Label 72	TEM_L3_2_EM_slices1to325 145	76
Label 16	Label 72	TEM_L3_2_EM_slices1to325 146	194
Label 16	Label 72	TEM_L3_2_EM_slices1to325 146	30
Label 16	Label 72	TEM_L3_2_EM_slices1to325 147	181
Label 16	Label 72	TEM_L3_2_EM_slices1to325 147	16
Label 16	Label 72	TEM_L3_2_EM_slices1to325 148	188
Label 16	Label 72	TEM_L3_2_EM_slices1to325 148	20
Label 16	Label 72	TEM_L3_2_EM_slices1to325 149	206
Label 16	Label 72	TEM_L3_2_EM_slices1to325 149	36
Label 16	Label 72	TEM_L3_2_EM_slices1to325 150	192
Label 16	Label 72	TEM_L3_2_EM_slices1to325 150	30
Label 16	Label 72	TEM_L3_2_EM_slices1to325 151	202
Label 16	Label 72	TEM_L3_2_EM_slices1to325 151	34
Label 16	Label 72	TEM_L3_2_EM_slices1to325 152	195
Label 16	Label 72	TEM_L3_2_EM_slices1to325 152	104
Label 16	Label 72	TEM_L3_2_EM_slices1to325 153	205
Label 16	Label 72	TEM_L3_2_EM_slices1to325 153	95
Label 16	Label 72	TEM_L3_2_EM_slices1to325 154	205
Label 16	Label 72	TEM_L3_2_EM_slices1to325 154	183
Label 16	Label 72	TEM_L3_2_EM_slices1to325 155	233
Label 16	Label 72	TEM_L3_2_EM_slices1to325 156	216
Label 16	Label 72	TEM_L3_2_EM_slices1to325 157	235
Label 16	Label 72	TEM_L3_2_EM_slices1to325 158	238
Label 16	Label 72	TEM_L3_2_EM_slices1to325 158	1
Label 16	Label 72	TEM_L3_2_EM_slices1to325 159	241
Label 16	Label 72	TEM_L3_2_EM_slices1to325 159	2
Label 16	Label 72	TEM_L3_2_EM_slices1to325 160	245
Label 16	Label 72	TEM_L3_2_EM_slices1to325 160	40
Label 16	Label 72	TEM_L3_2_EM_slices1to325 161	291
Label 16	Label 72	TEM_L3_2_EM_slices1to325 161	51
Label 16	Label 72	TEM_L3_2_EM_slices1to325 162	281
Label 16	Label 72	TEM_L3_2_EM_slices1to325 162	68
Label 16	Label 72	TEM_L3_2_EM_slices1to325 163	267
Label 16	Label 72	TEM_L3_2_EM_slices1to325 163	81
Label 16	Label 72	TEM_L3_2_EM_slices1to325 164	289
Label 16	Label 72	TEM_L3_2_EM_slices1to325 164	108
Label 16	Label 72	TEM_L3_2_EM_slices1to325 164	61
Label 16	Label 72	TEM_L3_2_EM_slices1to325 165	294
Label 16	Label 72	TEM_L3_2_EM_slices1to325 165	104
Label 16	Label 72	TEM_L3_2_EM_slices1to325 166	263
Label 16	Label 72	TEM_L3_2_EM_slices1to325 166	124
Label 16	Label 72	TEM_L3_2_EM_slices1to325 166	104
Label 16	Label 72	TEM_L3_2_EM_slices1to325 167	245
Label 16	Label 72	TEM_L3_2_EM_slices1to325 167	139
Label 16	Label 72	TEM_L3_2_EM_slices1to325 167	122
Label 16	Label 72	TEM_L3_2_EM_slices1to325 168	253
Label 16	Label 72	TEM_L3_2_EM_slices1to325 168	123
Label 16	Label 72	TEM_L3_2_EM_slices1to325 168	117
Label 16	Label 72	TEM_L3_2_EM_slices1to325 169	230
Label 16	Label 72	TEM_L3_2_EM_slices1to325 169	131
Label 16	Label 72	TEM_L3_2_EM_slices1to325 170	133
Label 16	Label 72	TEM_L3_2_EM_slices1to325 170	117
Label 16	Label 72	TEM_L3_2_EM_slices1to325 170	56
Label 16	Label 72	TEM_L3_2_EM_slices1to325 171	127
Label 16	Label 72	TEM_L3_2_EM_slices1to325 171	82
Label 16	Label 72	TEM_L3_2_EM_slices1to325 171	48
Label 16	Label 72	TEM_L3_2_EM_slices1to325 172	122
Label 16	Label 72	TEM_L3_2_EM_slices1to325 172	17
Label 16	Label 72	TEM_L3_2_EM_slices1to325 173	111
Label 16	Label 72	TEM_L3_2_EM_slices1to325 174	122
Label 16	Label 72	TEM_L3_2_EM_slices1to325 175	124
Label 16	Label 72	TEM_L3_2_EM_slices1to325 176	116
Label 16	Label 72	TEM_L3_2_EM_slices1to325 177	110
Label 16	Label 72	TEM_L3_2_EM_slices1to325 178	104
Label 16	Label 72	TEM_L3_2_EM_slices1to325 179	93
Label 16	Label 72	TEM_L3_2_EM_slices1to325 180	90
Label 16	Label 72	TEM_L3_2_EM_slices1to325 181	78
Label 16	Label 72	TEM_L3_2_EM_slices1to325 182	71
Label 16	Label 72	TEM_L3_2_EM_slices1to325 183	76
Label 16	Label 72	TEM_L3_2_EM_slices1to325 184	62
Label 16	Label 72	TEM_L3_2_EM_slices1to325 185	58
Label 16	Label 72	TEM_L3_2_EM_slices1to325 186	56
Label 16	Label 72	TEM_L3_2_EM_slices1to325 187	59
Label 16	Label 72	TEM_L3_2_EM_slices1to325 188	58
Label 16	Label 72	TEM_L3_2_EM_slices1to325 189	70
Label 16	Label 72	TEM_L3_2_EM_slices1to325 190	75
Label 16	Label 72	TEM_L3_2_EM_slices1to325 191	71
Label 16	Label 72	TEM_L3_2_EM_slices1to325 192	68
Label 16	Label 72	TEM_L3_2_EM_slices1to325 193	64
Label 16	Label 72	TEM_L3_2_EM_slices1to325 194	68
Label 16	Label 72	TEM_L3_2_EM_slices1to325 195	44
Label 16	Label 72	TEM_L3_2_EM_slices1to325 196	55
Label 16	Label 72	TEM_L3_2_EM_slices1to325 197	42
Label 16	Label 72	TEM_L3_2_EM_slices1to325 198	48
Label 16	Label 72	TEM_L3_2_EM_slices1to325 199	46
Label 16	Label 72	TEM_L3_2_EM_slices1to325 200	46
Label 16	Label 72	TEM_L3_2_EM_slices1to325 201	47
Label 16	Label 72	TEM_L3_2_EM_slices1to325 202	41
Label 16	Label 72	TEM_L3_2_EM_slices1to325 203	43
Label 16	Label 72	TEM_L3_2_EM_slices1to325 204	49
Label 16	Label 72	TEM_L3_2_EM_slices1to325 205	57
Label 16	Label 72	TEM_L3_2_EM_slices1to325 206	47
Label 16	Label 72	TEM_L3_2_EM_slices1to325 207	24
Label 16	Label 72	TEM_L3_2_EM_slices1to325 208	15
Label 16	Label 72	TEM_L3_2_EM_slices1to325 222	2
Label 16	Label 73	TEM_L3_2_EM_slices1to325 86	32
Label 16	Label 73	TEM_L3_2_EM_slices1to325 87	38
Label 16	Label 73	TEM_L3_2_EM_slices1to325 88	48
Label 16	Label 73	TEM_L3_2_EM_slices1to325 89	59
Label 16	Label 73	TEM_L3_2_EM_slices1to325 90	44
Label 16	Label 73	TEM_L3_2_EM_slices1to325 91	56
Label 16	Label 73	TEM_L3_2_EM_slices1to325 92	56
Label 16	Label 73	TEM_L3_2_EM_slices1to325 93	45
Label 16	Label 73	TEM_L3_2_EM_slices1to325 94	39
Label 16	Label 73	TEM_L3_2_EM_slices1to325 95	44
Label 16	Label 73	TEM_L3_2_EM_slices1to325 96	26
Label 16	Label 73	TEM_L3_2_EM_slices1to325 97	31
Label 16	Label 73	TEM_L3_2_EM_slices1to325 98	32
Label 16	Label 73	TEM_L3_2_EM_slices1to325 99	57
Label 16	Label 73	TEM_L3_2_EM_slices1to325 100	47
Label 16	Label 73	TEM_L3_2_EM_slices1to325 101	59
Label 16	Label 73	TEM_L3_2_EM_slices1to325 102	72
Label 16	Label 73	TEM_L3_2_EM_slices1to325 103	63
Label 16	Label 73	TEM_L3_2_EM_slices1to325 104	57
Label 16	Label 73	TEM_L3_2_EM_slices1to325 105	44
Label 16	Label 73	TEM_L3_2_EM_slices1to325 106	43
Label 16	Label 73	TEM_L3_2_EM_slices1to325 107	42
Label 16	Label 73	TEM_L3_2_EM_slices1to325 108	38
Label 16	Label 73	TEM_L3_2_EM_slices1to325 109	30
Label 16	Label 73	TEM_L3_2_EM_slices1to325 110	33
Label 16	Label 73	TEM_L3_2_EM_slices1to325 111	38
Label 16	Label 73	TEM_L3_2_EM_slices1to325 112	28
Label 16	Label 73	TEM_L3_2_EM_slices1to325 113	38
Label 16	Label 73	TEM_L3_2_EM_slices1to325 114	29
Label 16	Label 73	TEM_L3_2_EM_slices1to325 115	35
Label 16	Label 73	TEM_L3_2_EM_slices1to325 116	45
Label 16	Label 73	TEM_L3_2_EM_slices1to325 118	56
Label 16	Label 73	TEM_L3_2_EM_slices1to325 119	67
Label 16	Label 73	TEM_L3_2_EM_slices1to325 120	48
Label 16	Label 73	TEM_L3_2_EM_slices1to325 121	72
Label 16	Label 73	TEM_L3_2_EM_slices1to325 122	83
Label 16	Label 73	TEM_L3_2_EM_slices1to325 123	74
Label 16	Label 73	TEM_L3_2_EM_slices1to325 124	103
Label 16	Label 73	TEM_L3_2_EM_slices1to325 125	109
Label 16	Label 73	TEM_L3_2_EM_slices1to325 126	110
Label 16	Label 73	TEM_L3_2_EM_slices1to325 127	106
Label 16	Label 73	TEM_L3_2_EM_slices1to325 128	78
Label 16	Label 73	TEM_L3_2_EM_slices1to325 129	68
Label 16	Label 73	TEM_L3_2_EM_slices1to325 130	53
Label 16	Label 73	TEM_L3_2_EM_slices1to325 131	52
Label 16	Label 73	TEM_L3_2_EM_slices1to325 132	56
Label 16	Label 73	TEM_L3_2_EM_slices1to325 133	47
Label 16	Label 73	TEM_L3_2_EM_slices1to325 134	36
Label 16	Label 73	TEM_L3_2_EM_slices1to325 135	33
Label 16	Label 73	TEM_L3_2_EM_slices1to325 136	42
Label 16	Label 73	TEM_L3_2_EM_slices1to325 137	43
Label 16	Label 73	TEM_L3_2_EM_slices1to325 138	39
Label 16	Label 73	TEM_L3_2_EM_slices1to325 139	47
Label 16	Label 73	TEM_L3_2_EM_slices1to325 140	66
Label 16	Label 73	TEM_L3_2_EM_slices1to325 141	57
Label 16	Label 73	TEM_L3_2_EM_slices1to325 142	60
Label 16	Label 73	TEM_L3_2_EM_slices1to325 143	76
Label 16	Label 73	TEM_L3_2_EM_slices1to325 144	90
Label 16	Label 73	TEM_L3_2_EM_slices1to325 145	85
Label 16	Label 73	TEM_L3_2_EM_slices1to325 148	55
Label 16	Label 73	TEM_L3_2_EM_slices1to325 149	75
Label 16	Label 73	TEM_L3_2_EM_slices1to325 150	94
Label 16	Label 73	TEM_L3_2_EM_slices1to325 151	114
Label 16	Label 73	TEM_L3_2_EM_slices1to325 152	139
Label 16	Label 73	TEM_L3_2_EM_slices1to325 153	172
Label 16	Label 73	TEM_L3_2_EM_slices1to325 154	171
Label 16	Label 73	TEM_L3_2_EM_slices1to325 155	93
Label 16	Label 73	TEM_L3_2_EM_slices1to325 156	74
Label 16	Label 73	TEM_L3_2_EM_slices1to325 157	66
Label 16	Label 73	TEM_L3_2_EM_slices1to325 158	74
Label 16	Label 73	TEM_L3_2_EM_slices1to325 159	72
Label 16	Label 73	TEM_L3_2_EM_slices1to325 160	65
Label 16	Label 73	TEM_L3_2_EM_slices1to325 161	69
Label 16	Label 73	TEM_L3_2_EM_slices1to325 162	74
Label 16	Label 73	TEM_L3_2_EM_slices1to325 163	118
Label 16	Label 73	TEM_L3_2_EM_slices1to325 164	104
Label 16	Label 73	TEM_L3_2_EM_slices1to325 165	111
Label 16	Label 73	TEM_L3_2_EM_slices1to325 166	46
Label 16	Label 73	TEM_L3_2_EM_slices1to325 172	6
Label 16	Label 73	TEM_L3_2_EM_slices1to325 174	32
Label 16	Label 73	TEM_L3_2_EM_slices1to325 175	48
Label 16	Label 73	TEM_L3_2_EM_slices1to325 176	80
Label 16	Label 73	TEM_L3_2_EM_slices1to325 177	46
Label 16	Label 73	TEM_L3_2_EM_slices1to325 178	34
Label 16	Label 73	TEM_L3_2_EM_slices1to325 179	54
Label 16	Label 73	TEM_L3_2_EM_slices1to325 180	68
Label 16	Label 73	TEM_L3_2_EM_slices1to325 181	70
Label 16	Label 73	TEM_L3_2_EM_slices1to325 182	74
Label 16	Label 73	TEM_L3_2_EM_slices1to325 183	63
Label 16	Label 73	TEM_L3_2_EM_slices1to325 184	40
Label 16	Label 73	TEM_L3_2_EM_slices1to325 185	26
Label 16	Label 77	TEM_L3_2_EM_slices1to325 107	131
Label 16	Label 77	TEM_L3_2_EM_slices1to325 108	299
Label 16	Label 82	TEM_L3_2_EM_slices1to325 199	43
Label 16	Label 82	TEM_L3_2_EM_slices1to325 200	47
Label 16	Label 82	TEM_L3_2_EM_slices1to325 201	45
Label 16	Label 82	TEM_L3_2_EM_slices1to325 202	33
Label 16	Label 82	TEM_L3_2_EM_slices1to325 203	37
Label 16	Label 85	TEM_L3_2_EM_slices1to325 63	79
Label 16	Label 85	TEM_L3_2_EM_slices1to325 64	150
Label 16	Label 85	TEM_L3_2_EM_slices1to325 64	67
Label 16	Label 85	TEM_L3_2_EM_slices1to325 65	133
Label 16	Label 85	TEM_L3_2_EM_slices1to325 65	85
Label 16	Label 85	TEM_L3_2_EM_slices1to325 65	22
Label 16	Label 85	TEM_L3_2_EM_slices1to325 66	120
Label 16	Label 85	TEM_L3_2_EM_slices1to325 66	110
Label 16	Label 85	TEM_L3_2_EM_slices1to325 67	198
Label 16	Label 85	TEM_L3_2_EM_slices1to325 67	98
Label 16	Label 85	TEM_L3_2_EM_slices1to325 81	191
Label 16	Label 85	TEM_L3_2_EM_slices1to325 82	226
Label 16	Label 85	TEM_L3_2_EM_slices1to325 83	154
Label 16	Label 85	TEM_L3_2_EM_slices1to325 84	58
Label 16	Label 86	TEM_L3_2_EM_slices1to325 138	40
Label 16	Label 86	TEM_L3_2_EM_slices1to325 139	39
Label 16	Label 86	TEM_L3_2_EM_slices1to325 140	48
Label 16	Label 86	TEM_L3_2_EM_slices1to325 141	68
Label 16	Label 86	TEM_L3_2_EM_slices1to325 142	81
Label 16	Label 86	TEM_L3_2_EM_slices1to325 143	89
Label 16	Label 86	TEM_L3_2_EM_slices1to325 144	90
Label 16	Label 86	TEM_L3_2_EM_slices1to325 145	98
Label 16	Label 86	TEM_L3_2_EM_slices1to325 146	85
Label 16	Label 86	TEM_L3_2_EM_slices1to325 147	65
Label 16	Label 86	TEM_L3_2_EM_slices1to325 148	17
Label 16	Label 86	TEM_L3_2_EM_slices1to325 176	2
Label 16	Label 93	TEM_L3_2_EM_slices1to325 53	46
Label 16	Label 93	TEM_L3_2_EM_slices1to325 54	84
Label 16	Label 93	TEM_L3_2_EM_slices1to325 55	74
Label 16	Label 93	TEM_L3_2_EM_slices1to325 56	86
Label 16	Label 93	TEM_L3_2_EM_slices1to325 57	86
Label 16	Label 93	TEM_L3_2_EM_slices1to325 58	85
Label 16	Label 93	TEM_L3_2_EM_slices1to325 59	73
Label 16	Label 93	TEM_L3_2_EM_slices1to325 60	81
Label 16	Label 93	TEM_L3_2_EM_slices1to325 61	77
Label 16	Label 93	TEM_L3_2_EM_slices1to325 62	64
Label 16	Label 93	TEM_L3_2_EM_slices1to325 63	32
Label 16	Label 93	TEM_L3_2_EM_slices1to325 64	49
Label 16	Label 93	TEM_L3_2_EM_slices1to325 65	27
Label 16	Label 93	TEM_L3_2_EM_slices1to325 216	17
Label 16	Label 93	TEM_L3_2_EM_slices1to325 217	26
Label 16	Label 93	TEM_L3_2_EM_slices1to325 218	38
Label 16	Label 93	TEM_L3_2_EM_slices1to325 219	32
Label 16	Label 93	TEM_L3_2_EM_slices1to325 220	23
Label 16	Label 93	TEM_L3_2_EM_slices1to325 221	42
Label 16	Label 93	TEM_L3_2_EM_slices1to325 222	42
Label 16	Label 93	TEM_L3_2_EM_slices1to325 223	41
Label 16	Label 93	TEM_L3_2_EM_slices1to325 224	4
Label 16	Label 100	TEM_L3_2_EM_slices1to325 138	87
Label 16	Label 100	TEM_L3_2_EM_slices1to325 139	97
Label 16	Label 100	TEM_L3_2_EM_slices1to325 140	85
Label 16	Label 100	TEM_L3_2_EM_slices1to325 141	81
Label 16	Label 100	TEM_L3_2_EM_slices1to325 142	59
Label 16	Label 106	TEM_L3_2_EM_slices1to325 115	135
Label 16	Label 106	TEM_L3_2_EM_slices1to325 116	25
Label 16	Label 114	TEM_L3_2_EM_slices1to325 60	36
Label 16	Label 114	TEM_L3_2_EM_slices1to325 61	66
Label 16	Label 114	TEM_L3_2_EM_slices1to325 62	48
Label 16	Label 114	TEM_L3_2_EM_slices1to325 63	32
Label 16	Label 114	TEM_L3_2_EM_slices1to325 64	30
Label 16	Label 114	TEM_L3_2_EM_slices1to325 65	86
Label 16	Label 114	TEM_L3_2_EM_slices1to325 66	118
Label 16	Label 114	TEM_L3_2_EM_slices1to325 67	170
Label 16	Label 114	TEM_L3_2_EM_slices1to325 68	158
Label 16	Label 114	TEM_L3_2_EM_slices1to325 69	140
Label 16	Label 114	TEM_L3_2_EM_slices1to325 70	146
Label 16	Label 114	TEM_L3_2_EM_slices1to325 71	138
Label 16	Label 114	TEM_L3_2_EM_slices1to325 72	117
Label 16	Label 114	TEM_L3_2_EM_slices1to325 73	49
Label 16	Label 114	TEM_L3_2_EM_slices1to325 81	48
Label 16	Label 114	TEM_L3_2_EM_slices1to325 82	76
Label 16	Label 114	TEM_L3_2_EM_slices1to325 83	27
Label 16	Label 114	TEM_L3_2_EM_slices1to325 84	28
Label 16	Label 117	TEM_L3_2_EM_slices1to325 126	201
Label 16	Label 117	TEM_L3_2_EM_slices1to325 127	317
Label 16	Label 117	TEM_L3_2_EM_slices1to325 128	308
Label 16	Label 117	TEM_L3_2_EM_slices1to325 129	119
Label 16	Label 117	TEM_L3_2_EM_slices1to325 130	40
Label 16	Label 118	TEM_L3_2_EM_slices1to325 128	61
Label 16	Label 118	TEM_L3_2_EM_slices1to325 129	119
Label 16	Label 118	TEM_L3_2_EM_slices1to325 130	383
Label 16	Label 118	TEM_L3_2_EM_slices1to325 131	398
Label 16	Label 118	TEM_L3_2_EM_slices1to325 132	313
Label 16	Label 118	TEM_L3_2_EM_slices1to325 133	222
Label 16	Label 118	TEM_L3_2_EM_slices1to325 134	190
Label 16	Label 118	TEM_L3_2_EM_slices1to325 135	158
Label 16	Label 118	TEM_L3_2_EM_slices1to325 136	154
Label 16	Label 118	TEM_L3_2_EM_slices1to325 137	126
Label 16	Label 118	TEM_L3_2_EM_slices1to325 138	74
Label 16	Label 119	TEM_L3_2_EM_slices1to325 95	74
Label 16	Label 119	TEM_L3_2_EM_slices1to325 95	30
Label 16	Label 119	TEM_L3_2_EM_slices1to325 96	49
Label 16	Label 119	TEM_L3_2_EM_slices1to325 96	28
Label 16	Label 119	TEM_L3_2_EM_slices1to325 97	50
Label 16	Label 120	TEM_L3_2_EM_slices1to325 91	12
Label 16	Label 120	TEM_L3_2_EM_slices1to325 92	60
Label 16	Label 120	TEM_L3_2_EM_slices1to325 93	63
Label 16	Label 120	TEM_L3_2_EM_slices1to325 94	50
Label 16	Label 120	TEM_L3_2_EM_slices1to325 95	52
Label 16	Label 120	TEM_L3_2_EM_slices1to325 96	55
Label 16	Label 120	TEM_L3_2_EM_slices1to325 97	61
Label 16	Label 120	TEM_L3_2_EM_slices1to325 98	60
Label 16	Label 120	TEM_L3_2_EM_slices1to325 99	25
Label 16	Label 120	TEM_L3_2_EM_slices1to325 100	54
Label 16	Label 120	TEM_L3_2_EM_slices1to325 101	53
Label 16	Label 120	TEM_L3_2_EM_slices1to325 102	58
Label 16	Label 120	TEM_L3_2_EM_slices1to325 103	71
Label 16	Label 120	TEM_L3_2_EM_slices1to325 104	67
Label 16	Label 120	TEM_L3_2_EM_slices1to325 105	61
Label 16	Label 120	TEM_L3_2_EM_slices1to325 106	56
Label 16	Label 120	TEM_L3_2_EM_slices1to325 107	67
Label 16	Label 120	TEM_L3_2_EM_slices1to325 108	71
Label 16	Label 120	TEM_L3_2_EM_slices1to325 109	65
Label 16	Label 120	TEM_L3_2_EM_slices1to325 110	62
Label 16	Label 120	TEM_L3_2_EM_slices1to325 111	65
Label 16	Label 120	TEM_L3_2_EM_slices1to325 112	60
Label 16	Label 120	TEM_L3_2_EM_slices1to325 113	55
Label 16	Label 120	TEM_L3_2_EM_slices1to325 114	53
Label 16	Label 120	TEM_L3_2_EM_slices1to325 115	47
Label 16	Label 120	TEM_L3_2_EM_slices1to325 119	27
Label 16	Label 120	TEM_L3_2_EM_slices1to325 120	28
Label 16	Label 120	TEM_L3_2_EM_slices1to325 121	29
Label 16	Label 120	TEM_L3_2_EM_slices1to325 122	41
Label 16	Label 120	TEM_L3_2_EM_slices1to325 123	46
Label 16	Label 120	TEM_L3_2_EM_slices1to325 124	55
Label 16	Label 120	TEM_L3_2_EM_slices1to325 125	71
Label 16	Label 120	TEM_L3_2_EM_slices1to325 126	59
Label 16	Label 120	TEM_L3_2_EM_slices1to325 127	73
Label 16	Label 120	TEM_L3_2_EM_slices1to325 128	55
Label 16	Label 120	TEM_L3_2_EM_slices1to325 129	63
Label 16	Label 120	TEM_L3_2_EM_slices1to325 130	49
Label 16	Label 120	TEM_L3_2_EM_slices1to325 131	55
Label 16	Label 120	TEM_L3_2_EM_slices1to325 132	47
Label 16	Label 120	TEM_L3_2_EM_slices1to325 133	40
Label 16	Label 120	TEM_L3_2_EM_slices1to325 134	45
Label 16	Label 120	TEM_L3_2_EM_slices1to325 135	44
Label 16	Label 120	TEM_L3_2_EM_slices1to325 136	41
Label 16	Label 120	TEM_L3_2_EM_slices1to325 137	49
Label 16	Label 120	TEM_L3_2_EM_slices1to325 138	26
Label 16	Label 120	TEM_L3_2_EM_slices1to325 139	39
Label 16	Label 120	TEM_L3_2_EM_slices1to325 140	45
Label 16	Label 120	TEM_L3_2_EM_slices1to325 141	34
Label 16	Label 120	TEM_L3_2_EM_slices1to325 142	42
Label 16	Label 120	TEM_L3_2_EM_slices1to325 143	39
Label 16	Label 120	TEM_L3_2_EM_slices1to325 144	47
Label 16	Label 120	TEM_L3_2_EM_slices1to325 145	35
Label 16	Label 120	TEM_L3_2_EM_slices1to325 148	40
Label 16	Label 120	TEM_L3_2_EM_slices1to325 149	69
Label 16	Label 120	TEM_L3_2_EM_slices1to325 150	81
Label 16	Label 120	TEM_L3_2_EM_slices1to325 151	44
Label 16	Label 120	TEM_L3_2_EM_slices1to325 152	39
Label 16	Label 120	TEM_L3_2_EM_slices1to325 153	40
Label 16	Label 120	TEM_L3_2_EM_slices1to325 169	34
Label 16	Label 120	TEM_L3_2_EM_slices1to325 170	74
Label 16	Label 120	TEM_L3_2_EM_slices1to325 171	116
Label 16	Label 120	TEM_L3_2_EM_slices1to325 172	107
Label 16	Label 120	TEM_L3_2_EM_slices1to325 173	100
Label 16	Label 120	TEM_L3_2_EM_slices1to325 174	114
Label 16	Label 120	TEM_L3_2_EM_slices1to325 175	101
Label 16	Label 120	TEM_L3_2_EM_slices1to325 176	99
Label 16	Label 120	TEM_L3_2_EM_slices1to325 177	87
Label 16	Label 120	TEM_L3_2_EM_slices1to325 178	76
Label 16	Label 120	TEM_L3_2_EM_slices1to325 179	74
Label 16	Label 120	TEM_L3_2_EM_slices1to325 180	84
Label 16	Label 120	TEM_L3_2_EM_slices1to325 181	95
Label 16	Label 120	TEM_L3_2_EM_slices1to325 182	76
Label 16	Label 120	TEM_L3_2_EM_slices1to325 183	107
Label 16	Label 120	TEM_L3_2_EM_slices1to325 184	95
Label 16	Label 120	TEM_L3_2_EM_slices1to325 185	93
Label 16	Label 120	TEM_L3_2_EM_slices1to325 186	93
Label 16	Label 120	TEM_L3_2_EM_slices1to325 187	132
Label 16	Label 120	TEM_L3_2_EM_slices1to325 188	95
Label 16	Label 120	TEM_L3_2_EM_slices1to325 189	66
Label 16	Label 129	TEM_L3_2_EM_slices1to325 168	102
Label 16	Label 129	TEM_L3_2_EM_slices1to325 169	158
Label 16	Label 129	TEM_L3_2_EM_slices1to325 170	196
Label 16	Label 129	TEM_L3_2_EM_slices1to325 171	260
Label 16	Label 129	TEM_L3_2_EM_slices1to325 172	230
Label 16	Label 129	TEM_L3_2_EM_slices1to325 173	136
Label 16	Label 129	TEM_L3_2_EM_slices1to325 174	41
Label 16	Label 129	TEM_L3_2_EM_slices1to325 178	58
Label 16	Label 129	TEM_L3_2_EM_slices1to325 179	104
Label 16	Label 129	TEM_L3_2_EM_slices1to325 180	128
Label 16	Label 129	TEM_L3_2_EM_slices1to325 181	124
Label 16	Label 129	TEM_L3_2_EM_slices1to325 182	112
Label 16	Label 129	TEM_L3_2_EM_slices1to325 183	111
Label 16	Label 129	TEM_L3_2_EM_slices1to325 184	108
Label 16	Label 129	TEM_L3_2_EM_slices1to325 185	112
Label 16	Label 129	TEM_L3_2_EM_slices1to325 186	94
Label 16	Label 129	TEM_L3_2_EM_slices1to325 187	102
Label 16	Label 129	TEM_L3_2_EM_slices1to325 188	84
Label 16	Label 129	TEM_L3_2_EM_slices1to325 189	82
Label 16	Label 134	TEM_L3_2_EM_slices1to325 81	76
Label 16	Label 134	TEM_L3_2_EM_slices1to325 82	108
Label 16	Label 134	TEM_L3_2_EM_slices1to325 83	107
Label 16	Label 134	TEM_L3_2_EM_slices1to325 84	104
Label 16	Label 134	TEM_L3_2_EM_slices1to325 86	57
Label 16	Label 134	TEM_L3_2_EM_slices1to325 87	67
Label 16	Label 134	TEM_L3_2_EM_slices1to325 88	25
Label 16	Label 134	TEM_L3_2_EM_slices1to325 100	1
Label 16	Label 134	TEM_L3_2_EM_slices1to325 101	60
Label 16	Label 134	TEM_L3_2_EM_slices1to325 102	93
Label 16	Label 134	TEM_L3_2_EM_slices1to325 103	90
Label 16	Label 134	TEM_L3_2_EM_slices1to325 104	22
Label 16	Label 134	TEM_L3_2_EM_slices1to325 105	26
Label 16	Label 134	TEM_L3_2_EM_slices1to325 106	42
Label 16	Label 134	TEM_L3_2_EM_slices1to325 107	97
Label 16	Label 134	TEM_L3_2_EM_slices1to325 107	81
Label 16	Label 134	TEM_L3_2_EM_slices1to325 107	50
Label 16	Label 134	TEM_L3_2_EM_slices1to325 108	326
Label 16	Label 134	TEM_L3_2_EM_slices1to325 109	262
Label 16	Label 134	TEM_L3_2_EM_slices1to325 110	79
Label 16	Label 136	TEM_L3_2_EM_slices1to325 141	13
Label 16	Label 136	TEM_L3_2_EM_slices1to325 142	4
Label 16	Label 136	TEM_L3_2_EM_slices1to325 150	42
Label 16	Label 139	TEM_L3_2_EM_slices1to325 91	8
Label 16	Label 139	TEM_L3_2_EM_slices1to325 92	30
Label 16	Label 139	TEM_L3_2_EM_slices1to325 93	48
Label 16	Label 139	TEM_L3_2_EM_slices1to325 94	16
Label 16	Label 139	TEM_L3_2_EM_slices1to325 95	10
Label 16	Label 139	TEM_L3_2_EM_slices1to325 96	22
Label 16	Label 139	TEM_L3_2_EM_slices1to325 97	30
Label 16	Label 139	TEM_L3_2_EM_slices1to325 98	34
Label 16	Label 139	TEM_L3_2_EM_slices1to325 99	34
Label 16	Label 139	TEM_L3_2_EM_slices1to325 100	58
Label 16	Label 139	TEM_L3_2_EM_slices1to325 100	34
Label 16	Label 139	TEM_L3_2_EM_slices1to325 101	34
Label 16	Label 139	TEM_L3_2_EM_slices1to325 101	20
Label 16	Label 139	TEM_L3_2_EM_slices1to325 102	52
Label 16	Label 139	TEM_L3_2_EM_slices1to325 103	104
Label 16	Label 139	TEM_L3_2_EM_slices1to325 104	116
Label 16	Label 139	TEM_L3_2_EM_slices1to325 105	115
Label 16	Label 139	TEM_L3_2_EM_slices1to325 106	190
Label 16	Label 139	TEM_L3_2_EM_slices1to325 107	143
Label 16	Label 139	TEM_L3_2_EM_slices1to325 108	66
Label 16	Label 139	TEM_L3_2_EM_slices1to325 111	58
Label 16	Label 139	TEM_L3_2_EM_slices1to325 111	40
Label 16	Label 140	TEM_L3_2_EM_slices1to325 157	17
Label 16	Label 151	TEM_L3_2_EM_slices1to325 144	69
Label 16	Label 151	TEM_L3_2_EM_slices1to325 145	21
Label 16	Label 152	TEM_L3_2_EM_slices1to325 117	24
Label 16	Label 152	TEM_L3_2_EM_slices1to325 118	14
Label 16	Label 152	TEM_L3_2_EM_slices1to325 143	36
Label 16	Label 152	TEM_L3_2_EM_slices1to325 144	42
Label 16	Label 152	TEM_L3_2_EM_slices1to325 145	35
Label 16	Label 152	TEM_L3_2_EM_slices1to325 146	85
Label 16	Label 152	TEM_L3_2_EM_slices1to325 147	54
Label 16	Label 152	TEM_L3_2_EM_slices1to325 148	57
Label 16	Label 152	TEM_L3_2_EM_slices1to325 149	45
Label 16	Label 152	TEM_L3_2_EM_slices1to325 150	46
Label 16	Label 152	TEM_L3_2_EM_slices1to325 151	80
Label 16	Label 152	TEM_L3_2_EM_slices1to325 152	101
Label 16	Label 152	TEM_L3_2_EM_slices1to325 153	104
Label 16	Label 152	TEM_L3_2_EM_slices1to325 154	122
Label 16	Label 152	TEM_L3_2_EM_slices1to325 154	6
Label 16	Label 152	TEM_L3_2_EM_slices1to325 155	159
Label 16	Label 152	TEM_L3_2_EM_slices1to325 156	165
Label 16	Label 152	TEM_L3_2_EM_slices1to325 157	180
Label 16	Label 152	TEM_L3_2_EM_slices1to325 158	158
Label 16	Label 152	TEM_L3_2_EM_slices1to325 159	103
Label 16	Label 152	TEM_L3_2_EM_slices1to325 160	128
Label 16	Label 152	TEM_L3_2_EM_slices1to325 161	132
Label 16	Label 152	TEM_L3_2_EM_slices1to325 162	105
Label 16	Label 152	TEM_L3_2_EM_slices1to325 163	90
Label 16	Label 162	TEM_L3_2_EM_slices1to325 128	8
Label 16	Label 162	TEM_L3_2_EM_slices1to325 129	28
Label 16	Label 162	TEM_L3_2_EM_slices1to325 130	40
Label 16	Label 164	TEM_L3_2_EM_slices1to325 51	213
Label 16	Label 164	TEM_L3_2_EM_slices1to325 51	55
Label 16	Label 164	TEM_L3_2_EM_slices1to325 52	311
Label 16	Label 164	TEM_L3_2_EM_slices1to325 52	69
Label 16	Label 164	TEM_L3_2_EM_slices1to325 52	23
Label 16	Label 164	TEM_L3_2_EM_slices1to325 53	231
Label 16	Label 164	TEM_L3_2_EM_slices1to325 54	98
Label 16	Label 164	TEM_L3_2_EM_slices1to325 55	71
Label 16	Label 164	TEM_L3_2_EM_slices1to325 56	88
Label 16	Label 164	TEM_L3_2_EM_slices1to325 57	90
Label 16	Label 164	TEM_L3_2_EM_slices1to325 58	90
Label 16	Label 164	TEM_L3_2_EM_slices1to325 59	101
Label 16	Label 164	TEM_L3_2_EM_slices1to325 60	95
Label 16	Label 164	TEM_L3_2_EM_slices1to325 61	100
Label 16	Label 164	TEM_L3_2_EM_slices1to325 62	110
Label 16	Label 164	TEM_L3_2_EM_slices1to325 63	105
Label 16	Label 164	TEM_L3_2_EM_slices1to325 64	48
Label 16	Label 178	TEM_L3_2_EM_slices1to325 121	56
Label 16	Label 178	TEM_L3_2_EM_slices1to325 122	108
Label 16	Label 178	TEM_L3_2_EM_slices1to325 123	163
Label 16	Label 178	TEM_L3_2_EM_slices1to325 123	26
Label 16	Label 178	TEM_L3_2_EM_slices1to325 124	108
Label 16	Label 178	TEM_L3_2_EM_slices1to325 124	60
Label 16	Label 178	TEM_L3_2_EM_slices1to325 125	469
Label 16	Label 178	TEM_L3_2_EM_slices1to325 125	49
Label 16	Label 178	TEM_L3_2_EM_slices1to325 126	418
Label 16	Label 178	TEM_L3_2_EM_slices1to325 126	43
Label 16	Label 178	TEM_L3_2_EM_slices1to325 127	320
Label 16	Label 178	TEM_L3_2_EM_slices1to325 127	46
Label 16	Label 178	TEM_L3_2_EM_slices1to325 128	297
Label 16	Label 178	TEM_L3_2_EM_slices1to325 129	283
Label 16	Label 178	TEM_L3_2_EM_slices1to325 130	206
Label 16	Label 178	TEM_L3_2_EM_slices1to325 131	164
Label 16	Label 185	TEM_L3_2_EM_slices1to325 117	278
Label 16	Label 185	TEM_L3_2_EM_slices1to325 123	36
Label 16	Label 185	TEM_L3_2_EM_slices1to325 124	65
Label 16	Label 185	TEM_L3_2_EM_slices1to325 125	159
Label 16	Label 185	TEM_L3_2_EM_slices1to325 125	70
Label 16	Label 185	TEM_L3_2_EM_slices1to325 126	158
Label 16	Label 185	TEM_L3_2_EM_slices1to325 126	105
Label 16	Label 185	TEM_L3_2_EM_slices1to325 127	265
Label 16	Label 185	TEM_L3_2_EM_slices1to325 127	108
Label 16	Label 185	TEM_L3_2_EM_slices1to325 128	446
Label 16	Label 185	TEM_L3_2_EM_slices1to325 129	464
Label 16	Label 185	TEM_L3_2_EM_slices1to325 129	50
Label 16	Label 185	TEM_L3_2_EM_slices1to325 130	464
Label 16	Label 185	TEM_L3_2_EM_slices1to325 130	67
Label 16	Label 185	TEM_L3_2_EM_slices1to325 131	386
Label 16	Label 185	TEM_L3_2_EM_slices1to325 131	86
Label 16	Label 185	TEM_L3_2_EM_slices1to325 132	177
Label 16	Label 185	TEM_L3_2_EM_slices1to325 132	111
Label 16	Label 185	TEM_L3_2_EM_slices1to325 133	176
Label 16	Label 185	TEM_L3_2_EM_slices1to325 133	131
Label 16	Label 185	TEM_L3_2_EM_slices1to325 134	173
Label 16	Label 185	TEM_L3_2_EM_slices1to325 134	133
Label 16	Label 185	TEM_L3_2_EM_slices1to325 134	50
Label 16	Label 185	TEM_L3_2_EM_slices1to325 135	183
Label 16	Label 185	TEM_L3_2_EM_slices1to325 135	157
Label 16	Label 185	TEM_L3_2_EM_slices1to325 135	89
Label 16	Label 185	TEM_L3_2_EM_slices1to325 135	74
Label 16	Label 185	TEM_L3_2_EM_slices1to325 136	235
Label 16	Label 185	TEM_L3_2_EM_slices1to325 136	101
Label 16	Label 185	TEM_L3_2_EM_slices1to325 136	78
Label 16	Label 185	TEM_L3_2_EM_slices1to325 137	256
Label 16	Label 185	TEM_L3_2_EM_slices1to325 137	86
Label 16	Label 185	TEM_L3_2_EM_slices1to325 137	67
Label 16	Label 185	TEM_L3_2_EM_slices1to325 138	202
Label 16	Label 185	TEM_L3_2_EM_slices1to325 138	131
Label 16	Label 185	TEM_L3_2_EM_slices1to325 138	78
Label 16	Label 185	TEM_L3_2_EM_slices1to325 139	217
Label 16	Label 185	TEM_L3_2_EM_slices1to325 139	191
Label 16	Label 185	TEM_L3_2_EM_slices1to325 139	49
Label 16	Label 185	TEM_L3_2_EM_slices1to325 140	395
Label 16	Label 185	TEM_L3_2_EM_slices1to325 141	345
Label 16	Label 185	TEM_L3_2_EM_slices1to325 142	246
Label 16	Label 185	TEM_L3_2_EM_slices1to325 143	205
Label 16	Label 185	TEM_L3_2_EM_slices1to325 144	233
Label 16	Label 185	TEM_L3_2_EM_slices1to325 145	284
Label 16	Label 185	TEM_L3_2_EM_slices1to325 146	217
Label 16	Label 185	TEM_L3_2_EM_slices1to325 147	324
Label 16	Label 185	TEM_L3_2_EM_slices1to325 148	381
Label 16	Label 185	TEM_L3_2_EM_slices1to325 149	359
Label 16	Label 185	TEM_L3_2_EM_slices1to325 150	348
Label 16	Label 185	TEM_L3_2_EM_slices1to325 151	344
Label 16	Label 185	TEM_L3_2_EM_slices1to325 152	327
Label 16	Label 185	TEM_L3_2_EM_slices1to325 153	382
Label 16	Label 185	TEM_L3_2_EM_slices1to325 154	440
Label 16	Label 185	TEM_L3_2_EM_slices1to325 155	261
Label 16	Label 185	TEM_L3_2_EM_slices1to325 156	111
Label 16	Label 192	TEM_L3_2_EM_slices1to325 132	2
Label 16	Label 192	TEM_L3_2_EM_slices1to325 133	40
Label 16	Label 192	TEM_L3_2_EM_slices1to325 134	39
Label 16	Label 192	TEM_L3_2_EM_slices1to325 137	1
Label 16	Label 193	TEM_L3_2_EM_slices1to325 45	77
Label 16	Label 193	TEM_L3_2_EM_slices1to325 46	138
Label 16	Label 193	TEM_L3_2_EM_slices1to325 47	176
Label 16	Label 193	TEM_L3_2_EM_slices1to325 48	206
Label 16	Label 193	TEM_L3_2_EM_slices1to325 49	240
Label 16	Label 193	TEM_L3_2_EM_slices1to325 50	262
Label 16	Label 193	TEM_L3_2_EM_slices1to325 51	257
Label 16	Label 193	TEM_L3_2_EM_slices1to325 52	278
Label 16	Label 193	TEM_L3_2_EM_slices1to325 53	322
Label 16	Label 193	TEM_L3_2_EM_slices1to325 54	323
Label 16	Label 193	TEM_L3_2_EM_slices1to325 55	339
Label 16	Label 193	TEM_L3_2_EM_slices1to325 56	404
Label 16	Label 193	TEM_L3_2_EM_slices1to325 57	413
Label 16	Label 193	TEM_L3_2_EM_slices1to325 58	445
Label 16	Label 193	TEM_L3_2_EM_slices1to325 58	96
Label 16	Label 193	TEM_L3_2_EM_slices1to325 59	485
Label 16	Label 193	TEM_L3_2_EM_slices1to325 59	182
Label 16	Label 193	TEM_L3_2_EM_slices1to325 60	468
Label 16	Label 193	TEM_L3_2_EM_slices1to325 60	218
Label 16	Label 193	TEM_L3_2_EM_slices1to325 61	464
Label 16	Label 193	TEM_L3_2_EM_slices1to325 61	273
Label 16	Label 193	TEM_L3_2_EM_slices1to325 62	464
Label 16	Label 193	TEM_L3_2_EM_slices1to325 62	347
Label 16	Label 193	TEM_L3_2_EM_slices1to325 63	449
Label 16	Label 193	TEM_L3_2_EM_slices1to325 63	366
Label 16	Label 193	TEM_L3_2_EM_slices1to325 64	447
Label 16	Label 193	TEM_L3_2_EM_slices1to325 64	411
Label 16	Label 193	TEM_L3_2_EM_slices1to325 65	430
Label 16	Label 193	TEM_L3_2_EM_slices1to325 65	429
Label 16	Label 193	TEM_L3_2_EM_slices1to325 66	459
Label 16	Label 193	TEM_L3_2_EM_slices1to325 66	374
Label 16	Label 193	TEM_L3_2_EM_slices1to325 67	415
Label 16	Label 193	TEM_L3_2_EM_slices1to325 67	311
Label 16	Label 193	TEM_L3_2_EM_slices1to325 68	259
Label 16	Label 193	TEM_L3_2_EM_slices1to325 68	140
Label 16	Label 193	TEM_L3_2_EM_slices1to325 68	42
Label 16	Label 193	TEM_L3_2_EM_slices1to325 68	7
Label 16	Label 193	TEM_L3_2_EM_slices1to325 69	149
Label 16	Label 193	TEM_L3_2_EM_slices1to325 69	64
Label 16	Label 193	TEM_L3_2_EM_slices1to325 69	31
Label 16	Label 193	TEM_L3_2_EM_slices1to325 70	120
Label 16	Label 193	TEM_L3_2_EM_slices1to325 70	95
Label 16	Label 193	TEM_L3_2_EM_slices1to325 71	108
Label 16	Label 193	TEM_L3_2_EM_slices1to325 71	74
Label 16	Label 193	TEM_L3_2_EM_slices1to325 72	135
Label 16	Label 193	TEM_L3_2_EM_slices1to325 72	97
Label 16	Label 193	TEM_L3_2_EM_slices1to325 73	105
Label 16	Label 193	TEM_L3_2_EM_slices1to325 73	80
Label 16	Label 193	TEM_L3_2_EM_slices1to325 73	15
Label 16	Label 193	TEM_L3_2_EM_slices1to325 74	107
Label 16	Label 193	TEM_L3_2_EM_slices1to325 74	78
Label 16	Label 193	TEM_L3_2_EM_slices1to325 74	33
Label 16	Label 193	TEM_L3_2_EM_slices1to325 75	72
Label 16	Label 193	TEM_L3_2_EM_slices1to325 75	65
Label 16	Label 193	TEM_L3_2_EM_slices1to325 75	41
Label 16	Label 193	TEM_L3_2_EM_slices1to325 76	68
Label 16	Label 193	TEM_L3_2_EM_slices1to325 76	36
Label 16	Label 193	TEM_L3_2_EM_slices1to325 76	28
Label 16	Label 193	TEM_L3_2_EM_slices1to325 77	34
Label 16	Label 193	TEM_L3_2_EM_slices1to325 78	55
Label 16	Label 193	TEM_L3_2_EM_slices1to325 79	67
Label 16	Label 193	TEM_L3_2_EM_slices1to325 80	86
Label 16	Label 193	TEM_L3_2_EM_slices1to325 81	109
Label 16	Label 193	TEM_L3_2_EM_slices1to325 82	114
Label 16	Label 193	TEM_L3_2_EM_slices1to325 83	111
Label 16	Label 193	TEM_L3_2_EM_slices1to325 84	114
Label 16	Label 193	TEM_L3_2_EM_slices1to325 86	56
Label 16	Label 193	TEM_L3_2_EM_slices1to325 89	2
Label 16	Label 193	TEM_L3_2_EM_slices1to325 95	25
Label 16	Label 193	TEM_L3_2_EM_slices1to325 96	60
Label 16	Label 193	TEM_L3_2_EM_slices1to325 97	55
Label 16	Label 193	TEM_L3_2_EM_slices1to325 99	2
Label 16	Label 193	TEM_L3_2_EM_slices1to325 101	14
Label 16	Label 193	TEM_L3_2_EM_slices1to325 102	12
Label 16	Label 193	TEM_L3_2_EM_slices1to325 103	69
Label 16	Label 193	TEM_L3_2_EM_slices1to325 104	106
Label 16	Label 193	TEM_L3_2_EM_slices1to325 105	146
Label 16	Label 193	TEM_L3_2_EM_slices1to325 106	355
Label 16	Label 193	TEM_L3_2_EM_slices1to325 109	70
Label 16	Label 193	TEM_L3_2_EM_slices1to325 113	17
Label 16	Label 193	TEM_L3_2_EM_slices1to325 114	30
Label 16	Label 193	TEM_L3_2_EM_slices1to325 115	68
Label 16	Label 193	TEM_L3_2_EM_slices1to325 116	143
Label 16	Label 193	TEM_L3_2_EM_slices1to325 117	179
Label 16	Label 193	TEM_L3_2_EM_slices1to325 121	49
Label 16	Label 193	TEM_L3_2_EM_slices1to325 122	97
Label 16	Label 193	TEM_L3_2_EM_slices1to325 123	142
Label 16	Label 193	TEM_L3_2_EM_slices1to325 124	131
Label 16	Label 193	TEM_L3_2_EM_slices1to325 124	21
Label 16	Label 193	TEM_L3_2_EM_slices1to325 125	203
Label 16	Label 193	TEM_L3_2_EM_slices1to325 126	326
Label 16	Label 193	TEM_L3_2_EM_slices1to325 127	409
Label 16	Label 193	TEM_L3_2_EM_slices1to325 127	207
Label 16	Label 193	TEM_L3_2_EM_slices1to325 128	392
Label 16	Label 193	TEM_L3_2_EM_slices1to325 128	206
Label 16	Label 193	TEM_L3_2_EM_slices1to325 129	393
Label 16	Label 193	TEM_L3_2_EM_slices1to325 129	204
Label 16	Label 193	TEM_L3_2_EM_slices1to325 129	67
Label 16	Label 193	TEM_L3_2_EM_slices1to325 130	380
Label 16	Label 193	TEM_L3_2_EM_slices1to325 130	190
Label 16	Label 193	TEM_L3_2_EM_slices1to325 130	105
Label 16	Label 193	TEM_L3_2_EM_slices1to325 131	376
Label 16	Label 193	TEM_L3_2_EM_slices1to325 131	169
Label 16	Label 193	TEM_L3_2_EM_slices1to325 131	121
Label 16	Label 193	TEM_L3_2_EM_slices1to325 132	393
Label 16	Label 193	TEM_L3_2_EM_slices1to325 132	177
Label 16	Label 193	TEM_L3_2_EM_slices1to325 132	124
Label 16	Label 193	TEM_L3_2_EM_slices1to325 133	407
Label 16	Label 193	TEM_L3_2_EM_slices1to325 133	149
Label 16	Label 193	TEM_L3_2_EM_slices1to325 133	113
Label 16	Label 193	TEM_L3_2_EM_slices1to325 134	410
Label 16	Label 193	TEM_L3_2_EM_slices1to325 134	110
Label 16	Label 193	TEM_L3_2_EM_slices1to325 134	106
Label 16	Label 193	TEM_L3_2_EM_slices1to325 135	404
Label 16	Label 193	TEM_L3_2_EM_slices1to325 135	125
Label 16	Label 193	TEM_L3_2_EM_slices1to325 135	83
Label 16	Label 193	TEM_L3_2_EM_slices1to325 136	415
Label 16	Label 193	TEM_L3_2_EM_slices1to325 136	268
Label 16	Label 193	TEM_L3_2_EM_slices1to325 137	412
Label 16	Label 193	TEM_L3_2_EM_slices1to325 137	169
Label 16	Label 193	TEM_L3_2_EM_slices1to325 138	453
Label 16	Label 193	TEM_L3_2_EM_slices1to325 138	97
Label 16	Label 193	TEM_L3_2_EM_slices1to325 139	421
Label 16	Label 193	TEM_L3_2_EM_slices1to325 139	38
Label 16	Label 193	TEM_L3_2_EM_slices1to325 140	460
Label 16	Label 193	TEM_L3_2_EM_slices1to325 141	443
Label 16	Label 193	TEM_L3_2_EM_slices1to325 142	269
Label 16	Label 193	TEM_L3_2_EM_slices1to325 142	76
Label 16	Label 193	TEM_L3_2_EM_slices1to325 143	152
Label 16	Label 193	TEM_L3_2_EM_slices1to325 143	131
Label 16	Label 193	TEM_L3_2_EM_slices1to325 144	195
Label 16	Label 193	TEM_L3_2_EM_slices1to325 144	152
Label 16	Label 193	TEM_L3_2_EM_slices1to325 145	201
Label 16	Label 193	TEM_L3_2_EM_slices1to325 145	84
Label 16	Label 193	TEM_L3_2_EM_slices1to325 146	200
Label 16	Label 193	TEM_L3_2_EM_slices1to325 147	188
Label 16	Label 193	TEM_L3_2_EM_slices1to325 148	200
Label 16	Label 193	TEM_L3_2_EM_slices1to325 149	189
Label 16	Label 193	TEM_L3_2_EM_slices1to325 150	218
Label 16	Label 193	TEM_L3_2_EM_slices1to325 151	164
Label 16	Label 193	TEM_L3_2_EM_slices1to325 152	169
Label 16	Label 193	TEM_L3_2_EM_slices1to325 153	160
Label 16	Label 193	TEM_L3_2_EM_slices1to325 154	158
Label 16	Label 193	TEM_L3_2_EM_slices1to325 155	134
Label 16	Label 193	TEM_L3_2_EM_slices1to325 156	132
Label 16	Label 193	TEM_L3_2_EM_slices1to325 157	123
Label 16	Label 193	TEM_L3_2_EM_slices1to325 158	99
Label 16	Label 193	TEM_L3_2_EM_slices1to325 159	111
Label 16	Label 193	TEM_L3_2_EM_slices1to325 160	111
Label 16	Label 193	TEM_L3_2_EM_slices1to325 161	110
Label 16	Label 193	TEM_L3_2_EM_slices1to325 162	109
Label 16	Label 193	TEM_L3_2_EM_slices1to325 163	90
Label 16	Label 193	TEM_L3_2_EM_slices1to325 164	99
Label 16	Label 193	TEM_L3_2_EM_slices1to325 165	87
Label 16	Label 193	TEM_L3_2_EM_slices1to325 166	82
Label 16	Label 193	TEM_L3_2_EM_slices1to325 167	63
Label 16	Label 193	TEM_L3_2_EM_slices1to325 196	24
Label 16	Label 193	TEM_L3_2_EM_slices1to325 197	38
Label 16	Label 193	TEM_L3_2_EM_slices1to325 198	46
Label 16	Label 193	TEM_L3_2_EM_slices1to325 199	57
Label 16	Label 193	TEM_L3_2_EM_slices1to325 200	61
Label 16	Label 193	TEM_L3_2_EM_slices1to325 201	57
Label 16	Label 193	TEM_L3_2_EM_slices1to325 202	60
Label 16	Label 193	TEM_L3_2_EM_slices1to325 203	54
Label 16	Label 193	TEM_L3_2_EM_slices1to325 204	49
Label 16	Label 193	TEM_L3_2_EM_slices1to325 206	28
Label 16	Label 193	TEM_L3_2_EM_slices1to325 207	49
Label 16	Label 193	TEM_L3_2_EM_slices1to325 208	45
Label 16	Label 193	TEM_L3_2_EM_slices1to325 209	47
Label 16	Label 193	TEM_L3_2_EM_slices1to325 210	44
Label 16	Label 193	TEM_L3_2_EM_slices1to325 211	48
Label 16	Label 193	TEM_L3_2_EM_slices1to325 212	35
Label 16	Label 193	TEM_L3_2_EM_slices1to325 213	43
Label 16	Label 193	TEM_L3_2_EM_slices1to325 214	34
Label 16	Label 193	TEM_L3_2_EM_slices1to325 215	31
Label 16	Label 193	TEM_L3_2_EM_slices1to325 224	6
Label 16	Label 193	TEM_L3_2_EM_slices1to325 225	8
Label 16	Label 194	TEM_L3_2_EM_slices1to325 62	164
Label 16	Label 194	TEM_L3_2_EM_slices1to325 63	419
Label 16	Label 194	TEM_L3_2_EM_slices1to325 64	510
Label 16	Label 194	TEM_L3_2_EM_slices1to325 65	492
Label 16	Label 194	TEM_L3_2_EM_slices1to325 66	521
Label 16	Label 194	TEM_L3_2_EM_slices1to325 67	539
Label 16	Label 194	TEM_L3_2_EM_slices1to325 68	357
Label 16	Label 194	TEM_L3_2_EM_slices1to325 68	50
Label 16	Label 194	TEM_L3_2_EM_slices1to325 69	312
Label 16	Label 194	TEM_L3_2_EM_slices1to325 69	8
Label 16	Label 194	TEM_L3_2_EM_slices1to325 70	397
Label 16	Label 194	TEM_L3_2_EM_slices1to325 71	176
Label 16	Label 194	TEM_L3_2_EM_slices1to325 71	115
Label 16	Label 194	TEM_L3_2_EM_slices1to325 72	93
Label 16	Label 194	TEM_L3_2_EM_slices1to325 72	76
Label 16	Label 194	TEM_L3_2_EM_slices1to325 73	67
Label 16	Label 194	TEM_L3_2_EM_slices1to325 74	72
Label 16	Label 194	TEM_L3_2_EM_slices1to325 75	64
Label 16	Label 194	TEM_L3_2_EM_slices1to325 76	50
Label 16	Label 194	TEM_L3_2_EM_slices1to325 77	21
Label 16	Label 194	TEM_L3_2_EM_slices1to325 78	16
Label 16	Label 194	TEM_L3_2_EM_slices1to325 139	64
Label 16	Label 194	TEM_L3_2_EM_slices1to325 140	71
Label 16	Label 194	TEM_L3_2_EM_slices1to325 141	84
Label 16	Label 194	TEM_L3_2_EM_slices1to325 142	104
Label 16	Label 194	TEM_L3_2_EM_slices1to325 143	113
Label 16	Label 194	TEM_L3_2_EM_slices1to325 144	128
Label 16	Label 194	TEM_L3_2_EM_slices1to325 145	131
Label 16	Label 194	TEM_L3_2_EM_slices1to325 146	149
Label 16	Label 194	TEM_L3_2_EM_slices1to325 147	143
Label 16	Label 194	TEM_L3_2_EM_slices1to325 148	166
Label 16	Label 194	TEM_L3_2_EM_slices1to325 149	193
Label 16	Label 194	TEM_L3_2_EM_slices1to325 150	199
Label 16	Label 194	TEM_L3_2_EM_slices1to325 151	208
Label 16	Label 194	TEM_L3_2_EM_slices1to325 152	256
Label 16	Label 194	TEM_L3_2_EM_slices1to325 153	280
Label 16	Label 194	TEM_L3_2_EM_slices1to325 154	338
Label 16	Label 194	TEM_L3_2_EM_slices1to325 155	322
Label 16	Label 194	TEM_L3_2_EM_slices1to325 156	308
Label 16	Label 194	TEM_L3_2_EM_slices1to325 157	294
Label 16	Label 194	TEM_L3_2_EM_slices1to325 158	283
Label 16	Label 194	TEM_L3_2_EM_slices1to325 159	287
Label 16	Label 194	TEM_L3_2_EM_slices1to325 160	271
Label 16	Label 194	TEM_L3_2_EM_slices1to325 161	278
Label 16	Label 194	TEM_L3_2_EM_slices1to325 162	257
Label 16	Label 194	TEM_L3_2_EM_slices1to325 163	244
Label 16	Label 194	TEM_L3_2_EM_slices1to325 164	247
Label 16	Label 194	TEM_L3_2_EM_slices1to325 165	228
Label 16	Label 194	TEM_L3_2_EM_slices1to325 166	205
Label 16	Label 194	TEM_L3_2_EM_slices1to325 167	210
Label 16	Label 194	TEM_L3_2_EM_slices1to325 168	197
Label 16	Label 194	TEM_L3_2_EM_slices1to325 169	184
Label 16	Label 194	TEM_L3_2_EM_slices1to325 170	179
Label 16	Label 194	TEM_L3_2_EM_slices1to325 171	166
Label 16	Label 194	TEM_L3_2_EM_slices1to325 172	158
Label 16	Label 194	TEM_L3_2_EM_slices1to325 173	148
Label 16	Label 194	TEM_L3_2_EM_slices1to325 174	121
Label 16	Label 194	TEM_L3_2_EM_slices1to325 175	94
Label 16	Label 194	TEM_L3_2_EM_slices1to325 176	79
Label 16	Label 194	TEM_L3_2_EM_slices1to325 177	67
Label 16	Label 194	TEM_L3_2_EM_slices1to325 178	57
Label 16	Label 194	TEM_L3_2_EM_slices1to325 179	64
Label 16	Label 194	TEM_L3_2_EM_slices1to325 180	44
Label 16	Label 194	TEM_L3_2_EM_slices1to325 181	26
Label 16	Label 194	TEM_L3_2_EM_slices1to325 182	30
Label 16	Label 194	TEM_L3_2_EM_slices1to325 183	29
Label 16	Label 194	TEM_L3_2_EM_slices1to325 184	26
Label 16	Label 194	TEM_L3_2_EM_slices1to325 185	41
Label 16	Label 194	TEM_L3_2_EM_slices1to325 186	29
Label 16	Label 194	TEM_L3_2_EM_slices1to325 187	29
Label 16	Label 194	TEM_L3_2_EM_slices1to325 188	28
Label 16	Label 194	TEM_L3_2_EM_slices1to325 189	31
Label 16	Label 194	TEM_L3_2_EM_slices1to325 190	30
Label 16	Label 194	TEM_L3_2_EM_slices1to325 191	39
Label 16	Label 194	TEM_L3_2_EM_slices1to325 192	46
Label 16	Label 194	TEM_L3_2_EM_slices1to325 193	42
Label 16	Label 194	TEM_L3_2_EM_slices1to325 194	47
Label 16	Label 194	TEM_L3_2_EM_slices1to325 195	60
Label 16	Label 194	TEM_L3_2_EM_slices1to325 196	64
Label 16	Label 194	TEM_L3_2_EM_slices1to325 197	70
Label 16	Label 194	TEM_L3_2_EM_slices1to325 198	66
Label 16	Label 194	TEM_L3_2_EM_slices1to325 199	71
Label 16	Label 194	TEM_L3_2_EM_slices1to325 200	60
Label 16	Label 194	TEM_L3_2_EM_slices1to325 201	57
Label 16	Label 194	TEM_L3_2_EM_slices1to325 202	48
Label 16	Label 194	TEM_L3_2_EM_slices1to325 203	33
Label 16	Label 194	TEM_L3_2_EM_slices1to325 204	14
Label 16	Label 195	TEM_L3_2_EM_slices1to325 55	184
Label 16	Label 195	TEM_L3_2_EM_slices1to325 56	272
Label 16	Label 195	TEM_L3_2_EM_slices1to325 57	372
Label 16	Label 195	TEM_L3_2_EM_slices1to325 58	536
Label 16	Label 195	TEM_L3_2_EM_slices1to325 59	783
Label 16	Label 195	TEM_L3_2_EM_slices1to325 60	833
Label 16	Label 195	TEM_L3_2_EM_slices1to325 61	781
Label 16	Label 195	TEM_L3_2_EM_slices1to325 62	666
Label 16	Label 195	TEM_L3_2_EM_slices1to325 63	527
Label 16	Label 195	TEM_L3_2_EM_slices1to325 64	526
Label 16	Label 195	TEM_L3_2_EM_slices1to325 65	470
Label 16	Label 195	TEM_L3_2_EM_slices1to325 66	441
Label 16	Label 195	TEM_L3_2_EM_slices1to325 67	420
Label 16	Label 195	TEM_L3_2_EM_slices1to325 68	381
Label 16	Label 195	TEM_L3_2_EM_slices1to325 69	268
Label 16	Label 195	TEM_L3_2_EM_slices1to325 69	26
Label 16	Label 195	TEM_L3_2_EM_slices1to325 70	188
Label 16	Label 195	TEM_L3_2_EM_slices1to325 70	91
Label 16	Label 195	TEM_L3_2_EM_slices1to325 71	166
Label 16	Label 195	TEM_L3_2_EM_slices1to325 72	50
Label 16	Label 195	TEM_L3_2_EM_slices1to325 126	140
Label 16	Label 195	TEM_L3_2_EM_slices1to325 127	192
Label 16	Label 195	TEM_L3_2_EM_slices1to325 128	228
Label 16	Label 195	TEM_L3_2_EM_slices1to325 129	236
Label 16	Label 195	TEM_L3_2_EM_slices1to325 130	227
Label 16	Label 195	TEM_L3_2_EM_slices1to325 131	258
Label 16	Label 195	TEM_L3_2_EM_slices1to325 132	252
Label 16	Label 195	TEM_L3_2_EM_slices1to325 133	260
Label 16	Label 195	TEM_L3_2_EM_slices1to325 134	257
Label 16	Label 195	TEM_L3_2_EM_slices1to325 135	177
Label 16	Label 195	TEM_L3_2_EM_slices1to325 136	191
Label 16	Label 195	TEM_L3_2_EM_slices1to325 137	225
Label 16	Label 195	TEM_L3_2_EM_slices1to325 138	213
Label 16	Label 195	TEM_L3_2_EM_slices1to325 139	225
Label 16	Label 195	TEM_L3_2_EM_slices1to325 140	190
Label 16	Label 195	TEM_L3_2_EM_slices1to325 141	200
Label 16	Label 195	TEM_L3_2_EM_slices1to325 142	206
Label 16	Label 195	TEM_L3_2_EM_slices1to325 143	191
Label 16	Label 195	TEM_L3_2_EM_slices1to325 144	154
Label 16	Label 195	TEM_L3_2_EM_slices1to325 145	166
Label 16	Label 195	TEM_L3_2_EM_slices1to325 146	197
Label 16	Label 195	TEM_L3_2_EM_slices1to325 147	143
Label 16	Label 195	TEM_L3_2_EM_slices1to325 148	104
Label 16	Label 195	TEM_L3_2_EM_slices1to325 149	57
Label 16	Label 195	TEM_L3_2_EM_slices1to325 150	50
Label 16	Label 195	TEM_L3_2_EM_slices1to325 151	41
Label 16	Label 195	TEM_L3_2_EM_slices1to325 152	23
Label 16	Label 195	TEM_L3_2_EM_slices1to325 153	34
Label 16	Label 196	TEM_L3_2_EM_slices1to325 132	70
Label 16	Label 196	TEM_L3_2_EM_slices1to325 133	90
Label 16	Label 196	TEM_L3_2_EM_slices1to325 134	63
Label 16	Label 196	TEM_L3_2_EM_slices1to325 135	9
Label 16	Label 196	TEM_L3_2_EM_slices1to325 136	32
Label 16	Label 196	TEM_L3_2_EM_slices1to325 137	56
Label 16	Label 196	TEM_L3_2_EM_slices1to325 138	88
Label 16	Label 196	TEM_L3_2_EM_slices1to325 139	116
Label 16	Label 196	TEM_L3_2_EM_slices1to325 140	132
Label 16	Label 196	TEM_L3_2_EM_slices1to325 141	122
Label 16	Label 196	TEM_L3_2_EM_slices1to325 142	72
Label 16	Label 201	TEM_L3_2_EM_slices1to325 143	1
Label 16	Label 201	TEM_L3_2_EM_slices1to325 144	6
Label 16	Label 201	TEM_L3_2_EM_slices1to325 145	4
Label 16	Label 201	TEM_L3_2_EM_slices1to325 148	66
Label 16	Label 211	TEM_L3_2_EM_slices1to325 116	120
Label 16	Label 211	TEM_L3_2_EM_slices1to325 117	135
Label 16	Label 211	TEM_L3_2_EM_slices1to325 118	120
Label 16	Label 211	TEM_L3_2_EM_slices1to325 119	135
Label 16	Label 211	TEM_L3_2_EM_slices1to325 120	144
Label 16	Label 211	TEM_L3_2_EM_slices1to325 121	144
Label 16	Label 211	TEM_L3_2_EM_slices1to325 122	181
Label 16	Label 211	TEM_L3_2_EM_slices1to325 123	155
Label 16	Label 211	TEM_L3_2_EM_slices1to325 124	239
Label 16	Label 211	TEM_L3_2_EM_slices1to325 125	308
Label 16	Label 211	TEM_L3_2_EM_slices1to325 126	339
Label 16	Label 211	TEM_L3_2_EM_slices1to325 127	363
Label 16	Label 211	TEM_L3_2_EM_slices1to325 128	382
Label 16	Label 211	TEM_L3_2_EM_slices1to325 129	394
Label 16	Label 211	TEM_L3_2_EM_slices1to325 130	384
Label 16	Label 211	TEM_L3_2_EM_slices1to325 131	393
Label 16	Label 211	TEM_L3_2_EM_slices1to325 135	343
Label 16	Label 211	TEM_L3_2_EM_slices1to325 136	337
Label 16	Label 211	TEM_L3_2_EM_slices1to325 138	290
Label 16	Label 211	TEM_L3_2_EM_slices1to325 139	301
Label 16	Label 211	TEM_L3_2_EM_slices1to325 140	224
Label 16	Label 211	TEM_L3_2_EM_slices1to325 141	195
Label 16	Label 211	TEM_L3_2_EM_slices1to325 142	171
Label 16	Label 211	TEM_L3_2_EM_slices1to325 142	20
Label 16	Label 211	TEM_L3_2_EM_slices1to325 143	128
Label 16	Label 211	TEM_L3_2_EM_slices1to325 144	109
Label 16	Label 211	TEM_L3_2_EM_slices1to325 145	83
Label 16	Label 213	TEM_L3_2_EM_slices1to325 88	20
Label 16	Label 213	TEM_L3_2_EM_slices1to325 89	52
Label 16	Label 213	TEM_L3_2_EM_slices1to325 90	12
Label 16	Label 213	TEM_L3_2_EM_slices1to325 123	43
Label 16	Label 213	TEM_L3_2_EM_slices1to325 124	73
Label 16	Label 213	TEM_L3_2_EM_slices1to325 125	70
Label 16	Label 213	TEM_L3_2_EM_slices1to325 126	101
Label 16	Label 213	TEM_L3_2_EM_slices1to325 127	90
Label 16	Label 213	TEM_L3_2_EM_slices1to325 128	101
Label 16	Label 213	TEM_L3_2_EM_slices1to325 129	88
Label 16	Label 213	TEM_L3_2_EM_slices1to325 130	78
Label 16	Label 213	TEM_L3_2_EM_slices1to325 131	85
Label 16	Label 213	TEM_L3_2_EM_slices1to325 132	81
Label 16	Label 213	TEM_L3_2_EM_slices1to325 133	83
Label 16	Label 213	TEM_L3_2_EM_slices1to325 134	76
Label 16	Label 213	TEM_L3_2_EM_slices1to325 135	85
Label 16	Label 213	TEM_L3_2_EM_slices1to325 136	92
Label 16	Label 213	TEM_L3_2_EM_slices1to325 137	79
Label 16	Label 213	TEM_L3_2_EM_slices1to325 138	79
Label 16	Label 213	TEM_L3_2_EM_slices1to325 139	30
Label 16	Label 213	TEM_L3_2_EM_slices1to325 179	12
Label 16	Label 213	TEM_L3_2_EM_slices1to325 180	16
Label 16	Label 213	TEM_L3_2_EM_slices1to325 181	23
Label 16	Label 213	TEM_L3_2_EM_slices1to325 182	34
Label 16	Label 213	TEM_L3_2_EM_slices1to325 183	45
Label 16	Label 213	TEM_L3_2_EM_slices1to325 184	36
Label 16	Label 213	TEM_L3_2_EM_slices1to325 185	52
Label 16	Label 213	TEM_L3_2_EM_slices1to325 186	48
Label 16	Label 213	TEM_L3_2_EM_slices1to325 187	46
Label 16	Label 213	TEM_L3_2_EM_slices1to325 188	35
Label 16	Label 213	TEM_L3_2_EM_slices1to325 189	47
Label 16	Label 213	TEM_L3_2_EM_slices1to325 190	49
Label 16	Label 213	TEM_L3_2_EM_slices1to325 191	51
Label 16	Label 213	TEM_L3_2_EM_slices1to325 192	51
Label 16	Label 213	TEM_L3_2_EM_slices1to325 193	47
Label 16	Label 213	TEM_L3_2_EM_slices1to325 194	56
Label 16	Label 213	TEM_L3_2_EM_slices1to325 195	45
Label 16	Label 213	TEM_L3_2_EM_slices1to325 196	48
Label 16	Label 213	TEM_L3_2_EM_slices1to325 197	51
Label 16	Label 213	TEM_L3_2_EM_slices1to325 198	38
Label 16	Label 213	TEM_L3_2_EM_slices1to325 199	49
Label 16	Label 213	TEM_L3_2_EM_slices1to325 200	40
Label 16	Label 213	TEM_L3_2_EM_slices1to325 201	51
Label 16	Label 213	TEM_L3_2_EM_slices1to325 202	38
Label 16	Label 213	TEM_L3_2_EM_slices1to325 203	45
Label 16	Label 213	TEM_L3_2_EM_slices1to325 204	35
Label 16	Label 213	TEM_L3_2_EM_slices1to325 205	45
Label 16	Label 213	TEM_L3_2_EM_slices1to325 206	50
Label 16	Label 213	TEM_L3_2_EM_slices1to325 207	55
Label 16	Label 213	TEM_L3_2_EM_slices1to325 208	57
Label 16	Label 213	TEM_L3_2_EM_slices1to325 209	62
Label 16	Label 213	TEM_L3_2_EM_slices1to325 210	66
Label 16	Label 213	TEM_L3_2_EM_slices1to325 211	60
Label 16	Label 213	TEM_L3_2_EM_slices1to325 212	56
Label 16	Label 213	TEM_L3_2_EM_slices1to325 213	56
Label 16	Label 213	TEM_L3_2_EM_slices1to325 214	57
Label 16	Label 213	TEM_L3_2_EM_slices1to325 215	53
Label 16	Label 213	TEM_L3_2_EM_slices1to325 216	53
Label 16	Label 213	TEM_L3_2_EM_slices1to325 217	58
Label 16	Label 213	TEM_L3_2_EM_slices1to325 218	58
Label 16	Label 213	TEM_L3_2_EM_slices1to325 219	82
Label 16	Label 213	TEM_L3_2_EM_slices1to325 220	84
Label 16	Label 213	TEM_L3_2_EM_slices1to325 221	105
Label 16	Label 213	TEM_L3_2_EM_slices1to325 222	93
Label 16	Label 213	TEM_L3_2_EM_slices1to325 223	78
Label 16	Label 213	TEM_L3_2_EM_slices1to325 224	52
Label 16	Label 213	TEM_L3_2_EM_slices1to325 225	69
Label 16	Label 213	TEM_L3_2_EM_slices1to325 226	16
Label 16	Label 213	TEM_L3_2_EM_slices1to325 227	61
Label 16	Label 213	TEM_L3_2_EM_slices1to325 228	64
Label 16	Label 213	TEM_L3_2_EM_slices1to325 229	48
Label 17	Label 15	TEM_L3_2_EM_slices1to325 157	12
Label 17	Label 15	TEM_L3_2_EM_slices1to325 158	12
Label 17	Label 15	TEM_L3_2_EM_slices1to325 159	14
Label 17	Label 15	TEM_L3_2_EM_slices1to325 160	15
Label 17	Label 15	TEM_L3_2_EM_slices1to325 161	10
[truncated: 90,558 more rows]
