# Supplementary material for: Exploring neurodevelopment via spatiotemporal collation of anatomical networks with NeuroSC
Source: eLife. 2025 Oct 21;13:RP103977. doi: 10.7554/eLife.103977 (PMC12539806; doi:10.7554/eLife.103977)
Supplement: Supplementary file 12. — Type the name of a ‘Neuron of Interest’ (NOI) in the indicated cell to filter for the summed adjacency counts for each contact partner. For each partner, there are two columns: Total number of contacts (number of EM sections NOI and partner are in contact) and Total Weights (summed number of pixels NOI and partner contacts). [file elife-103977-supp12.xlsx]

## Sheet: 2018_10_24_Adjacency_JSH_NCB_or
Neuron 1	Neuron 2	Section	Weight				Partner	# of contacts	Total Weights			Partner	# of contacts for XXX-L	Total Weights for XXX-L	# of contacts for XXX-R	Total Weights for XXX-R
RMDVL	IL1DL	JSH001	1836		Write your NOI here		ADAL	0	0	Write your NOI here		ADAL	0	0	0	0
URYDL	RMDVL	JSH001	1401				ADAR	0	0			ADAR	0	0	0	0
OLLL	RMDVL	JSH001	1042				ADEL	0	0			ADEL	0	0	0	0
URYDL	RMDDR	JSH001	920				ADER	0	0			ADER	0	0	0	0
RMDDL	RMDDR	JSH001	790				ADFL	0	0	Write your NOI hereL		ADFL	0	0	0	0
URYDL	RMED	JSH001	788				ADFR	0	0	Write your NOI hereR		ADFR	0	0	0	0
RIPL	URADL	JSH001	703				ADLL	0	0			ADLL	0	0	0	0
URYDR	RIH	JSH001	657				ADLR	0	0			ADLR	0	0	0	0
OLQDL	RIH	JSH001	589				AFDL	0	0			AFDL	0	0	0	0
RIPL	IL1DL	JSH001	500				AFDR	0	0			AFDR	0	0	0	0
RMDVL	IL1DL	JSH001	487				AIAL	0	0			AIAL	0	0	0	0
RMDDL	URYDR	JSH001	440				AIAR	0	0			AIAR	0	0	0	0
OLLL	IL1DL	JSH001	436				AIBL	0	0			AIBL	0	0	0	0
IL2L	RMEV	JSH001	425				AIBR	0	0			AIBR	0	0	0	0
IL2L	OLQDL	JSH001	418				AIML	0	0			AIML	0	0	0	0
OLLL	OLQDL	JSH001	399				AIMR	0	0			AIMR	0	0	0	0
RIPL	RIH	JSH001	377				AINL	0	0			AINL	0	0	0	0
RMED	IL1R	JSH001	317				AINR	0	0			AINR	0	0	0	0
RIBL	OLQDL	JSH001	308				AIYL	0	0			AIYL	0	0	0	0
URYDL	IL1DL	JSH001	289				AIYR	0	0			AIYR	0	0	0	0
IL2DR	RIH	JSH001	279				AIZL	0	0			AIZL	0	0	0	0
RIPL	IL2DL	JSH001	275				AIZR	0	0			AIZR	0	0	0	0
RIBL	URYDL	JSH001	264				ALA	0	0			ALA	0	0	0	0
IL1R	URYDR	JSH001	258				ALML	0	0			ALML	0	0	0	0
RMEV	RMED	JSH001	257				ALMR	0	0			ALMR	0	0	0	0
URXL	URYDL	JSH001	240				ALNL	0	0			ALNL	0	0	0	0
RMER	URADR	JSH001	235				ALNR	0	0			ALNR	0	0	0	0
RMER	IL2DR	JSH001	230				AQR	0	0			AQR	0	0	0	0
URYDL	CEPDL	JSH001	226				ASEL	0	0			ASEL	0	0	0	0
IL1DL	OLQDL	JSH001	222				ASER	0	0			ASER	0	0	0	0
RMEV	RMDDR	JSH001	218				ASGL	0	0			ASGL	0	0	0	0
RMED	RIH	JSH001	210				ASGR	0	0			ASGR	0	0	0	0
RIH	URXR	JSH001	201				ASHL	0	0			ASHL	0	0	0	0
RMEV	IL1R	JSH001	198				ASHR	0	0			ASHR	0	0	0	0
CEPDR	RIH	JSH001	195				ASIL	0	0			ASIL	0	0	0	0
IL1DL	IL2DL	JSH001	191				ASIR	0	0			ASIR	0	0	0	0
CEPDL	IL2DL	JSH001	191				ASJL	0	0			ASJL	0	0	0	0
RMDVL	RMDDR	JSH001	190				ASJR	0	0			ASJR	0	0	0	0
RMEV	URADR	JSH001	189				ASKL	0	0			ASKL	0	0	0	0
URYDL	RMEV	JSH001	182				ASKR	0	0			ASKR	0	0	0	0
URYDL	OLQDL	JSH001	178				AUAL	0	0			AUAL	0	0	0	0
URXL	CEPDL	JSH001	175				AUAR	0	0			AUAR	0	0	0	0
RMER	RMEV	JSH001	174				AVAL	0	0			AVAL	0	0	0	0
URYDL	IL2DL	JSH001	172				AVAR	0	0			AVAR	0	0	0	0
RMEV	RMDDL	JSH001	167				AVBL	0	0			AVBL	0	0	0	0
URYDL	RMDVL	JSH001	154				AVBR	0	0			AVBR	0	0	0	0
RMEV	IL1DL	JSH001	150				AVDL	0	0			AVDL	0	0	0	0
URBL	IL2L	JSH001	145				AVDR	0	0			AVDR	0	0	0	0
URYDL	IL1DL	JSH001	140				AVEL	0	0			AVEL	0	0	0	0
RMED	IL1DL	JSH001	136				AVER	0	0			AVER	0	0	0	0
OLQDL	IL2DL	JSH001	135				AVFL	0	0			AVFL	0	0	0	0
URYDL	OLQDL	JSH001	132				AVFR	0	0			AVFR	0	0	0	0
IL2DR	RMED	JSH001	130				AVHL	0	0			AVHL	0	0	0	0
URADR	RMEL	JSH001	127				AVHR	0	0			AVHR	0	0	0	0
RMED	URYDR	JSH001	126				AVJL	0	0			AVJL	0	0	0	0
IL2DR	RMEL	JSH001	122				AVJR	0	0			AVJR	0	0	0	0
RMER	RMEL	JSH001	120				AVKL	0	0			AVKL	0	0	0	0
URBL	OLLL	JSH001	119				AVKR	0	0			AVKR	0	0	0	0
IL2DR	IL1R	JSH001	111				AVL	0	0			AVL	0	0	0	0
RMEV	RMDDR	JSH001	90				AVM	0	0			AVM	0	0	0	0
CEPDL	URADL	JSH001	89				AWAL	0	0			AWAL	0	0	0	0
IL1DL	URADL	JSH001	86				AWAR	0	0			AWAR	0	0	0	0
URADR	IL1DR	JSH001	84				AWBL	0	0			AWBL	0	0	0	0
IL2L	IL1L	JSH001	78				AWBR	0	0			AWBR	0	0	0	0
IL1DL	URADL	JSH001	61				AWCL	0	0			AWCL	0	0	0	0
CEPDR	IL2DR	JSH001	59				AWCR	0	0			AWCR	0	0	0	0
IL2L	RIH	JSH001	58				BAGL	0	0			BAGL	0	0	0	0
CEPDR	URXR	JSH001	57				BAGR	0	0			BAGR	0	0	0	0
IL1VR	IL2VR	JSH001	56				BDUL	0	0			BDUL	0	0	0	0
URADR	URYDR	JSH001	55				BDUR	0	0			BDUR	0	0	0	0
IL2DR	URADR	JSH001	47				CEPDL	0	0			CEPDL	0	0	0	0
IL2DR	IL1DR	JSH001	45				CEPDR	0	0			CEPDR	0	0	0	0
IL1DL	IL2DL	JSH001	45				CEPVL	0	0			CEPVL	0	0	0	0
RMDVL	OLQDL	JSH001	42				CEPVR	0	0			CEPVR	0	0	0	0
IL2VL	CEPVL	JSH001	35				DVA	0	0			DVA	0	0	0	0
URYDL	IL1DL	JSH001	34				DVC	0	0			DVC	0	0	0	0
IL1DL	OLQDL	JSH001	27				FLPL	0	0			FLPL	0	0	0	0
URYDL	OLQDL	JSH001	22				FLPR	0	0			FLPR	0	0	0	0
URADL	IL2DL	JSH001	18				HSNR	0	0			HSNR	0	0	0	0
URADR	URYDR	JSH001	18				IL1DL	0	0			IL1DL	0	0	0	0
RMER	IL1R	JSH001	16				IL1DR	0	0			IL1DR	0	0	0	0
RMED	IL1DL	JSH001	8				IL1L	0	0			IL1L	0	0	0	0
RMDVL	IL1DL	JSH002	2062				IL1R	0	0			IL1R	0	0	0	0
OLLL	RMDVL	JSH002	1418				IL1VL	0	0			IL1VL	0	0	0	0
URYDL	RMDDR	JSH002	1065				IL1VR	0	0			IL1VR	0	0	0	0
RIPL	URADL	JSH002	952				IL2DL	0	0			IL2DL	0	0	0	0
RMDDL	URYDR	JSH002	870				IL2DR	0	0			IL2DR	0	0	0	0
URYDL	RMDVL	JSH002	842				IL2L	0	0			IL2L	0	0	0	0
OLLL	RMDVL	JSH002	716				IL2R	0	0			IL2R	0	0	0	0
RMDDL	RMDDR	JSH002	695				IL2VL	0	0			IL2VL	0	0	0	0
URYDL	RMED	JSH002	690				IL2VR	0	0			IL2VR	0	0	0	0
URYDR	RIH	JSH002	612				OLLL	0	0			OLLL	0	0	0	0
RIPL	IL1DL	JSH002	579				OLLR	0	0			OLLR	0	0	0	0
OLLL	IL1DL	JSH002	547				OLQDL	0	0			OLQDL	0	0	0	0
OLLL	OLQDL	JSH002	418				OLQDR	0	0			OLQDR	0	0	0	0
RMER	IL2DR	JSH002	403				OLQVL	0	0			OLQVL	0	0	0	0
RMEV	SMDVL	JSH002	390				OLQVR	0	0			OLQVR	0	0	0	0
RMDVL	RMDDR	JSH002	379				PLNL	0	0			PLNL	0	0	0	0
IL2L	RMEV	JSH002	378				PLNR	0	0			PLNR	0	0	0	0
OLQDL	RIH	JSH002	351				PVCL	0	0			PVCL	0	0	0	0
RIBL	OLQDL	JSH002	339				PVCR	0	0			PVCR	0	0	0	0
RIPL	RIH	JSH002	300				PVNL	0	0			PVNL	0	0	0	0
IL2DR	RMED	JSH002	285				PVPL	0	0			PVPL	0	0	0	0
URYDL	RMDVL	JSH002	280				PVPR	0	0			PVPR	0	0	0	0
RMED	IL1R	JSH002	280				PVQL	0	0			PVQL	0	0	0	0
RIPL	IL2DL	JSH002	270				PVQR	0	0			PVQR	0	0	0	0
RIBL	URYDL	JSH002	266				PVR	0	0			PVR	0	0	0	0
URYDL	OLLL	JSH002	264				PVT	0	0			PVT	0	0	0	0
URYDL	RMEV	JSH002	254				RIAL	0	0			RIAL	0	0	0	0
IL2L	OLQDL	JSH002	252				RIAR	0	0			RIAR	0	0	0	0
RMED	RIH	JSH002	242				RIBL	0	0			RIBL	0	0	0	0
URYDL	IL1DL	JSH002	240				RIBR	0	0			RIBR	0	0	0	0
RMEV	RMDDR	JSH002	235				RICL	0	0			RICL	0	0	0	0
CEPDR	RIH	JSH002	232				RICR	0	0			RICR	0	0	0	0
IL1DL	OLQDL	JSH002	229				RID	0	0			RID	0	0	0	0
OLLL	IL1DL	JSH002	218				RIFL	0	0			RIFL	0	0	0	0
RMDVL	IL1DL	JSH002	216				RIFR	0	0			RIFR	0	0	0	0
URXL	URYDL	JSH002	205				RIGL	0	0			RIGL	0	0	0	0
URYDL	CEPDL	JSH002	201				RIGR	0	0			RIGR	0	0	0	0
RMED	IL1L	JSH002	197				RIH	0	0			RIH	0	0	0	0
IL2L	RIH	JSH002	193				RIML	0	0			RIML	0	0	0	0
RMER	RMEV	JSH002	189				RIMR	0	0			RIMR	0	0	0	0
RIH	URXR	JSH002	188				RIPL	0	0			RIPL	0	0	0	0
URYDL	OLQDL	JSH002	173				RIPR	0	0			RIPR	0	0	0	0
RMER	RMEL	JSH002	172				RIR	0	0			RIR	0	0	0	0
RMEV	RMED	JSH002	170				RIS	0	0			RIS	0	0	0	0
URXL	CEPDL	JSH002	166				RIVL	0	0			RIVL	0	0	0	0
IL1DL	IL2DL	JSH002	166				RIVR	0	0			RIVR	0	0	0	0
RMEV	URADR	JSH002	166				RMDDL	0	0			RMDDL	0	0	0	0
IL1R	URYDR	JSH002	160				RMDDR	0	0			RMDDR	0	0	0	0
IL2DR	RIH	JSH002	159				RMDL	0	0			RMDL	0	0	0	0
RMEV	RMDDL	JSH002	158				RMDR	0	0			RMDR	0	0	0	0
RMER	URADR	JSH002	153				RMDVL	0	0			RMDVL	0	0	0	0
RMEV	RMDDR	JSH002	150				RMDVR	0	0			RMDVR	0	0	0	0
URADR	RMEL	JSH002	147				RMED	0	0			RMED	0	0	0	0
CEPDL	IL2DL	JSH002	146				RMEL	0	0			RMEL	0	0	0	0
OLQDL	IL2DL	JSH002	145				RMER	0	0			RMER	0	0	0	0
URYDL	IL2DL	JSH002	145				RMEV	0	0			RMEV	0	0	0	0
RMEV	IL1L	JSH002	139				RMFL	0	0			RMFL	0	0	0	0
URYDL	OLQDL	JSH002	137				RMFR	0	0			RMFR	0	0	0	0
URYDL	IL1DL	JSH002	135				RMGL	0	0			RMGL	0	0	0	0
RMEV	IL1DL	JSH002	132				RMGR	0	0			RMGR	0	0	0	0
URBL	IL2L	JSH002	127				RMHL	0	0			RMHL	0	0	0	0
RMEV	IL1R	JSH002	121				RMHR	0	0			RMHR	0	0	0	0
IL2DR	IL1R	JSH002	119				SAADL	0	0			SAADL	0	0	0	0
OLLR	IL2R	JSH002	119				SAADR	0	0			SAADR	0	0	0	0
RMEV	URYDR	JSH002	115				SAAVL	0	0			SAAVL	0	0	0	0
IL1DR	IL1DL	JSH002	111				SAAVR	0	0			SAAVR	0	0	0	0
RMED	URYDR	JSH002	110				SDQL	0	0			SDQL	0	0	0	0
URBL	OLLL	JSH002	108				SDQR	0	0			SDQR	0	0	0	0
URYDL	SMDVL	JSH002	99				SIADL	0	0			SIADL	0	0	0	0
IL2DR	RMEL	JSH002	97				SIADR	0	0			SIADR	0	0	0	0
IL2L	IL1L	JSH002	94				SIAVL	0	0			SIAVL	0	0	0	0
IL2VR	CEPVR	JSH002	89				SIAVR	0	0			SIAVR	0	0	0	0
CEPDR	URXR	JSH002	85				SIBDL	0	0			SIBDL	0	0	0	0
URADR	IL1DR	JSH002	82				SIBDR	0	0			SIBDR	0	0	0	0
RMEV	IL1DR	JSH002	74				SIBVL	0	0			SIBVL	0	0	0	0
RMED	IL1DL	JSH002	73				SIBVR	0	0			SIBVR	0	0	0	0
URYDL	OLQDL	JSH002	72				SMBDL	0	0			SMBDL	0	0	0	0
URYDL	IL1DL	JSH002	69				SMBDR	0	0			SMBDR	0	0	0	0
IL1VR	IL2VR	JSH002	68				SMBVL	0	0			SMBVL	0	0	0	0
CEPDL	URADL	JSH002	62				SMBVR	0	0			SMBVR	0	0	0	0
IL2DR	IL1DR	JSH002	62				SMDDL	0	0			SMDDL	0	0	0	0
IL2VL	CEPVL	JSH002	61				SMDDR	0	0			SMDDR	0	0	0	0
IL1DL	URADL	JSH002	59				SMDVL	0	0			SMDVL	0	0	0	0
IL2L	IL1L	JSH002	54				SMDVR	0	0			SMDVR	0	0	0	0
CEPDR	IL2DR	JSH002	51				URADL	0	0			URADL	0	0	0	0
IL1DL	IL2DL	JSH002	47				URADR	0	0			URADR	0	0	0	0
IL2DR	URADR	JSH002	40				URAVL	0	0			URAVL	0	0	0	0
RMEV	IL1DL	JSH002	34				URAVR	0	0			URAVR	0	0	0	0
URADL	IL2DL	JSH002	30				URBL	0	0			URBL	0	0	0	0
URADR	URYDR	JSH002	30				URBR	0	0			URBR	0	0	0	0
SMDVL	IL1DL	JSH002	30				URXL	0	0			URXL	0	0	0	0
IL1L	IL1DL	JSH002	30				URXR	0	0			URXR	0	0	0	0
RMER	IL1R	JSH002	26				URYDL	0	0			URYDL	0	0	0	0
URADR	URYDR	JSH002	26				URYDR	0	0			URYDR	0	0	0	0
URYDL	URADL	JSH002	24				URYVL	0	0			URYVL	0	0	0	0
IL1DL	OLQDL	JSH002	23				URYVR	0	0			URYVR	0	0	0	0
OLLL	RMDVL	JSH002	22
CEPDR	IL1DR	JSH002	4
IL1DL	RMDDR	JSH002	4
RMDVL	IL1DL	JSH003	1925
OLLL	RMDVL	JSH003	1530
URYDL	AVER	JSH003	1274
RMDDL	URYDR	JSH003	913
AVER	OLLL	JSH003	908
RIPL	URADL	JSH003	828
URYDR	RIH	JSH003	713
RMDDL	RMDDR	JSH003	668
RIPL	IL1DL	JSH003	656
URYDL	RMDDR	JSH003	612
URYDL	RMED	JSH003	585
OLLL	IL1DL	JSH003	418
URYDL	RMDVL	JSH003	345
RMDVL	RMDDR	JSH003	331
RIBL	OLQDL	JSH003	327
RMEV	IL2L	JSH003	317
OLLL	OLQDL	JSH003	315
IL1DL	OLQDL	JSH003	293
RMEV	RMDDR	JSH003	275
RIBL	URYDL	JSH003	274
RMED	RIH	JSH003	266
RMER	IL2DR	JSH003	260
IL2L	OLQDL	JSH003	259
CEPDR	RIH	JSH003	258
OLQDL	RIH	JSH003	249
IL1L	IL2L	JSH003	242
IL2DR	RMED	JSH003	232
RMEV	SMDVL	JSH003	226
IL1DL	IL2DL	JSH003	224
URYDL	CEPDL	JSH003	219
OLLL	IL1DL	JSH003	216
URXL	URYDL	JSH003	214
RMEV	URADR	JSH003	203
RIPL	IL2DL	JSH003	197
RIPL	RIH	JSH003	194
URYDL	IL1DL	JSH003	190
RMER	RMEL	JSH003	187
RMED	IL1R	JSH003	186
URXL	CEPDL	JSH003	181
RMDVL	IL1DL	JSH003	178
RIBL	AVER	JSH003	175
IL2DR	RMEL	JSH003	172
URBL	IL2L	JSH003	172
RMED	IL1L	JSH003	171
RMEV	RMDDR	JSH003	169
RIH	URXR	JSH003	161
RMEV	RMDDL	JSH003	154
IL2L	RIH	JSH003	153
RMER	URADR	JSH003	150
IL1R	URYDR	JSH003	149
CEPDL	IL2DL	JSH003	145
URYDL	IL2DL	JSH003	144
IL2DR	IL1R	JSH003	143
RMEV	IL1R	JSH003	140
RMEV	URYDR	JSH003	136
RMEV	IL1DL	JSH003	133
RMEV	RMED	JSH003	132
URYDL	IL1DL	JSH003	127
IL1L	IL1DL	JSH003	120
URYDL	OLQDL	JSH003	119
AVER	OLLL	JSH003	119
URBL	OLLL	JSH003	118
RMEV	IL1L	JSH003	118
OLQDL	IL2DL	JSH003	115
OLLR	IL2R	JSH003	113
CEPDR	URXR	JSH003	112
RMER	RMEV	JSH003	111
RMED	URYDR	JSH003	95
RMEV	IL1DR	JSH003	90
URADR	RMEL	JSH003	89
AVER	OLQDL	JSH003	82
IL2VR	CEPVR	JSH003	79
IL1DL	URADL	JSH003	73
IL2DR	RIH	JSH003	73
IL2DR	IL1DR	JSH003	62
URYDL	OLQDL	JSH003	61
IL1DR	IL1DL	JSH003	58
IL1DL	IL2DL	JSH003	56
CEPDR	IL2DR	JSH003	55
URYDL	IL1DL	JSH003	54
IL1DL	OLQDL	JSH003	51
CEPDL	URADL	JSH003	49
AVER	OLQDL	JSH003	49
URADR	IL1DR	JSH003	45
OLLL	RMDVL	JSH003	44
URADR	URYDR	JSH003	42
IL1L	IL2L	JSH003	34
URYDL	OLQDL	JSH003	33
SMDVL	IL1DL	JSH003	31
CEPDR	IL1DR	JSH003	30
URADL	IL2DL	JSH003	26
IL1VR	IL2VR	JSH003	23
IL2DR	URADR	JSH003	22
URYDL	URADL	JSH003	22
IL2DR	RMEV	JSH003	21
URADR	URYDR	JSH003	20
RMDVL	IL1DL	JSH004	1859
RMDVL	OLLL	JSH004	1844
URYDL	AVER	JSH004	1330
AVER	OLLL	JSH004	995
RIPL	URADL	JSH004	832
URYDR	RIH	JSH004	780
RIPL	IL1DL	JSH004	715
RMDDL	RMDDR	JSH004	586
OLQVL	RIH	JSH004	545
URYDL	RMDDR	JSH004	531
RMDDL	URYDR	JSH004	482
RMEV	RMDDR	JSH004	454
IL2L	RIH	JSH004	430
URYDL	RMDVL	JSH004	403
RMED	IL2DR	JSH004	371
URYDL	RMED	JSH004	353
URYDL	RIBL	JSH004	346
RMDVL	RMDDR	JSH004	332
AVER	RIBL	JSH004	328
RMEV	IL2L	JSH004	326
RMER	IL2DR	JSH004	325
RMDVR	URYDR	JSH004	323
OLLL	OLQDL	JSH004	307
IL1DL	OLLL	JSH004	284
RMEV	RMED	JSH004	279
IL1L	IL2L	JSH004	266
RMED	RIH	JSH004	259
RMDDL	URYDR	JSH004	251
IL1DL	OLLL	JSH004	250
RIBL	OLQDL	JSH004	233
CEPDR	RIH	JSH004	222
RMER	RMEL	JSH004	212
AVER	OLQDL	JSH004	210
URXL	URYDL	JSH004	206
RMEV	URADR	JSH004	204
IL1DL	OLQDL	JSH004	202
RMEV	SMDVL	JSH004	200
RIPL	IL2DL	JSH004	194
IL1DL	IL2DL	JSH004	190
URYDL	CEPDL	JSH004	186
RMED	IL1R	JSH004	178
URYDL	IL2DL	JSH004	178
RMEV	IL1L	JSH004	173
RMED	URYDR	JSH004	171
URXL	CEPDL	JSH004	162
URBL	IL2L	JSH004	154
RMDVL	IL1DL	JSH004	153
AVER	OLLL	JSH004	150
IL1R	IL2DR	JSH004	146
URYDL	IL1DL	JSH004	145
IL1R	RMDDL	JSH004	144
URBL	OLLL	JSH004	143
RMEV	RMDDL	JSH004	140
RMER	RMEV	JSH004	140
URYDL	OLQDL	JSH004	139
RMER	URADR	JSH004	137
RMED	IL1L	JSH004	131
URYDL	IL1DL	JSH004	129
IL2DR	RMEL	JSH004	127
OLLR	IL2R	JSH004	117
AVER	OLQDL	JSH004	110
RIH	URXR	JSH004	110
CEPDL	IL2DL	JSH004	109
IL1R	URYDR	JSH004	107
URADR	RMEL	JSH004	99
IL2VR	CEPVR	JSH004	95
CEPDL	URADL	JSH004	93
RMEV	URYDR	JSH004	90
RMEV	IL1DL	JSH004	85
CEPDR	IL2DR	JSH004	84
IL1L	IL1DL	JSH004	81
IL1DR	IL1DL	JSH004	75
IL1DR	IL2DR	JSH004	74
RMEV	IL1DR	JSH004	72
RMEV	IL1R	JSH004	72
URYDL	OLQDL	JSH004	65
RIPL	RIH	JSH004	61
IL1DR	OLLL	JSH004	55
URADR	IL1R	JSH004	55
URYDL	URADL	JSH004	52
IL1DL	IL2DL	JSH004	46
URYDL	IL1DL	JSH004	46
IL1R	URYDR	JSH004	44
URADR	URYDR	JSH004	44
IL2VL	CEPVL	JSH004	43
URADR	URYDR	JSH004	42
OLQVL	IL2L	JSH004	40
URADR	IL1DR	JSH004	38
IL1DL	OLQDL	JSH004	32
OLQDL	IL2DL	JSH004	29
IL1DL	URADL	JSH004	27
URADL	IL2DL	JSH004	26
RMEV	IL2DR	JSH004	23
URADR	IL2DR	JSH004	22
CEPDR	URXR	JSH004	19
SMDVL	IL1DL	JSH004	18
IL1L	IL2L	JSH004	6
OLLL	RMDVL	JSH005	1921
RMDVL	IL1DL	JSH005	1744
OLLL	AVER	JSH005	1473
URYDL	AVER	JSH005	1347
URYDL	RMDDR	JSH005	935
RIH	URYDR	JSH005	867
URADL	RIPL	JSH005	854
RIPL	IL1DL	JSH005	702
OLLL	IL1DL	JSH005	661
RIH	OLQVL	JSH005	648
RMDDL	URYDR	JSH005	627
RMDDL	RMDDR	JSH005	521
RIBL	AVER	JSH005	445
IL1DL	RMDDR	JSH005	417
RMDVR	URYDR	JSH005	410
IL2DR	RMED	JSH005	402
URYDL	RMDVL	JSH005	380
IL2DR	RMER	JSH005	374
RMDDL	URYDR	JSH005	323
RMEV	URADR	JSH005	319
RIH	RMED	JSH005	316
OLLL	AVER	JSH005	306
RIBL	URYDL	JSH005	294
IL1R	RMED	JSH005	287
RIH	IL2L	JSH005	285
RMEV	RMDDR	JSH005	274
RMEV	SMDVL	JSH005	267
RMEV	RMED	JSH005	264
OLQDL	IL1DL	JSH005	255
RMDVL	RMDDR	JSH005	242
RMEV	RMDDR	JSH005	233
RIBL	OLQDR	JSH005	226
AVER	OLQDR	JSH005	218
RMEV	IL2L	JSH005	214
RIH	OLQDR	JSH005	210
OLLL	IL1DR	JSH005	206
IL1L	RMED	JSH005	200
CEPDR	RIH	JSH005	191
OLLL	OLQDR	JSH005	187
URYDR	RMED	JSH005	186
IL2DL	RIPL	JSH005	180
RIBL	OLLL	JSH005	175
RMEL	RMER	JSH005	172
RMEV	IL1DR	JSH005	170
URYDL	CEPDL	JSH005	168
URBL	IL2L	JSH005	166
IL1R	RMDDL	JSH005	165
OLLL	IL1DL	JSH005	163
URXL	URYDL	JSH005	162
URXL	CEPDL	JSH005	160
RMEV	RMER	JSH005	159
URYDL	IL1DL	JSH005	157
IL1L	IL2L	JSH005	156
IL2DR	RMEL	JSH005	155
URYDL	IL2DL	JSH005	151
OLQDR	IL1DR	JSH005	150
RIPL	RIH	JSH005	148
AVER	OLQDR	JSH005	147
URADR	RMER	JSH005	146
URBL	OLLL	JSH005	145
URYDL	IL1DL	JSH005	144
RMEV	IL1L	JSH005	134
CEPDR	URXR	JSH005	122
OLLR	IL2R	JSH005	122
IL2DL	IL1DL	JSH005	120
IL1R	RMEV	JSH005	118
IL1R	IL2DR	JSH005	115
IL1R	URYDR	JSH005	112
IL2DL	CEPDL	JSH005	110
OLQDL	IL2DL	JSH005	110
RMDVL	IL1DL	JSH005	110
URADR	URYDR	JSH005	106
OLQVL	IL2L	JSH005	102
IL1DL	RMDDR	JSH005	102
IL1L	IL1DL	JSH005	101
URXR	RIH	JSH005	99
RMEV	RMDDL	JSH005	96
IL2VR	CEPVR	JSH005	96
URADR	RMEL	JSH005	94
IL1R	URYDR	JSH005	88
URYDL	OLQDL	JSH005	84
IL1R	URADR	JSH005	83
URADL	CEPDL	JSH005	83
OLLL	SMDVL	JSH005	73
RMEV	URYDR	JSH005	70
OLQDR	URYDR	JSH005	70
URYDL	SMDVL	JSH005	68
CEPDR	IL2DR	JSH005	67
IL2DR	IL1DR	JSH005	63
RIBL	AVER	JSH005	60
URYDL	IL1DL	JSH005	52
OLQDL	IL1DL	JSH005	51
IL2VL	CEPVL	JSH005	45
URYDL	URADL	JSH005	45
IL2DL	IL1DL	JSH005	44
URADL	IL1DL	JSH005	42
URYDL	OLQDL	JSH005	39
IL1DR	URADR	JSH005	37
URADR	URYDR	JSH005	34
IL1L	IL2L	JSH005	26
IL2DR	URADR	JSH005	24
URADL	IL2DL	JSH005	20
RIBL	URYDL	JSH005	18
RMEV	IL1DR	JSH005	18
CEPDR	IL1DR	JSH005	17
RMEV	OLLL	JSH005	10
OLLL	IL2L	JSH005	1
OLLL	AVER	JSH006	2055
OLLL	RMDVL	JSH006	1920
RMDVL	IL1DL	JSH006	1842
URYDL	AVER	JSH006	1371
RIH	URYDR	JSH006	1012
URADL	RIPL	JSH006	811
RIBL	AVER	JSH006	765
RMDVR	URYDR	JSH006	717
RMDDL	RMDDR	JSH006	685
OLLL	IL1DL	JSH006	657
RMDDL	URYDR	JSH006	650
RIH	OLQVL	JSH006	638
RIPL	IL1DL	JSH006	619
URYDL	RMDDR	JSH006	601
IL2DR	RMER	JSH006	427
IL2DR	RMED	JSH006	409
URYDL	RMDVL	JSH006	405
RMDDL	URYDR	JSH006	397
RMDDL	RMDDR	JSH006	356
RMDVL	RMDDR	JSH006	341
URYDL	RMED	JSH006	316
RMEV	RMDDR	JSH006	314
RMEV	SMDVL	JSH006	286
RIH	URYDR	JSH006	286
IL1DL	RMDDR	JSH006	285
RIBL	URYDL	JSH006	276
OLQDL	IL1DL	JSH006	276
RIH	RMED	JSH006	274
URXL	URYDL	JSH006	260
RMEV	IL1DR	JSH006	256
IL1R	RMED	JSH006	247
RIH	IL2L	JSH006	246
OLLL	SMDVL	JSH006	243
URYDL	CEPDL	JSH006	230
RMEV	RMDDR	JSH006	221
URYDL	IL2DL	JSH006	220
RMEV	IL2L	JSH006	218
RMEV	URADR	JSH006	215
RMEV	RMED	JSH006	205
RMEL	RMER	JSH006	191
IL1R	RMDDL	JSH006	190
OLQVL	IL2L	JSH006	180
IL2DL	IL1DL	JSH006	177
RMEV	URYDR	JSH006	175
IL1L	RMED	JSH006	170
CEPDR	RIH	JSH006	166
URXL	CEPDL	JSH006	160
RMEV	RMER	JSH006	155
URYDL	IL1DL	JSH006	153
URBL	IL2L	JSH006	152
IL1R	IL2DR	JSH006	147
RIH	OLQDR	JSH006	147
OLLL	IL1DL	JSH006	145
IL2DL	RIPL	JSH006	142
URBL	OLLL	JSH006	130
IL2VR	CEPVR	JSH006	130
URYDL	IL1DL	JSH006	129
RIPL	RIH	JSH006	121
URADR	RMEL	JSH006	121
URADR	RMER	JSH006	121
OLLL	IL1DR	JSH006	118
RMEV	IL1L	JSH006	116
RIBL	URYDL	JSH006	111
RMDDL	URYDR	JSH006	111
RIBL	RIS	JSH006	110
IL1L	IL1DL	JSH006	106
IL1R	URADR	JSH006	102
IL1R	URYDR	JSH006	99
IL2DR	RMEL	JSH006	98
CEPDR	URXR	JSH006	97
IL2DL	CEPDL	JSH006	97
OLLR	IL2R	JSH006	96
RMDDL	URADR	JSH006	95
RMEV	RMDDL	JSH006	92
URADR	URYDR	JSH006	90
URYDR	RMED	JSH006	90
OLQDL	IL2DL	JSH006	90
RMDVL	IL1DL	JSH006	85
URYDL	OLQDL	JSH006	84
IL2DR	IL1DR	JSH006	83
IL1L	IL2L	JSH006	82
CEPDR	IL2DR	JSH006	76
RMEV	IL2DR	JSH006	76
IL1DR	URADR	JSH006	68
URADL	CEPDL	JSH006	67
URXR	RIH	JSH006	54
IL1L	IL2L	JSH006	53
IL2VL	CEPVL	JSH006	47
IL1R	RMEV	JSH006	44
IL2DL	IL1DL	JSH006	44
URYDL	URADL	JSH006	38
URYDL	OLQDL	JSH006	36
OLQDL	IL1DL	JSH006	31
IL1R	URYDR	JSH006	25
IL1VR	IL2VR	JSH006	23
IL2DR	URADR	JSH006	22
URADR	URYDR	JSH006	20
URADL	IL1DL	JSH006	19
OLLL	IL2L	JSH006	18
URADL	IL2DL	JSH006	18
RMEV	OLLL	JSH006	16
URYDL	IL1DL	JSH006	14
RIBL	AVER	JSH006	12
URYDL	OLLL	JSH006	11
URBL	IL1L	JSH006	4
OLLL	AVER	JSH007	2074
OLLL	RMDVL	JSH007	1959
URYDL	AVER	JSH007	1526
RMDVL	IL1DL	JSH007	1411
RIBL	AVER	JSH007	629
RIH	OLQVL	JSH007	605
RIH	URYDR	JSH007	592
OLLL	IL1DL	JSH007	584
IL1DR	URYDR	JSH007	565
RIBL	URYDL	JSH007	556
URADL	RIPL	JSH007	489
IL2DR	RIPR	JSH007	462
IL2DR	RMER	JSH007	431
RMDDL	RMDDR	JSH007	420
RIH	RIPR	JSH007	402
RIH	OLQDR	JSH007	384
RMEV	RMDDR	JSH007	373
IL2DR	RMED	JSH007	369
RMEV	SMDVR	JSH007	352
RMEV	SMDVL	JSH007	317
OLLL	SMDVL	JSH007	296
RIH	URYDR	JSH007	295
RMEV	RMDDR	JSH007	290
URYDL	RMDVL	JSH007	285
RMEV	URADR	JSH007	262
RIH	RMED	JSH007	260
RIBL	OLLL	JSH007	260
RMEL	RMER	JSH007	253
IL2DR	RIH	JSH007	229
RMEV	IL2L	JSH007	195
URXL	URYDL	JSH007	194
URADL	IL2DL	JSH007	191
RMEV	IL2DR	JSH007	182
IL1DL	RMDDR	JSH007	182
OLLL	IL1DL	JSH007	180
RIBL	RIS	JSH007	176
RIBL	URYDL	JSH007	173
IL1R	IL2DR	JSH007	168
IL1L	RMDDR	JSH007	163
IL1R	IL1DR	JSH007	162
URYDL	CEPDL	JSH007	159
URXL	CEPDL	JSH007	157
IL1L	RMED	JSH007	149
IL1L	IL1DL	JSH007	146
URADR	RMEL	JSH007	145
IL1R	RMEV	JSH007	144
IL2DL	CEPDL	JSH007	139
OLQDR	IL1DR	JSH007	137
URYDL	IL2DL	JSH007	136
CEPDR	RIH	JSH007	120
IL1R	URADR	JSH007	116
RMDVL	IL1DL	JSH007	113
RIPL	RIH	JSH007	110
IL2VR	CEPVR	JSH007	106
URADR	RMER	JSH007	105
RIBL	AVER	JSH007	104
RIPL	IL1DL	JSH007	99
RIBL	OLLL	JSH007	94
RMEV	RMER	JSH007	88
OLLL	IL1DR	JSH007	84
RIBL	RIS	JSH007	83
URYDL	OLQDL	JSH007	81
IL2R	OLLR	JSH007	79
RMEV	RMED	JSH007	79
RIPR	RMED	JSH007	78
IL2DR	RMEL	JSH007	71
IL2VL	CEPVL	JSH007	67
IL2DL	RIPL	JSH007	65
CEPDR	IL2DR	JSH007	62
URYDL	URADL	JSH007	62
IL2DL	IL1DL	JSH007	60
URYDR	RMED	JSH007	58
RMEV	IL1L	JSH007	58
IL2DR	IL1DR	JSH007	54
RIH	IL2L	JSH007	54
OLQVL	IL2L	JSH007	52
IL2DR	URADR	JSH007	50
URADL	IL1DL	JSH007	49
RMEV	OLLL	JSH007	47
IL1VR	IL2VR	JSH007	43
URYDL	IL1DL	JSH007	42
RMEV	IL1DR	JSH007	39
IL1DR	RMED	JSH007	38
URADR	URYDR	JSH007	36
RIBL	OLQDL	JSH007	31
IL1DR	URADR	JSH007	26
URYDL	IL1DL	JSH007	26
RMDVL	RMDDR	JSH007	24
URADL	IL1DL	JSH007	20
OLQDR	URYDR	JSH007	16
OLLL	RMDVL	JSH008	1897
RMDVL	IL1DL	JSH008	1504
OLLL	AVER	JSH008	1150
URADL	RIPL	JSH008	917
URYDL	AVER	JSH008	818
RIPL	IL1DL	JSH008	804
URYDL	AVER	JSH008	733
OLLL	IL1DL	JSH008	731
RIH	URYDR	JSH008	688
RIBL	URYDL	JSH008	676
RIH	OLQVL	JSH008	648
IL1L	RMDDR	JSH008	597
OLLL	AVER	JSH008	593
RIBL	AVER	JSH008	580
RMDVR	URYDR	JSH008	572
RMDDL	URYDR	JSH008	572
RIBL	RMER	JSH008	502
RMDDL	RMDDR	JSH008	482
RMDDL	RMDDR	JSH008	467
RIS	RMER	JSH008	458
RMDVR	IL1DR	JSH008	445
RMDVR	URYDR	JSH008	413
RMEV	RMDDR	JSH008	409
URYDL	RMDDR	JSH008	404
RIH	OLQDR	JSH008	382
IL2DR	RMED	JSH008	375
IL2DR	RIPR	JSH008	367
OLLL	CEPDL	JSH008	364
OLLL	SMDDR	JSH008	363
IL1L	IL1DL	JSH008	360
RMDVL	RMDDR	JSH008	358
AVER	CEPDL	JSH008	345
RIBL	URYDL	JSH008	339
OLLL	RMER	JSH008	337
RMEV	SMDVR	JSH008	333
AVER	CEPDL	JSH008	326
OLQVL	IL2L	JSH008	314
RIH	OLQDR	JSH008	302
RIH	RMED	JSH008	301
IL2DR	RMER	JSH008	293
RIBL	RIS	JSH008	284
RMEV	SMDVL	JSH008	283
OLLL	SMDVL	JSH008	282
IL1DL	OLQDL	JSH008	279
IL1DL	RMDDR	JSH008	277
RMEV	IL2L	JSH008	273
RIH	IL2DR	JSH008	273
URYDL	RMDVL	JSH008	272
RMEV	URADR	JSH008	265
IL1R	RMDDL	JSH008	263
URYDL	RMED	JSH008	263
RMEV	RMDDR	JSH008	262
OLLL	RMER	JSH008	262
RMEV	IL2DR	JSH008	259
IL1L	RMER	JSH008	256
RIH	URYDR	JSH008	250
URYDL	OLLL	JSH008	244
IL1R	IL1DR	JSH008	240
RIH	RIPR	JSH008	237
RMDVR	IL1DR	JSH008	229
OLLL	CEPDL	JSH008	220
URYDL	SMDDR	JSH008	204
URYDL	RMDVL	JSH008	202
IL1R	URADR	JSH008	201
AVER	CEPDL	JSH008	198
RMEL	RMER	JSH008	196
IL2DL	RIPL	JSH008	190
RIBL	RIS	JSH008	189
IL1L	RMED	JSH008	181
RMEV	IL1DR	JSH008	177
RMEV	URYDR	JSH008	175
RIH	IL2L	JSH008	174
CEPDR	RIH	JSH008	169
IL1R	IL2DR	JSH008	167
URYDL	CEPDL	JSH008	159
RMER	RMED	JSH008	157
RMEV	RMDDL	JSH008	150
IL2DL	IL1DL	JSH008	149
AVER	SMDDR	JSH008	149
URXL	URYDL	JSH008	147
URYDL	IL2DL	JSH008	141
URYDL	IL1DL	JSH008	134
URBL	OLLL	JSH008	132
URXL	CEPDL	JSH008	127
AVER	SMDDR	JSH008	125
RIPL	RIH	JSH008	123
RIBL	CEPDL	JSH008	123
URBL	IL2L	JSH008	122
IL1DL	RMER	JSH008	117
RIBL	AVER	JSH008	114
IL1DR	SMDVR	JSH008	111
OLQDR	IL1DR	JSH008	107
OLLL	IL1DR	JSH008	107
CEPDR	URXR	JSH008	104
RIBL	RMER	JSH008	103
IL2DL	CEPDL	JSH008	100
IL2VR	CEPVR	JSH008	99
URYDL	OLQDL	JSH008	98
IL1R	RMEV	JSH008	96
RIBL	OLLL	JSH008	96
RMEV	RMER	JSH008	95
OLQDR	URYDR	JSH008	94
IL2DR	RMEL	JSH008	93
URADL	CEPDL	JSH008	92
IL1R	RMDVR	JSH008	92
URADR	RMER	JSH008	88
IL1DR	URYDR	JSH008	87
IL2L	RMED	JSH008	83
RMEV	RMED	JSH008	78
URBL	IL1L	JSH008	76
URADL	IL1DL	JSH008	76
IL2DL	OLQDL	JSH008	74
URADR	RMEL	JSH008	74
RIPR	RMED	JSH008	73
RMEV	OLLL	JSH008	73
OLLL	IL2L	JSH008	70
OLLR	IL2R	JSH008	69
IL2DR	IL1DR	JSH008	58
IL2DR	IL1DR	JSH008	56
IL2DL	IL1DL	JSH008	53
URXR	RIH	JSH008	52
URYDL	IL1DL	JSH008	52
URYDL	URADL	JSH008	51
IL1L	IL2L	JSH008	50
URADL	IL1DL	JSH008	50
CEPDR	IL2DR	JSH008	49
IL1L	IL2L	JSH008	48
IL1DL	OLQDL	JSH008	46
URADL	IL2DL	JSH008	42
CEPDL	RMER	JSH008	42
RIS	CEPDL	JSH008	40
IL2VL	CEPVL	JSH008	40
URYDL	OLQDL	JSH008	39
URADR	URYDR	JSH008	34
URADR	IL2DR	JSH008	32
RIH	IL1DR	JSH008	27
RIBL	OLLL	JSH008	22
RMED	RMDDR	JSH008	22
RMDVL	RMED	JSH008	20
URYDL	CEPDL	JSH008	16
RMEV	OLLL	JSH008	14
IL1R	URYDR	JSH008	6
RMDVR	RMDDL	JSH008	5
IL1DR	URYDR	JSH008	2
RMDVL	IL1DL	JSH009	1688
URADL	RIPL	JSH009	924
OLLL	AVER	JSH009	870
OLLL	RMDVL	JSH009	829
OLLL	RMDVL	JSH009	821
OLLL	IL1DL	JSH009	740
RMDVR	URYDR	JSH009	697
URYDL	AVER	JSH009	694
RIPL	IL1DL	JSH009	665
RIBL	RMER	JSH009	650
RIH	OLQVL	JSH009	630
RIS	RMER	JSH009	605
IL1L	RMDDR	JSH009	603
OLLL	CEPDL	JSH009	598
RMDVR	IL1DR	JSH009	593
RIBL	URYDL	JSH009	551
RMDDL	URYDR	JSH009	477
OLLL	RMER	JSH009	476
RIBL	AVER	JSH009	471
RMDDL	RMDDR	JSH009	457
RIH	URYDR	JSH009	429
RIH	OLQDR	JSH009	428
OLLL	SMDDR	JSH009	427
RMDVR	URYDR	JSH009	414
RMDDL	RMDDR	JSH009	410
OLQVL	IL2L	JSH009	406
AVER	CEPDL	JSH009	392
RMDVL	RMDDR	JSH009	389
IL1L	IL1DL	JSH009	385
RIH	IL2DR	JSH009	382
OLLL	AVER	JSH009	369
IL2DR	RMER	JSH009	362
OLLL	CEPDL	JSH009	357
IL1R	URADR	JSH009	352
RMEV	RMDDR	JSH009	342
IL1L	RMER	JSH009	325
RMEV	SMDVL	JSH009	313
RIH	URYDR	JSH009	306
URYDL	SMDDR	JSH009	305
IL1DL	OLQDL	JSH009	305
RMEV	SMDVR	JSH009	304
OLLL	RMER	JSH009	304
RMDVR	IL1DR	JSH009	301
IL2DR	RMED	JSH009	294
URYDL	RMDVL	JSH009	281
RIBL	URYDL	JSH009	279
URYDL	RMED	JSH009	277
RMDVL	CEPDL	JSH009	274
RIH	OLQDR	JSH009	254
RMEV	RMDDR	JSH009	253
URYDL	CEPDL	JSH009	250
OLLL	CEPDL	JSH009	246
RIBL	RIS	JSH009	230
RMEV	IL2L	JSH009	229
RMEV	URADR	JSH009	220
RIH	RIPR	JSH009	215
RMEV	IL1DR	JSH009	211
RIBL	RIS	JSH009	211
RIS	CEPDL	JSH009	208
URYDL	CEPDL	JSH009	208
AVER	CEPDL	JSH009	207
RMEL	RMER	JSH009	206
IL1R	IL1DR	JSH009	192
OLLR	OLLL	JSH009	190
URYDL	RMDDR	JSH009	186
IL1L	RMED	JSH009	179
RMER	RMED	JSH009	177
AVER	CEPDL	JSH009	176
IL1DR	SMDVR	JSH009	175
IL2DR	RIPR	JSH009	169
RIH	IL2L	JSH009	159
IL1R	IL2DR	JSH009	157
RIH	RMED	JSH009	156
RMEV	RMDDL	JSH009	142
CEPDR	RIH	JSH009	140
IL2DL	RIPL	JSH009	135
URYDL	RMDVL	JSH009	133
URBL	OLLL	JSH009	131
OLLR	IL1DR	JSH009	130
URBL	IL2L	JSH009	126
IL2DR	IL1DR	JSH009	125
RIBL	OLLL	JSH009	122
RIPL	RIH	JSH009	121
CEPDR	URXR	JSH009	121
RMDVR	RMDDL	JSH009	121
IL1R	RMDDL	JSH009	119
OLQDR	IL1DR	JSH009	116
URADR	RMER	JSH009	111
OLQDR	URYDR	JSH009	110
IL1R	RMEV	JSH009	110
RIBL	RIS	JSH009	108
URADR	RMEL	JSH009	108
OLLL	SMDDR	JSH009	108
RIBL	AVER	JSH009	106
RIBL	URYDL	JSH009	102
IL1R	RMDVR	JSH009	100
RIS	AVER	JSH009	98
IL2DR	RIPR	JSH009	97
URYDL	OLLL	JSH009	93
AVER	SMDDR	JSH009	91
RIBL	OLLL	JSH009	91
IL1L	RMDDR	JSH009	91
URADL	IL1DL	JSH009	89
RIBL	CEPDL	JSH009	85
URYDL	AVER	JSH009	85
URYDL	SMDDR	JSH009	84
RIBL	RIS	JSH009	84
URXR	RIH	JSH009	84
RMEV	IL2DR	JSH009	83
RMEV	OLLR	JSH009	78
IL1L	IL2L	JSH009	76
IL2VR	CEPVR	JSH009	74
IL2DL	IL1DL	JSH009	72
IL2DL	OLQDL	JSH009	70
IL2L	RMED	JSH009	70
RMDVL	RMED	JSH009	67
IL2DR	RMEL	JSH009	67
RMEV	RIPR	JSH009	63
OLQDR	URYDR	JSH009	61
RMEV	OLLL	JSH009	60
IL2VL	CEPVL	JSH009	59
OLLL	CEPDL	JSH009	58
RMEV	RMER	JSH009	58
SMDVL	SMDDR	JSH009	55
IL2DR	IL1DR	JSH009	54
IL1DL	RMDDR	JSH009	50
URBL	IL1L	JSH009	49
RMEV	OLLR	JSH009	48
IL1DL	RMER	JSH009	48
RMDDL	URYDR	JSH009	47
AVER	RMDVL	JSH009	46
URYDR	RMED	JSH009	46
OLLL	IL2L	JSH009	46
RIPR	RMED	JSH009	41
CEPDR	IL2DR	JSH009	40
RMEV	RMED	JSH009	40
URADR	URYDR	JSH009	38
OLLR	IL2R	JSH009	38
RMDVL	CEPDL	JSH009	36
URYDL	CEPDL	JSH009	28
IL1L	IL2L	JSH009	26
URADR	IL2DR	JSH009	26
IL1DR	URYDR	JSH009	24
IL1DR	URYDR	JSH009	22
URADR	IL1DR	JSH009	16
OLLL	SMDVL	JSH009	10
RMEV	IL2DR	JSH009	7
RIH	IL2DR	JSH009	3
RMDVL	CEPDL	JSH010	1754
RMDVL	IL1DL	JSH010	1693
RMDVR	URYDR	JSH010	1340
RMDVR	IL1DR	JSH010	1075
RIBL	URYDL	JSH010	844
IL1L	RMDDR	JSH010	815
URADL	RIPL	JSH010	767
OLLL	IL1DL	JSH010	681
RIBL	RMER	JSH010	634
RIH	OLQVL	JSH010	596
RIS	RMER	JSH010	591
RIH	OLQDR	JSH010	579
RIPL	IL1DL	JSH010	560
URYDL	AVER	JSH010	501
RMDDL	RMDDR	JSH010	495
URYDL	SMDDR	JSH010	485
IL1L	IL1DL	JSH010	475
OLLL	RMER	JSH010	474
RMDDL	URYDR	JSH010	437
RIBL	URYDL	JSH010	408
OLLL	AVER	JSH010	406
OLQVL	IL2L	JSH010	401
URYDL	CEPDL	JSH010	374
RMDVL	RMDDR	JSH010	357
RIBL	AVER	JSH010	356
RMEV	RMDDR	JSH010	343
IL2DR	RMED	JSH010	341
RMEV	SMDVL	JSH010	340
RMEV	SMDVR	JSH010	333
URYDL	RMDVL	JSH010	321
RIH	URYDR	JSH010	312
RMDVR	RMDDL	JSH010	307
OLLL	CEPDL	JSH010	303
URADR	RMEL	JSH010	301
OLQDR	RMED	JSH010	299
RMDDL	RMDDR	JSH010	298
IL1L	IL2L	JSH010	296
RIH	OLQDR	JSH010	295
RIS	CEPDL	JSH010	293
SMDDR	CEPDL	JSH010	290
RMEV	RMDDR	JSH010	285
URYDL	RMED	JSH010	280
IL1DL	OLQDL	JSH010	279
IL1R	URADR	JSH010	266
IL1R	RMDVR	JSH010	265
IL2R	RIH	JSH010	262
OLLL	SMDDR	JSH010	260
RIH	OLQDR	JSH010	252
OLLL	RMER	JSH010	246
IL1R	IL2DR	JSH010	243
OLLL	CEPDL	JSH010	240
OLQDR	URYDR	JSH010	234
RMEL	RMER	JSH010	226
IL1DR	SMDVR	JSH010	225
RMEV	IL2L	JSH010	223
AVER	CEPDL	JSH010	223
RMEV	RIPR	JSH010	217
RIH	URYDR	JSH010	215
RIH	IL2L	JSH010	212
IL1L	RMER	JSH010	212
OLLL	AVER	JSH010	206
IL2DR	RMER	JSH010	190
IL2R	OLQDR	JSH010	188
RIS	SMDDR	JSH010	188
OLLR	OLLL	JSH010	182
URYDR	RMED	JSH010	181
RIPL	RIH	JSH010	175
RMEV	URADR	JSH010	175
RMEV	OLLR	JSH010	169
RMEV	IL1DR	JSH010	168
IL1R	IL1DR	JSH010	164
URYDL	CEPDL	JSH010	163
URYDL	SMDDR	JSH010	162
RIBL	OLLL	JSH010	161
RMEV	OLLL	JSH010	157
IL2DR	RIPR	JSH010	156
SMDVL	SMDDR	JSH010	156
URYDL	RMDDR	JSH010	152
OLLL	SMDDR	JSH010	152
RIBL	RIS	JSH010	148
URYDL	IL1DL	JSH010	141
AVER	SMDDR	JSH010	140
RIBL	OLLL	JSH010	139
URXL	CEPDL	JSH010	137
CEPDR	RIH	JSH010	134
RMEV	IL2DR	JSH010	131
URYDL	RMDVL	JSH010	130
RIH	IL2DR	JSH010	130
URBL	IL2L	JSH010	129
IL2DL	RIPL	JSH010	128
URADR	RMER	JSH010	127
OLLR	IL1DR	JSH010	127
URBL	OLLL	JSH010	123
IL2DR	IL1DR	JSH010	123
CEPDR	URXR	JSH010	122
IL1L	RMED	JSH010	118
RMDDL	RMED	JSH010	116
RIBL	RIS	JSH010	115
IL2DL	CEPDL	JSH010	114
URYDL	IL2DL	JSH010	112
URXL	URYDL	JSH010	108
RMEV	RMDDL	JSH010	103
RIBL	RIS	JSH010	102
OLQDR	IL1DR	JSH010	100
IL2R	IL2DR	JSH010	100
RIBL	RIS	JSH010	99
URYDL	CEPDL	JSH010	98
URADL	CEPDL	JSH010	98
IL2R	RIH	JSH010	97
RMDVL	RMED	JSH010	96
RIS	AVER	JSH010	90
IL2DL	OLQDL	JSH010	89
IL2VR	CEPVR	JSH010	88
URYDR	RMED	JSH010	87
RIBL	SMDDR	JSH010	86
IL1DR	URYDR	JSH010	80
RIH	RIPR	JSH010	79
IL2DL	IL1DL	JSH010	77
URXR	RIH	JSH010	75
RMDVR	RMED	JSH010	74
OLLL	SMDVL	JSH010	72
RMEV	RMER	JSH010	71
URBL	IL1L	JSH010	70
CEPDR	IL2DR	JSH010	68
URYDL	OLQDL	JSH010	67
IL1L	IL2L	JSH010	64
RMEV	IL2DR	JSH010	64
IL2DR	IL1DR	JSH010	61
RMDVR	IL2DR	JSH010	59
URADR	URYDR	JSH010	58
URYDL	IL1DL	JSH010	57
IL2DL	IL1DL	JSH010	56
RMEV	OLLR	JSH010	56
IL1DL	OLQDL	JSH010	54
OLLL	IL2L	JSH010	54
URYDL	OLQDL	JSH010	54
RIH	IL1DR	JSH010	49
OLLR	IL2R	JSH010	48
RIH	RMED	JSH010	48
AVER	SMDDR	JSH010	48
OLQDR	URYDR	JSH010	47
IL2VL	CEPVL	JSH010	47
IL1R	RMEV	JSH010	47
RIBL	OLQDL	JSH010	47
URADL	IL1DL	JSH010	46
URYDL	RIS	JSH010	46
IL1DR	URYDR	JSH010	44
URYDL	OLLL	JSH010	43
URADL	IL2DL	JSH010	35
URADR	IL2DR	JSH010	32
URADR	IL1DR	JSH010	28
RMEV	RMED	JSH010	27
RMER	RMED	JSH010	27
RIH	IL2DR	JSH010	27
OLLL	CEPDL	JSH010	22
URYDL	URADL	JSH010	20
RMDDL	URYDR	JSH010	20
IL1L	RMDDR	JSH010	18
AVER	CEPDL	JSH010	17
RMEV	URYDR	JSH010	13
IL1DL	CEPDL	JSH010	8
RIS	AVER	JSH010	2
IL1R	RMDDL	JSH010	2
RMDVL	IL1DL	JSH011	1676
RMDVL	CEPDL	JSH011	1623
RMDVR	URYDR	JSH011	961
URADL	RIPL	JSH011	902
RMDVR	IL1DR	JSH011	897
RIBL	URYDL	JSH011	777
IL1L	RMDDR	JSH011	699
RIBL	RMER	JSH011	670
OLLL	RMER	JSH011	668
RIPL	IL1DL	JSH011	666
IL1R	URADR	JSH011	649
RIH	OLQVL	JSH011	610
URYDL	SMDDR	JSH011	594
OLQVL	IL2L	JSH011	533
RIS	RMER	JSH011	528
RMDDL	RMDDR	JSH011	493
RIBL	URYDL	JSH011	469
OLLL	AVER	JSH011	458
URYDL	CEPDL	JSH011	439
RIS	CEPDL	JSH011	432
RIH	OLQDR	JSH011	416
RIBL	AVER	JSH011	400
RMDVR	URYDR	JSH011	388
URYDL	AVER	JSH011	386
RMEV	SMDVL	JSH011	380
RMDVL	RMDDR	JSH011	378
IL2R	OLQDR	JSH011	366
SMDDR	CEPDL	JSH011	361
OLLL	RMER	JSH011	354
RMDVR	RMDDL	JSH011	350
OLQDR	RMED	JSH011	338
RMEV	RMDDR	JSH011	330
RMEV	RMDDR	JSH011	330
IL1DL	OLQDL	JSH011	327
RMDDL	URYDR	JSH011	325
IL1L	IL1DL	JSH011	323
OLLL	CEPDL	JSH011	309
OLLL	SMDDR	JSH011	304
IL2DR	RMED	JSH011	300
RMEV	SMDVR	JSH011	298
OLLR	OLLL	JSH011	295
RMDVR	IL1DR	JSH011	291
IL2DR	RIPR	JSH011	285
AVER	CEPDL	JSH011	282
IL1L	RMER	JSH011	266
IL1R	RMDVR	JSH011	261
URYDL	RMDVL	JSH011	259
IL1DL	RMDDR	JSH011	258
OLLL	IL1DL	JSH011	255
RIPL	RIH	JSH011	253
RIH	IL2L	JSH011	249
URYDL	RMED	JSH011	248
OLQDR	URYDR	JSH011	233
RIS	AVER	JSH011	231
IL1DR	SMDVR	JSH011	227
RMEV	IL2L	JSH011	222
RIH	URYDR	JSH011	222
URYDL	CEPDL	JSH011	221
RMEV	RIPR	JSH011	218
OLLL	CEPDL	JSH011	211
URADR	RMEL	JSH011	208
RIH	URYDR	JSH011	205
RIH	OLQDR	JSH011	202
RIS	SMDDR	JSH011	201
IL1R	IL1DR	JSH011	199
OLLL	SMDDR	JSH011	197
OLLL	AVER	JSH011	195
URYDR	RMED	JSH011	193
URADR	IL2DR	JSH011	192
RIH	OLQDR	JSH011	188
OLLL	RMDVL	JSH011	185
IL2R	RMER	JSH011	184
IL2DR	RMER	JSH011	180
RIBL	OLLL	JSH011	179
SMDVL	SMDDR	JSH011	171
RMEV	URADR	JSH011	169
RMDVL	IL1L	JSH011	167
RMEV	RMDDL	JSH011	166
RMEV	OLLR	JSH011	162
IL2DL	RIPL	JSH011	162
URYDL	RMDDR	JSH011	161
URYDL	RIS	JSH011	159
URYDL	CEPDL	JSH011	155
URXL	CEPDL	JSH011	148
RMEL	RMER	JSH011	145
RMER	RMED	JSH011	145
RIBL	RIS	JSH011	144
URXL	URYDL	JSH011	140
URBL	OLLL	JSH011	130
IL2R	RIH	JSH011	130
IL2R	RIH	JSH011	126
RMDVL	RMED	JSH011	125
RMDDL	RMDDR	JSH011	124
IL2R	IL2DR	JSH011	121
CEPDR	URXR	JSH011	120
IL2L	RMED	JSH011	119
URYDL	IL1DL	JSH011	116
URADR	RMER	JSH011	116
RMDDL	RMED	JSH011	116
IL1L	RMED	JSH011	113
OLLR	IL1DR	JSH011	112
RMDDL	RMDDR	JSH011	112
RIS	AVER	JSH011	111
RIBL	RIS	JSH011	110
IL2L	RMER	JSH011	107
IL2DL	CEPDL	JSH011	106
IL2VR	CEPVR	JSH011	103
RIBL	SMDDR	JSH011	103
RMEV	RIH	JSH011	103
URYDL	OLLL	JSH011	102
URYDL	IL2DL	JSH011	100
IL2DL	OLQDL	JSH011	99
RMEV	OLLL	JSH011	97
IL1DR	URYDR	JSH011	97
IL1R	RMEV	JSH011	96
URBL	IL2L	JSH011	95
URYDL	RMDVL	JSH011	95
RMEV	IL2DR	JSH011	94
URADR	RIH	JSH011	92
OLLL	IL1L	JSH011	89
RIH	IL2DR	JSH011	88
URADR	IL2R	JSH011	87
URYDL	OLLL	JSH011	84
IL2DR	IL1DR	JSH011	83
OLLL	SMDDR	JSH011	82
OLQDR	IL1DR	JSH011	81
RIH	RMED	JSH011	80
AVER	SMDDR	JSH011	78
URBL	IL1L	JSH011	78
URADL	CEPDL	JSH011	74
URXR	RIH	JSH011	72
IL1L	IL2L	JSH011	71
AVER	RMER	JSH011	70
RIBL	RIS	JSH011	64
IL1R	IL2DR	JSH011	64
RIBL	RIS	JSH011	64
CEPDR	RIH	JSH011	63
IL1DR	URYDR	JSH011	61
OLLL	IL2L	JSH011	61
URYDL	SMDDR	JSH011	61
IL1R	RIPR	JSH011	60
URYDL	OLQDL	JSH011	60
RIBL	OLLL	JSH011	59
IL2DR	IL1DR	JSH011	59
IL2DL	IL1DL	JSH011	58
IL1L	RMDDR	JSH011	58
RMEV	RMED	JSH011	57
IL2VL	CEPVL	JSH011	56
IL1L	IL2L	JSH011	56
URYDL	URADL	JSH011	53
URYDL	OLLL	JSH011	52
CEPDR	URYDR	JSH011	52
IL1DL	RMDDR	JSH011	52
OLLL	SMDVL	JSH011	51
OLLL	SMDDR	JSH011	51
URYDR	RMED	JSH011	51
RMEV	OLLR	JSH011	50
IL1DR	URYDR	JSH011	50
URADL	IL1DL	JSH011	49
URYDL	IL1DL	JSH011	48
URADR	URYDR	JSH011	47
IL1DR	URYDR	JSH011	46
CEPDR	IL2DR	JSH011	42
URYDL	OLQDL	JSH011	40
IL1DL	OLQDL	JSH011	40
IL2DL	IL1DL	JSH011	40
RMDVL	IL1DL	JSH011	33
IL2DR	URYDR	JSH011	32
RMDVR	IL2DR	JSH011	31
URADL	IL2DL	JSH011	31
URADR	IL2DR	JSH011	28
URYDL	RIS	JSH011	25
RMDVL	IL1DL	JSH011	23
RIBL	OLQDL	JSH011	20
OLLR	SMDVR	JSH011	20
RIH	IL2DR	JSH011	19
OLLR	IL2R	JSH011	18
URADR	IL1DR	JSH011	16
RIPL	RMDVL	JSH011	15
URADR	RIPR	JSH011	11
URADL	IL1DL	JSH011	4
CEPDL	RMDVL	JSH012	2005
RMDVL	IL1DL	JSH012	1782
RMDVR	URYDR	JSH012	1052
RMDVR	IL1DR	JSH012	982
URYDL	SMDDR	JSH012	798
RIPL	URADL	JSH012	726
RIBL	URYDL	JSH012	723
URADR	IL1R	JSH012	656
CEPDL	SMDDR	JSH012	621
RIH	OLQVL	JSH012	617
RIBL	URYDL	JSH012	608
RIPL	IL1DL	JSH012	581
RMEV	RMDDR	JSH012	568
RIBL	RMER	JSH012	551
OLLL	RMER	JSH012	529
CEPDL	RIS	JSH012	528
IL2L	RMEL	JSH012	525
IL1L	RMDDR	JSH012	507
RMDVL	RMDDR	JSH012	495
OLQVL	IL2L	JSH012	470
RIS	RMER	JSH012	452
RMDDL	RMDDR	JSH012	434
RMDVR	IL1DR	JSH012	411
RIH	OLQDR	JSH012	409
RIBL	AVER	JSH012	395
OLLL	AVER	JSH012	393
OLQDR	RMED	JSH012	393
URYDL	SMDDR	JSH012	390
RMDVL	RMDDR	JSH012	385
IL2R	OLQDR	JSH012	374
RMEV	SMDVR	JSH012	349
IL1DL	OLQDL	JSH012	340
RMEV	SMDVL	JSH012	336
CEPDL	AVER	JSH012	325
CEPDL	URYDL	JSH012	303
RMDDL	URYDR	JSH012	298
OLLR	OLLL	JSH012	283
URYDL	AVER	JSH012	279
CEPDL	OLLL	JSH012	275
OLQDR	URYDR	JSH012	272
IL2DR	RIPR	JSH012	271
RIPL	RIH	JSH012	270
RMEV	IL2L	JSH012	270
OLLL	AVER	JSH012	267
RMDVR	URYDR	JSH012	266
OLLL	RMER	JSH012	259
CEPDL	URYDL	JSH012	258
OLLL	SMDDR	JSH012	252
CEPDL	OLLL	JSH012	239
RMDVR	RMDDL	JSH012	238
IL1DR	URYDR	JSH012	236
URADR	RMEL	JSH012	234
OLLL	IL1L	JSH012	234
IL1DR	URYDR	JSH012	231
URYDL	RMDDR	JSH012	230
RIH	OLQDR	JSH012	228
RMDVL	IL1L	JSH012	226
RIH	URYDR	JSH012	220
RIH	IL2L	JSH012	215
OLLL	RMDVL	JSH012	215
RMDVL	IL1L	JSH012	214
CEPDL	OLLL	JSH012	213
RMER	RMED	JSH012	207
IL2R	RMER	JSH012	207
IL1L	RMER	JSH012	199
URYDL	RMDVL	JSH012	198
URYDL	RMED	JSH012	197
OLLL	SMDDR	JSH012	194
RIPL	IL2DL	JSH012	191
RMEV	RIPR	JSH012	182
RIS	SMDDR	JSH012	180
RIH	URYDR	JSH012	174
RMEV	OLLR	JSH012	174
RMEV	IL2DR	JSH012	170
URXL	URYDL	JSH012	165
RMEV	RIH	JSH012	162
RMEL	RMER	JSH012	161
IL2DR	RMED	JSH012	159
SMDVL	SMDDR	JSH012	155
RIBL	OLLL	JSH012	152
CEPDL	URYDL	JSH012	147
URYDL	RIS	JSH012	146
IL1DR	SMDVR	JSH012	144
RMDR	AVER	JSH012	142
RIH	RMED	JSH012	138
URYDR	RMED	JSH012	135
URADR	RMER	JSH012	132
RIH	OLQDR	JSH012	131
IL1L	RMED	JSH012	130
URBL	OLLL	JSH012	126
URBL	IL2L	JSH012	125
IL2DR	RMER	JSH012	124
CEPDR	URXR	JSH012	122
IL2R	RIH	JSH012	122
RIS	RMDR	JSH012	121
RIBL	RIS	JSH012	119
URYDL	IL2DL	JSH012	119
OLLL	IL2L	JSH012	118
IL1L	RMDDR	JSH012	115
URYDL	IL1DL	JSH012	114
CEPDL	URXL	JSH012	114
RMEV	RMED	JSH012	113
IL1L	IL2L	JSH012	111
RMEV	URADR	JSH012	110
URADR	RIH	JSH012	110
RIS	AVER	JSH012	109
IL2L	RMED	JSH012	108
CEPDL	IL2DL	JSH012	103
URADR	IL2R	JSH012	101
RIBL	RMDR	JSH012	98
URBL	IL1L	JSH012	97
RIBL	RIS	JSH012	96
IL2R	IL2DR	JSH012	96
RIS	AVER	JSH012	95
RMDDL	RMED	JSH012	94
AVER	SMDDR	JSH012	94
URYDL	RMDVL	JSH012	93
OLLR	IL1DR	JSH012	92
IL1L	IL2L	JSH012	92
URXR	RIH	JSH012	91
CEPDL	URADL	JSH012	90
IL2DL	IL1DL	JSH012	89
RMDVL	RMED	JSH012	88
RMDDL	RMDDR	JSH012	86
URADL	IL1DL	JSH012	80
RIBL	SMDDR	JSH012	78
IL2DR	IL1DR	JSH012	77
IL2VR	CEPVR	JSH012	76
URYDL	OLQDL	JSH012	76
RMEV	IL1R	JSH012	76
IL2R	RIH	JSH012	73
URADR	IL2DR	JSH012	71
URYDL	IL1DL	JSH012	65
RMDVL	RMDDR	JSH012	63
CEPDR	IL2DR	JSH012	62
URYDL	OLLL	JSH012	60
RIH	IL2DR	JSH012	60
IL1DL	OLQDL	JSH012	60
AVER	SMDDR	JSH012	58
IL2DR	IL1DR	JSH012	57
IL2DL	OLQDL	JSH012	57
RMDVR	OLQDR	JSH012	54
RIBL	OLLL	JSH012	53
OLLL	SMDDR	JSH012	53
URYDL	URADL	JSH012	52
RIBL	RIS	JSH012	51
IL2DR	RMEL	JSH012	50
URADL	IL2DL	JSH012	50
RMEV	RMDDL	JSH012	47
CEPDR	RIH	JSH012	47
CEPDR	URYDR	JSH012	46
RIBL	RIS	JSH012	42
RMEV	URYDR	JSH012	42
IL2DL	IL1DL	JSH012	42
RMDVL	IL1L	JSH012	40
OLLL	SMDDR	JSH012	39
URADR	IL2DR	JSH012	39
IL1DR	URYDR	JSH012	39
OLQDR	IL1DR	JSH012	37
URADR	IL1DR	JSH012	37
URADR	RIPR	JSH012	36
URYDR	RMED	JSH012	34
IL2VL	CEPVL	JSH012	32
IL2DR	URYDR	JSH012	30
RMEV	IL1DR	JSH012	24
CEPDL	IL1L	JSH012	24
URYDL	OLQDL	JSH012	20
OLLR	IL2R	JSH012	20
RIH	IL2DR	JSH012	20
RMED	RMDDR	JSH012	17
URADR	URYDR	JSH012	16
IL1DR	URYDR	JSH012	12
IL1R	RIPR	JSH012	9
RIBL	OLQDL	JSH012	8
URADR	IL2DR	JSH012	4
CEPDL	RMDVL	JSH013	2002
RMDVL	IL1DL	JSH013	1669
RMDVR	URYDR	JSH013	1145
CEPDL	SMDDR	JSH013	1020
RMDVR	IL1DR	JSH013	862
IL2L	RMEL	JSH013	731
RIPL	URADL	JSH013	724
URADR	IL1R	JSH013	700
OLLL	RMER	JSH013	676
URYDL	SMDDR	JSH013	675
RIBL	URYDL	JSH013	622
RIPL	IL1DL	JSH013	613
RIH	OLQVL	JSH013	613
CEPDL	RIS	JSH013	604
RIBL	RMER	JSH013	566
RIS	SMDDR	JSH013	543
RMDVL	RMDDR	JSH013	540
OLQDR	RMED	JSH013	534
IL1L	RMDDR	JSH013	514
AVER	SMDDR	JSH013	479
RIS	RMER	JSH013	458
OLQVL	IL2L	JSH013	450
RMDVR	RMDDL	JSH013	411
RMEV	SMDVL	JSH013	401
RIBL	AVER	JSH013	394
RMDVR	IL1DR	JSH013	391
IL2DR	RIPR	JSH013	389
URYDL	SMDDR	JSH013	386
OLLL	IL1L	JSH013	385
OLQDR	URYDR	JSH013	379
OLLL	AVER	JSH013	373
IL2R	OLQDR	JSH013	371
RMDVL	RMDDR	JSH013	352
URADR	RIPR	JSH013	345
OLLL	SMDDR	JSH013	334
RMDDL	RMDDR	JSH013	330
RIBL	CEPDL	JSH013	324
RMEV	IL2L	JSH013	321
CEPDL	AVER	JSH013	321
RMEV	RMDDR	JSH013	307
IL1DR	URYDR	JSH013	301
RIBL	URYDL	JSH013	298
CEPDL	OLLL	JSH013	297
IL1DR	URYDR	JSH013	297
CEPDL	URYDL	JSH013	294
OLLL	RMER	JSH013	286
RMDVL	IL1L	JSH013	276
SMDVL	SMDDR	JSH013	274
IL2R	RMER	JSH013	274
RIPL	RIH	JSH013	273
OLLL	SMDDR	JSH013	272
OLLL	RMDVL	JSH013	269
IL1DL	OLQDL	JSH013	266
RMDVL	RMED	JSH013	264
RMEV	SMDVR	JSH013	259
RMEV	RMDDR	JSH013	248
RMDVL	IL1L	JSH013	245
URADR	RMEL	JSH013	224
CEPDL	OLLL	JSH013	220
RIH	IL2L	JSH013	219
RIH	OLQDR	JSH013	219
RIH	URYDR	JSH013	205
RMDR	AVER	JSH013	200
OLLR	OLLL	JSH013	199
RMDVL	RMDDR	JSH013	198
RMEV	OLLR	JSH013	197
OLLL	AVER	JSH013	196
RIBL	RIS	JSH013	196
URYDL	RMED	JSH013	192
RIPL	IL2DL	JSH013	183
RIH	URYDR	JSH013	181
RMEL	RMER	JSH013	176
OLLR	SMDVR	JSH013	175
RMED	RMDDR	JSH013	161
RIH	OLQDR	JSH013	161
OLQDR	IL2DR	JSH013	150
RIBL	OLLL	JSH013	149
URADR	RMER	JSH013	145
RIS	RMDR	JSH013	142
URYDL	IL1DL	JSH013	141
RMDDL	URYDR	JSH013	139
RMEV	RIPR	JSH013	133
RMDVR	URYDR	JSH013	131
IL1L	IL2L	JSH013	125
URXL	URYDL	JSH013	124
RMEV	IL2DR	JSH013	124
IL2L	RMED	JSH013	123
RIBL	RMDR	JSH013	122
RMDDL	RMED	JSH013	120
IL1DR	RIPR	JSH013	118
CEPDL	IL2DL	JSH013	113
URBL	OLLL	JSH013	109
CEPDL	URXL	JSH013	109
RMER	RMED	JSH013	108
URYDL	RMDDR	JSH013	107
IL2DL	IL1DL	JSH013	105
IL2DR	RMED	JSH013	105
OLLR	IL1DR	JSH013	99
URBL	IL2L	JSH013	97
CEPDL	URYDL	JSH013	97
IL1DR	URYDR	JSH013	95
URADR	IL2DR	JSH013	94
IL1L	IL2L	JSH013	88
URBL	IL1L	JSH013	88
RMEV	RMED	JSH013	84
URYDL	IL2DL	JSH013	82
OLLL	IL2L	JSH013	82
RIBL	RIS	JSH013	81
URYDL	RIS	JSH013	81
CEPDL	IL1L	JSH013	79
OLQDR	IL1DR	JSH013	77
CEPDR	URYDR	JSH013	77
CEPDR	URXR	JSH013	75
CEPDR	IL2DR	JSH013	75
IL2R	IL2DR	JSH013	74
RMEV	IL2R	JSH013	74
CEPDL	URADL	JSH013	74
URADR	IL2R	JSH013	72
URYDR	RMED	JSH013	72
RMDVR	OLQDR	JSH013	72
IL2DR	IL1DR	JSH013	72
IL2VR	CEPVR	JSH013	71
URADR	IL1DR	JSH013	69
URXR	RIH	JSH013	69
CEPDL	RMDR	JSH013	68
URYDL	OLLL	JSH013	65
IL2DR	RMER	JSH013	65
IL2DL	OLQDL	JSH013	64
AVER	RMER	JSH013	61
URYDL	OLQDL	JSH013	58
IL2DR	URYDR	JSH013	58
URYDL	URADL	JSH013	57
RMEV	URADR	JSH013	57
RMDVL	IL1L	JSH013	53
CEPDR	RIH	JSH013	53
IL2DR	RMEL	JSH013	53
CEPDL	OLLL	JSH013	52
OLLL	SMDDR	JSH013	52
URADL	IL1DL	JSH013	49
URADR	URYDR	JSH013	48
RIBL	RIS	JSH013	47
URADR	IL2DR	JSH013	44
URADL	IL2DL	JSH013	44
IL1DL	OLQDL	JSH013	44
IL2DL	IL1DL	JSH013	44
URYDL	RMDVL	JSH013	43
OLQDR	IL1DR	JSH013	37
OLLR	IL2R	JSH013	30
RIBL	SMDDR	JSH013	25
URYDL	OLQDL	JSH013	25
RMEV	IL2DR	JSH013	24
IL2DR	IL1DR	JSH013	24
URYDL	RMDVL	JSH013	22
IL1DR	URYDR	JSH013	10
IL2L	RMER	JSH013	8
CEPDL	RMDVL	JSH014	2240
RMDVL	IL1DL	JSH014	1431
CEPDL	SMDDR	JSH014	1038
RMDVR	URYDR	JSH014	964
RIAL	RMDVL	JSH014	856
RMDVR	IL1DR	JSH014	786
RIPL	URADL	JSH014	742
IL1R	URADR	JSH014	709
IL2L	RMEL	JSH014	701
OLLL	RMER	JSH014	699
RIH	OLQVL	JSH014	640
CEPDL	RIS	JSH014	617
RMDDR	RMDVL	JSH014	590
IL1DR	URYDR	JSH014	588
RIPL	IL1DL	JSH014	553
RIS	RMER	JSH014	534
OLLL	IL1L	JSH014	508
RIBL	RMER	JSH014	503
RIS	SMDDR	JSH014	501
URYDL	SMDDR	JSH014	499
RMDVR	IL1DR	JSH014	476
OLQVL	IL2L	JSH014	463
CEPDL	URYDL	JSH014	434
RMEV	SMDVL	JSH014	431
AVER	SMDDR	JSH014	426
RMDVR	RMDDL	JSH014	426
URADR	RIPR	JSH014	425
RIBL	AVER	JSH014	421
IL2R	OLQDR	JSH014	403
URYDL	SMDDR	JSH014	393
RMDDR	IL1L	JSH014	393
IL2R	RMER	JSH014	373
RMEV	RMDDR	JSH014	369
IL2DR	RIPR	JSH014	368
OLQDR	RMED	JSH014	355
RMER	RMED	JSH014	319
RMDVL	IL1L	JSH014	317
SMDVL	SMDDR	JSH014	316
CEPDL	OLLL	JSH014	303
OLLL	AVER	JSH014	303
RMDDR	RMDVL	JSH014	294
URADR	RMEL	JSH014	288
OLLL	SMDDR	JSH014	284
OLLL	SMDDR	JSH014	283
RIBL	URYDL	JSH014	274
RIH	OLQDR	JSH014	269
IL1DR	URYDR	JSH014	260
CEPDL	AVER	JSH014	253
RMEV	SMDVR	JSH014	253
OLLL	RMER	JSH014	252
RMEV	IL2L	JSH014	246
OLQVR	IL1DL	JSH014	245
URYDL	SMDDR	JSH014	242
RIBL	URYDL	JSH014	241
CEPDL	OLLL	JSH014	240
RIBL	OLLL	JSH014	236
OLLL	OLLR	JSH014	236
RMDVL	RMED	JSH014	235
RIH	IL2L	JSH014	233
OLLL	RMDVL	JSH014	232
IL1DR	RIPR	JSH014	231
OLLL	AVER	JSH014	230
SMDVR	OLLR	JSH014	225
RMDDR	RMDDL	JSH014	222
RMDDR	RMDVL	JSH014	222
RIH	URYDR	JSH014	221
OLQDR	URYDR	JSH014	221
RMEL	RMER	JSH014	206
RMDR	AVER	JSH014	206
RIPL	RIH	JSH014	204
RMDVL	IL1L	JSH014	201
RIPL	IL2DL	JSH014	190
OLQDR	IL2DR	JSH014	182
RIS	RMDR	JSH014	177
RMDDL	URYDR	JSH014	173
RMEV	OLLR	JSH014	167
CEPDL	URXL	JSH014	166
RIBL	RIS	JSH014	163
RMDDL	RMED	JSH014	158
RIH	OLQDR	JSH014	152
OLQDR	URYDR	JSH014	145
RIBL	SMDDR	JSH014	145
IL2L	RMED	JSH014	142
URYDL	RMDDR	JSH014	139
RMDDR	RMED	JSH014	136
CEPDL	OLLL	JSH014	135
RIH	URYDR	JSH014	135
URYDL	IL2DL	JSH014	134
CEPDL	RMDR	JSH014	123
CEPDL	IL2DL	JSH014	122
RMEV	RMER	JSH014	121
URXL	URYDL	JSH014	120
RMEV	URADR	JSH014	119
CEPDL	URYDL	JSH014	118
SMDVR	SMDDL	JSH014	117
AVER	RMER	JSH014	114
RIBL	RMDR	JSH014	113
IL2DR	URADR	JSH014	113
CEPDR	URXR	JSH014	113
IL2R	RMED	JSH014	111
URBL	OLLL	JSH014	111
URADR	RMER	JSH014	106
IL2R	URADR	JSH014	104
URYDR	RMED	JSH014	104
URYDL	RMED	JSH014	101
RMEV	IL2DR	JSH014	100
IL1L	IL2L	JSH014	100
URBL	IL1L	JSH014	96
RIBL	SMDDR	JSH014	96
IL1DR	OLLR	JSH014	95
IL2R	IL2DR	JSH014	95
URBL	IL2L	JSH014	92
SMDDL	OLLR	JSH014	91
IL2VR	CEPVR	JSH014	90
RMEV	RMED	JSH014	88
IL1DR	URYDR	JSH014	87
OLQVR	IL2DL	JSH014	83
IL1L	IL2L	JSH014	82
OLLL	AVER	JSH014	79
RMEV	IL2R	JSH014	79
OLLL	SMDDR	JSH014	78
CEPDL	URADL	JSH014	77
URXR	RIH	JSH014	72
IL1DR	URADR	JSH014	71
URYDL	RIS	JSH014	71
URYDL	URADL	JSH014	70
OLLL	RMED	JSH014	70
CEPDR	IL2DR	JSH014	69
SMDDL	URYDR	JSH014	68
URYDL	OLLL	JSH014	62
IL2DR	IL1DR	JSH014	61
CEPDL	SMDDR	JSH014	60
IL1R	RIPR	JSH014	59
IL2DR	URADR	JSH014	59
URYDL	IL1DL	JSH014	58
IL2R	RMEL	JSH014	58
RIBL	SMDDR	JSH014	57
RIBL	RIS	JSH014	55
IL2R	OLLR	JSH014	54
URADR	URYDR	JSH014	54
URYDL	OLQVR	JSH014	54
CEPDL	AVER	JSH014	53
URADL	IL1DL	JSH014	53
CEPDR	RIH	JSH014	52
CEPDR	URADR	JSH014	52
RMDVR	OLQDR	JSH014	52
OLQDR	IL1DR	JSH014	50
OLLL	IL2L	JSH014	48
OLQVR	IL1DL	JSH014	46
URYDL	RMDVL	JSH014	42
CEPDL	IL1L	JSH014	40
CEPDR	URYDR	JSH014	40
RIBL	RIS	JSH014	39
URADL	IL2DL	JSH014	39
OLQDR	IL1DR	JSH014	38
URYDL	IL1DL	JSH014	36
IL2DR	URYDR	JSH014	35
IL2DR	IL1DR	JSH014	34
IL2DR	RMEL	JSH014	33
RMDDR	IL1L	JSH014	32
IL2DL	IL1DL	JSH014	31
IL2DR	RMER	JSH014	29
RMDVR	URYDR	JSH014	25
IL2DL	IL1DL	JSH014	23
RMEV	RIH	JSH014	20
OLQDR	RMED	JSH014	14
RIAL	IL1DL	JSH014	10
IL1DR	URYDR	JSH014	10
URADL	IL1DL	JSH014	4
RIAL	RMDVL	JSH015	2886
RMDVL	CEPDL	JSH015	2258
RMDVL	IL1DL	JSH015	1521
SMDDR	CEPDL	JSH015	1035
RIS	SMDDR	JSH015	757
OLLL	RMER	JSH015	725
RIS	CEPDL	JSH015	705
RIPL	URADL	JSH015	681
IL2L	RMEL	JSH015	628
RIH	OLQVL	JSH015	622
RIPL	IL1DL	JSH015	488
OLQVL	IL2L	JSH015	481
RIBL	RMER	JSH015	458
OLLL	RMDVL	JSH015	454
RMDDR	RMDVL	JSH015	447
RMER	RMED	JSH015	441
RIS	RMER	JSH015	440
RMEV	SMDVL	JSH015	404
RMDVL	IL1L	JSH015	372
OLLL	AVER	JSH015	353
RMEV	SMDVR	JSH015	348
RIBL	SMDDR	JSH015	335
RIBL	AVER	JSH015	334
RMDVL	IL1L	JSH015	325
SMDVL	SMDDR	JSH015	313
OLQDL	IL1DL	JSH015	309
OLLL	SMDDR	JSH015	286
AVER	CEPDL	JSH015	282
OLLL	IL1L	JSH015	280
AVER	SMDDR	JSH015	274
RIAL	IL1DL	JSH015	269
OLLL	AVER	JSH015	253
RIBL	SMDDR	JSH015	252
RIS	RMDR	JSH015	248
OLLL	CEPDL	JSH015	244
IL2L	RMER	JSH015	237
IL1DR	URYDR	JSH015	229
RMDDR	IL1L	JSH015	223
RMEV	RMER	JSH015	220
RMEV	OLLR	JSH015	215
OLLL	RMER	JSH015	214
RMDDR	RMDVL	JSH015	212
URXL	URYDL	JSH015	198
RIBL	RIS	JSH015	197
RMDR	AVER	JSH015	193
SMDDR	CEPDL	JSH015	191
RMEV	IL2L	JSH015	179
RMDDL	RMED	JSH015	178
RIBL	OLLL	JSH015	169
RMDR	CEPDL	JSH015	162
RIPL	RIH	JSH015	161
IL2L	RMED	JSH015	161
RIBL	RMDR	JSH015	160
RMDDR	RMED	JSH015	159
RIBL	URYDL	JSH015	157
RMDVL	IL1DL	JSH015	153
OLLR	SMDVR	JSH015	153
RMEV	RMDDR	JSH015	148
RMEV	RMDDR	JSH015	147
URYDL	SMDDR	JSH015	146
RMDDR	RMDVL	JSH015	144
RIPL	IL2DL	JSH015	142
URXL	CEPDL	JSH015	132
SMDDL	SMDVR	JSH015	132
RMDDR	RMDVL	JSH015	130
RIH	IL2L	JSH015	126
OLQDR	IL2DR	JSH015	122
RIBL	SMDDR	JSH015	121
RMDVL	RMED	JSH015	120
URYDL	CEPDL	JSH015	120
OLQDL	IL2DL	JSH015	117
RMDDL	URYDR	JSH015	109
URBL	OLLL	JSH015	107
OLLR	URYDR	JSH015	106
RMEV	RMED	JSH015	105
IL2DL	CEPDL	JSH015	102
URBL	IL1L	JSH015	98
URYDL	CEPDL	JSH015	97
URYDR	RMED	JSH015	96
IL1L	IL2L	JSH015	93
RIBL	RIS	JSH015	92
SMDDL	OLLR	JSH015	91
OLLL	CEPDL	JSH015	91
RIBL	SMDDR	JSH015	90
IL1L	IL2L	JSH015	87
IL1DR	OLLR	JSH015	85
URYDL	RMDDR	JSH015	82
IL2DL	IL1DL	JSH015	79
URBL	IL2L	JSH015	74
RMDDR	CEPDL	JSH015	72
IL1L	CEPDL	JSH015	69
AVER	CEPDL	JSH015	65
URYDL	SMDDR	JSH015	63
URYDL	OLLL	JSH015	63
URADL	IL2DL	JSH015	63
OLLL	IL2L	JSH015	63
URYDL	URADL	JSH015	63
URADL	CEPDL	JSH015	62
URYDL	RMED	JSH015	59
URYDL	IL1DL	JSH015	58
RMDDR	RIAL	JSH015	58
RIBL	RMEV	JSH015	56
RIBL	URYDL	JSH015	51
OLQVL	RMER	JSH015	49
OLQDL	IL1DL	JSH015	44
OLLL	SMDDR	JSH015	42
URADL	IL1DL	JSH015	41
URYDL	OLQDL	JSH015	34
RIBL	RIS	JSH015	29
IL2DL	IL1DL	JSH015	22
OLQDR	IL1DR	JSH015	18
RIH	RMER	JSH015	14
URADL	IL1DL	JSH015	12
RIBL	SMDVL	JSH015	11
OLLL	RMED	JSH015	3
SMDDL	URYDR	JSH015	2
RMDVR	URYDR	JSH016	1754
CEPDL	RMDVL	JSH016	1615
RMDVL	IL1DL	JSH016	1269
RMDVR	IL1DR	JSH016	1154
RIAL	RMDVL	JSH016	917
RIBL	SMDDR	JSH016	885
RIAL	RMDVL	JSH016	779
CEPDL	RIS	JSH016	704
IL2L	RMEL	JSH016	686
URADR	IL1R	JSH016	681
RIPL	URADL	JSH016	673
RIS	SMDDR	JSH016	666
OLLL	RMER	JSH016	659
RIH	OLQVL	JSH016	627
RIBL	URYDL	JSH016	593
RIS	RMER	JSH016	587
RIH	RIPR	JSH016	576
OLQDR	RMED	JSH016	539
OLQVL	IL2L	JSH016	531
OLLL	RMDVL	JSH016	516
RMDVR	RMDDL	JSH016	507
RIBL	RMER	JSH016	484
AVER	SMDDR	JSH016	476
RIH	OLQDR	JSH016	458
RMDVR	IL1DR	JSH016	450
RMDDR	RMDVL	JSH016	432
RMDVL	IL1L	JSH016	413
RMEV	SMDVL	JSH016	412
RIPL	IL1DL	JSH016	408
IL2R	RMER	JSH016	405
URADR	RIPR	JSH016	396
SMDVL	SMDDR	JSH016	390
RIBL	AVER	JSH016	383
RIAL	SMDDR	JSH016	358
IL2R	OLQDR	JSH016	349
RIAL	RMDVL	JSH016	349
RMDVL	IL1L	JSH016	348
OLLL	IL1L	JSH016	348
CEPDL	SMDDR	JSH016	340
RMEV	URADR	JSH016	314
IL2DR	RIPR	JSH016	313
OLLL	SMDDR	JSH016	306
RMEV	SMDVR	JSH016	306
IL1DL	OLQDL	JSH016	290
OLLL	AVER	JSH016	283
RMDDR	RMDVL	JSH016	279
IL2R	RMED	JSH016	279
RMER	RMED	JSH016	272
CEPDL	RMDVL	JSH016	269
URADR	RMEL	JSH016	265
OLLL	AVER	JSH016	264
RIPL	RIH	JSH016	249
CEPDL	SMDDR	JSH016	246
RMEV	RMER	JSH016	245
RMDDR	IL1L	JSH016	241
OLQDR	URYDR	JSH016	240
IL2L	RMED	JSH016	239
URADR	IL2R	JSH016	237
OLLL	RMER	JSH016	237
CEPDL	OLLL	JSH016	236
RIS	RMDR	JSH016	234
RMEV	IL2R	JSH016	228
OLQDR	IL1DR	JSH016	210
URADR	RMED	JSH016	208
CEPDL	AVER	JSH016	203
RMDDR	RIAL	JSH016	201
IL2R	RIH	JSH016	200
OLQDR	IL2DR	JSH016	200
RIH	URYDR	JSH016	196
RMDDR	RMDVL	JSH016	196
SMDVR	OLLR	JSH016	187
URXL	URYDL	JSH016	187
[truncated: 131,683 more rows]
