# Supplementary material for: Exploring neurodevelopment via spatiotemporal collation of anatomical networks with NeuroSC
Source: eLife. 2025 Oct 21;13:RP103977. doi: 10.7554/eLife.103977 (PMC12539806; doi:10.7554/eLife.103977)
Supplement: Supplementary file 13. — Type the name of a ‘Neuron of Interest’ (NOI) in the indicated cell to filter for the summed adjacency counts for each contact partner. For each partner, there are two columns: Total number of contacts (number of EM sections NOI and partner are in contact) and Total Weights (summed number of pixels NOI and partner contacts). [file elife-103977-supp13.xlsx]

## Sheet: 2018_11_06_Adjacency_N2U_NCB_fr
Neuron1	Neuron2	Section	Weight				Partner	# of contacts	Total Weights			Partner	# of contacts for XXX-L	Total Weights for XXX-L	# of contacts for XXX-R	Total Weights for XXX-R
RIPL	RIPR	N2U_002	633		Write your NOI here		ADAL	0	0	Write your NOI here		ADAL	0	0	0	0
RIPL	RIPR	N2U_002	536				ADAR	0	0			ADAR	0	0	0	0
CEPDL	URXL	N2U_002	362				ADEL	0	0			ADEL	0	0	0	0
IL2DR	CEPDR	N2U_002	245				ADER	0	0			ADER	0	0	0	0
URBR	IL1R	N2U_002	244				ADFL	0	0	Write your NOI hereL		ADFL	0	0	0	0
URADR	IL2DR	N2U_002	237				ADFR	0	0	Write your NOI hereR		ADFR	0	0	0	0
CEPDR	URXR	N2U_002	212				ADLL	0	0			ADLL	0	0	0	0
URADR	CEPDR	N2U_002	209				ADLR	0	0			ADLR	0	0	0	0
CEPDR	RIPR	N2U_002	204				AFDL	0	0			AFDL	0	0	0	0
RIPL	CEPDR	N2U_002	197				AFDR	0	0			AFDR	0	0	0	0
RIPL	RIH	N2U_002	163				AIAL	0	0			AIAL	0	0	0	0
CEPDL	IL2DL	N2U_002	148				AIAR	0	0			AIAR	0	0	0	0
URADR	IL1DR	N2U_002	113				AIBL	0	0			AIBL	0	0	0	0
URYDR	IL1DR	N2U_002	108				AIBR	0	0			AIBR	0	0	0	0
IL2DR	IL1DR	N2U_002	92				AIML	0	0			AIML	0	0	0	0
URADL	IL2DL	N2U_002	92				AIMR	0	0			AIMR	0	0	0	0
BAGL	RIPR	N2U_002	66				AINL	0	0			AINL	0	0	0	0
IL2DL	URXL	N2U_002	55				AINR	0	0			AINR	0	0	0	0
RIPL	URXR	N2U_002	54				AIYL	0	0			AIYL	0	0	0	0
OLLR	IL1R	N2U_002	51				AIYR	0	0			AIYR	0	0	0	0
IL2VL	URAVL	N2U_002	35				AIZL	0	0			AIZL	0	0	0	0
RIPL	RIPR	N2U_003	792				AIZR	0	0			AIZR	0	0	0	0
RIPL	RIPR	N2U_003	524				ALA	0	0			ALA	0	0	0	0
CEPDL	IL1DL	N2U_003	325				ALML	0	0			ALML	0	0	0	0
CEPDL	URXL	N2U_003	278				ALMR	0	0			ALMR	0	0	0	0
CEPDR	URXR	N2U_003	274				ALNL	0	0			ALNL	0	0	0	0
URBR	IL1R	N2U_003	224				ALNR	0	0			ALNR	0	0	0	0
URADL	IL1DL	N2U_003	222				AQR	0	0			AQR	0	0	0	0
CEPDR	URADR	N2U_003	191				ASEL	0	0			ASEL	0	0	0	0
IL2DL	CEPDL	N2U_003	180				ASER	0	0			ASER	0	0	0	0
IL2DR	URADR	N2U_003	162				ASGL	0	0			ASGL	0	0	0	0
IL2DL	URXL	N2U_003	154				ASGR	0	0			ASGR	0	0	0	0
IL1DR	URYDR	N2U_003	149				ASHL	0	0			ASHL	0	0	0	0
IL2DR	CEPDR	N2U_003	142				ASHR	0	0			ASHR	0	0	0	0
IL1DR	URADR	N2U_003	142				ASIL	0	0			ASIL	0	0	0	0
IL2DL	IL1DL	N2U_003	123				ASIR	0	0			ASIR	0	0	0	0
IL2DR	IL1DR	N2U_003	119				ASJL	0	0			ASJL	0	0	0	0
IL1DL	RIPR	N2U_003	114				ASJR	0	0			ASJR	0	0	0	0
CEPDR	RIPR	N2U_003	103				ASKL	0	0			ASKL	0	0	0	0
IL2DR	URXR	N2U_003	78				ASKR	0	0			ASKR	0	0	0	0
URYDR	URADR	N2U_003	60				AUAL	0	0			AUAL	0	0	0	0
BAGL	RIPR	N2U_003	56				AUAR	0	0			AUAR	0	0	0	0
IL2DL	URADL	N2U_003	44				AVAL	0	0			AVAL	0	0	0	0
IL1R	OLLR	N2U_003	17				AVAR	0	0			AVAR	0	0	0	0
RIPL	RIH	N2U_003	9				AVBL	0	0			AVBL	0	0	0	0
RIPL	RIH	N2U_004	680				AVBR	0	0			AVBR	0	0	0	0
RIPL	RIPR	N2U_004	496				AVDL	0	0			AVDL	0	0	0	0
CEPDL	URXL	N2U_004	362				AVDR	0	0			AVDR	0	0	0	0
CEPDL	IL1DL	N2U_004	332				AVEL	0	0			AVEL	0	0	0	0
IL2DR	CEPDR	N2U_004	326				AVER	0	0			AVER	0	0	0	0
CEPDR	URXR	N2U_004	314				AVFL	0	0			AVFL	0	0	0	0
URBR	IL1R	N2U_004	270				AVFR	0	0			AVFR	0	0	0	0
URADL	IL1DL	N2U_004	257				AVHL	0	0			AVHL	0	0	0	0
IL2DL	CEPDL	N2U_004	229				AVHR	0	0			AVHR	0	0	0	0
CEPDR	URADR	N2U_004	181				AVJL	0	0			AVJL	0	0	0	0
IL2DR	URADR	N2U_004	161				AVJR	0	0			AVJR	0	0	0	0
IL2DR	URXR	N2U_004	154				AVKL	0	0			AVKL	0	0	0	0
IL1DR	URADR	N2U_004	153				AVKR	0	0			AVKR	0	0	0	0
IL1DR	URYDR	N2U_004	148				AVL	0	0			AVL	0	0	0	0
IL1DL	RIPR	N2U_004	119				AVM	0	0			AVM	0	0	0	0
IL2DR	IL1DR	N2U_004	118				AWAL	0	0			AWAL	0	0	0	0
IL2DL	IL1DL	N2U_004	104				AWAR	0	0			AWAR	0	0	0	0
BAGL	RIPR	N2U_004	96				AWBL	0	0			AWBL	0	0	0	0
RMED	RIPR	N2U_004	93				AWBR	0	0			AWBR	0	0	0	0
URYDR	URADR	N2U_004	85				AWCL	0	0			AWCL	0	0	0	0
IL2DL	URADL	N2U_004	38				AWCR	0	0			AWCR	0	0	0	0
IL1R	OLLR	N2U_004	30				BAGL	0	0			BAGL	0	0	0	0
IL2DL	URXL	N2U_004	28				BAGR	0	0			BAGR	0	0	0	0
RIPL	RIH	N2U_005	802				BDUL	0	0			BDUL	0	0	0	0
RIPL	RIPR	N2U_005	566				BDUR	0	0			BDUR	0	0	0	0
CEPDR	RIH	N2U_005	356				CEPDL	0	0			CEPDL	0	0	0	0
CEPDL	URXL	N2U_005	351				CEPDR	0	0			CEPDR	0	0	0	0
CEPDL	IL1DL	N2U_005	300				CEPVL	0	0			CEPVL	0	0	0	0
URBR	IL1R	N2U_005	288				CEPVR	0	0			CEPVR	0	0	0	0
RMED	RIPL	N2U_005	230				DVA	0	0			DVA	0	0	0	0
CEPDR	URXR	N2U_005	225				DVC	0	0			DVC	0	0	0	0
URADL	IL1DL	N2U_005	223				FLPL	0	0			FLPL	0	0	0	0
IL2DL	CEPDL	N2U_005	209				FLPR	0	0			FLPR	0	0	0	0
URXR	RIH	N2U_005	207				HSNL	0	0			HSNL	0	0	0	0
RMED	RIPR	N2U_005	193				HSNR	0	0			HSNR	0	0	0	0
CEPDR	URADR	N2U_005	177				IL1DL	0	0			IL1DL	0	0	0	0
IL1DR	URADR	N2U_005	173				IL1DR	0	0			IL1DR	0	0	0	0
IL1DL	RIPR	N2U_005	166				IL1L	0	0			IL1L	0	0	0	0
IL1DR	URYDR	N2U_005	157				IL1R	0	0			IL1R	0	0	0	0
IL2DL	IL1DL	N2U_005	152				IL1VL	0	0			IL1VL	0	0	0	0
IL2DR	CEPDR	N2U_005	141				IL1VR	0	0			IL1VR	0	0	0	0
IL2DL	URXL	N2U_005	138				IL2DL	0	0			IL2DL	0	0	0	0
BAGL	RIPR	N2U_005	130				IL2DR	0	0			IL2DR	0	0	0	0
IL2DR	IL1DR	N2U_005	117				IL2L	0	0			IL2L	0	0	0	0
IL2DR	URXR	N2U_005	106				IL2R	0	0			IL2R	0	0	0	0
IL2DR	URADR	N2U_005	104				IL2VL	0	0			IL2VL	0	0	0	0
IL2DR	RIH	N2U_005	93				IL2VR	0	0			IL2VR	0	0	0	0
CEPDL	RIPR	N2U_005	93				OLLL	0	0			OLLL	0	0	0	0
IL2DL	URADL	N2U_005	72				OLLR	0	0			OLLR	0	0	0	0
URYDR	URADR	N2U_005	69				OLQDL	0	0			OLQDL	0	0	0	0
IL1R	OLLR	N2U_005	50				OLQDR	0	0			OLQDR	0	0	0	0
RIPL	RIPR	N2U_006	544				OLQVL	0	0			OLQVL	0	0	0	0
RIPL	RIH	N2U_006	499				OLQVR	0	0			OLQVR	0	0	0	0
RMED	RIH	N2U_006	499				PLNL	0	0			PLNL	0	0	0	0
URBR	IL1R	N2U_006	406				PLNR	0	0			PLNR	0	0	0	0
URXR	RIH	N2U_006	362				PVCL	0	0			PVCL	0	0	0	0
CEPDL	IL1DL	N2U_006	360				PVCR	0	0			PVCR	0	0	0	0
CEPDR	RIH	N2U_006	300				PVNL	0	0			PVNL	0	0	0	0
CEPDL	URXL	N2U_006	275				PVNR	0	0			PVNR	0	0	0	0
IL2DL	IL1DL	N2U_006	246				PVPL	0	0			PVPL	0	0	0	0
IL2DL	CEPDL	N2U_006	232				PVPR	0	0			PVPR	0	0	0	0
RIPL	RIH	N2U_006	211				PVQL	0	0			PVQL	0	0	0	0
CEPDR	URXR	N2U_006	211				PVQR	0	0			PVQR	0	0	0	0
CEPDL	RIPR	N2U_006	203				PVR	0	0			PVR	0	0	0	0
URADL	IL1DL	N2U_006	190				PVT	0	0			PVT	0	0	0	0
IL1DR	URADR	N2U_006	190				RIAL	0	0			RIAL	0	0	0	0
IL2DL	URXL	N2U_006	188				RIAR	0	0			RIAR	0	0	0	0
IL2DR	RIH	N2U_006	184				RIBL	0	0			RIBL	0	0	0	0
CEPDR	URADR	N2U_006	175				RIBR	0	0			RIBR	0	0	0	0
IL1DR	URYDR	N2U_006	142				RICL	0	0			RICL	0	0	0	0
IL2DL	URADL	N2U_006	138				RICR	0	0			RICR	0	0	0	0
IL1DL	RIPR	N2U_006	125				RID	0	0			RID	0	0	0	0
RMED	RIPR	N2U_006	122				RIFL	0	0			RIFL	0	0	0	0
IL2DR	IL1DR	N2U_006	120				RIFR	0	0			RIFR	0	0	0	0
IL2DR	CEPDR	N2U_006	102				RIGL	0	0			RIGL	0	0	0	0
URAVR	IL2VR	N2U_006	99				RIGR	0	0			RIGR	0	0	0	0
URYDR	URADR	N2U_006	92				RIH	0	0			RIH	0	0	0	0
BAGL	RIPR	N2U_006	79				RIML	0	0			RIML	0	0	0	0
RMED	RIPL	N2U_006	74				RIMR	0	0			RIMR	0	0	0	0
RMED	RIPL	N2U_006	72				RIPL	0	0			RIPL	0	0	0	0
IL2DR	URADR	N2U_006	62				RIPR	0	0			RIPR	0	0	0	0
RMED	RIPR	N2U_006	57				RIR	0	0			RIR	0	0	0	0
IL2DR	URXR	N2U_006	51				RIS	0	0			RIS	0	0	0	0
RMED	RIPL	N2U_006	51				RIVL	0	0			RIVL	0	0	0	0
URBR	OLLR	N2U_006	28				RIVR	0	0			RIVR	0	0	0	0
URXL	URADL	N2U_006	23				RMDDL	0	0			RMDDL	0	0	0	0
IL1R	OLLR	N2U_006	15				RMDDR	0	0			RMDDR	0	0	0	0
RIPL	RIH	N2U_007	542				RMDL	0	0			RMDL	0	0	0	0
RIPL	RIPR	N2U_007	511				RMDR	0	0			RMDR	0	0	0	0
URXR	RIH	N2U_007	498				RMDVL	0	0			RMDVL	0	0	0	0
RIPL	RIPR	N2U_007	421				RMDVR	0	0			RMDVR	0	0	0	0
CEPDR	RIH	N2U_007	368				RMED	0	0			RMED	0	0	0	0
RMED	RIH	N2U_007	301				RMEL	0	0			RMEL	0	0	0	0
IL2DR	RIH	N2U_007	292				RMER	0	0			RMER	0	0	0	0
URBR	IL1R	N2U_007	260				RMEV	0	0			RMEV	0	0	0	0
CEPDL	URXL	N2U_007	259				RMFL	0	0			RMFL	0	0	0	0
IL2DL	CEPDL	N2U_007	221				RMFR	0	0			RMFR	0	0	0	0
CEPDR	URXR	N2U_007	203				RMGL	0	0			RMGL	0	0	0	0
IL2DL	IL1DL	N2U_007	194				RMGR	0	0			RMGR	0	0	0	0
URADL	IL1DL	N2U_007	181				RMHL	0	0			RMHL	0	0	0	0
CEPDL	RIPR	N2U_007	180				RMHR	0	0			RMHR	0	0	0	0
IL2DL	URXL	N2U_007	169				SAADL	0	0			SAADL	0	0	0	0
IL1DR	URADR	N2U_007	162				SAADR	0	0			SAADR	0	0	0	0
RMED	RIPR	N2U_007	150				SAAVL	0	0			SAAVL	0	0	0	0
CEPDR	URADR	N2U_007	142				SAAVR	0	0			SAAVR	0	0	0	0
IL1DR	URYDR	N2U_007	140				SDQL	0	0			SDQL	0	0	0	0
IL2DL	URADL	N2U_007	135				SDQR	0	0			SDQR	0	0	0	0
CEPDL	IL1DL	N2U_007	102				SIADL	0	0			SIADL	0	0	0	0
BAGL	RIPR	N2U_007	94				SIADR	0	0			SIADR	0	0	0	0
IL1R	OLLR	N2U_007	92				SIAVL	0	0			SIAVL	0	0	0	0
IL2DR	URADR	N2U_007	90				SIAVR	0	0			SIAVR	0	0	0	0
RMED	RIPL	N2U_007	73				SIBDL	0	0			SIBDL	0	0	0	0
URYDR	URADR	N2U_007	69				SIBDR	0	0			SIBDR	0	0	0	0
URXL	URADL	N2U_007	65				SIBVL	0	0			SIBVL	0	0	0	0
IL2DR	CEPDR	N2U_007	55				SIBVR	0	0			SIBVR	0	0	0	0
RIPL	RIH	N2U_007	51				SMBDL	0	0			SMBDL	0	0	0	0
IL2DR	IL1DR	N2U_007	45				SMBDR	0	0			SMBDR	0	0	0	0
URAVR	IL2VR	N2U_007	39				SMBVL	0	0			SMBVL	0	0	0	0
URBR	OLLR	N2U_007	37				SMBVR	0	0			SMBVR	0	0	0	0
IL2DR	RIH	N2U_008	589				SMDDL	0	0			SMDDL	0	0	0	0
CEPDR	RIH	N2U_008	442				SMDDR	0	0			SMDDR	0	0	0	0
RMED	RIH	N2U_008	433				SMDVL	0	0			SMDVL	0	0	0	0
URXR	RIH	N2U_008	360				SMDVR	0	0			SMDVR	0	0	0	0
IL2DL	URXL	N2U_008	266				URADL	0	0			URADL	0	0	0	0
CEPDL	URXL	N2U_008	265				URADR	0	0			URADR	0	0	0	0
IL2DL	CEPDL	N2U_008	253				URAVL	0	0			URAVL	0	0	0	0
RIPL	RIPR	N2U_008	243				URAVR	0	0			URAVR	0	0	0	0
URBR	IL1R	N2U_008	218				URBL	0	0			URBL	0	0	0	0
URADL	IL1DL	N2U_008	194				URBR	0	0			URBR	0	0	0	0
IL2DL	IL1DL	N2U_008	185				URXL	0	0			URXL	0	0	0	0
CEPDR	URXR	N2U_008	182				URXR	0	0			URXR	0	0	0	0
RIPL	RIH	N2U_008	181				URYDL	0	0			URYDL	0	0	0	0
IL2DR	URADR	N2U_008	179				URYDR	0	0			URYDR	0	0	0	0
RMED	RIH	N2U_008	162				URYVL	0	0			URYVL	0	0	0	0
IL2DR	RIPL	N2U_008	149				URYVR	0	0			URYVR	0	0	0	0
URXL	RIPR	N2U_008	145				VB01	0	0			VB01	0	0	0	0
IL2DR	IL1DR	N2U_008	144
IL1DR	URADR	N2U_008	138
IL1DR	URYDR	N2U_008	124
BAGL	RIPR	N2U_008	116
RIPL	RIH	N2U_008	111
CEPDR	URADR	N2U_008	108
CEPDL	RIPR	N2U_008	104
CEPDL	IL1DL	N2U_008	92
URXL	URADL	N2U_008	90
IL1R	OLLR	N2U_008	80
IL2DR	CEPDR	N2U_008	78
URAVR	IL2VR	N2U_008	68
URYDR	URADR	N2U_008	51
IL2DL	URADL	N2U_008	40
URBR	OLLR	N2U_008	35
RMED	RIH	N2U_009	1195
RMED	RIPL	N2U_009	925
RMER	RMED	N2U_009	473
CEPDR	RIH	N2U_009	339
CEPDL	URXL	N2U_009	318
RIPL	RIPR	N2U_009	282
RIPL	RIH	N2U_009	268
URXR	RIH	N2U_009	255
URBR	IL1R	N2U_009	233
IL1DR	URADR	N2U_009	188
CEPDR	URXR	N2U_009	177
RMED	RIH	N2U_009	164
IL2DL	CEPDL	N2U_009	162
URADL	IL1DL	N2U_009	159
IL2DL	IL1DL	N2U_009	135
IL2DL	URADL	N2U_009	134
IL2DL	URXL	N2U_009	126
IL2DR	IL1DR	N2U_009	121
IL1DR	URYDR	N2U_009	112
IL2DR	URADR	N2U_009	109
IL2DR	CEPDR	N2U_009	107
CEPDR	URADR	N2U_009	97
BAGL	RIPR	N2U_009	88
URXL	URADL	N2U_009	60
IL1R	OLLR	N2U_009	56
URYDR	URADR	N2U_009	37
IL2DR	RIPL	N2U_009	28
URBR	OLLR	N2U_009	8
RMED	RIH	N2U_010	1792
RMER	RMED	N2U_010	1272
IL2DR	RIH	N2U_010	994
RMED	RMEL	N2U_010	490
CEPDR	RIH	N2U_010	446
IL2DL	CEPDL	N2U_010	250
URBR	IL1R	N2U_010	249
IL1L	BAGL	N2U_010	241
CEPDL	URXL	N2U_010	232
CEPDR	URXR	N2U_010	204
RMED	RIH	N2U_010	203
IL2DR	RIPL	N2U_010	199
URXR	RIH	N2U_010	191
IL2DL	IL1DL	N2U_010	173
IL1DR	URYDR	N2U_010	151
IL1DR	URADR	N2U_010	151
URADL	IL1DL	N2U_010	148
IL2DR	URADR	N2U_010	132
IL2DR	IL1DR	N2U_010	131
IL2DR	CEPDR	N2U_010	112
CEPDR	URADR	N2U_010	111
IL2DL	URXL	N2U_010	109
IL2DL	URADL	N2U_010	108
BAGL	RIPR	N2U_010	80
OLLR	IL1R	N2U_010	75
URXL	URADL	N2U_010	48
IL2DR	RIH	N2U_010	43
URBR	OLLR	N2U_010	41
URYDR	URADR	N2U_010	17
RMER	RMED	N2U_011	1410
IL2DR	RMED	N2U_011	1145
RMED	RIH	N2U_011	885
RMER	RMEL	N2U_011	547
RMEV	RMEL	N2U_011	508
RMED	RIH	N2U_011	485
CEPDR	RIH	N2U_011	439
URXR	RIH	N2U_011	402
OLQDR	RIH	N2U_011	396
CEPDL	URXL	N2U_011	259
CEPDL	RIH	N2U_011	252
IL2DL	CEPDL	N2U_011	233
RMED	RMEL	N2U_011	204
URBR	IL1R	N2U_011	198
IL1L	BAGL	N2U_011	177
IL2DR	IL1DR	N2U_011	152
IL2DL	URXL	N2U_011	151
IL1DR	URADR	N2U_011	149
CEPDR	URADR	N2U_011	140
URADL	IL1DL	N2U_011	136
RMED	RMEV	N2U_011	128
OLLR	IL1R	N2U_011	124
IL2DL	IL1DL	N2U_011	111
IL2DR	URADR	N2U_011	110
IL2DR	CEPDR	N2U_011	105
CEPDR	URXR	N2U_011	93
IL1DR	URYDR	N2U_011	88
IL2DR	RIH	N2U_011	83
URXL	URADL	N2U_011	81
IL2DL	URADL	N2U_011	79
URYDR	URADR	N2U_011	56
URBR	OLLR	N2U_011	51
BAGL	RIPR	N2U_011	49
RMER	RMEV	N2U_011	2
IL2DR	RMED	N2U_012	952
RMED	RIH	N2U_012	949
OLQDR	RIH	N2U_012	809
RMER	RMED	N2U_012	713
RMED	RMEV	N2U_012	688
RMED	RIH	N2U_012	649
RMER	RMEL	N2U_012	586
RMEV	RMEL	N2U_012	512
IL2DR	RMER	N2U_012	451
IL2DR	RMEV	N2U_012	404
CEPDL	RIH	N2U_012	383
RMER	RMEL	N2U_012	362
CEPDR	RIH	N2U_012	338
URXR	RIH	N2U_012	299
RMER	RMEV	N2U_012	291
CEPDL	URXL	N2U_012	288
RMED	RMEL	N2U_012	282
URBR	IL1R	N2U_012	264
RMER	RMED	N2U_012	252
RMED	RMEV	N2U_012	242
IL2DL	CEPDL	N2U_012	183
CEPDR	URXR	N2U_012	157
IL1R	OLLR	N2U_012	148
URXL	URADL	N2U_012	146
IL2DL	IL1DL	N2U_012	145
URADL	IL1DL	N2U_012	144
IL2DL	URXL	N2U_012	139
IL2DR	IL1DR	N2U_012	138
IL1DR	URADR	N2U_012	138
IL2DR	CEPDR	N2U_012	131
URYDL	IL1DL	N2U_012	130
RMER	RMEV	N2U_012	120
IL1DR	URYDR	N2U_012	112
CEPDR	URADR	N2U_012	108
IL2DL	URADL	N2U_012	101
IL2DR	URADR	N2U_012	74
RMED	RMEV	N2U_012	74
IL2DR	RIH	N2U_012	60
URYDL	URADL	N2U_012	56
IL1L	BAGL	N2U_012	55
URYDR	URADR	N2U_012	39
URBR	OLLR	N2U_012	38
RMED	RMEL	N2U_012	31
BAGL	RIPR	N2U_012	26
IL2DR	RMER	N2U_013	995
IL2DR	RIPR	N2U_013	878
RMED	RIH	N2U_013	855
RMER	RMEL	N2U_013	824
RMEV	RMEL	N2U_013	707
RMER	RMED	N2U_013	626
RMED	RMEV	N2U_013	508
RMER	IL1DR	N2U_013	393
CEPDL	RIH	N2U_013	377
OLQDR	RIH	N2U_013	319
IL1L	BAGL	N2U_013	288
RMEV	RMEL	N2U_013	255
IL2DR	RIH	N2U_013	235
RMER	RMEV	N2U_013	229
IL2DR	RMED	N2U_013	228
RMER	RMEV	N2U_013	228
RMER	RMEL	N2U_013	224
URBR	IL1R	N2U_013	197
CEPDL	URXL	N2U_013	187
IL2DR	IL1DR	N2U_013	153
RMER	RMED	N2U_013	151
RMED	IL1DR	N2U_013	145
IL2DL	URXL	N2U_013	143
URXL	URADL	N2U_013	142
IL1R	OLLR	N2U_013	140
IL2DR	CEPDR	N2U_013	135
IL2DL	CEPDL	N2U_013	134
IL1DR	URYDR	N2U_013	128
URADL	IL1DL	N2U_013	121
IL1DR	URADR	N2U_013	113
URYDL	IL1DL	N2U_013	112
URBR	OLLR	N2U_013	110
IL2DR	URADR	N2U_013	109
IL2DL	URADL	N2U_013	108
IL2DL	IL1DL	N2U_013	92
URYDR	URADR	N2U_013	91
CEPDR	URXR	N2U_013	83
RMEV	RMEL	N2U_013	77
CEPDR	URADR	N2U_013	53
URYDL	URADL	N2U_013	17
IL2DR	RMER	N2U_014	1158
RMEV	RMEL	N2U_014	762
RMER	RMED	N2U_014	642
RMED	RMEV	N2U_014	517
IL2DR	RMER	N2U_014	516
RMER	RMEV	N2U_014	458
IL2DR	OLQDR	N2U_014	438
CEPDL	RIH	N2U_014	434
RMDVR	IL1DR	N2U_014	421
RMEV	RMEL	N2U_014	418
RMED	IL1DR	N2U_014	404
IL2DR	RMED	N2U_014	403
RMER	RMEL	N2U_014	379
RMEV	RMEL	N2U_014	366
RMED	RIH	N2U_014	355
IL1DR	OLQDR	N2U_014	334
RMER	IL1DR	N2U_014	331
OLQDR	RIH	N2U_014	262
CEPDL	URXL	N2U_014	242
IL2DR	RIH	N2U_014	237
URBR	IL1R	N2U_014	215
RMER	RMED	N2U_014	212
IL1L	BAGL	N2U_014	172
IL1R	OLLR	N2U_014	166
IL2DR	IL1DR	N2U_014	162
RMER	RMEL	N2U_014	131
IL2DR	CEPDR	N2U_014	126
IL2DL	IL1DL	N2U_014	125
URADL	IL1DL	N2U_014	124
CEPDR	URADR	N2U_014	123
IL2DL	URXL	N2U_014	121
IL2DL	CEPDL	N2U_014	118
IL2DR	IL1DR	N2U_014	118
IL2DR	URADR	N2U_014	115
IL1DR	URYDR	N2U_014	113
IL1DR	RIH	N2U_014	112
URBR	OLLR	N2U_014	108
IL2DR	IL1DR	N2U_014	101
URYDL	IL1DL	N2U_014	100
IL1DR	URADR	N2U_014	96
URXL	URADL	N2U_014	89
IL2DL	URADL	N2U_014	83
CEPDR	URXR	N2U_014	82
IL2DR	RMED	N2U_014	61
URYDL	URADL	N2U_014	60
URYDR	URADR	N2U_014	44
IL2DR	RMDVR	N2U_014	27
RMDVR	IL1DR	N2U_015	943
RMEV	RMEL	N2U_015	847
RMER	IL1DR	N2U_015	625
URYDR	RMDDL	N2U_015	594
RMDVR	URYDR	N2U_015	542
IL1DR	OLQDR	N2U_015	506
RMED	RMEV	N2U_015	490
RMEV	RMEL	N2U_015	460
CEPDL	RIH	N2U_015	424
IL2DR	OLQDR	N2U_015	391
RMER	RMEV	N2U_015	357
RMDVR	OLQDR	N2U_015	336
URYDR	OLQDR	N2U_015	326
RIBR	RMDVR	N2U_015	317
RMDVR	IL1DR	N2U_015	305
IL2DR	RIH	N2U_015	282
IL2DR	RIPR	N2U_015	270
RMER	RMED	N2U_015	268
RMER	RIPR	N2U_015	262
CEPDL	URXL	N2U_015	261
RMER	RMEL	N2U_015	241
RMDVR	URYDR	N2U_015	233
RMDVR	URYDR	N2U_015	219
OLQDR	RIH	N2U_015	218
RMED	RIH	N2U_015	217
URBR	IL1R	N2U_015	211
RMDVR	OLQDR	N2U_015	181
IL2DL	CEPDL	N2U_015	178
IL2DR	IL1DR	N2U_015	168
RMEV	RMEL	N2U_015	164
IL2DR	CEPDR	N2U_015	158
RMDDL	RMEV	N2U_015	153
IL1DR	URADR	N2U_015	150
IL2DL	RIH	N2U_015	147
IL2DR	RMER	N2U_015	147
URADL	IL1DL	N2U_015	143
IL2DR	IL1DR	N2U_015	137
CEPDR	URXR	N2U_015	133
IL1R	OLLR	N2U_015	130
IL1DR	URYDR	N2U_015	127
RMDVR	OLQDR	N2U_015	123
IL1DR	URYDR	N2U_015	122
IL2DL	URXL	N2U_015	122
URXL	URADL	N2U_015	121
IL2DR	IL1DR	N2U_015	119
RMED	OLQDR	N2U_015	111
CEPDR	URADR	N2U_015	110
URYDL	IL1DL	N2U_015	101
IL2DL	URADL	N2U_015	85
IL2DL	IL1DL	N2U_015	83
IL1DR	OLQDR	N2U_015	70
IL2DR	URADR	N2U_015	68
RMER	OLQDR	N2U_015	64
URBR	OLLR	N2U_015	64
IL1DR	OLQDR	N2U_015	62
URYDR	URADR	N2U_015	58
RMED	RIPR	N2U_015	57
RMED	RMEV	N2U_015	56
IL2DR	RMER	N2U_015	45
URYDL	URADL	N2U_015	44
RMDVR	IL1DR	N2U_016	2315
RMDVR	URYDR	N2U_016	2177
IL2DR	RIPR	N2U_016	966
URYDR	RMDDL	N2U_016	784
RMER	IL1DR	N2U_016	676
OLQDR	RIH	N2U_016	659
RMDVR	URYDR	N2U_016	627
IL2DR	IL1DR	N2U_016	622
RIBR	URYDR	N2U_016	595
RMDVR	IL1DR	N2U_016	594
IL1DR	URYDR	N2U_016	498
RMDDL	RMEV	N2U_016	465
RMEV	RMEL	N2U_016	446
RMEV	RMEL	N2U_016	435
CEPDL	RIH	N2U_016	387
IL2DR	OLQDR	N2U_016	353
SMDVL	RMEV	N2U_016	340
IL2DR	RMEL	N2U_016	329
IL2DR	RMEV	N2U_016	324
IL1DR	URYDR	N2U_016	314
RMER	RMEL	N2U_016	303
RMEV	RMEL	N2U_016	296
CEPDL	URXL	N2U_016	295
RIBR	RMDVR	N2U_016	271
IL1DR	URYDR	N2U_016	237
RMED	RMEV	N2U_016	226
IL1DR	OLQDR	N2U_016	221
RMER	RMED	N2U_016	221
IL2DR	URYDR	N2U_016	219
RMER	RIPR	N2U_016	218
IL2DR	RIH	N2U_016	195
IL1DR	URADR	N2U_016	191
IL2DR	CEPDR	N2U_016	169
IL2DL	CEPDL	N2U_016	166
RMED	OLQDR	N2U_016	165
URBR	IL1R	N2U_016	165
IL1R	OLLR	N2U_016	150
IL2DR	RMEL	N2U_016	149
URYDR	RMEV	N2U_016	149
IL2DL	RIH	N2U_016	149
IL2DR	IL1DR	N2U_016	129
URADL	IL1DL	N2U_016	123
URXL	URADL	N2U_016	108
CEPDR	URXR	N2U_016	102
IL1DR	URYDR	N2U_016	101
RMEV	RIPR	N2U_016	97
RMER	RMEV	N2U_016	94
CEPDR	URADR	N2U_016	93
URYDL	IL1DL	N2U_016	79
IL2DL	URADL	N2U_016	73
IL2DR	URADR	N2U_016	69
URYDL	URADL	N2U_016	66
RMER	RMDVR	N2U_016	66
RMED	RIH	N2U_016	65
IL2DL	IL1DL	N2U_016	56
URBR	OLLR	N2U_016	55
IL2DR	RMER	N2U_016	52
IL2DL	URXL	N2U_016	44
URYDR	URADR	N2U_016	22
SMBDL	SMBVL	N2U_0164	1295
SMBDR	SMBVR	N2U_0164	1070
SDQL	SDQR	N2U_0164	756
AWAR	ADFR	N2U_0164	632
ALML	PVCL	N2U_0164	595
AVBR	SDQR	N2U_0164	594
ALMR	BDUR	N2U_0164	593
ADFL	SMBVL	N2U_0164	583
SMBVR	ADFR	N2U_0164	559
PLNR	SMBVL	N2U_0164	543
RIAR	ADFR	N2U_0164	538
AWAR	AFDR	N2U_0164	533
ADFL	RIAL	N2U_0164	490
ASEL	AWCR	N2U_0164	462
SAADR	SMBVR	N2U_0164	456
RICR	RIML	N2U_0164	451
SMBDR	SIAVR	N2U_0164	438
RMHL	SDQR	N2U_0164	410
AIYR	AFDR	N2U_0164	401
AWCL	ASEL	N2U_0164	395
ASEL	AIYL	N2U_0164	394
AVBL	PVCL	N2U_0164	393
AVAL	SAAVL	N2U_0164	392
SMBVL	AIZL	N2U_0164	390
RICR	SMDDL	N2U_0164	386
RIH	RIAR	N2U_0164	382
RMDVL	PLNL	N2U_0164	378
SMBVR	AVHL	N2U_0164	375
SMBVL	SAADL	N2U_0164	365
AVFR	RIFR	N2U_0164	365
ASIL	AWCL	N2U_0164	360
ASER	AIBR	N2U_0164	355
RIR	RIH	N2U_0164	354
RIFL	PVPL	N2U_0164	352
ALMR	PVCR	N2U_0164	352
AFDL	AWAL	N2U_0164	351
AIBR	AWCR	N2U_0164	350
AVBR	HSNL	N2U_0164	349
AIBR	PVT	N2U_0164	348
AIMR	CEPVR	N2U_0164	344
ALMR	AVDL	N2U_0164	342
ASJR	PVQR	N2U_0164	341
AIBL	SMDDR	N2U_0164	341
ASER	AIYL	N2U_0164	337
DVA	AQR	N2U_0164	336
ASEL	AWAL	N2U_0164	334
ADFL	AWAL	N2U_0164	334
PLNR	RMDVR	N2U_0164	328
DVA	SIBVL	N2U_0164	322
RIR	RIVL	N2U_0164	315
HSNL	PVQR	N2U_0164	315
PLNL	SMBVR	N2U_0164	314
RMFR	SAAVL	N2U_0164	308
AIYL	AWCR	N2U_0164	307
AVER	AIZL	N2U_0164	306
RIML	SAADL	N2U_0164	306
AIZR	RIH	N2U_0164	305
DVA	AQR	N2U_0164	304
AVHL	PVPR	N2U_0164	301
ASJR	AIMR	N2U_0164	299
SMBDL	AIZL	N2U_0164	299
RMDDR	RIVL	N2U_0164	298
AVKR	SMBDL	N2U_0164	295
AVBL	AVDL	N2U_0164	288
ASHR	AIAR	N2U_0164	283
SDQL	RIS	N2U_0164	281
RICR	AIBR	N2U_0164	280
ADLR	PVPR	N2U_0164	279
AVKR	SMBVR	N2U_0164	278
ALMR	PVR	N2U_0164	278
AIBL	AIBR	N2U_0164	277
RIH	AIZL	N2U_0164	275
AIAR	ASGR	N2U_0164	273
ALMR	SIBVL	N2U_0164	272
ASIR	AWCR	N2U_0164	272
AVL	RMDDL	N2U_0164	271
RICR	AVAR	N2U_0164	271
AVBR	PVPR	N2U_0164	270
DVA	SIBVR	N2U_0164	264
AIBL	AIAL	N2U_0164	264
SIBVR	RICL	N2U_0164	262
AVBR	PVCR	N2U_0164	261
AIAL	ASGL	N2U_0164	260
RIGL	PVT	N2U_0164	259
AIZL	RIAL	N2U_0164	257
SDQL	SDQR	N2U_0164	257
ALML	BDUL	N2U_0164	257
RICR	AVBL	N2U_0164	256
AVBL	AVJR	N2U_0164	255
RIR	AVL	N2U_0164	255
RIMR	ADAR	N2U_0164	254
ASHR	RIFR	N2U_0164	253
ADLR	AWBR	N2U_0164	249
ASEL	AIYR	N2U_0164	248
AVKR	RIGR	N2U_0164	248
RMDVL	SDQR	N2U_0164	247
RMFR	RICL	N2U_0164	246
ADLR	ASHR	N2U_0164	246
AFDL	AIYL	N2U_0164	246
SIAVL	RMDVR	N2U_0164	246
AQR	PVPR	N2U_0164	245
AVBR	PVCL	N2U_0164	244
SMBDL	DVA	N2U_0164	241
RIR	RIH	N2U_0164	241
VB01	SDQR	N2U_0164	238
AIZR	RIAR	N2U_0164	237
RIML	AIZL	N2U_0164	235
AIBL	AVL	N2U_0164	234
RIGL	SMBDL	N2U_0164	232
RIGR	RIGL	N2U_0164	232
ASJL	AIAL	N2U_0164	231
AIBL	ASHL	N2U_0164	230
ADLL	AWBL	N2U_0164	229
ASKL	AIAL	N2U_0164	226
SMDDL	RMDDL	N2U_0164	225
RICR	SAAVR	N2U_0164	225
SMBDR	SIADR	N2U_0164	224
HSNR	AIAL	N2U_0164	223
ADLR	ASER	N2U_0164	219
RIBL	RIH	N2U_0164	217
SMBVR	AWBR	N2U_0164	216
AVKL	AVEL	N2U_0164	214
HSNR	PVNR	N2U_0164	214
RIFL	ASHL	N2U_0164	214
SDQR	RICL	N2U_0164	213
DVA	SDQR	N2U_0164	213
AWAR	AUAR	N2U_0164	212
RIGL	PVT	N2U_0164	211
AIBL	ASGL	N2U_0164	209
SMDDR	ALNL	N2U_0164	208
AVFL	AVBL	N2U_0164	206
RIFR	PVPR	N2U_0164	206
AVFR	AVFL	N2U_0164	206
AINL	AFDR	N2U_0164	204
AVBL	SIBVL	N2U_0164	204
HSNL	RMGL	N2U_0164	202
SMDVL	RIAR	N2U_0164	201
SIADR	SIAVR	N2U_0164	200
ADLR	AIBR	N2U_0164	200
RIMR	RICL	N2U_0164	199
AUAL	ADFL	N2U_0164	198
RICR	SDQL	N2U_0164	198
HSNR	ASHL	N2U_0164	198
AWCL	ASGL	N2U_0164	197
ASJL	PVQL	N2U_0164	197
PVNL	PVNR	N2U_0164	196
ASER	AFDL	N2U_0164	196
RMGR	RIFR	N2U_0164	195
AVEL	AIZR	N2U_0164	194
RMHL	RID	N2U_0164	193
PVNL	ALMR	N2U_0164	192
AVHR	DVA	N2U_0164	192
DVC	PVT	N2U_0164	192
AIBR	AIAR	N2U_0164	190
PVPL	AQR	N2U_0164	190
SMBDR	SAAVL	N2U_0164	190
ASKR	ASHR	N2U_0164	189
DVA	SMBVR	N2U_0164	189
AVJR	PVCL	N2U_0164	188
PVCR	AVJL	N2U_0164	188
CEPVL	RICL	N2U_0164	187
AVAL	RIMR	N2U_0164	187
AVM	ALML	N2U_0164	187
RMDDR	SMDDR	N2U_0164	186
ASKR	PVQR	N2U_0164	186
PVNL	BDUR	N2U_0164	185
AVAL	SMDDR	N2U_0164	184
VB01	ADAL	N2U_0164	184
ADAL	SAADL	N2U_0164	184
SMBDR	ALML	N2U_0164	184
RIR	SDQR	N2U_0164	183
ASER	AIYR	N2U_0164	182
ADLL	AWAL	N2U_0164	182
AUAR	RIBR	N2U_0164	182
SDQL	DVA	N2U_0164	181
ADLL	AVHR	N2U_0164	180
SMDVL	RMDDR	N2U_0164	180
AIBR	RIS	N2U_0164	179
SIAVL	DVA	N2U_0164	179
ADLR	AVHL	N2U_0164	178
SAADR	RIS	N2U_0164	177
AIMR	ASGR	N2U_0164	176
AWBL	SMBVL	N2U_0164	175
AINL	ADEL	N2U_0164	174
AIZR	SMBVR	N2U_0164	174
PVPL	AVHR	N2U_0164	173
RMHL	SIBVR	N2U_0164	173
AWCL	AIYL	N2U_0164	173
AIBL	RIMR	N2U_0164	172
SDQL	AVL	N2U_0164	172
RICR	RIVR	N2U_0164	171
AIML	ASGL	N2U_0164	171
AVFL	HSNL	N2U_0164	170
AVBL	SDQL	N2U_0164	170
SDQL	RIS	N2U_0164	170
RICL	ADAR	N2U_0164	170
ASIL	AWCR	N2U_0164	169
AVFR	AVFL	N2U_0164	169
DVA	ADAL	N2U_0164	169
RIMR	SMDDR	N2U_0164	168
AVDR	SIBVR	N2U_0164	167
AVKL	AIBR	N2U_0164	167
SMDDL	SAAVR	N2U_0164	167
RIVR	RMDDL	N2U_0164	166
SMDVL	RIS	N2U_0164	166
AVFL	AVJL	N2U_0164	165
PVQL	RMGL	N2U_0164	165
PVQR	RIFR	N2U_0164	164
AVFR	RMGL	N2U_0164	162
RIVR	RIR	N2U_0164	162
RIBL	AUAL	N2U_0164	162
CEPVR	AIAR	N2U_0164	162
RIH	RIBR	N2U_0164	162
RIR	RIS	N2U_0164	161
AVBR	AVJL	N2U_0164	160
RIFL	AVBL	N2U_0164	160
VB01	SAADL	N2U_0164	160
RIMR	AIZR	N2U_0164	159
SAADR	SMDVL	N2U_0164	159
RIS	RIVL	N2U_0164	158
AQR	PVCR	N2U_0164	158
RIR	RIGL	N2U_0164	158
RMDVL	SIAVR	N2U_0164	158
ALML	AVDR	N2U_0164	158
DVA	RICL	N2U_0164	158
AIAL	ASHL	N2U_0164	157
AVL	RIS	N2U_0164	157
AVKL	SMBDR	N2U_0164	156
AVBR	DVA	N2U_0164	155
ADLL	ASHL	N2U_0164	155
PLNR	SAADL	N2U_0164	155
RIGL	AIZL	N2U_0164	155
SMDVR	SAADL	N2U_0164	154
RMFR	SDQR	N2U_0164	153
ADLL	ASEL	N2U_0164	153
AVER	AVKR	N2U_0164	153
SIBDR	SIAVR	N2U_0164	151
ASJL	AIML	N2U_0164	151
PVNL	BDUL	N2U_0164	151
SAAVR	RMFL	N2U_0164	151
SIBDL	SIADL	N2U_0164	150
ASER	AWCR	N2U_0164	149
AVBR	PVCR	N2U_0164	148
AVKL	AVKR	N2U_0164	147
ASJR	CEPVR	N2U_0164	147
SAAVR	SMBDL	N2U_0164	146
AVFL	HSNR	N2U_0164	146
AVFR	AVJR	N2U_0164	146
AVDR	RID	N2U_0164	146
RIVR	SAADL	N2U_0164	145
RIH	RIAL	N2U_0164	144
RIML	SIADL	N2U_0164	144
AWBL	AWAL	N2U_0164	144
SMDDL	AVAR	N2U_0164	143
SAADR	PLNL	N2U_0164	142
RMFR	PVT	N2U_0164	142
RIFL	ADLL	N2U_0164	142
AIBL	ADLL	N2U_0164	142
RIFL	HSNR	N2U_0164	141
AFDL	AUAL	N2U_0164	141
SAADR	RIAR	N2U_0164	141
AIBL	SDQR	N2U_0164	140
AFDL	ADFL	N2U_0164	140
AVDL	DVA	N2U_0164	140
DVC	SMBDL	N2U_0164	139
RIVR	SMDVR	N2U_0164	137
ASKL	RMGL	N2U_0164	137
SMBDR	DVA	N2U_0164	137
AVHL	AVJL	N2U_0164	137
RIFL	AVHR	N2U_0164	137
SMDDL	SIADL	N2U_0164	136
HSNL	AVJL	N2U_0164	134
SIBDR	RICL	N2U_0164	132
SMBDR	SIADR	N2U_0164	132
AIML	AIAL	N2U_0164	132
RIR	AIZL	N2U_0164	131
ASKL	PVQL	N2U_0164	131
AVEL	SMBDR	N2U_0164	131
ASIL	ASGL	N2U_0164	131
BDUR	HSNR	N2U_0164	130
RIGR	SMBVR	N2U_0164	129
AVM	PVR	N2U_0164	129
ASKL	HSNL	N2U_0164	129
SIAVL	SIBDL	N2U_0164	128
ALML	PVCR	N2U_0164	127
RIVR	RIS	N2U_0164	127
AIYL	AWAL	N2U_0164	126
AVFL	AIAL	N2U_0164	126
AIYR	AWCR	N2U_0164	125
AIAR	ASGR	N2U_0164	124
SIBVR	RID	N2U_0164	123
AVM	AVBL	N2U_0164	123
SMBDR	ALNL	N2U_0164	123
AVM	SIBVL	N2U_0164	123
ASKR	HSNL	N2U_0164	123
AVDL	PVCR	N2U_0164	123
RIVR	SIAVL	N2U_0164	122
AVKL	AVKR	N2U_0164	122
PVPL	AVBL	N2U_0164	122
SIAVL	SMBDL	N2U_0164	121
RIBL	RIAL	N2U_0164	120
AVKL	DVC	N2U_0164	120
SDQL	RMFL	N2U_0164	120
SIBVL	ADAL	N2U_0164	119
AUAL	RIAL	N2U_0164	119
SIBDR	ADAR	N2U_0164	117
ASIR	ASGR	N2U_0164	117
RMDVL	SAAVL	N2U_0164	117
AVAL	RIAR	N2U_0164	116
AVAR	RIAL	N2U_0164	116
AINR	RIBL	N2U_0164	116
HSNL	RIFR	N2U_0164	116
AVFR	PVNR	N2U_0164	116
AVKR	DVC	N2U_0164	116
RICR	AVL	N2U_0164	115
SIAVL	SDQR	N2U_0164	114
AIBL	RIGR	N2U_0164	114
AVFL	HSNR	N2U_0164	113
SMBDR	SIBVR	N2U_0164	113
HSNR	RIFR	N2U_0164	113
AIYR	RIBR	N2U_0164	113
AVM	BDUL	N2U_0164	113
AIZR	ADFR	N2U_0164	113
SAADR	AVAL	N2U_0164	112
SIBDL	SIBVL	N2U_0164	112
SMBDR	SMDDR	N2U_0164	111
AVKR	AVL	N2U_0164	111
AIBR	AIZL	N2U_0164	111
RICR	RIS	N2U_0164	111
SMDVR	RIAL	N2U_0164	111
SIBDR	PLNL	N2U_0164	111
SIBVL	SAADL	N2U_0164	110
ADLR	AWAR	N2U_0164	110
RIVR	SIAVL	N2U_0164	110
SMDDL	SMBDL	N2U_0164	109
RMFR	RIMR	N2U_0164	108
SMDDL	RIAL	N2U_0164	108
AINL	RIVL	N2U_0164	106
AVDR	PVCR	N2U_0164	106
SIBDR	SIADR	N2U_0164	105
AQR	PVCL	N2U_0164	105
RMGR	PVQR	N2U_0164	105
ASGR	AWCR	N2U_0164	105
RICR	RMFL	N2U_0164	104
RICR	RMHR	N2U_0164	104
PVNL	BDUL	N2U_0164	103
RMHR	AVBL	N2U_0164	103
SIADR	SDQL	N2U_0164	102
ASHR	HSNL	N2U_0164	102
SMDDR	SIADR	N2U_0164	102
RIR	RIGL	N2U_0164	102
ASER	AINR	N2U_0164	101
RIMR	SAAVL	N2U_0164	101
RMDDL	RIAL	N2U_0164	98
SIADR	AIZR	N2U_0164	98
PVNR	BDUL	N2U_0164	98
PVNL	PVNR	N2U_0164	97
AIBL	ASEL	N2U_0164	96
VB01	SDQL	N2U_0164	96
AINR	AFDL	N2U_0164	95
AVHL	RIVL	N2U_0164	95
AIYR	AUAR	N2U_0164	95
ASJR	ASKR	N2U_0164	94
ASJR	AIAR	N2U_0164	94
RIVR	PLNR	N2U_0164	94
SIAVR	SIBVR	N2U_0164	94
AVBL	DVA	N2U_0164	92
SIBDR	SMDDR	N2U_0164	92
AVM	AVDR	N2U_0164	91
AVEL	ADLL	N2U_0164	91
PLNL	SIAVR	N2U_0164	91
SIBDR	SIBVR	N2U_0164	91
AVBR	SIBVR	N2U_0164	91
AVKL	SMBVR	N2U_0164	90
PVNL	HSNR	N2U_0164	90
AIMR	AIAR	N2U_0164	90
BDUR	AVJL	N2U_0164	90
RID	RMED	N2U_0164	89
AIBL	AVKR	N2U_0164	88
RIVR	RMDVR	N2U_0164	88
SDQR	RICL	N2U_0164	88
SMDDR	RIAR	N2U_0164	87
RIGL	DVC	N2U_0164	87
AVHR	AWBL	N2U_0164	87
ADLR	RIFR	N2U_0164	87
VB01	RMFL	N2U_0164	87
RIH	AIYR	N2U_0164	87
AVDL	AQR	N2U_0164	86
CEPVR	ASGR	N2U_0164	85
DVA	AVHL	N2U_0164	85
AVEL	SIADR	N2U_0164	84
RMFR	AVKL	N2U_0164	83
AWBR	ADFR	N2U_0164	83
BDUL	PVCL	N2U_0164	83
SIBDR	SIAVR	N2U_0164	83
SIAVL	CEPVL	N2U_0164	82
AIYR	AWAR	N2U_0164	81
RICR	SDQR	N2U_0164	81
AIMR	ASGR	N2U_0164	81
AIBR	RIML	N2U_0164	80
AVFR	HSNL	N2U_0164	79
RMFL	SAADL	N2U_0164	79
AINL	AVHL	N2U_0164	79
AIYR	RIAR	N2U_0164	79
AIBL	AWCL	N2U_0164	78
RIR	RMEV	N2U_0164	77
SIBVR	PVCR	N2U_0164	77
PVPL	DVA	N2U_0164	76
SMBDL	SIADL	N2U_0164	76
RIVR	RICL	N2U_0164	76
ASKL	ASJL	N2U_0164	76
AVBL	AQR	N2U_0164	75
DVA	PVCL	N2U_0164	75
AIBR	AIYR	N2U_0164	74
SIBDR	SIADR	N2U_0164	74
SDQL	ALML	N2U_0164	74
ASHR	AVBR	N2U_0164	74
ADFL	AIZL	N2U_0164	74
SMDDR	SDQR	N2U_0164	74
AVEL	AIBL	N2U_0164	74
SDQR	RIVL	N2U_0164	74
RIGR	AIZR	N2U_0164	73
SMBDL	SIBDL	N2U_0164	73
RIVR	AIBR	N2U_0164	73
RIVR	SDQR	N2U_0164	73
ALNL	SAAVL	N2U_0164	72
AVHR	SMBDL	N2U_0164	71
AVFL	HSNL	N2U_0164	71
AVHL	AQR	N2U_0164	71
ADLR	AIAR	N2U_0164	71
RIVR	SDQR	N2U_0164	71
AWBR	AVHL	N2U_0164	70
AINL	AUAR	N2U_0164	70
AIBL	RIVR	N2U_0164	69
ASER	AWAR	N2U_0164	68
HSNR	AVJL	N2U_0164	68
PVNL	PVNR	N2U_0164	66
SMDVL	SMDDR	N2U_0164	65
AINL	AVJL	N2U_0164	64
AIZL	SIADL	N2U_0164	64
AVBR	RIFR	N2U_0164	63
SMBDL	SIADL	N2U_0164	62
AVDL	SIBVL	N2U_0164	62
RIMR	SIADR	N2U_0164	62
PVCR	PVCL	N2U_0164	61
AIBR	RIS	N2U_0164	61
AVFR	HSNL	N2U_0164	60
SMDVR	RMDDL	N2U_0164	60
PVPR	PVCR	N2U_0164	60
AIBR	AVER	N2U_0164	60
AVHR	SMBVL	N2U_0164	60
AUAR	AFDR	N2U_0164	60
AWAR	AWBR	N2U_0164	59
HSNL	AIAL	N2U_0164	59
AVFR	HSNR	N2U_0164	58
AIBL	AIZR	N2U_0164	58
AVKL	AIBL	N2U_0164	58
SIADR	ADAR	N2U_0164	58
SMBDR	SDQL	N2U_0164	58
AINR	AUAL	N2U_0164	57
ASIL	AIYL	N2U_0164	56
AVBR	RMHL	N2U_0164	56
RIAL	SAADL	N2U_0164	56
SIAVR	SDQR	N2U_0164	55
RIVR	SDQR	N2U_0164	55
RIVR	AVL	N2U_0164	54
RICR	SDQL	N2U_0164	54
AIBL	RIGL	N2U_0164	53
SMBVR	RIS	N2U_0164	52
PVNR	PVCL	N2U_0164	51
AVFR	AVBL	N2U_0164	50
RMFR	DVC	N2U_0164	50
VB01	DVA	N2U_0164	49
RIVR	CEPVL	N2U_0164	46
SIAVL	SIBVL	N2U_0164	46
ASJR	RMGR	N2U_0164	46
AVM	ALMR	N2U_0164	46
SAAVR	SAADL	N2U_0164	45
AIBR	ASGR	N2U_0164	45
AVJR	PVNR	N2U_0164	44
AVER	SMBDL	N2U_0164	40
ALMR	AVJL	N2U_0164	40
SDQR	ADAL	N2U_0164	39
AIYR	ADFR	N2U_0164	39
ASKR	AIAR	N2U_0164	38
AVKL	AVER	N2U_0164	37
AVBL	HSNR	N2U_0164	37
AVBL	ALML	N2U_0164	36
SMBDL	AIZL	N2U_0164	35
RMFR	RMDVL	N2U_0164	35
RICR	RMDDL	N2U_0164	34
AVM	RID	N2U_0164	34
RIVR	SAADL	N2U_0164	30
RIVR	AVAR	N2U_0164	30
RMDDR	RIS	N2U_0164	29
PVNL	ALMR	N2U_0164	28
AIBR	AIAR	N2U_0164	27
RMFR	AIBR	N2U_0164	26
AUAR	ADFR	N2U_0164	26
AIAR	ASGR	N2U_0164	26
RIFL	AVFR	N2U_0164	26
RICR	SAADL	N2U_0164	23
SMDDR	RIVL	N2U_0164	23
AVAL	PLNL	N2U_0164	22
RIGR	AVL	N2U_0164	22
PVR	SIBVL	N2U_0164	22
ADFL	AWBL	N2U_0164	17
AVAL	RMDVL	N2U_0164	15
AIBR	SDQL	N2U_0164	14
RIGL	SMBVL	N2U_0164	11
AIYR	AWAR	N2U_0164	8
AVFL	AVJR	N2U_0164	7
RIVR	PLNR	N2U_0164	4
SAAVR	RIML	N2U_0164	3
SMBVL	RIAL	N2U_0164	2
SDQR	SIBVR	N2U_0164	2
RMDVR	IL1DR	N2U_017	2741
RMDVR	URYDR	N2U_017	1763
URYDR	RMDDL	N2U_017	901
RMEV	RMEL	N2U_017	826
IL2DR	RIPR	N2U_017	701
RIBR	URYDR	N2U_017	663
RMER	IL1DR	N2U_017	661
RMDDL	RMEV	N2U_017	641
OLQDR	RIH	N2U_017	613
RMDVR	IL1DR	N2U_017	603
IL2DR	IL1DR	N2U_017	575
RMDVR	URYDR	N2U_017	514
RMEV	RIPR	N2U_017	509
RMEV	RMDDR	N2U_017	471
SMDVL	RMEV	N2U_017	462
CEPDL	RIH	N2U_017	451
URYDR	OLQDR	N2U_017	437
RMEV	RMDDR	N2U_017	433
IL2DL	RMED	N2U_017	398
RMDVR	OLLR	N2U_017	394
IL2DR	RMEV	N2U_017	387
RMER	RIPR	N2U_017	383
RIBR	OLLR	N2U_017	379
RMER	RMED	N2U_017	361
IL1DR	OLLR	N2U_017	356
URYDL	RIH	N2U_017	338
IL2DR	RMEL	N2U_017	337
IL2DR	OLQDR	N2U_017	334
IL1DR	RIPR	N2U_017	332
CEPDL	URXL	N2U_017	323
RIBR	RMDVR	N2U_017	320
IL1DR	URYDR	N2U_017	294
RMER	RMED	N2U_017	284
IL1DR	OLQDR	N2U_017	237
AVEL	RMDVR	N2U_017	232
AVEL	URYDR	N2U_017	224
IL2DR	RMEV	N2U_017	223
RMEV	RMEL	N2U_017	219
RIPR	RMEL	N2U_017	209
IL2DR	CEPDR	N2U_017	193
RMER	RMEL	N2U_017	187
RMED	RIPR	N2U_017	174
IL1DR	OLLR	N2U_017	171
RMER	OLLR	N2U_017	168
IL2DL	RIH	N2U_017	162
IL1DR	URADR	N2U_017	154
RMEV	RIH	N2U_017	150
IL2DL	IL1DL	N2U_017	149
IL2DR	RIPR	N2U_017	149
IL1R	OLLR	N2U_017	148
CEPDR	URADR	N2U_017	144
RMEV	RMEL	N2U_017	144
IL2DL	CEPDL	N2U_017	144
RMED	RIH	N2U_017	143
URBR	IL1R	N2U_017	141
IL2DR	RMER	N2U_017	137
OLQDR	RMED	N2U_017	132
RMEV	RIPR	N2U_017	123
RMDVR	OLLR	N2U_017	117
IL1DR	URYDR	N2U_017	117
CEPDR	URXR	N2U_017	116
URBR	OLLR	N2U_017	116
RIBR	AVEL	N2U_017	111
IL2DR	IL1DR	N2U_017	105
URADL	IL1DL	N2U_017	93
IL2DR	URADR	N2U_017	90
URYDR	RMEV	N2U_017	90
IL2DL	URXL	N2U_017	89
RMER	OLQDR	N2U_017	79
RIH	RIPR	N2U_017	73
URYDL	IL1DL	N2U_017	71
URXL	URADL	N2U_017	63
OLQDR	OLLR	N2U_017	61
IL2DL	RMEL	N2U_017	60
URYDR	OLQDR	N2U_017	58
IL2DL	URADL	N2U_017	50
IL1DR	OLQDR	N2U_017	49
IL1DR	URYDR	N2U_017	47
URYDR	URADR	N2U_017	38
RMED	RMEL	N2U_017	37
IL2DR	URYDR	N2U_017	28
URYDL	URADL	N2U_017	22
RMER	RMEV	N2U_017	12
RMDVR	IL1DR	N2U_018	2186
RMDVR	URYDR	N2U_018	1811
RMEV	RMDDR	N2U_018	1129
URYDR	RMDDL	N2U_018	963
RMEV	RMEL	N2U_018	865
RIBR	URYDR	N2U_018	835
IL2DR	RIPR	N2U_018	754
IL2DR	IL1DR	N2U_018	745
RMDVR	IL1DR	N2U_018	694
IL1DR	RIPR	N2U_018	660
RMDDL	RMEV	N2U_018	641
IL2DR	RMEL	N2U_018	638
RMER	IL1DR	N2U_018	619
RMDDL	RMDDR	N2U_018	605
IL1DR	OLLR	N2U_018	587
RMDVR	URYDR	N2U_018	584
RMEV	RMED	N2U_018	562
SMDVL	RMEV	N2U_018	558
URYDR	OLQDR	N2U_018	482
OLQDR	RIH	N2U_018	481
RMEV	RIPR	N2U_018	453
URADR	RMEL	N2U_018	439
RMEV	RMEL	N2U_018	427
URYDL	RIH	N2U_018	417
CEPDL	RIH	N2U_018	416
OLQDR	RMED	N2U_018	396
AVEL	URYDR	N2U_018	394
RMER	RMED	N2U_018	375
IL1DR	URYDR	N2U_018	357
RIPR	RMEL	N2U_018	344
RIBR	OLLR	N2U_018	314
IL2DR	OLQDR	N2U_018	278
IL1DR	URYDR	N2U_018	275
IL1DR	OLLR	N2U_018	271
CEPDL	URXL	N2U_018	261
AVEL	RMDVR	N2U_018	254
IL1DR	OLQDR	N2U_018	253
IL2DL	RMED	N2U_018	249
RMED	RIH	N2U_018	246
IL2DL	RIPL	N2U_018	237
IL2DL	RMEL	N2U_018	236
IL2DR	RMEV	N2U_018	231
RMED	RIPR	N2U_018	229
RMED	RMEL	N2U_018	226
IL2DR	CEPDR	N2U_018	211
IL2DL	RIH	N2U_018	190
URADR	RIPR	N2U_018	189
IL2DR	RIH	N2U_018	180
IL1DR	URADR	N2U_018	179
RIH	RIPR	N2U_018	173
IL1R	OLLR	N2U_018	165
IL2DR	IL1DR	N2U_018	165
URYDL	RMEL	N2U_018	157
RMEV	RMEL	N2U_018	154
RMDVR	OLLR	N2U_018	153
OLQDR	RMEV	N2U_018	151
CEPDR	URADR	N2U_018	141
IL2DR	URYDR	N2U_018	134
URXL	URADL	N2U_018	134
RMDVR	URADR	N2U_018	129
URYDL	RMED	N2U_018	127
IL2DL	CEPDL	N2U_018	127
CEPDR	URXR	N2U_018	123
RMEV	RIH	N2U_018	120
URYDR	OLLR	N2U_018	117
URADR	RMDDL	N2U_018	116
IL2DL	URADL	N2U_018	111
URADL	IL1DL	N2U_018	108
URBR	IL1R	N2U_018	107
RMER	RIPR	N2U_018	104
URYDR	OLQDR	N2U_018	103
URYDR	URADR	N2U_018	100
RMER	RMEL	N2U_018	99
IL1DR	URYDR	N2U_018	99
IL2DR	URADR	N2U_018	95
IL1DR	OLQDR	N2U_018	93
URYDL	IL1DL	N2U_018	93
URBR	OLLR	N2U_018	90
IL2DL	RMER	N2U_018	81
URYDR	RMEV	N2U_018	78
RMER	RIPR	N2U_018	76
RMER	RMEV	N2U_018	68
IL2DL	IL1DL	N2U_018	68
IL2DL	URXL	N2U_018	56
URYDR	URADR	N2U_018	44
URYDL	URADL	N2U_018	43
RMDVR	OLLR	N2U_018	19
RMDVR	IL1DR	N2U_019	2596
RMDVR	URYDR	N2U_019	1908
RIBR	URYDR	N2U_019	1424
RMEV	RMDDR	N2U_019	1318
URYDR	RMDDL	N2U_019	1034
IL2DL	RMER	N2U_019	985
RIPR	IL1DR	N2U_019	835
RMDDL	RMDDR	N2U_019	825
RMDVR	IL1DR	N2U_019	800
OLQDR	RIH	N2U_019	795
RMDVR	URYDR	N2U_019	740
URYDR	OLQDR	N2U_019	707
RIPR	RIH	N2U_019	676
IL2DR	RMEL	N2U_019	631
IL2DR	RIPR	N2U_019	629
RMER	IL1DR	N2U_019	626
URYDL	RIH	N2U_019	605
AVEL	URYDR	N2U_019	579
IL1DR	OLLR	N2U_019	565
RMEV	RMED	N2U_019	556
SMDVL	RMEV	N2U_019	544
IL2DR	IL1DR	N2U_019	510
RMEV	RMEL	N2U_019	495
IL1DR	OLLR	N2U_019	430
RMED	IL2R	N2U_019	426
RIPR	RMEL	N2U_019	422
CEPDL	RIH	N2U_019	401
RMER	RMED	N2U_019	397
RIBR	OLLR	N2U_019	383
RIH	IL2R	N2U_019	346
IL1DR	URYDR	N2U_019	340
RIPR	RMED	N2U_019	328
OLQDR	IL2R	N2U_019	326
RIPR	URADR	N2U_019	325
RMED	RIH	N2U_019	316
AVEL	OLLR	N2U_019	307
RMER	RIH	N2U_019	294
AVEL	RMDVR	N2U_019	291
CEPDL	URXL	N2U_019	278
IL1DR	URYDR	N2U_019	277
RMDDL	RMEV	N2U_019	241
IL2DR	RIH	N2U_019	241
IL2DR	CEPDR	N2U_019	237
IL2DR	OLQDR	N2U_019	236
IL1DR	OLQDR	N2U_019	230
IL2DL	RMEL	N2U_019	222
RMDVR	OLLR	N2U_019	206
OLQDR	RMED	N2U_019	202
URYDL	RMEL	N2U_019	200
IL2DR	URYDR	N2U_019	195
RMER	RMEV	N2U_019	193
IL1DR	URADR	N2U_019	188
URYDR	OLLR	N2U_019	184
IL2DL	RMED	N2U_019	183
IL1R	OLLR	N2U_019	173
RMDVR	URADR	N2U_019	163
URYDR	URADR	N2U_019	160
RMED	RMEL	N2U_019	152
IL2DR	IL1DR	N2U_019	149
CEPDR	URXR	N2U_019	145
URADR	RMEL	N2U_019	138
URXL	URADL	N2U_019	126
RMEV	RMEL	N2U_019	125
URYDR	RMDDR	N2U_019	124
URYDR	RMEV	N2U_019	119
RMDDL	RMDDR	N2U_019	118
IL1DR	RMED	N2U_019	117
URYDL	RMED	N2U_019	115
IL2DL	CEPDL	N2U_019	113
URYDL	IL1DL	N2U_019	113
URYDR	OLQDR	N2U_019	112
URBR	OLLR	N2U_019	104
URBR	IL1R	N2U_019	103
IL2DL	URADL	N2U_019	103
CEPDR	URADR	N2U_019	102
URADR	RMDDR	N2U_019	97
URADL	IL1DL	N2U_019	95
IL2DR	URADR	N2U_019	92
RMEV	IL2R	N2U_019	88
IL1DR	URYDR	N2U_019	77
IL2DL	IL1DL	N2U_019	76
RMER	RMEL	N2U_019	74
IL2DL	RIPL	N2U_019	67
IL1DR	URADR	N2U_019	65
URYDR	URADR	N2U_019	51
RIPR	RMEV	N2U_019	49
CEPDL	URADL	N2U_019	41
IL1DR	OLQDR	N2U_019	40
SMDVL	RMDDR	N2U_019	26
RMDVR	OLLR	N2U_019	26
URYDL	URADL	N2U_019	25
RMDVR	IL1DR	N2U_020	3516
URYDR	RMDDL	N2U_020	1486
OLQDR	RIH	N2U_020	1127
RIPR	IL1DR	N2U_020	1001
RMDVR	URYDR	N2U_020	976
RMEV	RMED	N2U_020	965
RIPR	RIH	N2U_020	943
RMDDL	RMDDR	N2U_020	937
URYDL	RMDVL	N2U_020	908
IL1DR	OLLR	N2U_020	905
RMDVR	URYDR	N2U_020	891
RMER	RIH	N2U_020	744
RMEV	RMDDR	N2U_020	694
IL1DR	OLLR	N2U_020	675
URYDL	RIH	N2U_020	653
OLQDR	RMEV	N2U_020	648
IL2DL	RMER	N2U_020	622
AVEL	OLLR	N2U_020	618
IL2DR	RMEL	N2U_020	576
AVEL	RMDVR	N2U_020	567
SMDVL	RMEV	N2U_020	558
RIPR	URADR	N2U_020	558
IL2DR	RIPR	N2U_020	548
URYDR	SMDDL	N2U_020	542
IL1DR	RMEV	N2U_020	532
RMER	RMEV	N2U_020	525
RIBR	OLLR	N2U_020	524
RMDVR	OLLR	N2U_020	516
URYDL	RMDDR	N2U_020	510
IL2DR	IL1DR	N2U_020	504
RMEV	IL2R	N2U_020	470
AVEL	URYDR	N2U_020	468
URADR	RMEL	N2U_020	463
OLQDR	SMDDL	N2U_020	449
AVEL	URYDR	N2U_020	437
CEPDL	RIH	N2U_020	400
IL2DL	RMEL	N2U_020	393
RIPR	URADR	N2U_020	387
RMEV	RMDDR	N2U_020	377
RIH	IL2R	N2U_020	376
IL2DR	RIH	N2U_020	361
URYDR	OLLR	N2U_020	350
IL1DR	URYDR	N2U_020	332
RMER	RIPR	N2U_020	330
IL2DR	IL2R	N2U_020	323
IL1DR	RMED	N2U_020	318
URYDL	RMEL	N2U_020	307
AVEL	RMDVR	N2U_020	293
IL1DR	URYDR	N2U_020	292
URYDR	OLQDR	N2U_020	283
URYDL	RMEV	N2U_020	277
RMDVR	OLLR	N2U_020	277
RMED	RIH	N2U_020	272
IL1DR	RMED	N2U_020	269
CEPDL	URXL	N2U_020	251
URADR	RMEL	N2U_020	235
IL2DR	OLQDR	N2U_020	233
RMDDL	RMEV	N2U_020	222
RMDVR	IL1DR	N2U_020	218
RMEV	RMED	N2U_020	217
IL2DR	CEPDR	N2U_020	215
IL1R	OLLR	N2U_020	202
URADR	RMED	N2U_020	200
IL2DR	URYDR	N2U_020	197
IL2DL	CEPDL	N2U_020	195
IL2DL	RMED	N2U_020	192
IL1DR	OLQDR	N2U_020	183
URYDR	RMED	N2U_020	180
IL2DL	RIPL	N2U_020	172
CEPDR	URXR	N2U_020	170
OLQDR	IL2R	N2U_020	169
RIPR	RMEL	N2U_020	168
URBR	OLLR	N2U_020	164
IL2DR	IL1DR	N2U_020	158
RMED	RMEL	N2U_020	147
IL2DL	RMEV	N2U_020	139
IL1DR	URADR	N2U_020	136
CEPDR	URADR	N2U_020	131
IL2DR	URADR	N2U_020	120
IL2DL	RIH	N2U_020	114
CEPDR	URYDR	N2U_020	100
URYDR	URADR	N2U_020	96
CEPDL	URADL	N2U_020	95
URXL	URADL	N2U_020	95
IL1DR	URYDR	N2U_020	95
URADL	IL1DL	N2U_020	94
IL2DL	IL1DL	N2U_020	94
IL2DL	URADL	N2U_020	92
URYDL	RMER	N2U_020	91
RMER	RMEL	N2U_020	86
IL1DR	SMDDL	N2U_020	84
IL2R	RMEL	N2U_020	84
URYDL	RMED	N2U_020	81
RMDVR	URADR	N2U_020	80
URADR	RMDDL	N2U_020	72
RMDDL	RMEV	N2U_020	72
URYDL	IL1DL	N2U_020	71
RMDVR	RMDDL	N2U_020	69
URYDR	RMEV	N2U_020	66
URYDR	URADR	N2U_020	66
IL1DR	URADR	N2U_020	65
URBR	IL1R	N2U_020	62
URYDR	OLQDR	N2U_020	49
IL1DR	OLQDR	N2U_020	24
URYDL	URADL	N2U_020	22
URADR	RMEV	N2U_020	20
IL1DR	URADR	N2U_020	15
RMDVR	IL1DR	N2U_021	3497
RMDVR	OLLR	N2U_021	2519
AVEL	OLLR	N2U_021	2399
AVEL	URYDR	N2U_021	1410
RIPR	URADR	N2U_021	1367
RMDDL	RMDDR	N2U_021	1242
RIPR	IL1DR	N2U_021	1108
AVEL	SMDDL	N2U_021	1044
OLQDR	RIH	N2U_021	987
RIPR	RIH	N2U_021	985
URYDL	RMDVL	N2U_021	968
URYDR	RMDDL	N2U_021	954
IL1DR	OLLR	N2U_021	938
IL1DR	OLLR	N2U_021	888
IL2DL	RMER	N2U_021	825
RMER	RIH	N2U_021	811
RIBR	URYDR	N2U_021	730
URADR	RMEL	N2U_021	696
URYDL	RMDDR	N2U_021	652
RMEV	IL2R	N2U_021	651
OLQDR	RMEV	N2U_021	634
OLQDR	SMDDL	N2U_021	628
RIBR	AVEL	N2U_021	625
URADR	RMEV	N2U_021	615
RMDVR	URYDR	N2U_021	601
SMDVL	RMEV	N2U_021	575
RMEV	RMED	N2U_021	549
IL1DR	RMEV	N2U_021	518
IL2DR	RMEL	N2U_021	495
URYDL	RIH	N2U_021	493
IL1DR	RMED	N2U_021	487
IL2DR	IL1DR	N2U_021	472
IL2DR	RIPR	N2U_021	448
CEPDR	OLLR	N2U_021	440
RIBR	OLLR	N2U_021	425
RIH	IL2R	N2U_021	400
CEPDL	RIH	N2U_021	367
AVEL	CEPDR	N2U_021	363
RMED	RIH	N2U_021	348
URYDR	RMDDL	N2U_021	327
RIBR	RIS	N2U_021	305
IL1DR	URYDR	N2U_021	302
RMEV	RMDDR	N2U_021	285
RMER	IL1DR	N2U_021	278
RMDVR	URYDR	N2U_021	275
RMDVR	RMDDL	N2U_021	273
CEPDL	URXL	N2U_021	268
IL1DR	RMED	N2U_021	265
IL2DR	IL2R	N2U_021	255
IL2DL	RMED	N2U_021	245
IL2DL	RMEL	N2U_021	238
IL1DR	URADR	N2U_021	237
IL2DL	RIH	N2U_021	231
IL1DR	URADR	N2U_021	231
RMER	RMEV	N2U_021	227
RMER	URADR	N2U_021	221
IL2DR	CEPDR	N2U_021	218
RMDVR	IL1DR	N2U_021	215
IL2DL	IL1DL	N2U_021	212
URYDR	RMED	N2U_021	210
IL2DL	CEPDL	N2U_021	201
RMEV	RMDDR	N2U_021	198
IL1DL	RMEV	N2U_021	198
IL2DL	RIPL	N2U_021	193
IL1DR	OLQDR	N2U_021	192
RMDDL	RMEV	N2U_021	191
OLQDR	IL2R	N2U_021	185
IL2DR	OLQDR	N2U_021	183
RMED	RMEL	N2U_021	179
URBR	OLLR	N2U_021	178
RMER	RIPR	N2U_021	164
RMEV	RMDDR	N2U_021	158
IL2R	RMEL	N2U_021	156
RMER	URADL	N2U_021	154
CEPDR	URXR	N2U_021	152
IL1DR	SMDDL	N2U_021	151
IL1DL	OLLR	N2U_021	151
IL1R	OLLR	N2U_021	148
IL1DR	IL1DL	N2U_021	146
CEPDR	URADR	N2U_021	145
IL2DL	URADL	N2U_021	143
URYDR	SMDDL	N2U_021	135
URYDR	URADR	N2U_021	134
URYDR	OLQDR	N2U_021	123
RMEV	RMED	N2U_021	120
URADL	RMEL	N2U_021	112
IL2DR	URYDR	N2U_021	108
IL2DL	URADL	N2U_021	107
IL2DR	IL1DR	N2U_021	103
CEPDR	URYDR	N2U_021	102
IL1DR	URYDR	N2U_021	99
IL1DR	OLQDR	N2U_021	92
CEPDL	URADL	N2U_021	81
IL2DL	RMEV	N2U_021	79
AVEL	OLQDR	N2U_021	73
URYDR	URADR	N2U_021	71
IL2DR	URADR	N2U_021	70
RMER	RMED	N2U_021	64
URYDL	RMEL	N2U_021	63
RMEV	RMED	N2U_021	60
URYDL	IL1DL	N2U_021	59
URADL	IL1DL	N2U_021	58
URADR	RMED	N2U_021	57
CEPDL	IL1DL	N2U_021	56
URADR	RMDDL	N2U_021	52
RIH	RMEL	N2U_021	46
IL1DR	URYDR	N2U_021	39
URYDR	RMEV	N2U_021	35
URYDL	URADL	N2U_021	33
URXL	URADL	N2U_021	32
URYDL	RMEV	N2U_021	27
IL2DR	SMDDL	N2U_021	17
RMEV	RMDDR	N2U_021	15
SMDVL	RMEV	N2U_021	8
SMDVL	RMDDR	N2U_021	8
IL2DR	RIH	N2U_021	7
URBR	IL1R	N2U_021	4
RMDVR	IL1DR	N2U_022	3181
RMDVR	OLLR	N2U_022	2658
AVEL	OLLR	N2U_022	2101
AVEL	URYDR	N2U_022	1535
RMDDL	RMDDR	N2U_022	1298
RIPR	IL1DR	N2U_022	1108
OLQDR	RIH	N2U_022	1099
RMEV	RMED	N2U_022	1050
CEPDR	OLLR	N2U_022	1016
RMEV	IL2R	N2U_022	995
IL1DR	OLLR	N2U_022	986
AVEL	SMDDL	N2U_022	970
RIBR	URYDR	N2U_022	905
URYDL	RMDDR	N2U_022	880
URYDL	IL1DL	N2U_022	872
RIPR	URADR	N2U_022	870
URYDL	RIH	N2U_022	862
IL1DR	OLLR	N2U_022	811
CEPDR	OLLR	N2U_022	804
IL1DR	RMED	N2U_022	729
URYDL	RMDVL	N2U_022	720
RMER	RIH	N2U_022	710
OLQDR	SMDDL	N2U_022	686
AVEL	CEPDR	N2U_022	655
IL1DR	RMEV	N2U_022	654
RIPR	RIH	N2U_022	596
AVEL	CEPDR	N2U_022	591
URYDR	RMDDL	N2U_022	589
SMDVL	RMEV	N2U_022	577
OLQDR	IL2R	N2U_022	558
RMDVR	RMDDL	N2U_022	558
IL2DR	IL1DR	N2U_022	507
IL2DR	RIPR	N2U_022	473
IL1L	URBL	N2U_022	471
URADR	RMEL	N2U_022	460
IL2DL	RMER	N2U_022	428
RMED	RIH	N2U_022	419
RMDVL	IL1DL	N2U_022	369
RMDVL	IL1DL	N2U_022	369
IL2DL	RMEL	N2U_022	368
CEPDL	RIH	N2U_022	362
OLQDR	RMEV	N2U_022	348
URYDR	RMDDL	N2U_022	313
IL1DR	URADR	N2U_022	312
AVEL	CEPDR	N2U_022	309
IL2DR	URADR	N2U_022	304
RMER	RMEV	N2U_022	301
RMDVR	URYDR	N2U_022	292
URYDL	RMEL	N2U_022	286
IL2R	RMEL	N2U_022	282
RIBR	RIS	N2U_022	279
IL1DL	RMEL	N2U_022	277
IL1DR	URYDR	N2U_022	269
RIBR	OLLR	N2U_022	263
IL2DL	RMED	N2U_022	260
CEPDL	URXL	N2U_022	250
RIBR	CEPDR	N2U_022	242
AVEL	RIS	N2U_022	238
RMED	RMEL	N2U_022	226
RMER	RMED	N2U_022	223
URYDR	RMED	N2U_022	223
IL1DR	OLQDR	N2U_022	218
URADR	RMED	N2U_022	217
URYDL	RMDVL	N2U_022	210
IL2DR	OLQDR	N2U_022	210
RMDVR	URYDR	N2U_022	208
CEPDR	RIS	N2U_022	205
RMDVR	IL1DR	N2U_022	200
RMER	IL1DR	N2U_022	200
IL1DR	RMED	N2U_022	199
RMEV	RMDDR	N2U_022	198
RMEV	RMDDR	N2U_022	196
IL1DR	SMDDL	N2U_022	193
IL2DL	RMEV	N2U_022	188
RMER	URADL	N2U_022	188
IL1DR	IL1DL	N2U_022	183
RMDDL	RMEV	N2U_022	176
RMEV	RMED	N2U_022	170
IL2DR	CEPDR	N2U_022	166
URADR	RMEV	N2U_022	158
IL1DL	RMEV	N2U_022	154
IL1DR	URYDR	N2U_022	151
IL1DL	OLLR	N2U_022	150
URADL	RMEL	N2U_022	147
CEPDR	URADR	N2U_022	139
RMEV	RMDDR	N2U_022	139
URBR	OLLR	N2U_022	138
URADL	IL1DL	N2U_022	137
RIPR	OLQDR	N2U_022	137
CEPDR	URYDR	N2U_022	126
URADL	RMEV	N2U_022	122
URYDR	SMDDL	N2U_022	121
IL1R	OLLR	N2U_022	120
CEPDR	URXR	N2U_022	117
RIBR	AVEL	N2U_022	115
IL2DR	IL1DR	N2U_022	114
URYDL	URADL	N2U_022	112
URYDR	OLQDR	N2U_022	112
RIBR	AVEL	N2U_022	111
RMDDL	RMEV	N2U_022	109
IL2DR	SMDDL	N2U_022	106
IL2DL	IL1DL	N2U_022	105
IL1DR	RMEV	N2U_022	103
IL1DR	URADR	N2U_022	103
URADR	RMDDL	N2U_022	101
URYDR	URADR	N2U_022	100
IL2DL	CEPDL	N2U_022	99
URYDL	RMED	N2U_022	95
IL2DR	URYDR	N2U_022	94
IL2DL	URADL	N2U_022	90
CEPDL	URADL	N2U_022	88
IL2DR	RMEL	N2U_022	83
URYDL	IL1DL	N2U_022	82
URYDR	URADR	N2U_022	77
IL2DL	URADL	N2U_022	76
URYDL	RMEV	N2U_022	71
RMER	RIPR	N2U_022	70
IL1DR	OLQDR	N2U_022	69
IL1DR	RMEV	N2U_022	69
IL2DR	URADR	N2U_022	68
URYDR	RMEV	N2U_022	57
RMEV	RMDDR	N2U_022	55
RIBR	RIS	N2U_022	52
RMDVL	RMEL	N2U_022	45
URYDL	URADL	N2U_022	44
RMER	URADR	N2U_022	37
IL2DL	RIH	N2U_022	32
URADR	IL2R	N2U_022	22
SMDVL	RMEV	N2U_022	13
SMDVL	RMDDR	N2U_022	13
RMDVR	IL1DR	N2U_023	2702
RMDVR	OLLR	N2U_023	2627
AVEL	OLLR	N2U_023	1971
CEPDR	OLLR	N2U_023	1311
RIPR	URADR	N2U_023	1311
RIPR	IL1DR	N2U_023	1221
OLQDR	RIH	N2U_023	1183
URYDL	RMDVL	N2U_023	1168
URADR	RMED	N2U_023	1038
AVEL	URYDR	N2U_023	976
IL1DR	OLLR	N2U_023	960
IL1DR	OLLR	N2U_023	958
RMDDL	RMDDR	N2U_023	879
AVEL	CEPDR	N2U_023	844
CEPDR	OLLR	N2U_023	799
AVEL	SMDDL	N2U_023	790
URADR	IL2R	N2U_023	768
OLQDR	SMDDL	N2U_023	715
RIPR	RIH	N2U_023	690
IL1DR	RMED	N2U_023	685
RMEV	RMDDR	N2U_023	685
AVEL	CEPDR	N2U_023	630
RMED	RIH	N2U_023	621
RMDVL	IL1DL	N2U_023	608
RMDVR	RMDDL	N2U_023	581
RMDVL	IL1DL	N2U_023	576
URBL	IL1L	N2U_023	566
OLQDR	IL2R	N2U_023	549
RMER	RIH	N2U_023	528
IL2DL	RMER	N2U_023	509
AVEL	CEPDR	N2U_023	483
URYDL	CEPDL	N2U_023	466
IL2DL	RMEL	N2U_023	465
CEPDR	RIS	N2U_023	465
RMEV	RMED	N2U_023	425
URYDR	RMDDL	N2U_023	419
IL2DR	RIPR	N2U_023	401
URYDL	RMDDR	N2U_023	392
SMDVR	RMEV	N2U_023	391
AVEL	RIS	N2U_023	365
RIBR	SMDDL	N2U_023	356
RMED	RMEL	N2U_023	351
URADR	RMEL	N2U_023	348
IL2DR	IL1DR	N2U_023	347
RMER	RMEV	N2U_023	346
IL2DL	RMED	N2U_023	345
AVEL	SMDDL	N2U_023	343
RIBR	URYDR	N2U_023	343
RIH	IL2R	N2U_023	339
OLQDR	RMEV	N2U_023	330
SMDVR	IL1DR	N2U_023	330
RMDDL	RMEV	N2U_023	323
IL1DL	RIH	N2U_023	292
URYDL	IL1DL	N2U_023	289
IL1DR	RMEV	N2U_023	287
CEPDL	URXL	N2U_023	287
URYDL	RMDVL	N2U_023	285
RMDDL	RMDDR	N2U_023	276
IL1DL	RMEL	N2U_023	271
IL2R	RMEL	N2U_023	270
URYDL	RMDDR	N2U_023	263
IL1DR	RMEV	N2U_023	260
IL1DR	URADR	N2U_023	254
RIBR	OLLR	N2U_023	241
RMDDL	RMEV	N2U_023	237
IL1DR	SMDDL	N2U_023	224
IL2DL	CEPDL	N2U_023	220
IL2DL	IL1DL	N2U_023	220
RMDVR	URYDR	N2U_023	218
RMER	IL1DR	N2U_023	214
RIBR	RIS	N2U_023	212
IL1DR	URYDR	N2U_023	203
IL2DL	RMEV	N2U_023	202
URYDL	RMEV	N2U_023	199
URADL	RMEL	N2U_023	197
SMDVR	RMEV	N2U_023	195
IL1DL	OLLR	N2U_023	191
IL1DL	RMEV	N2U_023	190
IL2DR	CEPDR	N2U_023	190
IL1DR	IL1DL	N2U_023	184
URYDL	RMDVL	N2U_023	183
URBL	BAGL	N2U_023	177
CEPDR	URYDR	N2U_023	175
IL2DR	OLQDR	N2U_023	175
URYDL	IL1DL	N2U_023	170
URYDR	RMED	N2U_023	164
IL1DR	OLQDR	N2U_023	162
IL1DR	URADR	N2U_023	155
IL2DR	URYDR	N2U_023	154
URYDL	RMEL	N2U_023	153
RIBR	AVEL	N2U_023	153
URADL	RMDDR	N2U_023	149
URYDR	SMDDL	N2U_023	148
URADL	IL1DL	N2U_023	147
RMDVR	IL1DR	N2U_023	134
URYDL	IL1DL	N2U_023	133
IL2DL	RIPL	N2U_023	131
CEPDR	URXR	N2U_023	130
IL1DR	URYDR	N2U_023	130
RMER	URADR	N2U_023	130
RMEV	RMED	N2U_023	128
RMER	URADL	N2U_023	127
URBR	OLLR	N2U_023	126
RMEV	RMDDR	N2U_023	120
URYDL	URADL	N2U_023	119
RMEV	IL2R	N2U_023	119
URYDR	SMDDL	N2U_023	115
RIBR	CEPDR	N2U_023	115
IL1R	OLLR	N2U_023	110
CEPDR	URADR	N2U_023	109
URYDL	RIH	N2U_023	108
URYDL	IL1DL	N2U_023	106
IL1DR	RMED	N2U_023	105
IL2DR	IL1DR	N2U_023	105
IL2DL	URADL	N2U_023	96
IL2DR	URADR	N2U_023	96
RMER	RMED	N2U_023	94
URYDR	OLQDR	N2U_023	88
OLLL	IL1DL	N2U_023	81
IL1DR	OLQDR	N2U_023	79
IL2DR	URADR	N2U_023	73
RMDDL	RMED	N2U_023	65
URADL	RMEV	N2U_023	63
IL1DL	RMED	N2U_023	59
IL2DL	URYDL	N2U_023	59
RMER	RMEL	N2U_023	59
URYDR	URADR	N2U_023	50
CEPDL	URADL	N2U_023	49
URYDL	IL1DL	N2U_023	49
CEPDL	IL1DL	N2U_023	48
IL2DR	SMDDL	N2U_023	44
IL2DL	URADL	N2U_023	35
URYDL	URADL	N2U_023	31
RMED	IL2R	N2U_023	28
SMDDL	RIS	N2U_023	22
SMDVL	RMEV	N2U_023	8
CEPDR	OLLR	N2U_024	3074
RMDVR	OLLR	N2U_024	2766
RMDVR	IL1DR	N2U_024	2541
RIPR	URADR	N2U_024	1395
AVEL	CEPDR	N2U_024	1247
RIPR	IL1DR	N2U_024	1193
RMDVL	URYDL	N2U_024	1068
OLQDR	RIH	N2U_024	1054
IL1DR	URADR	N2U_024	968
IL1DR	OLLR	N2U_024	942
CEPDR	RIS	N2U_024	938
IL1DR	OLLR	N2U_024	919
AVEL	URYDR	N2U_024	886
AVEL	SMDDL	N2U_024	848
RIPR	RIH	N2U_024	846
AVEL	CEPDR	N2U_024	806
URADR	IL2R	N2U_024	791
AVEL	OLLR	N2U_024	773
RMDDL	RMDDR	N2U_024	766
RMDVR	RMDDL	N2U_024	742
RMEV	RMDDR	N2U_024	728
RMER	RIH	N2U_024	686
AVEL	CEPDR	N2U_024	679
RMDVL	IL1DL	N2U_024	654
RMDVL	IL1DL	N2U_024	647
OLQDR	SMDDL	N2U_024	606
OLQDR	IL2R	N2U_024	604
OLQDL	RIH	N2U_024	570
CEPDR	OLLR	N2U_024	531
IL2DL	RMEL	N2U_024	517
RIBR	URYDR	N2U_024	508
RMEV	RMED	N2U_024	508
CEPDR	SMDDL	N2U_024	501
RIBR	AVEL	N2U_024	491
RMED	RIH	N2U_024	491
IL1DL	RMEV	N2U_024	490
RMEV	RMDDR	N2U_024	476
SMDVR	IL1DR	N2U_024	469
IL2R	RMEL	N2U_024	448
URBL	IL1L	N2U_024	424
RMDDL	RMDDR	N2U_024	404
URADR	RMEL	N2U_024	388
IL2DR	RIPR	N2U_024	377
RMED	RMEL	N2U_024	373
IL1DL	RMEL	N2U_024	372
RIH	IL2R	N2U_024	364
RMED	IL2R	N2U_024	354
URYDL	RMDDR	N2U_024	353
IL2DL	RMER	N2U_024	350
RMER	RMEV	N2U_024	320
IL2DR	IL1DR	N2U_024	318
URYDR	RMDDL	N2U_024	297
SMDVR	RMEV	N2U_024	290
SMDVR	RMEV	N2U_024	284
URYDL	RMDDR	N2U_024	281
URYDR	SMDDL	N2U_024	281
CEPDL	URYDL	N2U_024	276
RIBR	SMDDL	N2U_024	275
RMEV	RMED	N2U_024	267
AVEL	CEPDR	N2U_024	264
OLLL	IL1DL	N2U_024	264
CEPDL	URXL	N2U_024	262
IL1DR	RMEV	N2U_024	259
RMDVL	URYDL	N2U_024	253
RMER	URADR	N2U_024	250
IL1DL	OLLR	N2U_024	250
OLQDR	RMEV	N2U_024	248
URADL	RMDDR	N2U_024	246
RMDDL	RMEV	N2U_024	241
RIBR	RIS	N2U_024	230
RMDDL	RMEV	N2U_024	218
IL1DR	RMED	N2U_024	215
IL2DR	OLQDR	N2U_024	214
IL2DR	CEPDR	N2U_024	209
IL1DR	IL1DL	N2U_024	207
URYDR	SMDDL	N2U_024	205
URADR	RMED	N2U_024	200
URYDL	IL1DL	N2U_024	199
CEPDR	URYDR	N2U_024	198
RIBR	CEPDR	N2U_024	196
IL1DR	OLQDR	N2U_024	194
IL2DL	RMED	N2U_024	189
IL1DR	SMDDL	N2U_024	187
RMDVL	URYDL	N2U_024	185
IL2DR	URYDR	N2U_024	184
URADL	RMEL	N2U_024	176
OLLL	OLLR	N2U_024	170
IL2DL	RIH	N2U_024	158
IL1DR	URYDR	N2U_024	157
IL2DL	IL1DL	N2U_024	147
URADL	URYDL	N2U_024	146
IL1DR	URADR	N2U_024	145
CEPDR	SMDDL	N2U_024	144
RMDVR	URYDR	N2U_024	143
RIBR	RIS	N2U_024	142
IL1DL	RMED	N2U_024	142
IL2DL	URYDL	N2U_024	138
CEPDR	URXR	N2U_024	138
IL2DL	URADL	N2U_024	138
RMER	URADL	N2U_024	137
URADL	IL1DL	N2U_024	136
IL1DR	URYDR	N2U_024	131
RMDVL	RMDDR	N2U_024	127
IL1DR	URYDR	N2U_024	124
AVEL	OLLR	N2U_024	122
URYDL	IL1DL	N2U_024	120
AVEL	SMDDL	N2U_024	119
URYDL	RMEV	N2U_024	117
RMEV	RMED	N2U_024	117
IL2DL	CEPDL	N2U_024	115
IL1DR	RMEV	N2U_024	110
URYDL	IL1DL	N2U_024	109
CEPDL	URADL	N2U_024	108
RMER	IL1DR	N2U_024	106
IL2DR	IL1DR	N2U_024	106
RMEV	IL2R	N2U_024	104
RMER	RIPR	N2U_024	102
IL1R	OLLR	N2U_024	99
URYDL	RMEL	N2U_024	97
OLQDL	URYDL	N2U_024	93
URBR	OLLR	N2U_024	91
RMDVR	IL1DR	N2U_024	88
URYDL	IL1DL	N2U_024	86
URYDR	OLQDR	N2U_024	81
URYDL	IL1DL	N2U_024	80
IL1DL	RMED	N2U_024	80
URYDL	RIH	N2U_024	75
CEPDR	URADR	N2U_024	70
RMDDL	RMED	N2U_024	69
URXL	URYDL	N2U_024	68
IL2DR	URADR	N2U_024	62
IL2DL	URADL	N2U_024	62
URYDL	RMED	N2U_024	58
URYDR	URADR	N2U_024	58
URADL	RMEV	N2U_024	51
SMDDL	RIS	N2U_024	48
URADL	URYDL	N2U_024	46
CEPDR	URYDR	N2U_024	45
AVEL	URYDR	N2U_024	44
IL1L	BAGL	N2U_024	41
IL2DL	RIPL	N2U_024	38
IL1DR	RMED	N2U_024	38
IL1DL	RMEV	N2U_024	32
IL1DR	OLQDR	N2U_024	27
RMDDL	RMEV	N2U_024	15
CEPDR	OLLR	N2U_025	2589
IL1DR	RMDVR	N2U_025	2173
RMDVR	OLLR	N2U_025	2076
OLQDR	RIH	N2U_025	1706
URADR	RIPR	N2U_025	1488
IL1DR	RIPR	N2U_025	1323
IL1DR	URADR	N2U_025	1267
RIS	CEPDR	N2U_025	1143
RMDVL	URYDL	N2U_025	1127
IL1DR	OLLR	N2U_025	883
RMDVR	CEPDR	N2U_025	830
SMDDL	CEPDR	N2U_025	826
IL2R	URADR	N2U_025	761
RMDVL	IL1DL	N2U_025	755
AVEL	SMDDL	N2U_025	733
RMDDR	RMDDL	N2U_025	691
IL2R	OLQDR	N2U_025	675
AVEL	CEPDR	N2U_025	627
IL2DL	RMEL	N2U_025	617
RMDVL	IL1DL	N2U_025	615
RIPR	RIH	N2U_025	612
IL2DL	RIPL	N2U_025	574
RMDVR	RMDDL	N2U_025	553
RMED	RIH	N2U_025	543
SMDVL	RMEV	N2U_025	530
IL1DL	OLLL	N2U_025	517
IL2R	RMED	N2U_025	513
CEPDR	OLLR	N2U_025	501
OLQDL	RIH	N2U_025	499
CEPDR	OLLR	N2U_025	466
IL2R	RMEL	N2U_025	440
IL1L	URBL	N2U_025	428
SMDDL	RIBR	N2U_025	420
IL1DR	OLLR	N2U_025	411
AVEL	RIBR	N2U_025	409
SMDVR	RMEV	N2U_025	401
RMDDR	RMEV	N2U_025	386
RMDDR	URYDL	N2U_025	386
URYDR	SMDDL	N2U_025	375
RMER	RIH	N2U_025	372
AVEL	CEPDR	N2U_025	364
AVEL	OLLR	N2U_025	361
RMDDR	URYDL	N2U_025	345
IL1DL	RMEL	N2U_025	345
URYDR	SMDDL	N2U_025	332
IL2DL	RMED	N2U_025	330
IL2DR	RIPR	N2U_025	326
SMDDL	OLQDR	N2U_025	324
IL1DR	RMEV	N2U_025	316
IL1DL	RMEV	N2U_025	312
[truncated: 106,433 more rows]
